# Supplementary material for: Cell Dynamics in WOX5-Overexpressing Root Tips: The Impact of Local Auxin Biosynthesis
Source: Front Plant Sci. 2020 Oct 22;11:560169. doi: 10.3389/fpls.2020.560169 (PMC7642516; doi:10.3389/fpls.2020.560169)
Supplement: Supplementary Table 1 — Quantitative analysis of mitotic and S-phase nuclei distributions in 35S:WOX5-GR root tips at 0, 12, and 48 h of DEX incubation. Analysis performed on the root tip models created in iRoCs Toolbox (Schmidt et al., 2014) using 3D confocal images labeled by EdU/DAPI. [file Data_Sheet_2.XLSX]

## Sheet: annotation
For our analysis we used bold mark columns
			1-root cap
			2-epidermis
			3-cortex
			4-endodermis
			5-pericycle
			6-vascular tissue
			7-QC										0-non mitotic nucleus		-1-non S-phase nucleus
													1-mitotic nucleus		2 or 3 -S-phase nucleus
			cell type			cylindric coordinates
x (micron)	y (micron)	z (micron)	label	predicted label	manual	distance from QC (z) (micron)	radial distance (r) (micron)	phi (radians)	radius (micron)	coefficients	subtype	predicted subtype	mitotic	predicted mitotic	cellfile	predicted cellfile	value	confidence	sphase	distance from border (micron)	volume (cube microns)
296	75	22	2	3	1	166.383	36.9765	1.71144	2		-1	-1	0	0	-1	-1	7.91785	-1	-1	-1	-1
205	113	65	2	2	0	74.5244	35.8176	-0.0712725	2		-1	-1	0	0	-1	-1	7.84489	-1	-1	-1	-1
333	107	61	3	3	0	203.072	28.5529	-0.0353532	2		-1	-1	0	0	-1	-1	7.83466	-1	-1	-1	-1
305	86	24	2	2	0	175.41	35.5556	1.40677	2		-1	-1	0	0	-1	-1	7.74628	-1	-1	-1	-1
306	104	31	2	2	0	176.532	37.8164	0.877481	2		-1	-1	0	0	-1	-1	7.71979	-1	-1	-1	-1
150	116	62	1	1	0	19.0686	37.8482	0.00322295	2		-1	-1	0	0	-1	-1	7.70755	-1	-1	-1	-1
399	67	32	3	3	0	268.355	29.24	2.05373	2		-1	-1	0	0	-1	-1	7.70588	-1	-1	-1	-1
360	38	58	2	2	0	229.412	40.8387	-3.09238	2		-1	-1	0	0	-1	-1	7.68381	-1	-1	-1	-1
313	37	69	2	2	0	182.072	42.6061	-2.83811	2		-1	-1	0	0	-1	-1	7.64795	-1	-1	-1	-1

## Sheet: 0h
x (micron)	y (micron)	z (micron)	label	predicted label	manual	distance from QC (z) (micron)	radial distance (r) (micron)	phi (radians)	radius (micron)	coefficients	subtype	predicted subtype	mitotic	predicted mitotic	cellfile	predicted cellfile	value	confidence	sphase	distance from border (micron)	volume (cube microns)
295.659	55.6847	61.74	2	-1	1	125.666	44.3447	3.03688	2.13258		-1	-1	0	0	2	-1	-1	-1	-1	-1	-1
290.024	55.3532	61.74	2	-1	1	120.151	44.9229	3.04006	2.13258		-1	-1	0	0	2	-1	-1	-1	-1	-1	-1
269.806	60.3251	61.74	2	-1	1	100.03	41.0106	3.02945	2.13258		-1	-1	0	0	2	-1	-1	-1	-1	-1	-1
266.16	60.3251	61.74	2	-1	1	96.4419	41.206	3.03052	2.13258		-1	-1	0	0	2	-1	-1	-1	-1	-1	-1
241.963	66.2913	61.74	2	-1	1	72.2468	36.7385	3.01157	2.13258		-1	-1	0	0	2	-1	-1	-1	-1	-1	-1
237.654	66.9542	61.74	2	-1	1	67.9526	36.3571	3.0093	2.13258		-1	-1	0	0	2	-1	-1	-1	-1	-1	-1
479.949	64.634	32.6557	2	-1	1	306.193	52.2918	2.30805	2.13258		-1	-1	0	0	2	-1	-1	-1	-1	-1	-1
481.275	140.869	37.959	2	-1	1	309.693	55.1988	0.728964	2.13258		-1	-1	0	0	2	-1	-1	-1	-1	-1	-1
334.771	48.7241	68.6	2	-1	1	164.359	49.3344	-3.10386	2.13258		-1	-1	0	0	2	-1	-1	-1	-1	-1	-1
485.584	45.4095	66.64	2	-1	1	312.163	53.2126	3.06503	2.13258		-1	-1	0	0	2	-1	-1	-1	-1	-1	-1
471.331	49.0556	66.64	2	-1	1	298.191	49.1849	3.06297	2.13258		-1	-1	0	0	2	-1	-1	-1	-1	-1	-1
456.416	47.3983	66.64	2	-1	1	283.46	50.461	3.0745	2.13258		-1	-1	0	0	2	-1	-1	-1	-1	-1	-1
450.449	46.4039	66.64	2	-1	1	277.574	51.3213	3.07978	2.13258		-1	-1	0	0	2	-1	-1	-1	-1	-1	-1
444.483	44.0837	66.64	2	-1	1	271.677	53.5138	3.08741	2.13258		-1	-1	0	0	2	-1	-1	-1	-1	-1	-1
501.162	48.7241	66.64	2	-1	1	327.662	50.4278	3.05059	2.13258		-1	-1	0	0	2	-1	-1	-1	-1	-1	-1
496.853	45.4095	66.64	2	-1	1	323.298	53.5693	3.06049	2.13258		-1	-1	0	0	2	-1	-1	-1	-1	-1	-1
490.887	45.741	66.64	2	-1	1	317.411	53.0481	3.06207	2.13258		-1	-1	0	0	2	-1	-1	-1	-1	-1	-1
547.566	44.4152	66.64	2	-1	1	373.563	56.4236	3.04841	2.13258		-1	-1	0	0	2	-1	-1	-1	-1	-1	-1
507.128	155.122	66.64	2	-1	1	337.031	56.6042	0.165945	2.13258		-1	-1	0	0	2	-1	-1	-1	-1	-1	-1
467.022	153.133	66.64	2	-1	1	296.33	55.6436	0.14948	2.13258		-1	-1	0	0	2	-1	-1	-1	-1	-1	-1
460.725	153.133	66.64	2	-1	1	289.928	55.7648	0.145997	2.13258		-1	-1	0	0	2	-1	-1	-1	-1	-1	-1
543.257	157.773	66.64	2	-1	1	373.571	58.043	0.174995	2.13258		-1	-1	0	0	2	-1	-1	-1	-1	-1	-1
593.307	158.768	66.64	2	-1	1	423.89	57.1166	0.186972	2.13258		-1	-1	0	0	2	-1	-1	-1	-1	-1	-1
576.403	158.768	66.64	2	-1	1	406.931	57.7861	0.182953	2.13258		-1	-1	0	0	2	-1	-1	-1	-1	-1	-1
561.487	157.773	66.64	2	-1	1	391.909	57.3741	0.181082	2.13258		-1	-1	0	0	2	-1	-1	-1	-1	-1	-1
647.997	159.762	66.64	2	-1	1	478.688	55.8383	0.191632	2.13258		-1	-1	0	0	2	-1	-1	-1	-1	-1	-1
588.004	47.0668	68.6	2	-1	1	413.98	55.2082	3.07229	2.13258		-1	-1	0	0	2	-1	-1	-1	-1	-1	-1
596.622	45.4095	68.6	2	-1	1	422.512	57.2144	3.07513	2.13258		-1	-1	0	0	2	-1	-1	-1	-1	-1	-1
574.414	45.4095	68.6	2	-1	1	400.361	56.2898	3.07677	2.13258		-1	-1	0	0	2	-1	-1	-1	-1	-1	-1
565.465	45.741	68.6	2	-1	1	391.457	55.5932	3.07729	2.13258		-1	-1	0	0	2	-1	-1	-1	-1	-1	-1
559.83	46.4039	68.6	2	-1	1	385.872	54.7057	3.07689	2.13258		-1	-1	0	0	2	-1	-1	-1	-1	-1	-1
647.003	160.756	54.88	2	-1	1	477.774	59.7198	0.385166	2.13258		-1	-1	0	0	2	-1	-1	-1	-1	-1	-1
608.554	158.105	54.88	2	-1	1	439.101	58.7489	0.391014	2.13258		-1	-1	0	0	2	-1	-1	-1	-1	-1	-1
599.936	153.133	54.88	2	-1	1	430.239	54.4267	0.419243	2.13258		-1	-1	0	0	2	-1	-1	-1	-1	-1	-1
589.993	152.47	54.88	2	-1	1	420.222	54.1726	0.41989	2.13258		-1	-1	0	0	2	-1	-1	-1	-1	-1	-1
578.723	152.801	54.88	2	-1	1	408.907	54.8791	0.413011	2.13258		-1	-1	0	0	2	-1	-1	-1	-1	-1	-1
569.442	151.807	54.88	2	-1	1	399.531	54.2702	0.415509	2.13258		-1	-1	0	0	2	-1	-1	-1	-1	-1	-1
489.561	148.161	54.88	2	-1	1	318.748	53.0144	0.394879	2.13258		-1	-1	0	0	2	-1	-1	-1	-1	-1	-1
483.595	148.493	54.88	2	-1	1	312.709	53.4324	0.388941	2.13258		-1	-1	0	0	2	-1	-1	-1	-1	-1	-1
477.96	148.824	54.88	2	-1	1	307.001	53.8372	0.383274	2.13258		-1	-1	0	0	2	-1	-1	-1	-1	-1	-1
470.668	147.498	54.88	2	-1	1	299.565	52.6948	0.386896	2.13258		-1	-1	0	0	2	-1	-1	-1	-1	-1	-1
464.039	147.498	54.88	2	-1	1	292.831	52.7776	0.382561	2.13258		-1	-1	0	0	2	-1	-1	-1	-1	-1	-1
459.399	147.498	54.88	2	-1	1	288.115	52.8279	0.379534	2.13258		-1	-1	0	0	2	-1	-1	-1	-1	-1	-1
484.589	46.4039	54.88	2	-1	1	310.903	54.874	2.84885	2.13258		-1	-1	0	0	2	-1	-1	-1	-1	-1	-1
474.977	48.0612	54.88	2	-1	1	301.445	52.9909	2.84156	2.13258		-1	-1	0	0	2	-1	-1	-1	-1	-1	-1
506.466	45.4095	54.88	2	-1	1	332.54	56.603	2.84942	2.13258		-1	-1	0	0	2	-1	-1	-1	-1	-1	-1
540.274	43.7523	54.88	2	-1	1	366.087	59.5027	2.85423	2.13258		-1	-1	0	0	2	-1	-1	-1	-1	-1	-1
559.167	44.0837	54.88	2	-1	1	384.935	59.9677	2.85173	2.13258		-1	-1	0	0	2	-1	-1	-1	-1	-1	-1
574.083	45.0781	54.88	2	-1	1	399.868	59.6498	2.84663	2.13258		-1	-1	0	0	2	-1	-1	-1	-1	-1	-1
596.622	45.0781	54.88	2	-1	1	422.408	60.5853	2.84862	2.13258		-1	-1	0	0	2	-1	-1	-1	-1	-1	-1
652.969	63.9711	31.36	2	-1	1	479.753	59.6071	2.3651	2.13258		-1	-1	0	0	2	-1	-1	-1	-1	-1	-1
644.02	61.9824	31.36	2	-1	1	470.658	60.7361	2.38413	2.13258		-1	-1	0	0	2	-1	-1	-1	-1	-1	-1
598.61	144.184	31.36	2	-1	1	428.403	60.2892	0.849358	2.13258		-1	-1	0	0	2	-1	-1	-1	-1	-1	-1
511.106	140.869	31.36	2	-1	1	339.79	59.4663	0.834169	2.13258		-1	-1	0	0	2	-1	-1	-1	-1	-1	-1
709.648	155.122	30.38	2	-1	1	540.568	65.1508	0.785186	2.13258		-1	-1	0	0	3	-1	-1	-1	-1	-1	-1
688.104	154.459	30.38	2	-1	1	518.907	65.4806	0.785653	2.13258		-1	-1	0	0	3	-1	-1	-1	-1	-1	-1
669.211	149.818	30.38	2	-1	1	499.727	62.81	0.828998	2.13258		-1	-1	0	0	3	-1	-1	-1	-1	-1	-1
652.969	149.818	30.38	2	-1	1	483.394	63.3563	0.822377	2.13258		-1	-1	0	0	3	-1	-1	-1	-1	-1	-1
647.003	88.4989	16.66	2	-1	1	474.828	60.4103	1.88086	2.13258		-1	-1	0	0	3	-1	-1	-1	-1	-1	-1
624.464	118.33	19.6	2	-1	1	453.351	57.2991	1.35241	2.13258		-1	-1	0	0	3	-1	-1	-1	-1	-1	-1
717.272	76.235	19.6	2	-1	1	545.151	62.9675	2.13081	2.13258		-1	-1	0	0	3	-1	-1	-1	-1	-1	-1
696.059	73.9148	19.6	2	-1	1	523.673	63.9175	2.14843	2.13258		-1	-1	0	0	3	-1	-1	-1	-1	-1	-1
809.417	122.639	20.58	2	-1	1	639.632	53.2273	1.39316	2.13258		-1	-1	0	0	3	-1	-1	-1	-1	-1	-1
857.809	122.639	20.58	2	-1	1	688.195	51.573	1.42039	2.13258		-1	-1	0	0	2	-1	-1	-1	-1	-1	-1
831.624	126.616	20.58	2	-1	1	662.066	53.4498	1.3329	2.13258		-1	-1	0	0	2	-1	-1	-1	-1	-1	-1
787.541	122.97	20.58	2	-1	1	617.678	53.9964	1.37449	2.13258		-1	-1	0	0	2	-1	-1	-1	-1	-1	-1
845.877	84.5214	20.58	2	-1	1	674.872	58.0416	2.11267	2.13258		-1	-1	0	0	2	-1	-1	-1	-1	-1	-1
761.356	79.5496	20.58	2	-1	1	589.671	60.7122	2.12266	2.13258		-1	-1	0	0	2	-1	-1	-1	-1	-1	-1
737.822	76.8979	20.58	2	-1	1	565.868	61.9334	2.1435	2.13258		-1	-1	0	0	2	-1	-1	-1	-1	-1	-1
678.16	71.5946	20.58	2	-1	1	505.52	64.043	2.17598	2.13258		-1	-1	0	0	2	-1	-1	-1	-1	-1	-1
658.604	70.6002	20.58	2	-1	1	485.756	64.2388	2.17717	2.13258		-1	-1	0	0	2	-1	-1	-1	-1	-1	-1
661.587	120.982	20.58	2	-1	1	490.898	56.5665	1.32915	2.13258		-1	-1	0	0	2	-1	-1	-1	-1	-1	-1
669.211	122.97	20.58	2	-1	1	498.664	57.0134	1.30087	2.13258		-1	-1	0	0	2	-1	-1	-1	-1	-1	-1
546.24	114.352	20.58	2	-1	1	374.177	55.5253	1.35808	2.13258		-1	-1	0	0	2	-1	-1	-1	-1	-1	-1
553.201	117.004	20.58	2	-1	1	381.317	56.2762	1.31765	2.13258		-1	-1	0	0	2	-1	-1	-1	-1	-1	-1
562.15	115.015	20.58	2	-1	1	390.284	55.7552	1.35844	2.13258		-1	-1	0	0	2	-1	-1	-1	-1	-1	-1
568.448	115.678	20.58	2	-1	1	396.675	55.9341	1.35171	2.13258		-1	-1	0	0	2	-1	-1	-1	-1	-1	-1
581.706	114.352	20.58	2	-1	1	410.016	55.6121	1.38474	2.13258		-1	-1	0	0	2	-1	-1	-1	-1	-1	-1
598.942	116.01	20.58	2	-1	1	427.493	55.9562	1.36891	2.13258		-1	-1	0	0	2	-1	-1	-1	-1	-1	-1
606.234	116.341	20.58	2	-1	1	434.869	55.9979	1.36864	2.13258		-1	-1	0	0	2	-1	-1	-1	-1	-1	-1
612.2	117.004	20.58	2	-1	1	440.92	56.1211	1.36164	2.13258		-1	-1	0	0	2	-1	-1	-1	-1	-1	-1
447.135	107.392	22.54	2	-1	1	273.996	50.388	1.41403	2.13258		-1	-1	0	0	2	-1	-1	-1	-1	-1	-1
475.972	74.5777	22.54	2	-1	1	302.205	55.3892	2.05018	2.13258		-1	-1	0	0	2	-1	-1	-1	-1	-1	-1
468.348	74.2463	22.54	2	-1	1	294.587	55.2608	2.05425	2.13258		-1	-1	0	0	2	-1	-1	-1	-1	-1	-1
402.72	75.5721	22.54	2	-1	1	229.47	52.6117	2.03422	2.13258		-1	-1	0	0	2	-1	-1	-1	-1	-1	-1
396.753	73.9148	22.54	2	-1	1	223.588	53.1569	2.06425	2.13258		-1	-1	0	0	2	-1	-1	-1	-1	-1	-1
390.787	75.5721	22.54	2	-1	1	217.699	52.3119	2.03764	2.13258		-1	-1	0	0	2	-1	-1	-1	-1	-1	-1
385.484	75.9035	22.54	2	-1	1	212.471	52.0549	2.03369	2.13258		-1	-1	0	0	2	-1	-1	-1	-1	-1	-1
379.518	76.8979	22.54	2	-1	1	206.586	51.5286	2.01838	2.13258		-1	-1	0	0	2	-1	-1	-1	-1	-1	-1
372.889	76.5665	22.54	2	-1	1	200.066	51.5295	2.0271	2.13258		-1	-1	0	0	2	-1	-1	-1	-1	-1	-1
368.911	75.9035	22.54	2	-1	1	196.165	51.7287	2.04066	2.13258		-1	-1	0	0	2	-1	-1	-1	-1	-1	-1
363.276	77.5608	22.54	2	-1	1	190.597	50.9704	2.01391	2.13258		-1	-1	0	0	2	-1	-1	-1	-1	-1	-1
444.483	73.9148	22.54	2	-1	1	270.821	54.578	2.05765	2.13258		-1	-1	0	0	3	-1	-1	-1	-1	-1	-1
434.208	73.5833	22.54	2	-1	1	260.616	54.3822	2.06333	2.13258		-1	-1	0	0	3	-1	-1	-1	-1	-1	-1
491.881	74.9092	22.54	2	-1	1	318.124	55.8106	2.04858	2.13258		-1	-1	0	0	3	-1	-1	-1	-1	-1	-1
482.932	74.9092	22.54	2	-1	1	309.17	55.4956	2.04627	2.13258		-1	-1	0	0	3	-1	-1	-1	-1	-1	-1
344.383	76.8979	22.54	2	-1	1	172.058	51.0005	2.03669	2.13258		-1	-1	0	0	3	-1	-1	-1	-1	-1	-1
337.423	77.5608	22.54	2	-1	1	165.211	50.6775	2.02937	2.13258		-1	-1	0	0	3	-1	-1	-1	-1	-1	-1
528.673	141.2	31.36	2	-1	1	357.603	59.5262	0.841826	2.13258		-1	-1	0	0	3	-1	-1	-1	-1	-1	-1
563.808	142.195	31.36	2	-1	1	393.186	59.6775	0.852516	2.13258		-1	-1	0	0	3	-1	-1	-1	-1	-1	-1
581.706	143.521	31.36	2	-1	1	411.319	60.228	0.847495	2.13258		-1	-1	0	0	3	-1	-1	-1	-1	-1	-1
678.823	53.3645	101.92	2	-1	1	504.793	58.9928	-2.62037	2.13258		-1	-1	0	0	2	-1	-1	-1	-1	-1	-1
662.582	52.7016	101.92	2	-1	1	488.594	58.9298	-2.62179	2.13258		-1	-1	0	0	2	-1	-1	-1	-1	-1	-1
646.672	50.0499	101.92	2	-1	1	472.65	60.6691	-2.63766	2.13258		-1	-1	0	0	2	-1	-1	-1	-1	-1	-1
590.987	150.481	94.08	2	-1	1	421.406	52.0342	-0.336377	2.13258		-1	-1	0	0	2	-1	-1	-1	-1	-1	-1
600.599	150.481	94.08	2	-1	1	430.991	51.6421	-0.338216	2.13258		-1	-1	0	0	2	-1	-1	-1	-1	-1	-1
668.548	157.442	94.08	2	-1	1	498.95	55.4922	-0.311817	2.13258		-1	-1	0	0	2	-1	-1	-1	-1	-1	-1
582.701	150.15	94.08	2	-1	1	413.126	52.0672	-0.337426	2.13258		-1	-1	0	0	2	-1	-1	-1	-1	-1	-1
529.336	146.835	94.08	2	-1	1	359.653	51.2072	-0.359307	2.13258		-1	-1	0	0	2	-1	-1	-1	-1	-1	-1
522.707	144.846	94.08	2	-1	1	352.939	49.6536	-0.375458	2.13258		-1	-1	0	0	2	-1	-1	-1	-1	-1	-1
514.089	144.846	94.08	2	-1	1	344.296	49.9987	-0.376232	2.13258		-1	-1	0	0	2	-1	-1	-1	-1	-1	-1
495.859	144.184	94.08	2	-1	1	325.963	50.1031	-0.384355	2.13258		-1	-1	0	0	2	-1	-1	-1	-1	-1	-1
489.23	144.846	94.08	2	-1	1	319.312	50.9544	-0.380264	2.13258		-1	-1	0	0	2	-1	-1	-1	-1	-1	-1
475.972	145.178	94.08	2	-1	1	305.958	51.7315	-0.380823	2.13258		-1	-1	0	0	2	-1	-1	-1	-1	-1	-1
318.861	60.3251	92.12	2	-1	1	148.749	44.9173	-2.5463	2.13258		-1	-1	0	0	2	-1	-1	-1	-1	-1	-1
313.889	61.6509	92.12	2	-1	1	143.779	43.9937	-2.53117	2.13258		-1	-1	0	0	2	-1	-1	-1	-1	-1	-1
309.912	61.6509	92.12	2	-1	1	139.841	44.1569	-2.53193	2.13258		-1	-1	0	0	2	-1	-1	-1	-1	-1	-1
305.603	62.3138	92.12	2	-1	1	135.546	43.7793	-2.5248	2.13258		-1	-1	0	0	2	-1	-1	-1	-1	-1	-1
283.064	144.184	64.68	2	-1	1	108.85	44.0641	0.122784	2.13258		-1	-1	0	0	2	-1	-1	-1	-1	-1	-1
276.435	142.858	64.68	2	-1	1	102.211	42.3947	0.125056	2.13258		-1	-1	0	0	2	-1	-1	-1	-1	-1	-1
251.244	138.88	64.68	2	-1	1	77.0107	36.9932	0.13606	2.13258		-1	-1	0	0	2	-1	-1	-1	-1	-1	-1
230.031	68.28	63.7	2	-1	1	60.3288	35.2464	3.05904	2.13258		-1	-1	0	0	2	-1	-1	-1	-1	-1	-1
226.053	69.9373	63.7	2	-1	1	56.289	33.8704	3.0531	2.13258		-1	-1	0	0	2	-1	-1	-1	-1	-1	-1
220.75	68.943	63.7	2	-1	1	51.1123	35.2123	3.05706	2.13258		-1	-1	0	0	2	-1	-1	-1	-1	-1	-1
283.395	139.212	55.86	2	-1	1	109.385	40.871	0.349837	2.13258		-1	-1	0	0	2	-1	-1	-1	-1	-1	-1
279.086	138.88	55.86	2	-1	1	105.057	40.3344	0.353395	2.13258		-1	-1	0	0	2	-1	-1	-1	-1	-1	-1
266.822	135.566	55.86	2	-1	1	92.889	36.548	0.385408	2.13258		-1	-1	0	0	2	-1	-1	-1	-1	-1	-1
263.839	135.566	55.86	2	-1	1	89.8887	36.386	0.386843	2.13258		-1	-1	0	0	2	-1	-1	-1	-1	-1	-1
260.193	135.566	55.86	2	-1	1	86.2229	36.1856	0.388729	2.13258		-1	-1	0	0	2	-1	-1	-1	-1	-1	-1
255.222	136.56	55.86	2	-1	1	81.166	36.8436	0.38237	2.13258		-1	-1	0	0	2	-1	-1	-1	-1	-1	-1
248.261	64.3026	55.86	2	-1	1	78.5882	39.7077	2.87218	2.13258		-1	-1	0	0	2	-1	-1	-1	-1	-1	-1
241.3	66.6228	55.86	2	-1	1	71.5902	37.9222	2.85642	2.13258		-1	-1	0	0	2	-1	-1	-1	-1	-1	-1
233.345	69.6059	55.86	2	-1	1	63.5587	35.6042	2.83307	2.13258		-1	-1	0	0	2	-1	-1	-1	-1	-1	-1
191.913	82.5327	55.86	2	-1	1	21.6399	26.6145	2.68765	2.13258		-1	-1	0	0	2	-1	-1	-1	-1	-1	-1
281.407	137.554	45.08	2	-1	1	107.4	43.7851	0.599278	2.13258		-1	-1	0	0	2	-1	-1	-1	-1	-1	-1
276.103	136.892	45.08	2	-1	1	102.106	42.9724	0.610294	2.13258		-1	-1	0	0	2	-1	-1	-1	-1	-1	-1
270.469	136.892	45.08	2	-1	1	96.4482	42.7014	0.613742	2.13258		-1	-1	0	0	2	-1	-1	-1	-1	-1	-1
263.508	135.897	45.08	2	-1	1	89.5206	41.5317	0.631439	2.13258		-1	-1	0	0	2	-1	-1	-1	-1	-1	-1
255.222	131.92	45.08	2	-1	1	81.4528	37.8981	0.696559	2.13258		-1	-1	0	0	2	-1	-1	-1	-1	-1	-1
259.199	67.6171	45.08	2	-1	1	89.1534	40.9005	2.58731	2.13258		-1	-1	0	0	2	-1	-1	-1	-1	-1	-1
253.896	68.6115	45.08	2	-1	1	83.8843	40.3356	2.57779	2.13258		-1	-1	0	0	2	-1	-1	-1	-1	-1	-1
241.3	78.2237	45.08	2	-1	1	70.9056	33.4786	2.42606	2.13258		-1	-1	0	0	2	-1	-1	-1	-1	-1	-1
237.986	78.8866	45.08	2	-1	1	67.5959	33.1604	2.41636	2.13258		-1	-1	0	0	2	-1	-1	-1	-1	-1	-1
232.682	79.881	45.08	2	-1	1	62.3018	32.713	2.40188	2.13258		-1	-1	0	0	2	-1	-1	-1	-1	-1	-1
227.379	79.5496	45.08	2	-1	1	57.0917	33.2207	2.41555	2.13258		-1	-1	0	0	2	-1	-1	-1	-1	-1	-1
217.104	83.527	45.08	2	-1	1	46.6839	31.0118	2.33994	2.13258		-1	-1	0	0	2	-1	-1	-1	-1	-1	-1
296.322	81.5383	26.46	2	-1	1	124.79	45.5336	2.02039	2.13258		-1	-1	0	0	2	-1	-1	-1	-1	-1	-1
291.019	80.8754	26.46	2	-1	1	119.614	45.8536	2.03894	2.13258		-1	-1	0	0	2	-1	-1	-1	-1	-1	-1
272.457	99.1055	26.46	2	-1	1	100.423	41.6748	1.65366	2.13258		-1	-1	0	0	2	-1	-1	-1	-1	-1	-1
267.485	99.1055	26.46	2	-1	1	95.5139	41.6686	1.66013	2.13258		-1	-1	0	0	2	-1	-1	-1	-1	-1	-1
327.148	116.01	26.46	2	-1	1	153.907	45.7886	1.21876	2.13258		-1	-1	0	0	2	-1	-1	-1	-1	-1	-1
321.181	116.673	26.46	2	-1	1	147.937	45.8711	1.20885	2.13258		-1	-1	0	0	2	-1	-1	-1	-1	-1	-1
361.288	71.2632	26.46	2	-1	1	188.857	50.324	2.16094	2.13258		-1	-1	0	0	2	-1	-1	-1	-1	-1	-1
357.973	67.9486	26.46	2	-1	1	185.673	52.095	2.21712	2.13258		-1	-1	0	0	2	-1	-1	-1	-1	-1	-1
334.108	141.2	26.46	1	-1	1	160.05	60.4123	0.821142	2.13258		-1	-1	0	0	2	-1	-1	-1	-1	-1	-1
302.951	139.212	26.46	1	-1	1	128.791	57.8441	0.853868	2.13258		-1	-1	0	0	2	-1	-1	-1	-1	-1	-1
291.019	140.538	26.46	1	-1	1	116.762	58.2921	0.842927	2.13258		-1	-1	0	0	2	-1	-1	-1	-1	-1	-1
282.069	139.875	26.46	1	-1	1	107.83	57.4748	0.856001	2.13258		-1	-1	0	0	2	-1	-1	-1	-1	-1	-1
237.986	111.701	26.46	1	-1	1	65.5986	42.5859	1.40414	2.13258		-1	-1	0	0	2	-1	-1	-1	-1	-1	-1
249.918	112.032	26.46	1	-1	1	77.3935	42.7874	1.37953	2.13258		-1	-1	0	0	2	-1	-1	-1	-1	-1	-1
212.795	107.723	26.46	1	-1	1	40.9452	41.963	1.5366	2.13258		-1	-1	0	0	2	-1	-1	-1	-1	-1	-1
213.789	103.414	26.46	1	-1	1	42.226	41.8383	1.63724	2.13258		-1	-1	0	0	2	-1	-1	-1	-1	-1	-1
236.328	82.2012	26.46	1	-1	1	65.8352	46.4939	2.07335	2.13258		-1	-1	0	0	2	-1	-1	-1	-1	-1	-1
286.378	64.634	26.46	1	-1	1	115.84	54.7014	2.31642	2.13258		-1	-1	0	0	2	-1	-1	-1	-1	-1	-1
221.744	83.527	27.44	1	-1	1	51.4075	45.5386	2.07462	2.13258		-1	-1	0	0	2	-1	-1	-1	-1	-1	-1
198.211	85.1843	23.52	1	-1	1	28.1383	49.3085	2.03649	2.13258		-1	-1	0	0	2	-1	-1	-1	-1	-1	-1
370.9	126.285	59.78	4	-1	1	198.343	30.6641	0.372491	2		-1	-1	1	0	-1	-1	-1	-1	-1	-1	-1
359.63	125.291	59.78	4	-1	1	186.969	29.4449	0.376367	2		-1	-1	1	0	-1	-1	-1	-1	-1	-1	-1
345.378	126.285	59.78	4	-1	1	172.548	29.9689	0.358735	2		-1	-1	1	0	-1	-1	-1	-1	-1	-1	-1
338.749	125.953	59.78	4	-1	1	165.863	29.4354	0.359682	2		-1	-1	1	0	-1	-1	-1	-1	-1	-1	-1
355.321	104.077	42.14	4	-1	1	182.665	27.9323	1.37875	2		-1	-1	1	0	-1	-1	-1	-1	-1	-1	-1
418.63	106.066	44.1	4	-1	1	246.019	28.4319	1.29195	2		-1	-1	0	0	-1	-1	-1	-1	-1	-1	-1
411.338	107.06	44.1	4	-1	1	238.712	28.5662	1.25544	2		-1	-1	0	0	-1	-1	-1	-1	-1	-1	-1
404.708	104.409	44.1	4	-1	1	232.067	27.5572	1.34283	2		-1	-1	0	0	-1	-1	-1	-1	-1	-1	-1
397.085	104.409	44.1	4	-1	1	224.437	27.3366	1.34108	2		-1	-1	0	0	-1	-1	-1	-1	-1	-1	-1
388.467	102.752	44.1	4	-1	1	215.828	26.6838	1.40003	2		-1	-1	0	0	-1	-1	-1	-1	-1	-1	-1
380.844	103.746	44.1	4	-1	1	208.2	26.6888	1.36437	2		-1	-1	0	0	-1	-1	-1	-1	-1	-1	-1
361.288	103.414	43.12	4	-1	1	188.653	26.9962	1.39097	2		-1	-1	0	0	-1	-1	-1	-1	-1	-1	-1
370.403	103.746	43.12	4	-1	1	197.745	27.334	1.37545	2		-1	-1	0	0	-1	-1	-1	-1	-1	-1	-1
426.087	107.558	43.12	4	-1	1	253.482	30.0476	1.25926	2		-1	-1	0	0	2	-1	-1	-1	-1	-1	-1
431.888	106.895	43.12	4	-1	1	259.297	29.9719	1.28383	2		-1	-1	0	0	2	-1	-1	-1	-1	-1	-1
437.523	105.9	43.12	4	-1	1	264.94	29.8079	1.3194	2		-1	-1	0	0	2	-1	-1	-1	-1	-1	-1
335.434	105.735	43.12	4	-1	1	162.811	26.863	1.32535	2		-1	-1	0	0	2	-1	-1	-1	-1	-1	-1
329.302	105.569	43.12	4	-1	1	156.704	26.6504	1.33707	2		-1	-1	0	0	2	-1	-1	-1	-1	-1	-1
323.336	105.9	43.12	4	-1	1	150.748	26.5844	1.3314	2		-1	-1	0	0	2	-1	-1	-1	-1	-1	-1
317.867	106.232	43.12	4	-1	1	145.288	26.5358	1.32573	2		-1	-1	0	0	2	-1	-1	-1	-1	-1	-1
312.398	105.569	43.12	4	-1	1	139.867	26.2209	1.35678	2		-1	-1	0	0	2	-1	-1	-1	-1	-1	-1
307.757	106.232	43.12	4	-1	1	135.22	26.2839	1.33877	2		-1	-1	0	0	2	-1	-1	-1	-1	-1	-1
444.152	108.386	43.12	4	-1	1	271.632	30.7747	1.24687	2		-1	-1	0	0	2	-1	-1	-1	-1	-1	-1
450.449	108.055	43.12	4	-1	1	277.954	30.7971	1.26226	2		-1	-1	0	0	2	-1	-1	-1	-1	-1	-1
501.659	94.1336	45.08	4	-1	1	329.055	28.702	1.77456	2		-1	-1	0	0	2	-1	-1	-1	-1	-1	-1
508.786	93.6365	45.08	4	-1	1	336.186	28.9883	1.79835	2		-1	-1	0	0	2	-1	-1	-1	-1	-1	-1
439.014	91.9792	44.1	4	-1	1	266.278	28.0879	1.80336	2		-1	-1	1	0	-1	-1	-1	-1	-1	-1	-1
429.733	90.8191	44.1	4	-1	1	257.002	28.03	1.84208	2		-1	-1	1	0	-1	-1	-1	-1	-1	-1	-1
493.87	92.9736	44.1	4	-1	1	321.187	29.6401	1.80099	2		-1	-1	0	0	-1	-1	-1	-1	-1	-1	-1
485.915	93.1393	44.1	4	-1	1	313.22	29.3704	1.78909	2		-1	-1	0	0	-1	-1	-1	-1	-1	-1	-1
477.132	93.4707	44.1	4	-1	1	304.43	29.047	1.77132	2		-1	-1	0	0	-1	-1	-1	-1	-1	-1	-1
469.342	93.305	44.1	4	-1	1	296.626	28.8311	1.77163	2		-1	-1	0	0	-1	-1	-1	-1	-1	-1	-1
411.503	90.4876	44.1	4	-1	1	238.832	27.5411	1.85416	2		-1	-1	0	0	-1	-1	-1	-1	-1	-1	-1
402.388	89.3275	44.1	4	-1	1	229.76	27.5751	1.89709	2		-1	-1	0	0	-1	-1	-1	-1	-1	-1	-1
393.439	88.9961	44.1	4	-1	1	220.864	27.426	1.91226	2		-1	-1	0	0	-1	-1	-1	-1	-1	-1	-1
421.447	90.8191	44.1	4	-1	1	248.74	27.7686	1.84167	2		-1	-1	0	0	-1	-1	-1	-1	-1	-1	-1
420.618	88.3332	33.32	3	-1	1	247.572	38.8004	1.84145	2		-1	-1	0	0	2	-1	-1	-1	-1	-1	-1
416.475	89.659	33.32	3	-1	1	243.455	38.3957	1.80795	2		-1	-1	0	0	2	-1	-1	-1	-1	-1	-1
441.003	87.3388	33.32	3	-1	1	267.874	39.6879	1.8675	2		-1	-1	0	0	2	-1	-1	-1	-1	-1	-1
445.478	87.836	33.32	3	-1	1	272.346	39.7126	1.85616	2		-1	-1	0	0	2	-1	-1	-1	-1	-1	-1
451.444	88.8303	33.32	3	-1	1	278.321	39.6812	1.83318	2		-1	-1	0	0	2	-1	-1	-1	-1	-1	-1
457.907	91.3163	33.32	3	-1	1	284.83	39.4229	1.77355	2		-1	-1	0	0	2	-1	-1	-1	-1	-1	-1
463.045	91.1505	33.32	3	-1	1	289.968	39.6132	1.77972	2		-1	-1	0	0	2	-1	-1	-1	-1	-1	-1
467.022	91.1505	33.32	3	-1	1	293.95	39.7393	1.78143	2		-1	-1	0	0	2	-1	-1	-1	-1	-1	-1
472.16	91.1505	33.32	3	-1	1	299.096	39.9012	1.78379	2		-1	-1	0	0	2	-1	-1	-1	-1	-1	-1
675.84	120.484	24.5	2	-1	1	505.206	52.4076	1.32768	2		-1	-1	0	0	-1	-1	-1	-1	-1	-1	-1
652.638	120.484	24.5	2	-1	1	481.842	52.82	1.31067	2		-1	-1	0	0	-1	-1	-1	-1	-1	-1	-1
642.363	119.159	24.5	2	-1	1	471.433	52.5909	1.32699	2		-1	-1	0	0	-1	-1	-1	-1	-1	-1	-1
632.419	118.164	24.5	2	-1	1	461.368	52.444	1.33752	2		-1	-1	0	0	-1	-1	-1	-1	-1	-1	-1
686.281	121.976	24.5	2	-1	1	515.778	52.6305	1.30798	2		-1	-1	0	0	-1	-1	-1	-1	-1	-1	-1
696.556	124.628	24.5	2	-1	1	526.226	53.2448	1.26755	2		-1	-1	0	0	-1	-1	-1	-1	-1	-1	-1
710.974	125.953	24.5	2	-1	1	540.782	53.337	1.25354	2		-1	-1	0	0	-1	-1	-1	-1	-1	-1	-1
725.558	127.114	24.5	2	-1	1	555.491	53.3496	1.24223	2		-1	-1	0	0	-1	-1	-1	-1	-1	-1	-1
741.8	129.599	24.5	2	-1	1	571.912	53.8023	1.20868	2		-1	-1	0	0	-1	-1	-1	-1	-1	-1	-1
763.179	130.262	24.5	2	-1	1	593.41	53.3691	1.20881	2		-1	-1	0	0	-1	-1	-1	-1	-1	-1	-1
540.771	113.192	24.5	2	-1	1	368.671	51.4058	1.35626	2		-1	-1	0	0	-1	-1	-1	-1	-1	-1	-1
534.639	114.352	24.5	2	-1	1	362.521	51.675	1.32976	2		-1	-1	0	0	-1	-1	-1	-1	-1	-1	-1
529.668	113.358	24.5	2	-1	1	357.461	51.3648	1.34441	2		-1	-1	0	0	-1	-1	-1	-1	-1	-1	-1
523.536	114.187	24.5	2	-1	1	351.297	51.5397	1.3242	2		-1	-1	0	0	-1	-1	-1	-1	-1	-1	-1
515.912	113.027	24.5	2	-1	1	343.555	51.1394	1.34006	2		-1	-1	0	0	-1	-1	-1	-1	-1	-1	-1
510.443	113.027	24.5	2	-1	1	338.031	51.0749	1.33595	2		-1	-1	0	0	-1	-1	-1	-1	-1	-1	-1
505.305	113.855	24.5	2	-1	1	332.869	51.246	1.31664	2		-1	-1	0	0	-1	-1	-1	-1	-1	-1	-1
499.174	111.038	24.5	2	-1	1	326.588	50.399	1.36554	2		-1	-1	0	0	-1	-1	-1	-1	-1	-1	-1
492.213	112.198	24.5	2	-1	1	319.597	50.5885	1.33847	2		-1	-1	0	0	-1	-1	-1	-1	-1	-1	-1
484.589	112.364	24.5	2	-1	1	311.906	50.5062	1.33012	2		-1	-1	0	0	-1	-1	-1	-1	-1	-1	-1
477.795	111.867	24.5	2	-1	1	305.036	50.2445	1.33513	2		-1	-1	0	0	-1	-1	-1	-1	-1	-1	-1
456.084	111.701	24.5	2	-1	1	283.141	49.7473	1.32542	2		-1	-1	1	0	-1	-1	-1	-1	-1	-1	-1
401.56	114.85	24.5	2	-1	1	228.317	49.3761	1.24486	2		-1	-1	0	0	-1	-1	-1	-1	-1	-1	-1
405.703	110.209	24.5	2	-1	1	232.477	48.0161	1.33599	2		-1	-1	0	0	-1	-1	-1	-1	-1	-1	-1
412.166	109.381	24.5	2	-1	1	238.957	47.9801	1.3539	2		-1	-1	0	0	-1	-1	-1	-1	-1	-1	-1
416.144	108.221	24.5	2	-1	1	242.941	47.8082	1.3783	2		-1	-1	0	0	-1	-1	-1	-1	-1	-1	-1
420.453	108.386	24.5	2	-1	1	247.264	47.9688	1.37604	2		-1	-1	0	0	-1	-1	-1	-1	-1	-1	-1
424.099	111.369	24.5	2	-1	1	250.946	48.8574	1.31771	2		-1	-1	0	0	-1	-1	-1	-1	-1	-1	-1
427.579	110.209	24.5	2	-1	1	254.434	48.6253	1.34174	2		-1	-1	0	0	-1	-1	-1	-1	-1	-1	-1
432.551	110.209	24.5	2	-1	1	259.431	48.7576	1.34356	2		-1	-1	0	0	-1	-1	-1	-1	-1	-1	-1
438.517	108.883	24.5	2	-1	1	265.412	48.5782	1.37229	2		-1	-1	0	0	-1	-1	-1	-1	-1	-1	-1
442.66	109.049	24.5	2	-1	1	269.581	48.7254	1.37076	2		-1	-1	0	0	-1	-1	-1	-1	-1	-1	-1
446.306	109.049	24.5	2	-1	1	273.248	48.818	1.37241	2		-1	-1	0	0	2	-1	-1	-1	-1	-1	-1
450.284	110.706	22.5534	2	-1	1	277.221	51.2141	1.35189	2		-1	-1	0	0	2	-1	-1	-1	-1	-1	-1
462.879	109.878	24.5	2	-1	1	289.95	49.4154	1.36461	2		-1	-1	0	0	2	-1	-1	-1	-1	-1	-1
471.331	112.198	24.5	2	-1	1	298.524	50.2123	1.32473	2		-1	-1	0	0	2	-1	-1	-1	-1	-1	-1
546.075	114.85	24.5	2	-1	1	374.091	51.879	1.32959	2		-1	-1	0	0	2	-1	-1	-1	-1	-1	-1
554.03	116.507	24.5	2	-1	1	382.192	52.3876	1.30556	2		-1	-1	0	0	2	-1	-1	-1	-1	-1	-1
560.493	115.513	24.5	2	-1	1	388.681	52.1069	1.3289	2		-1	-1	0	0	2	-1	-1	-1	-1	-1	-1
567.785	116.673	24.5	2	-1	1	396.092	52.4437	1.31353	2		-1	-1	0	0	2	-1	-1	-1	-1	-1	-1
580.878	114.352	24.5	2	-1	1	409.215	51.8033	1.36689	2		-1	-1	0	0	2	-1	-1	-1	-1	-1	-1
624.961	118.164	24.5	2	-1	1	453.85	52.5292	1.33173	2		-1	-1	0	0	2	-1	-1	-1	-1	-1	-1
617.006	119.987	24.5	2	-1	1	445.906	53.1584	1.29267	2		-1	-1	0	0	2	-1	-1	-1	-1	-1	-1
610.709	117.336	24.5	2	-1	1	439.442	52.4364	1.33569	2		-1	-1	0	0	2	-1	-1	-1	-1	-1	-1
604.411	117.004	24.5	2	-1	1	433.075	52.3935	1.33676	2		-1	-1	0	0	2	-1	-1	-1	-1	-1	-1
596.787	116.176	24.5	2	-1	1	425.348	52.2168	1.3459	2		-1	-1	0	0	2	-1	-1	-1	-1	-1	-1
394.765	113.855	24.5	2	-1	1	221.502	48.8315	1.26279	2		-1	-1	0	0	2	-1	-1	-1	-1	-1	-1
388.136	114.684	24.5	2	-1	1	214.85	48.9306	1.24633	2		-1	-1	0	0	2	-1	-1	-1	-1	-1	-1
668.382	121.313	24.5	2	-1	1	497.733	52.7913	1.30723	2		-1	-1	0	0	2	-1	-1	-1	-1	-1	-1
660.427	119.822	24.5	2	-1	1	489.659	52.4986	1.32848	2		-1	-1	0	0	2	-1	-1	-1	-1	-1	-1
621.647	74.0805	24.5	2	-1	1	448.637	58.3227	2.13944	2		-1	-1	0	0	2	-1	-1	-1	-1	-1	-1
502.488	127.942	26.5237	2	-1	1	330.52	55.2486	1.05756	2		-1	-1	0	0	2	-1	-1	-1	-1	-1	-1
439.511	123.302	24.5	2	-1	1	266.609	53.9019	1.10997	2		-1	-1	0	0	2	-1	-1	-1	-1	-1	-1
417.635	122.805	24.5	2	-1	1	244.512	53.1799	1.10868	2		-1	-1	0	0	2	-1	-1	-1	-1	-1	-1
406.531	124.793	24.5	2	-1	1	233.315	53.8996	1.07287	2		-1	-1	0	0	2	-1	-1	-1	-1	-1	-1
469.342	97.2825	20.3918	2	-1	1	296.053	52.1764	1.62434	2		-1	-1	0	0	2	-1	-1	-1	-1	-1	-1
488.733	147.001	44.1	2	-1	1	317.597	56.6353	0.581089	2		-1	-1	0	0	2	-1	-1	-1	-1	-1	-1
497.35	147.332	44.1	2	-1	1	326.35	56.8091	0.583683	2		-1	-1	0	0	2	-1	-1	-1	-1	-1	-1
504.643	147.332	44.1	2	-1	1	333.742	56.7012	0.588392	2		-1	-1	0	0	2	-1	-1	-1	-1	-1	-1
514.089	146.504	44.1	2	-1	1	343.283	55.8396	0.602222	2		-1	-1	0	0	2	-1	-1	-1	-1	-1	-1
467.354	146.007	44.1	2	-1	1	295.856	55.967	0.576172	2		-1	-1	0	0	2	-1	-1	-1	-1	-1	-1
456.416	145.675	44.1	2	-1	1	284.727	55.7253	0.572148	2		-1	-1	0	0	2	-1	-1	-1	-1	-1	-1
485.418	126.948	43.12	3	-1	1	313.64	41.4374	0.849248	2		-1	-1	0	0	2	-1	-1	-1	-1	-1	-1
469.342	125.456	43.12	3	-1	1	297.357	40.3815	0.860963	2		-1	-1	0	0	2	-1	-1	-1	-1	-1	-1
463.708	125.125	43.12	3	-1	1	291.656	40.1265	0.861919	2		-1	-1	0	0	2	-1	-1	-1	-1	-1	-1
459.564	124.959	43.12	3	-1	1	287.466	39.9866	0.861284	2		-1	-1	0	0	2	-1	-1	-1	-1	-1	-1
449.952	124.628	43.12	3	-1	1	277.746	39.6802	0.859113	2		-1	-1	0	0	2	-1	-1	-1	-1	-1	-1
444.815	123.468	43.12	3	-1	1	272.536	38.8382	0.876539	2		-1	-1	0	0	2	-1	-1	-1	-1	-1	-1
438.848	123.468	43.12	3	-1	1	266.51	38.7647	0.871735	2		-1	-1	0	0	2	-1	-1	-1	-1	-1	-1
518.729	128.274	43.12	3	-1	1	347.322	42.1936	0.857458	2		-1	-1	0	0	2	-1	-1	-1	-1	-1	-1
511.603	127.942	43.12	3	-1	1	340.117	42.0222	0.856488	2		-1	-1	0	0	2	-1	-1	-1	-1	-1	-1
537.457	128.605	43.12	3	-1	1	366.227	42.2196	0.869211	2		-1	-1	0	0	2	-1	-1	-1	-1	-1	-1
572.591	130.594	43.12	3	-1	1	401.711	42.997	0.866501	2		-1	-1	0	0	2	-1	-1	-1	-1	-1	-1
586.181	129.931	42.14	3	-1	1	415.357	43.0117	0.904772	2		-1	-1	0	0	2	-1	-1	-1	-1	-1	-1
595.959	130.262	42.14	3	-1	1	425.211	43.0161	0.907133	2		-1	-1	0	0	2	-1	-1	-1	-1	-1	-1
482.435	140.538	71.54	3	-1	1	311.753	42.3697	0.0767283	2		-1	-1	0	0	2	-1	-1	-1	-1	-1	-1
474.811	139.212	71.54	3	-1	1	304.016	41.2397	0.0726707	2		-1	-1	0	0	2	-1	-1	-1	-1	-1	-1
469.177	140.04	71.54	3	-1	1	298.34	42.2022	0.0683131	2		-1	-1	0	0	2	-1	-1	-1	-1	-1	-1
442.329	136.56	71.54	3	-1	1	271.088	39.2387	0.050157	2		-1	-1	1	0	-1	-1	-1	-1	-1	-1	-1
371.397	134.571	71.54	3	-1	1	199.037	37.3582	-0.00584674	2		-1	-1	1	0	-1	-1	-1	-1	-1	-1	-1
380.181	134.903	71.54	3	-1	1	207.964	37.7891	0.00106072	2		-1	-1	0	0	-1	-1	-1	-1	-1	-1	-1
386.147	135.4	71.54	3	-1	1	214.027	38.3345	0.00606004	2		-1	-1	0	0	-1	-1	-1	-1	-1	-1	-1
391.947	135.897	71.54	3	-1	1	219.923	38.8639	0.0108836	2		-1	-1	0	0	-1	-1	-1	-1	-1	-1	-1
396.753	135.731	71.54	3	-1	1	224.811	38.7143	0.0144131	2		-1	-1	0	0	-1	-1	-1	-1	-1	-1	-1
401.725	135.731	71.54	3	-1	1	229.865	38.7208	0.0182477	2		-1	-1	0	0	-1	-1	-1	-1	-1	-1	-1
405.868	136.229	71.54	3	-1	1	234.077	39.2154	0.0217465	2		-1	-1	0	0	-1	-1	-1	-1	-1	-1	-1
410.343	137.223	71.54	3	-1	1	238.627	40.1991	0.0256536	2		-1	-1	0	0	-1	-1	-1	-1	-1	-1	-1
416.475	137.554	71.54	3	-1	1	244.861	40.5032	0.0304142	2		-1	-1	0	0	-1	-1	-1	-1	-1	-1	-1
423.933	137.554	71.54	3	-1	1	252.437	40.4504	0.0360584	2		-1	-1	0	0	-1	-1	-1	-1	-1	-1	-1
430.231	137.389	71.54	3	-1	1	258.829	40.2238	0.0408247	2		-1	-1	0	0	-1	-1	-1	-1	-1	-1	-1
436.694	136.394	71.54	3	-1	1	265.374	39.1522	0.045801	2		-1	-1	0	0	-1	-1	-1	-1	-1	-1	-1
450.284	137.72	71.54	3	-1	1	279.167	40.2689	0.0559168	2		-1	-1	0	0	-1	-1	-1	-1	-1	-1	-1
457.907	138.549	71.54	3	-1	1	286.903	40.9542	0.0611952	2		-1	-1	0	0	-1	-1	-1	-1	-1	-1	-1
462.879	139.046	71.54	3	-1	1	291.946	41.3485	0.0645047	2		-1	-1	0	0	-1	-1	-1	-1	-1	-1	-1
367.917	134.074	71.54	3	-1	1	195.506	36.8128	-0.00906945	2		-1	-1	0	0	-1	-1	-1	-1	-1	-1	-1
359.299	133.577	71.54	3	-1	1	186.756	36.1724	-0.0160513	2		-1	-1	0	0	-1	-1	-1	-1	-1	-1	-1
352.007	133.577	71.54	3	-1	1	179.346	36.0248	-0.0211537	2		-1	-1	0	0	-1	-1	-1	-1	-1	-1	-1
500.002	141.532	71.54	3	-1	1	329.51	42.8632	0.0866232	2		-1	-1	0	0	-1	-1	-1	-1	-1	-1	-1
506.797	141.532	71.54	3	-1	1	336.359	42.653	0.0905267	2		-1	-1	0	0	-1	-1	-1	-1	-1	-1	-1
517.901	141.366	71.54	3	-1	1	347.534	42.1264	0.0968235	2		-1	-1	0	0	-1	-1	-1	-1	-1	-1	-1
525.193	142.692	71.54	3	-1	1	354.917	43.2014	0.0988792	2		-1	-1	0	0	-1	-1	-1	-1	-1	-1	-1
533.976	141.532	71.54	3	-1	1	363.706	41.735	0.104736	2		-1	-1	0	0	-1	-1	-1	-1	-1	-1	-1
542.263	143.189	71.54	3	-1	1	372.093	43.0873	0.106077	2		-1	-1	0	0	-1	-1	-1	-1	-1	-1	-1
552.869	142.195	71.54	3	-1	1	382.703	41.6996	0.112032	2		-1	-1	0	0	-1	-1	-1	-1	-1	-1	-1
560.162	142.361	71.54	3	-1	1	390.026	41.5859	0.114585	2		-1	-1	0	0	-1	-1	-1	-1	-1	-1	-1
569.774	143.189	71.54	3	-1	1	399.697	42.0369	0.116531	2		-1	-1	0	0	-1	-1	-1	-1	-1	-1	-1
578.392	143.355	71.54	3	-1	1	408.341	41.86	0.118923	2		-1	-1	0	0	-1	-1	-1	-1	-1	-1	-1
588.335	144.018	71.54	3	-1	1	418.329	42.1198	0.120423	2		-1	-1	0	0	-1	-1	-1	-1	-1	-1	-1
595.627	144.515	71.54	3	-1	1	425.652	42.3177	0.121215	2		-1	-1	0	0	-1	-1	-1	-1	-1	-1	-1
697.55	152.139	71.54	3	-1	1	527.838	45.6384	0.108933	2		-1	-1	0	0	-1	-1	-1	-1	-1	-1	-1
682.138	147.83	71.54	3	-1	1	512.272	41.9903	0.118397	2		-1	-1	0	0	-1	-1	-1	-1	-1	-1	-1
662.582	147.498	71.54	3	-1	1	492.727	42.4849	0.120875	2		-1	-1	0	0	-1	-1	-1	-1	-1	-1	-1
714.123	152.47	71.54	3	-1	1	544.393	45.2799	0.104946	2		-1	-1	0	0	-1	-1	-1	-1	-1	-1	-1
728.541	154.459	71.54	3	-1	1	558.861	46.6702	0.098597	2		-1	-1	0	0	-1	-1	-1	-1	-1	-1	-1
726.055	144.515	69.58	4	-1	1	556.011	37.0493	0.16747	2		-1	-1	0	0	2	-1	-1	-1	-1	-1	-1
717.935	143.023	69.58	4	-1	1	547.843	35.9114	0.174776	2		-1	-1	0	0	2	-1	-1	-1	-1	-1	-1
691.75	137.72	73.5	4	-1	1	521.433	31.3917	0.0786116	2		-1	-1	0	0	2	-1	-1	-1	-1	-1	-1
686.281	138.549	73.5	4	-1	1	516.007	32.4471	0.0790813	2		-1	-1	0	0	2	-1	-1	-1	-1	-1	-1
677.663	138.383	73.5	4	-1	1	507.395	32.6422	0.0811641	2		-1	-1	0	0	2	-1	-1	-1	-1	-1	-1
667.553	136.892	73.5	4	-1	1	497.237	31.5778	0.084795	2		-1	-1	0	0	2	-1	-1	-1	-1	-1	-1
615.349	131.92	74.48	4	-1	1	444.865	28.7823	0.0586027	2		-1	-1	0	0	2	-1	-1	-1	-1	-1	-1
609.051	130.925	74.48	4	-1	1	438.527	28.0529	0.0583288	2		-1	-1	0	0	2	-1	-1	-1	-1	-1	-1
660.593	135.897	74.48	4	-1	1	490.238	30.8505	0.0553325	2		-1	-1	1	0	-1	-1	-1	-1	-1	-1	-1
646.34	135.4	74.48	4	-1	1	475.981	30.9538	0.0572047	2		-1	-1	0	0	-1	-1	-1	-1	-1	-1	-1
636.562	135.731	74.48	4	-1	1	466.226	31.6972	0.0575254	2		-1	-1	0	0	-1	-1	-1	-1	-1	-1	-1
628.276	132.748	74.48	4	-1	1	457.82	29.0664	0.0590288	2		-1	-1	0	0	-1	-1	-1	-1	-1	-1	-1
625.79	138.383	74.48	4	-1	1	455.573	34.8003	0.0563264	2		-1	-1	0	0	-1	-1	-1	-1	-1	-1	-1
623.138	132.251	74.48	4	-1	1	452.664	28.7861	0.059078	2		-1	-1	0	0	-1	-1	-1	-1	-1	-1	-1
617.669	137.389	74.48	4	-1	1	447.414	34.1485	0.0562808	2		-1	-1	0	0	-1	-1	-1	-1	-1	-1	-1
610.709	136.56	74.48	4	-1	1	440.421	33.6127	0.0559485	2		-1	-1	0	0	-1	-1	-1	-1	-1	-1	-1
603.085	135.897	74.48	4	-1	1	432.77	33.2691	0.0551732	2		-1	-1	0	0	-1	-1	-1	-1	-1	-1	-1
545.743	133.411	72.52	4	-1	1	375.228	33.1463	0.0969353	2		-1	-1	0	0	-1	-1	-1	-1	-1	-1	-1
536.96	133.411	72.52	4	-1	1	366.416	33.47	0.0921089	2		-1	-1	0	0	-1	-1	-1	-1	-1	-1	-1
554.361	134.24	72.52	4	-1	1	383.901	33.6475	0.0999194	2		-1	-1	0	0	-1	-1	-1	-1	-1	-1	-1
562.647	133.743	72.52	4	-1	1	392.187	32.8319	0.104647	2		-1	-1	0	0	-1	-1	-1	-1	-1	-1	-1
601.428	130.76	72.52	4	-1	1	430.888	28.3015	0.126413	2		-1	-1	0	0	-1	-1	-1	-1	-1	-1	-1
595.296	130.262	72.52	4	-1	1	424.733	28.0579	0.125912	2		-1	-1	0	0	-1	-1	-1	-1	-1	-1	-1
587.009	129.434	72.52	4	-1	1	416.407	27.5697	0.125287	2		-1	-1	0	0	-1	-1	-1	-1	-1	-1	-1
578.392	128.771	72.52	4	-1	1	407.754	27.2556	0.123523	2		-1	-1	0	0	-1	-1	-1	-1	-1	-1	-1
561.653	127.114	72.52	4	-1	1	390.927	26.262	0.119551	2		-1	-1	1	0	-1	-1	-1	-1	-1	-1	-1
465.033	121.81	53.9	4	-1	1	293.229	30.3941	0.700291	2		-1	-1	0	0	2	-1	-1	-1	-1	-1	-1
470.834	122.805	53.9	4	-1	1	299.102	31.1766	0.687625	2		-1	-1	0	0	2	-1	-1	-1	-1	-1	-1
478.457	122.97	53.9	4	-1	1	306.793	31.2816	0.693476	2		-1	-1	0	0	2	-1	-1	-1	-1	-1	-1
485.087	122.639	53.9	4	-1	1	313.466	30.9846	0.707967	2		-1	-1	0	0	2	-1	-1	-1	-1	-1	-1
492.379	122.307	53.9	4	-1	1	320.805	30.6775	0.723623	2		-1	-1	0	0	2	-1	-1	-1	-1	-1	-1
500.831	122.473	53.9	4	-1	1	329.324	30.7362	0.730729	2		-1	-1	0	0	2	-1	-1	-1	-1	-1	-1
508.289	122.805	53.9	4	-1	1	336.845	30.9166	0.733167	2		-1	-1	0	0	2	-1	-1	-1	-1	-1	-1
516.078	124.628	53.9	4	-1	1	344.749	32.2405	0.706451	2		-1	-1	0	0	2	-1	-1	-1	-1	-1	-1
413.492	119.49	51.94	4	-1	1	241.157	29.3968	0.745017	2		-1	-1	0	0	2	-1	-1	-1	-1	-1	-1
405.703	119.159	51.94	4	-1	1	233.304	29.005	0.745839	2		-1	-1	0	0	2	-1	-1	-1	-1	-1	-1
327.148	71.7051	59.78	4	-1	1	155.988	28.0711	2.86041	2		-1	-1	0	0	-1	-1	-1	-1	-1	-1	-1
361.619	67.7276	59.78	4	-1	1	190.062	31.2264	2.86938	2		-1	-1	0	0	2	-1	-1	-1	-1	-1	-1
361.619	72.147	59.78	4	-1	1	189.981	27.0601	2.81874	2		-1	-1	0	0	2	-1	-1	-1	-1	-1	-1
367.806	71.7051	59.78	4	-1	1	196.094	27.4292	2.81782	2		-1	-1	0	0	2	-1	-1	-1	-1	-1	-1
389.903	66.4018	59.78	4	-1	1	217.938	32.3933	2.85659	2		-1	-1	0	0	2	-1	-1	-1	-1	-1	-1
395.207	65.9598	59.78	4	-1	1	223.165	32.8358	2.85629	2		-1	-1	0	0	2	-1	-1	-1	-1	-1	-1
341.29	73.4729	59.78	4	-1	1	169.888	26.0933	2.82361	2		-1	-1	0	0	2	-1	-1	-1	-1	-1	-1
340.848	67.7276	59.78	4	-1	1	169.609	31.5408	2.88837	2		-1	-1	0	0	2	-1	-1	-1	-1	-1	-1
335.544	73.9148	59.78	4	-1	1	164.204	25.7929	2.82405	2		-1	-1	0	0	2	-1	-1	-1	-1	-1	-1
321.402	71.7051	59.78	4	-1	1	150.322	28.2282	2.86598	2		-1	-1	0	0	2	-1	-1	-1	-1	-1	-1
314.331	73.0309	59.78	4	-1	1	143.296	27.1855	2.85763	2		-1	-1	0	0	2	-1	-1	-1	-1	-1	-1
308.144	73.9148	59.78	4	-1	1	137.154	26.5543	2.85305	2		-1	-1	0	0	2	-1	-1	-1	-1	-1	-1
412	65.5179	61.74	4	-1	1	239.779	32.8133	2.90283	2		-1	-1	0	0	2	-1	-1	-1	-1	-1	-1
419.513	67.2857	61.74	4	-1	1	247.202	31.2206	2.88043	2		-1	-1	0	0	2	-1	-1	-1	-1	-1	-1
427.91	67.2857	61.74	4	-1	1	255.497	31.3609	2.87335	2		-1	-1	0	0	2	-1	-1	-1	-1	-1	-1
425.701	71.7051	61.74	4	-1	1	253.352	27.146	2.82553	2		-1	-1	0	0	2	-1	-1	-1	-1	-1	-1
418.63	71.7051	61.74	4	-1	1	246.355	27.0229	2.83226	2		-1	-1	0	0	2	-1	-1	-1	-1	-1	-1
411.559	71.7051	61.74	4	-1	1	239.361	26.9201	2.83927	2		-1	-1	0	0	2	-1	-1	-1	-1	-1	-1
488.456	73.0309	62.72	4	-1	1	315.674	27.3399	2.796	2		-1	-1	0	0	3	-1	-1	-1	-1	-1	-1
486.689	67.2857	62.72	4	-1	1	313.756	32.6645	2.86349	2		-1	-1	0	0	3	-1	-1	-1	-1	-1	-1
478.734	67.2857	62.72	4	-1	1	305.858	32.3956	2.86754	2		-1	-1	0	0	3	-1	-1	-1	-1	-1	-1
470.779	67.2857	62.72	4	-1	1	297.965	32.1404	2.87205	2		-1	-1	0	0	3	-1	-1	-1	-1	-1	-1
465.033	67.2857	62.72	4	-1	1	292.268	31.9656	2.87558	2		-1	-1	0	0	3	-1	-1	-1	-1	-1	-1
573.309	72.147	62.72	4	-1	1	400.272	31.5441	2.79664	2		-1	-1	0	0	3	-1	-1	-1	-1	-1	-1
571.1	67.2857	62.72	4	-1	1	397.868	35.9952	2.84743	2		-1	-1	0	0	3	-1	-1	-1	-1	-1	-1
576.845	66.8437	62.72	4	-1	1	403.591	36.6514	2.85193	2		-1	-1	0	0	3	-1	-1	-1	-1	-1	-1
579.496	74.3567	62.72	4	-1	1	406.547	29.767	2.76979	2		-1	-1	0	0	3	-1	-1	-1	-1	-1	-1
584.358	68.1696	62.72	4	-1	1	411.154	35.7141	2.84073	2		-1	-1	0	0	3	-1	-1	-1	-1	-1	-1
590.545	69.4954	62.72	4	-1	1	417.395	34.7257	2.82897	2		-1	-1	0	0	3	-1	-1	-1	-1	-1	-1
615.294	73.4729	62.72	4	-1	1	442.321	32.0321	2.79322	2		-1	-1	0	0	3	-1	-1	-1	-1	-1	-1
601.152	74.7987	62.72	4	-1	1	428.225	30.2456	2.77087	2		-1	-1	0	0	3	-1	-1	-1	-1	-1	-1
593.639	73.4729	62.72	4	-1	1	420.654	31.1575	2.7853	2		-1	-1	0	0	3	-1	-1	-1	-1	-1	-1
587.009	74.3567	62.72	4	-1	1	414.06	30.0752	2.77188	2		-1	-1	0	0	3	-1	-1	-1	-1	-1	-1
456.195	66.4018	62.72	4	-1	1	283.492	32.5583	2.88956	2		-1	-1	0	0	-1	-1	-1	-1	-1	-1	-1
450.891	66.4018	62.72	4	-1	1	278.242	32.4192	2.89325	2		-1	-1	0	0	-1	-1	-1	-1	-1	-1	-1
442.936	66.8437	62.72	4	-1	1	270.378	31.8036	2.89518	2		-1	-1	0	0	-1	-1	-1	-1	-1	-1	-1
436.749	66.8437	62.72	4	-1	1	264.259	31.6685	2.90002	2		-1	-1	0	0	-1	-1	-1	-1	-1	-1	-1
435.423	72.147	62.72	4	-1	1	263.012	26.5924	2.84517	2		-1	-1	0	0	-1	-1	-1	-1	-1	-1	-1
443.82	72.589	62.72	4	-1	1	271.339	26.3718	2.83204	2		-1	-1	0	0	-1	-1	-1	-1	-1	-1	-1
451.333	72.147	62.72	4	-1	1	278.781	26.9806	2.83156	2		-1	-1	0	0	-1	-1	-1	-1	-1	-1	-1
458.404	73.4729	62.72	4	-1	1	285.822	25.9417	2.80819	2		-1	-1	0	0	-1	-1	-1	-1	-1	-1	-1
467.243	72.147	62.72	4	-1	1	294.568	27.4453	2.81997	2		-1	-1	0	0	-1	-1	-1	-1	-1	-1	-1
473.43	73.4729	62.72	4	-1	1	300.746	26.4118	2.79793	2		-1	-1	0	0	-1	-1	-1	-1	-1	-1	-1
495.527	67.7276	62.72	4	-1	1	322.552	32.5594	2.85517	2		-1	-1	0	0	-1	-1	-1	-1	-1	-1	-1
503.482	67.2857	62.72	4	-1	1	330.449	33.2704	2.85642	2		-1	-1	0	0	-1	-1	-1	-1	-1	-1	-1
511.879	66.4018	62.72	4	-1	1	338.774	34.4257	2.862	2		-1	-1	0	0	-1	-1	-1	-1	-1	-1	-1
519.834	67.7276	62.72	4	-1	1	346.739	33.4818	2.84715	2		-1	-1	0	0	-1	-1	-1	-1	-1	-1	-1
529.557	66.4018	62.72	4	-1	1	356.379	35.1209	2.8577	2		-1	-1	0	0	-1	-1	-1	-1	-1	-1	-1
538.396	66.8437	62.72	4	-1	1	365.206	35.0605	2.85226	2		-1	-1	0	0	-1	-1	-1	-1	-1	-1	-1
547.677	69.4954	62.72	4	-1	1	374.565	32.9485	2.82504	2		-1	-1	0	0	-1	-1	-1	-1	-1	-1	-1
554.748	69.9373	62.72	4	-1	1	381.641	32.8277	2.8202	2		-1	-1	0	0	-1	-1	-1	-1	-1	-1	-1
559.609	70.3793	62.72	4	-1	1	386.513	32.6171	2.81551	2		-1	-1	0	0	-1	-1	-1	-1	-1	-1	-1
566.238	71.7051	62.72	4	-1	1	393.188	31.6601	2.8009	2		-1	-1	0	0	-1	-1	-1	-1	-1	-1	-1
542.815	72.589	62.72	4	-1	1	369.83	29.8746	2.78886	2		-1	-1	0	0	-1	-1	-1	-1	-1	-1	-1
497.295	73.0309	63.7	4	-1	1	324.493	27.3042	2.82533	2		-1	-1	0	0	-1	-1	-1	-1	-1	-1	-1
504.366	72.147	63.7	4	-1	1	331.504	28.3966	2.83346	2		-1	-1	0	0	-1	-1	-1	-1	-1	-1	-1
512.763	72.589	63.7	4	-1	1	339.881	28.3047	2.82512	2		-1	-1	0	0	-1	-1	-1	-1	-1	-1	-1
520.718	72.589	63.7	4	-1	1	347.807	28.6172	2.82292	2		-1	-1	0	0	-1	-1	-1	-1	-1	-1	-1
528.231	72.589	63.7	4	-1	1	355.297	28.9175	2.82133	2		-1	-1	0	0	-1	-1	-1	-1	-1	-1	-1
536.628	73.4729	63.7	4	-1	1	363.705	28.4345	2.809	2		-1	-1	0	0	-1	-1	-1	-1	-1	-1	-1
381.506	66.4018	62.72	4	-1	1	209.747	31.5779	2.95254	2		-1	-1	0	0	-1	-1	-1	-1	-1	-1	-1
373.993	65.9598	62.72	4	-1	1	202.352	32.0461	2.9625	2		-1	-1	0	0	-1	-1	-1	-1	-1	-1	-1
381.506	70.8212	62.72	4	-1	1	209.704	27.2962	2.91528	2		-1	-1	0	0	-1	-1	-1	-1	-1	-1	-1
389.903	70.8212	62.72	4	-1	1	217.994	27.2958	2.90632	2		-1	-1	0	0	-1	-1	-1	-1	-1	-1	-1
396.532	70.8212	62.72	4	-1	1	224.541	27.3193	2.8993	2		-1	-1	0	0	-1	-1	-1	-1	-1	-1	-1
406.255	71.2632	62.72	4	-1	1	234.147	26.968	2.88439	2		-1	-1	0	0	-1	-1	-1	-1	-1	-1	-1
373.993	71.2632	62.72	4	-1	1	202.283	26.8989	2.91905	2		-1	-1	0	0	-1	-1	-1	-1	-1	-1	-1
354.106	72.589	62.72	4	-1	1	182.627	25.8253	2.92775	2		-1	-1	0	0	-1	-1	-1	-1	-1	-1	-1
353.664	66.4018	62.72	4	-1	1	182.326	31.8543	2.97749	2		-1	-1	0	0	-1	-1	-1	-1	-1	-1	-1
347.477	72.589	62.72	4	-1	1	176.082	25.9371	2.9349	2		-1	-1	0	0	-1	-1	-1	-1	-1	-1	-1
347.477	68.1696	62.72	4	-1	1	176.19	30.238	2.97101	2		-1	-1	0	0	-1	-1	-1	-1	-1	-1	-1
478.734	88.9408	57.82	6	-1	1	306.286	17.5716	2.16021	2		-1	-1	1	0	-1	-1	-1	-1	-1	-1	-1
486.247	104.409	57.82	6	-1	1	314.223	16.4063	1.23094	2		-1	-1	1	0	-1	-1	-1	-1	-1	-1	-1
507.902	103.525	57.82	6	-1	1	335.911	16.3978	1.33032	2		-1	-1	1	0	-1	-1	-1	-1	-1	-1	-1
528.231	103.083	57.82	6	-1	1	356.279	16.5296	1.40381	2		-1	-1	1	0	-1	-1	-1	-1	-1	-1	-1
473.872	80.5439	57.82	5	-1	1	301.224	22.8941	2.47733	2		-1	-1	1	0	-1	-1	-1	-1	-1	-1	-1
450.007	80.5439	57.82	5	-1	1	277.467	22.0673	2.48599	2		-1	-1	1	0	-1	-1	-1	-1	-1	-1	-1
488.014	80.5439	57.82	5	-1	1	315.32	23.4232	2.47551	2		-1	-1	1	0	-1	-1	-1	-1	-1	-1	-1
515.857	80.9859	57.82	5	-1	1	343.121	24.1761	2.46639	2		-1	-1	1	0	-1	-1	-1	-1	-1	-1	-1
550.328	78.7762	49	4	-1	1	377.361	33.3501	2.32077	2		-1	-1	1	0	-1	-1	-1	-1	-1	-1	-1
514.531	79.2181	49	4	-1	1	341.547	31.7318	2.29257	2		-1	-1	1	0	-1	-1	-1	-1	-1	-1	-1
506.576	77.4503	49	4	-1	1	333.538	32.5637	2.332	2		-1	-1	1	0	-1	-1	-1	-1	-1	-1	-1
462.382	80.102	49	4	-1	1	289.519	29.2433	2.25871	2		-1	-1	1	0	-1	-1	-1	-1	-1	-1	-1
450.891	79.66	49	4	-1	1	278.071	29.1091	2.27162	2		-1	-1	1	0	-1	-1	-1	-1	-1	-1	-1
560.051	109.712	45.08	4	-1	1	388.275	30.7265	1.32116	2		-1	-1	0	0	-1	-1	-1	-1	-1	-1	-1
548.119	111.038	45.08	4	-1	1	376.327	31.131	1.26449	2		-1	-1	0	0	-1	-1	-1	-1	-1	-1	-1
537.954	110.596	45.08	4	-1	1	366.086	30.9556	1.26435	2		-1	-1	0	0	-1	-1	-1	-1	-1	-1	-1
526.021	109.27	46.06	4	-1	1	354.055	29.5271	1.27871	2		-1	-1	0	0	-1	-1	-1	-1	-1	-1	-1
516.741	110.596	46.06	4	-1	1	344.767	29.9362	1.22458	2		-1	-1	0	0	-1	-1	-1	-1	-1	-1	-1
507.902	111.922	46.06	4	-1	1	335.92	30.414	1.17284	2		-1	-1	0	0	-1	-1	-1	-1	-1	-1	-1
494.644	110.596	46.06	4	-1	1	322.539	29.7497	1.19594	2		-1	-1	0	0	-1	-1	-1	-1	-1	-1	-1
484.037	108.386	46.06	4	-1	1	311.808	28.7756	1.25259	2		-1	-1	0	0	-1	-1	-1	-1	-1	-1	-1
475.198	109.712	46.06	4	-1	1	302.955	29.1464	1.1997	2		-1	-1	0	0	-1	-1	-1	-1	-1	-1	-1
465.033	109.27	46.06	4	-1	1	292.724	28.8063	1.20209	2		-1	-1	0	0	-1	-1	-1	-1	-1	-1	-1
461.498	110.154	46.06	4	-1	1	289.188	29.1131	1.17047	2		-1	-1	0	0	-1	-1	-1	-1	-1	-1	-1
572.867	111.922	46.06	4	-1	1	401.261	30.4803	1.26011	2		-1	-1	0	0	2	-1	-1	-1	-1	-1	-1
583.474	113.248	46.06	4	-1	1	411.977	30.8956	1.2342	2		-1	-1	0	0	2	-1	-1	-1	-1	-1	-1
594.081	112.364	46.06	4	-1	1	422.6	30.5063	1.27543	2		-1	-1	0	0	2	-1	-1	-1	-1	-1	-1
604.245	112.806	46.06	4	-1	1	432.832	30.5663	1.27552	2		-1	-1	0	0	2	-1	-1	-1	-1	-1	-1
613.968	114.132	46.06	4	-1	1	442.656	30.9173	1.24797	2		-1	-1	0	0	2	-1	-1	-1	-1	-1	-1
628.552	115.457	46.06	4	-1	1	457.36	31.1998	1.22701	2		-1	-1	0	0	2	-1	-1	-1	-1	-1	-1
668.327	118.109	46.06	4	-1	1	497.401	31.4653	1.1969	2		-1	-1	0	0	2	-1	-1	-1	-1	-1	-1
640.926	116.783	46.06	4	-1	1	469.842	31.502	1.20333	2		-1	-1	0	0	3	-1	-1	-1	-1	-1	-1
652.859	116.341	46.06	4	-1	1	481.803	31.1046	1.23075	2		-1	-1	0	0	3	-1	-1	-1	-1	-1	-1
680.259	120.319	46.06	4	-1	1	509.466	32.1165	1.14709	2		-1	-1	0	0	-1	-1	-1	-1	-1	-1	-1
693.959	121.203	46.06	4	-1	1	523.245	32.1449	1.13654	2		-1	-1	0	0	-1	-1	-1	-1	-1	-1	-1
707.218	124.296	46.06	4	-1	1	536.668	33.2616	1.06636	2		-1	-1	0	0	-1	-1	-1	-1	-1	-1	-1
721.36	125.622	46.06	4	-1	1	550.899	33.4982	1.04429	2		-1	-1	0	0	-1	-1	-1	-1	-1	-1	-1
733.292	126.506	46.06	4	-1	1	562.893	33.5659	1.03124	2		-1	-1	0	0	-1	-1	-1	-1	-1	-1	-1
745.667	131.809	46.06	4	-1	1	575.502	36.2716	0.917052	2		-1	-1	0	0	2	-1	-1	-1	-1	-1	-1
759.367	131.367	46.06	4	-1	1	589.207	35.4544	0.933668	2		-1	-1	0	0	2	-1	-1	-1	-1	-1	-1
773.951	132.251	46.06	4	-1	1	603.845	35.4287	0.921412	2		-1	-1	0	0	2	-1	-1	-1	-1	-1	-1
790.745	134.461	46.06	4	-1	1	620.742	36.1741	0.881411	2		-1	-1	0	0	2	-1	-1	-1	-1	-1	-1
807.98	131.367	46.06	4	-1	1	637.879	33.4665	0.956335	2		-1	-1	0	0	2	-1	-1	-1	-1	-1	-1
826.1	129.599	46.06	4	-1	1	655.949	31.6567	1.00815	2		-1	-1	0	0	2	-1	-1	-1	-1	-1	-1
724.012	84.9634	46.06	4	-1	1	551.91	36.1677	2.29107	2		-1	-1	0	0	2	-1	-1	-1	-1	-1	-1
757.157	88.4989	46.06	4	-1	1	585.313	34.374	2.25117	2		-1	-1	0	0	2	-1	-1	-1	-1	-1	-1
689.54	86.2892	46.06	4	-1	1	517.361	34.8607	2.22228	2		-1	-1	0	0	2	-1	-1	-1	-1	-1	-1
738.596	86.7311	46.06	4	-1	1	566.618	35.259	2.26908	2		-1	-1	0	0	3	-1	-1	-1	-1	-1	-1
568.89	64.1921	53.9	3	-1	1	395.433	42.3697	2.67407	2		-1	-1	0	0	2	-1	-1	-1	-1	-1	-1
597.616	65.076	53.9	3	-1	1	424.228	42.7487	2.67214	2		-1	-1	0	0	2	-1	-1	-1	-1	-1	-1
606.013	65.076	53.9	3	-1	1	432.641	43.0763	2.6752	2		-1	-1	0	0	2	-1	-1	-1	-1	-1	-1
618.387	65.076	53.9	3	-1	1	445.042	43.551	2.68014	2		-1	-1	0	0	2	-1	-1	-1	-1	-1	-1
630.32	65.9598	53.9	3	-1	1	457.042	43.2258	2.67558	2		-1	-1	0	0	2	-1	-1	-1	-1	-1	-1
639.159	65.9598	53.9	3	-1	1	465.904	43.5495	2.67985	2		-1	-1	0	0	2	-1	-1	-1	-1	-1	-1
652.417	65.9598	53.9	3	-1	1	479.201	44.0242	2.68664	2		-1	-1	0	0	2	-1	-1	-1	-1	-1	-1
659.93	65.9598	53.9	3	-1	1	486.737	44.2873	2.69068	2		-1	-1	0	0	2	-1	-1	-1	-1	-1	-1
776.161	70.8212	53.9	3	-1	1	603.531	43.4335	2.72087	2		-1	-1	0	0	2	-1	-1	-1	-1	-1	-1
484.037	61.9824	53.9	3	-1	1	310.749	40.9283	2.70031	2		-1	-1	0	0	2	-1	-1	-1	-1	-1	-1
473.872	62.8663	53.9	3	-1	1	300.685	39.7879	2.69296	2		-1	-1	0	0	2	-1	-1	-1	-1	-1	-1
465.917	63.7501	53.9	3	-1	1	292.818	38.7414	2.68496	2		-1	-1	0	0	2	-1	-1	-1	-1	-1	-1
458.846	63.7501	53.9	3	-1	1	285.812	38.5129	2.6877	2		-1	-1	0	0	2	-1	-1	-1	-1	-1	-1
453.101	63.3082	53.9	3	-1	1	280.116	38.7253	2.69559	2		-1	-1	0	0	2	-1	-1	-1	-1	-1	-1
430.12	63.3082	51.94	3	-1	1	257.346	39.0517	2.66284	2		-1	-1	0	0	2	-1	-1	-1	-1	-1	-1
425.701	63.3082	51.94	3	-1	1	252.986	38.949	2.66528	2		-1	-1	0	0	2	-1	-1	-1	-1	-1	-1
419.513	63.3082	51.94	3	-1	1	246.884	38.8166	2.66887	2		-1	-1	0	0	2	-1	-1	-1	-1	-1	-1
415.094	65.076	51.94	3	-1	1	242.536	37.201	2.64822	2		-1	-1	0	0	2	-1	-1	-1	-1	-1	-1
401.394	61.9824	51.94	3	-1	1	229.039	39.6783	2.69663	2		-1	-1	0	0	2	-1	-1	-1	-1	-1	-1
397.416	62.8663	48.5656	3	-1	1	225.028	40.5662	2.61553	2		-1	-1	0	0	2	-1	-1	-1	-1	-1	-1
267.043	73.4729	52.92	3	-1	1	96.566	31.4385	2.68102	2		-1	-1	0	0	2	-1	-1	-1	-1	-1	-1
261.74	74.7987	52.92	3	-1	1	91.2617	30.5372	2.66513	2		-1	-1	0	0	2	-1	-1	-1	-1	-1	-1
258.205	74.3567	52.92	3	-1	1	87.799	31.0961	2.67554	2		-1	-1	0	0	2	-1	-1	-1	-1	-1	-1
252.459	75.2406	52.92	3	-1	1	82.0789	30.6214	2.66686	2		-1	-1	0	0	2	-1	-1	-1	-1	-1	-1
202.078	85.8472	52.92	3	-1	1	31.5762	24.7978	2.50882	2		-1	-1	0	0	2	-1	-1	-1	-1	-1	-1
438.517	62.8663	52.92	3	-1	1	265.661	39.1691	2.68581	2		-1	-1	1	0	-1	-1	-1	-1	-1	-1	-1
317.867	65.076	52.92	3	-1	1	146.969	37.0311	2.7483	2		-1	-1	1	0	-1	-1	-1	-1	-1	-1	-1
492.876	62.8663	52.92	3	-1	1	319.53	40.9515	2.66699	2		-1	-1	0	0	-1	-1	-1	-1	-1	-1	-1
449.124	62.4243	52.92	3	-1	1	276.137	39.8501	2.68608	2		-1	-1	0	0	-1	-1	-1	-1	-1	-1	-1
443.82	61.9824	52.92	3	-1	1	270.888	40.0888	2.69379	2		-1	-1	0	0	-1	-1	-1	-1	-1	-1	-1
503.041	62.8663	52.92	3	-1	1	329.641	41.3417	2.66548	2		-1	-1	0	0	-1	-1	-1	-1	-1	-1	-1
511.879	62.4243	52.92	3	-1	1	338.427	42.073	2.66989	2		-1	-1	0	0	-1	-1	-1	-1	-1	-1	-1
521.16	63.3082	52.92	3	-1	1	347.706	41.6777	2.65902	2		-1	-1	0	0	-1	-1	-1	-1	-1	-1	-1
529.115	61.5404	52.92	3	-1	1	355.578	43.5363	2.67949	2		-1	-1	0	0	-1	-1	-1	-1	-1	-1	-1
537.07	62.4243	52.92	3	-1	1	363.548	43.0895	2.66983	2		-1	-1	0	0	-1	-1	-1	-1	-1	-1	-1
545.909	63.3082	52.92	3	-1	1	372.409	42.6841	2.6604	2		-1	-1	0	0	-1	-1	-1	-1	-1	-1	-1
557.399	65.076	52.92	3	-1	1	383.963	41.6322	2.64089	2		-1	-1	0	0	-1	-1	-1	-1	-1	-1	-1
410.675	62.8663	52.92	3	-1	1	238.202	38.5738	2.7021	2		-1	-1	0	0	-1	-1	-1	-1	-1	-1	-1
406.255	62.8663	52.92	3	-1	1	233.851	38.506	2.70503	2		-1	-1	0	0	-1	-1	-1	-1	-1	-1	-1
392.113	60.6565	51.94	3	-1	1	219.922	40.7584	2.71805	2		-1	-1	0	0	-1	-1	-1	-1	-1	-1	-1
313.226	66.6228	51.94	3	-1	1	142.338	36.2015	2.70951	2		-1	-1	0	0	-1	-1	-1	-1	-1	-1	-1
306.929	68.28	51.94	3	-1	1	136.082	34.918	2.69333	2		-1	-1	0	0	-1	-1	-1	-1	-1	-1	-1
302.288	68.6115	51.94	3	-1	1	131.505	34.7713	2.69296	2		-1	-1	0	0	-1	-1	-1	-1	-1	-1	-1
296.985	68.28	51.94	3	-1	1	126.303	35.2425	2.70202	2		-1	-1	0	0	-1	-1	-1	-1	-1	-1	-1
291.019	67.9486	51.94	3	-1	1	120.451	35.7538	2.71134	2		-1	-1	0	0	-1	-1	-1	-1	-1	-1	-1
284.39	70.2688	51.94	3	-1	1	113.817	33.9619	2.68595	2		-1	-1	0	0	-1	-1	-1	-1	-1	-1	-1
278.423	69.9373	51.94	3	-1	1	107.96	34.5001	2.69574	2		-1	-1	0	0	-1	-1	-1	-1	-1	-1	-1
272.126	70.6002	51.94	3	-1	1	101.725	34.1928	2.69201	2		-1	-1	0	0	-1	-1	-1	-1	-1	-1	-1
326.816	65.6284	51.94	3	-1	1	155.723	36.7489	2.71047	2		-1	-1	0	0	-1	-1	-1	-1	-1	-1	-1
332.782	65.6284	51.94	3	-1	1	161.582	36.6287	2.70543	2		-1	-1	0	0	-1	-1	-1	-1	-1	-1	-1
338.086	64.634	51.94	3	-1	1	166.819	37.4195	2.71327	2		-1	-1	0	0	-1	-1	-1	-1	-1	-1	-1
344.052	65.9598	51.94	3	-1	1	172.642	36.1577	2.69153	2		-1	-1	0	0	-1	-1	-1	-1	-1	-1	-1
348.692	65.6284	51.94	3	-1	1	177.209	36.3947	2.69188	2		-1	-1	0	0	-1	-1	-1	-1	-1	-1	-1
354.658	64.9655	51.94	3	-1	1	183.084	36.9232	2.69538	2		-1	-1	0	0	-1	-1	-1	-1	-1	-1	-1
360.293	64.3026	51.94	3	-1	1	188.631	37.4708	2.69909	2		-1	-1	0	0	-1	-1	-1	-1	-1	-1	-1
365.597	64.3026	51.94	3	-1	1	193.839	37.4485	2.69481	2		-1	-1	0	0	-1	-1	-1	-1	-1	-1	-1
370.568	63.3082	51.94	3	-1	1	198.738	38.3184	2.70313	2		-1	-1	0	0	-1	-1	-1	-1	-1	-1	-1
375.872	61.9824	51.94	3	-1	1	203.963	39.4979	2.71471	2		-1	-1	0	0	-1	-1	-1	-1	-1	-1	-1
381.175	61.9824	51.94	3	-1	1	209.17	39.5109	2.7108	2		-1	-1	0	0	-1	-1	-1	-1	-1	-1	-1
386.478	61.9824	51.94	3	-1	1	214.378	39.5371	2.70697	2		-1	-1	0	0	-1	-1	-1	-1	-1	-1	-1
578.06	63.3082	51.94	3	-1	1	404.554	44.484	2.64743	2		-1	-1	0	0	-1	-1	-1	-1	-1	-1	-1
587.009	62.9767	51.94	3	-1	1	413.503	45.1252	2.65378	2		-1	-1	0	0	-1	-1	-1	-1	-1	-1	-1
670.205	66.9542	51.94	3	-1	1	497.098	44.7354	2.6473	2		-1	-1	0	0	-1	-1	-1	-1	-1	-1	-1
685.784	65.2969	51.94	3	-1	1	512.662	46.673	2.6748	2		-1	-1	0	0	-1	-1	-1	-1	-1	-1	-1
705.339	64.9655	51.94	3	-1	1	532.275	47.5737	2.69023	2		-1	-1	0	0	-1	-1	-1	-1	-1	-1	-1
725.89	67.2857	51.94	3	-1	1	552.993	46.1413	2.68027	2		-1	-1	0	0	-1	-1	-1	-1	-1	-1	-1
742.131	68.28	51.94	3	-1	1	569.331	45.7167	2.68161	2		-1	-1	0	0	-1	-1	-1	-1	-1	-1	-1
760.03	72.589	51.94	3	-1	1	587.459	42.4302	2.6475	2		-1	-1	0	0	-1	-1	-1	-1	-1	-1	-1
795.827	73.2519	51.94	3	-1	1	623.391	42.6622	2.67142	2		-1	-1	0	0	-1	-1	-1	-1	-1	-1	-1
830.63	73.9148	51.94	3	-1	1	658.314	42.7848	2.69642	2		-1	-1	0	0	-1	-1	-1	-1	-1	-1	-1
860.461	69.2744	51.94	3	-1	1	688.058	47.5414	2.76829	2		-1	-1	0	0	-1	-1	-1	-1	-1	-1	-1
905.539	68.6115	51.94	3	-1	1	733.082	49.0708	2.81183	2		-1	-1	0	0	-1	-1	-1	-1	-1	-1	-1
432.551	118.33	63.7	5	-1	1	260.721	22.5361	0.396874	2		-1	-1	0	0	-1	-1	-1	-1	-1	-1	-1
421.281	117.667	63.7	5	-1	1	249.359	21.894	0.390945	2		-1	-1	0	0	-1	-1	-1	-1	-1	-1	-1
409.68	117.667	63.7	5	-1	1	237.667	21.8284	0.374888	2		-1	-1	0	0	-1	-1	-1	-1	-1	-1	-1
397.748	116.673	63.7	5	-1	1	225.642	20.7697	0.374281	2		-1	-1	0	0	-1	-1	-1	-1	-1	-1	-1
444.483	118.993	63.7	5	-1	1	272.752	23.1304	0.404063	2		-1	-1	0	0	-1	-1	-1	-1	-1	-1	-1
456.084	120.319	63.7	5	-1	1	284.462	24.2991	0.401077	2		-1	-1	0	0	-1	-1	-1	-1	-1	-1	-1
471.663	122.307	63.7	5	-1	1	300.198	25.9951	0.394977	2		-1	-1	1	0	-1	-1	-1	-1	-1	-1	-1
481.275	121.645	63.7	5	-1	1	309.859	25.2371	0.417092	2		-1	-1	1	0	-1	-1	-1	-1	-1	-1	-1
491.55	121.645	63.7	5	-1	1	320.197	25.0668	0.431171	2		-1	-1	0	0	-1	-1	-1	-1	-1	-1	-1
509.117	122.97	63.7	5	-1	1	337.904	25.9433	0.434758	2		-1	-1	0	0	-1	-1	-1	-1	-1	-1	-1
515.746	123.633	63.7	5	-1	1	344.589	26.405	0.433457	2		-1	-1	0	0	-1	-1	-1	-1	-1	-1	-1
529.005	123.633	63.7	5	-1	1	357.91	26.0778	0.449671	2		-1	-1	0	0	-1	-1	-1	-1	-1	-1	-1
387.141	117.336	63.7	5	-1	1	214.95	21.2509	0.351274	2		-1	-1	0	0	2	-1	-1	-1	-1	-1	-1
376.866	117.336	63.7	5	-1	1	204.594	21.0696	0.339762	2		-1	-1	0	0	2	-1	-1	-1	-1	-1	-1
368.58	117.999	63.7	5	-1	1	196.233	21.5316	0.322527	2		-1	-1	0	0	2	-1	-1	-1	-1	-1	-1
357.31	117.004	63.7	5	-1	1	184.896	20.299	0.325472	2		-1	-1	0	0	2	-1	-1	-1	-1	-1	-1
344.383	117.336	63.7	5	-1	1	171.87	20.2415	0.311122	2		-1	-1	0	0	2	-1	-1	-1	-1	-1	-1
337.754	117.667	63.7	5	-1	1	165.186	20.3454	0.302677	2		-1	-1	0	0	2	-1	-1	-1	-1	-1	-1
329.468	118.33	63.7	5	-1	1	156.824	20.6955	0.290235	2		-1	-1	0	0	2	-1	-1	-1	-1	-1	-1
323.17	118.993	63.7	5	-1	1	150.462	21.1018	0.279987	2		-1	-1	0	0	2	-1	-1	-1	-1	-1	-1
315.547	119.656	63.7	5	-1	1	142.764	21.4419	0.270356	2		-1	-1	0	0	2	-1	-1	-1	-1	-1	-1
308.255	119.656	63.7	5	-1	1	135.428	21.1324	0.268762	2		-1	-1	0	0	2	-1	-1	-1	-1	-1	-1
299.637	119.656	63.7	5	-1	1	126.762	20.7447	0.26791	2		-1	-1	0	0	2	-1	-1	-1	-1	-1	-1
293.67	119.656	63.7	5	-1	1	120.765	20.4628	0.268007	2		-1	-1	0	0	2	-1	-1	-1	-1	-1	-1
285.053	118.661	63.7	5	-1	1	112.158	19.0705	0.280845	2		-1	-1	0	0	2	-1	-1	-1	-1	-1	-1
277.429	118.33	63.7	5	-1	1	104.524	18.356	0.287608	2		-1	-1	0	0	2	-1	-1	-1	-1	-1	-1
345.046	77.2294	62.72	5	-1	1	173.564	21.5154	2.88472	2		-1	-1	0	0	2	-1	-1	-1	-1	-1	-1
336.428	78.2237	62.72	5	-1	1	165.009	20.7411	2.88224	2		-1	-1	0	0	2	-1	-1	-1	-1	-1	-1
308.586	78.2237	62.72	5	-1	1	137.456	21.5536	2.9166	2		-1	-1	0	0	2	-1	-1	-1	-1	-1	-1
301.957	79.2181	62.72	5	-1	1	130.852	20.8431	2.91144	2		-1	-1	0	0	2	-1	-1	-1	-1	-1	-1
412	75.2406	62.72	5	-1	1	239.839	23.2695	2.82687	2		-1	-1	0	0	2	-1	-1	-1	-1	-1	-1
402.72	75.2406	62.72	5	-1	1	230.65	23.1623	2.83787	2		-1	-1	0	0	2	-1	-1	-1	-1	-1	-1
363.608	76.235	62.72	5	-1	1	191.945	22.2084	2.87384	2		-1	-1	0	0	2	-1	-1	-1	-1	-1	-1
355.984	77.2294	62.72	5	-1	1	184.385	21.3458	2.87003	2		-1	-1	0	0	2	-1	-1	-1	-1	-1	-1
272.126	122.639	64.68	4	-1	1	98.971	22.099	0.199425	2		-1	-1	0	0	2	-1	-1	-1	-1	-1	-1
270.469	125.953	64.68	4	-1	1	97.1221	25.2829	0.179456	2		-1	-1	0	0	2	-1	-1	-1	-1	-1	-1
259.53	122.97	64.68	4	-1	1	86.3039	21.7176	0.200928	2		-1	-1	0	0	2	-1	-1	-1	-1	-1	-1
439.511	124.296	64.68	4	-1	1	267.848	27.9195	0.298079	2		-1	-1	0	0	2	-1	-1	-1	-1	-1	-1
438.517	130.262	64.68	4	-1	1	266.927	33.7336	0.252562	2		-1	-1	0	0	2	-1	-1	-1	-1	-1	-1
446.803	130.262	64.68	4	-1	1	275.308	33.663	0.260611	2		-1	-1	0	0	2	-1	-1	-1	-1	-1	-1
449.455	124.959	64.68	4	-1	1	277.895	28.4841	0.30377	2		-1	-1	0	0	2	-1	-1	-1	-1	-1	-1
473.651	132.251	64.68	4	-1	1	302.478	35.2235	0.273402	2		-1	-1	0	0	2	-1	-1	-1	-1	-1	-1
474.977	127.279	64.68	4	-1	1	303.69	30.3824	0.31208	2		-1	-1	0	0	2	-1	-1	-1	-1	-1	-1
482.932	127.942	64.68	4	-1	1	311.726	30.8758	0.314859	2		-1	-1	0	0	2	-1	-1	-1	-1	-1	-1
481.938	132.583	64.68	4	-1	1	310.851	35.387	0.278818	2		-1	-1	0	0	2	-1	-1	-1	-1	-1	-1
493.87	128.274	64.68	4	-1	1	322.755	30.9686	0.323404	2		-1	-1	0	0	2	-1	-1	-1	-1	-1	-1
503.814	127.611	64.68	4	-1	1	332.744	30.1054	0.339922	2		-1	-1	0	0	2	-1	-1	-1	-1	-1	-1
512.763	130.594	64.68	4	-1	1	341.848	32.7398	0.32182	2		-1	-1	0	0	2	-1	-1	-1	-1	-1	-1
518.398	130.594	64.68	4	-1	1	347.516	32.588	0.326964	2		-1	-1	0	0	2	-1	-1	-1	-1	-1	-1
465.696	131.257	64.68	4	-1	1	294.421	34.39	0.272427	2		-1	-1	0	0	-1	-1	-1	-1	-1	-1	-1
457.41	131.588	64.68	4	-1	1	286.056	34.8337	0.262433	2		-1	-1	0	0	-1	-1	-1	-1	-1	-1	-1
492.876	132.583	64.68	4	-1	1	321.882	35.1511	0.288659	2		-1	-1	0	0	-1	-1	-1	-1	-1	-1	-1
502.488	132.914	64.68	4	-1	1	331.579	35.2424	0.294807	2		-1	-1	0	0	-1	-1	-1	-1	-1	-1	-1
411.669	128.937	64.68	4	-1	1	239.737	32.4975	0.234851	2		-1	-1	0	0	-1	-1	-1	-1	-1	-1	-1
404.377	127.611	64.68	4	-1	1	232.352	31.1659	0.235932	2		-1	-1	0	0	-1	-1	-1	-1	-1	-1	-1
395.096	127.942	64.68	4	-1	1	222.954	31.4226	0.225406	2		-1	-1	0	0	-1	-1	-1	-1	-1	-1	-1
384.158	127.611	64.68	4	-1	1	211.879	30.9718	0.217743	2		-1	-1	0	0	-1	-1	-1	-1	-1	-1	-1
421.281	128.937	64.68	4	-1	1	249.47	32.5058	0.244009	2		-1	-1	0	0	-1	-1	-1	-1	-1	-1	-1
428.573	128.937	64.68	4	-1	1	256.85	32.4897	0.251134	2		-1	-1	0	0	-1	-1	-1	-1	-1	-1	-1
429.568	123.965	64.68	4	-1	1	257.804	27.6416	0.289381	2		-1	-1	0	0	-1	-1	-1	-1	-1	-1	-1
419.955	124.296	64.68	4	-1	1	248.097	27.9734	0.275585	2		-1	-1	0	0	-1	-1	-1	-1	-1	-1	-1
379.849	123.302	64.68	4	-1	1	207.563	26.6737	0.241642	2		-1	-1	0	0	-1	-1	-1	-1	-1	-1	-1
374.546	123.302	64.68	4	-1	1	202.203	26.5832	0.23677	2		-1	-1	0	0	-1	-1	-1	-1	-1	-1	-1
365.928	122.639	64.68	4	-1	1	193.505	25.7615	0.234062	2		-1	-1	0	0	-1	-1	-1	-1	-1	-1	-1
361.951	122.307	64.68	4	-1	1	189.494	25.3469	0.233184	2		-1	-1	0	0	-1	-1	-1	-1	-1	-1	-1
352.67	122.639	64.68	4	-1	1	180.114	25.4403	0.223528	2		-1	-1	0	0	-1	-1	-1	-1	-1	-1	-1
348.692	121.645	64.68	4	-1	1	176.123	24.3527	0.227886	2		-1	-1	0	0	-1	-1	-1	-1	-1	-1	-1
341.4	122.307	64.68	4	-1	1	168.747	24.7869	0.218119	2		-1	-1	0	0	-1	-1	-1	-1	-1	-1	-1
335.103	122.639	64.68	4	-1	1	162.382	24.9092	0.212051	2		-1	-1	0	0	-1	-1	-1	-1	-1	-1	-1
325.822	124.296	64.68	4	-1	1	152.963	26.2166	0.196913	2		-1	-1	0	0	-1	-1	-1	-1	-1	-1	-1
320.518	126.285	64.68	4	-1	1	147.538	27.9816	0.183926	2		-1	-1	0	0	-1	-1	-1	-1	-1	-1	-1
311.569	127.279	64.68	4	-1	1	138.465	28.604	0.176094	2		-1	-1	0	0	-1	-1	-1	-1	-1	-1	-1
309.249	123.633	64.68	4	-1	1	136.275	24.899	0.194728	2		-1	-1	1	0	-1	-1	-1	-1	-1	-1	-1
288.367	124.628	64.68	4	-1	1	115.199	24.9118	0.185583	2		-1	-1	1	0	-1	-1	-1	-1	-1	-1	-1
292.345	127.942	64.68	4	-1	1	119.043	28.3888	0.169275	2		-1	-1	1	0	-1	-1	-1	-1	-1	-1	-1
295.991	124.628	64.68	4	-1	1	122.874	25.2825	0.186221	2		-1	-1	0	0	-1	-1	-1	-1	-1	-1	-1
302.951	129.268	64.68	4	-1	1	129.681	30.1997	0.165348	2		-1	-1	0	0	-1	-1	-1	-1	-1	-1	-1
418.961	148.493	65.66	2	-1	1	247.274	51.7102	0.148533	2		-1	-1	1	0	-1	-1	-1	-1	-1	-1	-1
363.276	146.172	65.66	2	-1	1	190.412	48.9274	0.121668	2		-1	-1	1	0	-1	-1	-1	-1	-1	-1	-1
333.114	145.841	65.66	2	-1	1	159.647	47.7888	0.109434	2		-1	-1	1	0	-1	-1	-1	-1	-1	-1	-1
290.687	145.178	65.66	2	-1	1	116.534	45.3735	0.100037	2		-1	-1	1	0	-1	-1	-1	-1	-1	-1	-1
266.491	142.526	65.66	2	-1	1	92.1787	41.4467	0.102383	2		-1	-1	1	0	-1	-1	-1	-1	-1	-1	-1
391.45	46.0725	65.66	2	-1	1	219.737	51.1912	3.09462	2		-1	-1	1	0	-1	-1	-1	-1	-1	-1	-1
386.147	46.4039	65.66	2	-1	1	214.553	50.8821	3.09703	2		-1	-1	1	0	-1	-1	-1	-1	-1	-1	-1
276.766	57.6734	65.66	2	-1	1	107.038	42.864	3.12757	2		-1	-1	1	0	-1	-1	-1	-1	-1	-1	-1
266.491	46.4039	65.66	1	-1	1	97.5373	54.65	3.14092	2		-1	-1	0	0	2	-1	-1	-1	-1	-1	-1
186.61	67.6171	65.66	1	-1	1	17.2997	38.7727	3.10991	2		-1	-1	0	0	2	-1	-1	-1	-1	-1	-1
169.374	87.5045	65.66	1	-1	1	-1.32024	20.3134	3.02889	2		-1	-1	0	0	2	-1	-1	-1	-1	-1	-1
200.863	141.2	65.66	1	-1	1	26.2224	35.8664	0.122893	2		-1	-1	0	0	2	-1	-1	-1	-1	-1	-1
200.863	145.841	65.66	1	-1	1	25.8887	40.4824	0.114001	2		-1	-1	0	0	2	-1	-1	-1	-1	-1	-1
232.351	146.504	65.66	1	-1	1	57.4767	43.3126	0.101846	2		-1	-1	0	0	2	-1	-1	-1	-1	-1	-1
245.278	147.167	65.66	1	-1	1	70.4715	44.8034	0.0984108	2		-1	-1	0	0	2	-1	-1	-1	-1	-1	-1
162.414	75.9035	67.62	1	-1	1	-7.45268	32.1628	-3.13738	2		-1	-1	0	0	2	-1	-1	-1	-1	-1	-1
216.11	60.3251	67.62	1	-1	1	47.0761	43.8421	-3.11163	2		-1	-1	0	0	2	-1	-1	-1	-1	-1	-1
284.721	158.436	68.6	1	-1	1	109.817	58.248	0.0361841	2		-1	-1	0	0	2	-1	-1	-1	-1	-1	-1
161.419	142.526	69.58	1	-1	1	-13.2605	34.2467	0.0263139	2		-1	-1	0	0	2	-1	-1	-1	-1	-1	-1
183.958	128.274	69.58	2	-1	1	10.2434	21.6656	0.0022231	2		-1	-1	0	0	2	-1	-1	-1	-1	-1	-1
180.644	125.622	69.58	2	-1	1	7.12841	18.7834	-0.00210763	2		-1	-1	0	0	2	-1	-1	-1	-1	-1	-1
182.964	127.611	74.48	1	-1	1	9.23754	21.7012	-0.227018	2		-1	-1	0	0	2	-1	-1	-1	-1	-1	-1
177.661	127.611	74.48	1	-1	1	3.94839	21.3159	-0.228782	2		-1	-1	0	0	2	-1	-1	-1	-1	-1	-1
243.289	148.493	74.48	1	-1	1	68.344	46.3762	-0.0944265	2		-1	-1	0	0	2	-1	-1	-1	-1	-1	-1
257.21	149.487	74.48	1	-1	1	82.3814	48.2133	-0.0897667	2		-1	-1	0	0	2	-1	-1	-1	-1	-1	-1
297.648	160.425	74.48	1	-1	1	122.968	61.1797	-0.0581484	2		-1	-1	0	0	2	-1	-1	-1	-1	-1	-1
285.053	157.773	74.48	1	-1	1	110.23	57.9473	-0.0656967	2		-1	-1	0	0	2	-1	-1	-1	-1	-1	-1
273.12	156.779	74.48	1	-1	1	98.1209	56.3399	-0.0699464	2		-1	-1	0	0	2	-1	-1	-1	-1	-1	-1
233.014	155.122	74.48	1	-1	1	57.5094	52.2676	-0.0776246	2		-1	-1	0	0	2	-1	-1	-1	-1	-1	-1
202.188	147.167	74.48	1	-1	1	27.0043	42.2327	-0.0993136	2		-1	-1	0	0	2	-1	-1	-1	-1	-1	-1
294.002	43.0893	74.48	1	-1	1	124.737	56.8548	-2.98836	2		-1	-1	0	0	2	-1	-1	-1	-1	-1	-1
273.452	46.7354	74.48	1	-1	1	104.392	54.2632	-2.98001	2		-1	-1	0	0	2	-1	-1	-1	-1	-1	-1
243.952	56.6791	74.48	1	-1	1	74.7671	46.1035	-2.95794	2		-1	-1	0	0	2	-1	-1	-1	-1	-1	-1
186.279	131.588	59.78	1	-1	1	12.4428	26.6391	0.384272	2		-1	-1	0	0	2	-1	-1	-1	-1	-1	-1
174.015	100.1	59.78	1	-1	1	2.47617	11.5021	2.28511	2		-1	-1	0	0	2	-1	-1	-1	-1	-1	-1
174.346	90.4876	59.78	1	-1	1	3.49802	18.9909	2.69133	2		-1	-1	0	0	2	-1	-1	-1	-1	-1	-1
169.043	86.8416	59.78	1	-1	1	-1.52891	22.6364	2.77318	2		-1	-1	0	0	2	-1	-1	-1	-1	-1	-1
155.122	75.5721	59.78	1	-1	1	-14.6025	34.2538	2.91253	2		-1	-1	0	0	2	-1	-1	-1	-1	-1	-1
141.2	81.2068	59.78	1	-1	1	-28.8917	29.887	2.86496	2		-1	-1	0	0	2	-1	-1	-1	-1	-1	-1
136.892	93.4707	58.1778	1	-1	1	-34.0509	19.8222	2.59183	2		-1	-1	0	0	2	-1	-1	-1	-1	-1	-1
123.965	121.645	59.78	1	-1	1	-48.9896	14.4195	0.777393	2		-1	-1	0	0	2	-1	-1	-1	-1	-1	-1
150.15	138.549	59.78	1	-1	1	-24.0901	30.9055	0.351501	2		-1	-1	0	0	2	-1	-1	-1	-1	-1	-1
253.564	47.7297	59.78	1	-1	1	84.7737	54.6415	3.03293	2		-1	-1	0	0	2	-1	-1	-1	-1	-1	-1
268.48	46.0725	59.78	1	-1	1	99.4825	55.4455	3.03459	2		-1	-1	0	0	2	-1	-1	-1	-1	-1	-1
223.07	62.3138	59.78	1	-1	1	53.8757	42.2249	2.98475	2		-1	-1	1	0	2	-1	-1	-1	-1	-1	-1
292.345	154.79	56.84	1	-1	1	117.665	56.1475	0.248162	2		-1	-1	0	0	2	-1	-1	-1	-1	-1	-1
281.738	152.47	56.84	1	-1	1	107.023	53.344	0.25764	2		-1	-1	0	0	2	-1	-1	-1	-1	-1	-1
269.474	151.807	56.84	1	-1	1	94.6433	52.0391	0.262105	2		-1	-1	0	0	2	-1	-1	-1	-1	-1	-1
237.654	144.846	56.84	1	-1	1	62.9785	43.4259	0.307459	2		-1	-1	0	0	2	-1	-1	-1	-1	-1	-1
249.587	145.841	56.84	1	-1	1	74.9254	45.1051	0.296335	2		-1	-1	0	0	2	-1	-1	-1	-1	-1	-1
260.525	143.852	56.84	1	-1	1	86.068	43.8187	0.303608	2		-1	-1	0	0	2	-1	-1	-1	-1	-1	-1
226.053	144.184	56.84	1	-1	1	51.3626	42.0667	0.318159	2		-1	-1	0	0	2	-1	-1	-1	-1	-1	-1
202.851	137.554	56.84	1	-1	1	28.5794	34.286	0.390185	2		-1	-1	0	0	2	-1	-1	-1	-1	-1	-1
188.93	77.5608	51.94	1	-1	1	19.0718	33.0615	2.65692	2		-1	-1	0	0	2	-1	-1	-1	-1	-1	-1
224.396	141.532	51.94	1	-1	1	49.9213	41.1039	0.451915	2		-1	-1	0	0	2	-1	-1	-1	-1	-1	-1
236.991	142.195	51.94	1	-1	1	62.512	42.452	0.435966	2		-1	-1	0	0	2	-1	-1	-1	-1	-1	-1
297.979	153.796	49.98	1	-1	1	123.366	57.2557	0.369409	2		-1	-1	0	0	2	-1	-1	-1	-1	-1	-1
306.929	152.47	49.98	1	-1	1	132.506	56.4125	0.376323	2		-1	-1	0	0	2	-1	-1	-1	-1	-1	-1
347.698	152.801	46.5768	1	-1	1	173.907	59.4896	0.432057	2		-1	-1	0	0	2	-1	-1	-1	-1	-1	-1
250.25	143.852	49.98	1	-1	1	75.731	45.4925	0.453842	2		-1	-1	0	0	2	-1	-1	-1	-1	-1	-1
174.678	132.251	48.02	1	-1	1	0.973532	32.4637	0.739229	2		-1	-1	0	0	2	-1	-1	-1	-1	-1	-1
212.464	73.9148	41.16	1	-1	1	42.8031	40.8377	2.45714	2		-1	-1	0	0	2	-1	-1	-1	-1	-1	-1
247.929	63.6397	41.16	1	-1	1	78.3222	46.9445	2.57363	2		-1	-1	0	0	2	-1	-1	-1	-1	-1	-1
318.198	151.807	37.24	1	-1	1	143.781	61.6548	0.57659	2		-1	-1	0	0	2	-1	-1	-1	-1	-1	-1
331.125	151.144	37.24	1	-1	1	156.911	61.5936	0.581221	2		-1	-1	0	0	2	-1	-1	-1	-1	-1	-1
282.401	145.178	37.24	1	-1	1	107.954	54.4951	0.647601	2		-1	-1	0	0	2	-1	-1	-1	-1	-1	-1
271.131	144.515	37.24	1	-1	1	96.6637	53.4271	0.660271	2		-1	-1	0	0	2	-1	-1	-1	-1	-1	-1
257.21	146.172	37.24	1	-1	1	82.5947	54.1151	0.650914	2		-1	-1	0	0	2	-1	-1	-1	-1	-1	-1
228.705	140.538	37.24	1	-1	1	54.4175	48.2641	0.740649	2		-1	-1	0	0	2	-1	-1	-1	-1	-1	-1
198.211	84.5214	37.24	1	-1	1	28.0128	37.6021	2.20356	2		-1	-1	0	0	2	-1	-1	-1	-1	-1	-1
236.66	70.6002	38.22	1	-1	1	66.8407	43.9464	2.43594	2		-1	-1	1	0	2	-1	-1	-1	-1	-1	-1
253.233	67.2857	38.22	1	-1	1	83.3112	45.6245	2.4709	2		-1	-1	1	0	2	-1	-1	-1	-1	-1	-1
168.38	119.987	34.3	1	-1	1	-4.25215	36.6718	1.27318	2		-1	-1	0	0	2	-1	-1	-1	-1	-1	-1
219.424	76.8979	34.3	1	-1	1	49.5133	43.3992	2.28618	2		-1	-1	0	0	2	-1	-1	-1	-1	-1	-1
235.003	69.9373	34.3	1	-1	1	65.2726	47.2387	2.38593	2		-1	-1	0	0	2	-1	-1	-1	-1	-1	-1
211.138	87.836	34.3	1	-1	1	40.6061	37.8994	2.06966	2		-1	-1	0	0	2	-1	-1	-1	-1	-1	-1
259.862	140.869	30.38	1	-1	1	85.5653	54.4783	0.808718	2		-1	-1	0	0	2	-1	-1	-1	-1	-1	-1
270.8	140.869	30.38	1	-1	1	96.5116	54.9445	0.801099	2		-1	-1	0	0	2	-1	-1	-1	-1	-1	-1
281.075	141.2	30.38	1	-1	1	106.789	55.6219	0.790786	2		-1	-1	0	0	2	-1	-1	-1	-1	-1	-1
290.356	141.532	30.38	1	-1	1	116.081	56.2557	0.781964	2		-1	-1	0	0	2	-1	-1	-1	-1	-1	-1
336.76	46.4039	30.38	1	-1	1	165.615	64.4012	2.54334	2		-1	-1	0	0	2	-1	-1	-1	-1	-1	-1
362.613	120.65	14.7	1	-1	1	188.944	59.4899	1.21325	2		-1	-1	0	0	2	-1	-1	-1	-1	-1	-1
350.681	112.695	14.7	1	-1	1	177.209	56.5166	1.34544	2		-1	-1	0	0	2	-1	-1	-1	-1	-1	-1
311.901	123.302	14.7	1	-1	1	138.261	59.028	1.1891	2		-1	-1	0	0	2	-1	-1	-1	-1	-1	-1
297.979	120.982	14.7	1	-1	1	124.519	57.726	1.23388	2		-1	-1	0	0	2	-1	-1	-1	-1	-1	-1
284.721	118.993	14.7	1	-1	1	111.459	56.6927	1.27597	2		-1	-1	0	0	2	-1	-1	-1	-1	-1	-1
316.21	105.072	14.7	1	-1	1	143.254	54.198	1.49744	2		-1	-1	0	0	2	-1	-1	-1	-1	-1	-1
311.238	74.5777	14.7	1	-1	1	139.549	59.0133	2.03887	2		-1	-1	0	0	2	-1	-1	-1	-1	-1	-1
387.804	62.6453	14.7	1	-1	1	214.638	65.2714	2.17004	2		-1	-1	0	0	2	-1	-1	-1	-1	-1	-1
396.422	138.217	14.7	1	-1	1	222.778	69.2608	0.977472	2		-1	-1	0	0	2	-1	-1	-1	-1	-1	-1
271.463	92.4764	18.62	1	-1	1	99.7656	50.1743	1.78047	2		-1	-1	0	0	2	-1	-1	-1	-1	-1	-1
275.109	110.706	18.62	1	-1	1	102.39	50.5073	1.41374	2		-1	-1	0	0	2	-1	-1	-1	-1	-1	-1
291.35	124.628	18.62	1	-1	1	117.796	55.455	1.15138	2		-1	-1	0	0	2	-1	-1	-1	-1	-1	-1
337.754	122.307	14.7	1	-1	1	164.063	59.396	1.19339	2		-1	-1	0	0	2	-1	-1	-1	-1	-1	-1
336.097	113.358	14.7	1	-1	1	162.683	56.2897	1.33946	2		-1	-1	0	0	2	-1	-1	-1	-1	-1	-1
324.164	121.976	14.7	1	-1	1	150.524	58.8527	1.2037	2		-1	-1	0	0	2	-1	-1	-1	-1	-1	-1
324.827	113.69	14.7	1	-1	1	151.476	56.0796	1.33911	2		-1	-1	0	0	2	-1	-1	-1	-1	-1	-1
314.552	114.684	14.7	1	-1	1	141.24	56.0919	1.32782	2		-1	-1	0	0	2	-1	-1	-1	-1	-1	-1
197.88	104.906	33.65	1	-1	1	26.2615	34.8324	1.63175	2		-1	-1	0	0	2	-1	-1	-1	-1	-1	-1
194.234	93.1393	33.32	1	-1	1	23.4756	37.3985	1.95739	2		-1	-1	0	0	2	-1	-1	-1	-1	-1	-1
196.554	84.5214	33.32	1	-1	1	26.4094	40.9934	2.15232	2		-1	-1	0	0	2	-1	-1	-1	-1	-1	-1
212.132	132.583	40.18	1	-1	1	38.3992	39.6785	0.833288	2		-1	-1	0	0	2	-1	-1	-1	-1	-1	-1
202.188	127.279	40.18	1	-1	1	28.8675	35.7951	0.954481	2		-1	-1	0	0	2	-1	-1	-1	-1	-1	-1
353.664	157.773	82.32	1	-1	1	180.725	61.5826	-0.170561	2		-1	-1	0	0	2	-1	-1	-1	-1	-1	-1
346.704	162.414	82.32	1	-1	1	173.436	65.9886	-0.158597	2		-1	-1	0	0	2	-1	-1	-1	-1	-1	-1
339.411	156.116	82.32	1	-1	1	166.107	59.6721	-0.18299	2		-1	-1	0	0	2	-1	-1	-1	-1	-1	-1
324.496	155.785	82.32	1	-1	1	150.794	58.9423	-0.19081	2		-1	-1	0	0	2	-1	-1	-1	-1	-1	-1
311.569	154.459	82.32	1	-1	1	137.586	57.2214	-0.201646	2		-1	-1	0	0	2	-1	-1	-1	-1	-1	-1
299.637	152.47	82.32	1	-1	1	125.459	54.8337	-0.215369	2		-1	-1	0	0	2	-1	-1	-1	-1	-1	-1
297.316	159.431	82.32	1	-1	1	122.756	61.4834	-0.187272	2		-1	-1	0	0	2	-1	-1	-1	-1	-1	-1
270.137	156.116	82.32	1	-1	1	95.1447	56.9576	-0.209278	2		-1	-1	0	0	2	-1	-1	-1	-1	-1	-1
232.682	153.464	82.32	1	-1	1	57.2323	52.1674	-0.231748	2		-1	-1	0	0	2	-1	-1	-1	-1	-1	-1
312.563	38.7804	83.3	1	-1	1	143.211	61.8287	-2.85613	2		-1	-1	0	0	2	-1	-1	-1	-1	-1	-1
298.311	43.7523	83.3	1	-1	1	129.031	57.6382	-2.83465	2		-1	-1	0	0	2	-1	-1	-1	-1	-1	-1
285.053	46.0725	83.3	1	-1	1	115.892	56.0338	-2.82441	2		-1	-1	0	0	2	-1	-1	-1	-1	-1	-1
275.44	48.0612	83.3	1	-1	1	106.328	54.6097	-2.81574	2		-1	-1	0	0	2	-1	-1	-1	-1	-1	-1
261.519	48.3927	83.3	1	-1	1	92.5875	55.0353	-2.81684	2		-1	-1	0	0	2	-1	-1	-1	-1	-1	-1
171.032	107.723	94.148	1	-1	1	-1.48108	25.3274	-1.52005	2		-1	-1	0	0	-1	-1	-1	-1	-1	-1	-1
210.143	144.515	83.3	1	-1	1	35.0527	42.4437	-0.3168	2		-1	-1	0	0	2	-1	-1	-1	-1	-1	-1
246.604	146.172	83.3	1	-1	1	71.8182	46.394	-0.291042	2		-1	-1	0	0	2	-1	-1	-1	-1	-1	-1
227.379	144.184	83.3	1	-1	1	52.486	43.3141	-0.313394	2		-1	-1	0	0	2	-1	-1	-1	-1	-1	-1
210.143	143.852	88.2	1	-1	1	35.0414	43.8152	-0.427408	2		-1	-1	0	0	2	-1	-1	-1	-1	-1	-1
281.738	148.161	88.2	1	-1	1	107.443	51.8683	-0.354025	2		-1	-1	0	0	2	-1	-1	-1	-1	-1	-1
293.339	148.161	88.2	1	-1	1	119.288	52.3681	-0.348103	2		-1	-1	0	0	2	-1	-1	-1	-1	-1	-1
169.043	96.7853	68.6	2	-1	1	-2.35537	10.8355	-3.1192	2		-1	-1	0	0	-1	-1	-1	-1	-1	-1	-1
167.717	102.42	72.2719	1	-1	1	-4.12924	6.31184	-2.52493	2		2	-1	0	0	-1	-1	-1	-1	-1	-1	-1
169.209	108.055	69.2888	1	-1	1	-3.00925	0.612144	-0.774672	2		2	-1	0	0	-1	-1	-1	-1	-1	-1	-1
169.871	116.838	68.6	2	-1	1	-2.97111	9.23106	0.070462	2		-1	-1	0	0	-1	-1	-1	-1	-1	-1	-1
164.9	119.822	67.62	1	-1	1	-8.13185	11.9154	0.152708	2		2	-1	0	0	-1	-1	-1	-1	-1	-1	-1
162.579	106.398	67.62	1	-1	1	-9.48044	2.15121	2.53183	2		-1	-1	0	0	-1	-1	-1	-1	-1	-1	-1
157.442	100.266	67.62	1	-1	1	-14.1633	8.30869	3.02026	2		1	-1	0	0	-1	-1	-1	-1	-1	-1	-1
154.293	105.237	67.62	1	-1	1	-17.6613	3.73874	2.79822	2		1	-1	0	0	-1	-1	-1	-1	-1	-1	-1
153.63	111.038	67.62	1	-1	1	-18.7396	2.682	0.603597	2		1	-1	0	0	-1	-1	-1	-1	-1	-1	-1
152.636	119.822	67.62	1	-1	1	-20.363	11.058	0.17527	2		1	-1	0	0	-1	-1	-1	-1	-1	-1	-1
141.863	104.243	68.6	1	-1	1	-29.9986	5.38102	3.07668	2		1	-1	0	0	-1	-1	-1	-1	-1	-1	-1
140.206	111.867	68.6	1	-1	1	-32.1997	2.22109	0.323665	2		1	-1	0	0	-1	-1	-1	-1	-1	-1	-1
133.08	127.279	68.6	1	-1	1	-40.4155	17.0106	0.0862987	2		1	-1	0	0	-1	-1	-1	-1	-1	-1	-1
116.01	125.788	68.6	1	-1	1	-57.3326	14.3103	0.109255	2		1	-1	0	0	-1	-1	-1	-1	-1	-1	-1
120.816	107.889	68.6	1	-1	1	-51.2521	3.33707	2.92665	2		1	-1	0	0	-1	-1	-1	-1	-1	-1	-1
91.6477	110.872	68.6	1	-1	1	-80.557	2.64776	2.70433	2		1	-1	0	0	-1	-1	-1	-1	-1	-1	-1
84.5214	103.249	68.6	1	-1	1	-87.116	10.5463	3.06127	2		1	-1	0	0	-1	-1	-1	-1	-1	-1	-1
78.2237	129.268	67.62	1	-1	1	-95.2557	15.2221	0.202051	2		1	-1	0	0	-1	-1	-1	-1	-1	-1	-1
82.6984	141.532	67.62	1	-1	1	-91.675	27.6869	0.12907	2		1	-1	0	0	-1	-1	-1	-1	-1	-1	-1
112.529	143.355	67.62	1	-1	1	-62.0546	31.6129	0.106611	2		1	-1	0	0	-1	-1	-1	-1	-1	-1	-1
125.953	147.001	67.62	1	-1	1	-48.9287	36.1985	0.09409	2		-1	-1	0	0	-1	-1	-1	-1	-1	-1	-1
141.366	149.818	63.8126	1	-1	1	-33.7117	40.4369	0.178898	2		-1	-1	0	0	-1	-1	-1	-1	-1	-1	-1
146.504	145.675	67.62	1	-1	1	-28.3379	36.342	0.0867111	2		-1	-1	0	0	-1	-1	-1	-1	-1	-1	-1
156.779	148.161	67.62	1	-1	1	-18.269	39.5531	0.0800261	2		-1	-1	0	0	-1	-1	-1	-1	-1	-1	-1
168.38	152.801	67.62	1	-1	1	-7.03267	45.0085	0.0725099	2		-1	-1	0	0	-1	-1	-1	-1	-1	-1	-1
178.655	152.967	67.62	1	-1	1	3.20314	45.9091	0.0691286	2		-1	-1	0	0	-1	-1	-1	-1	-1	-1	-1
190.422	146.67	67.62	1	-1	1	15.3913	40.4719	0.0686745	2		-1	-1	0	0	-1	-1	-1	-1	-1	-1	-1
181.141	146.504	67.62	1	-1	1	6.14725	39.6424	0.0721422	2		-1	-1	0	0	-1	-1	-1	-1	-1	-1	-1
172.523	146.172	67.62	1	-1	1	-2.42378	38.6956	0.075634	2		-1	-1	0	0	-1	-1	-1	-1	-1	-1	-1
213.292	145.841	67.62	1	-1	1	38.3136	41.2801	0.0612542	2		-1	-1	0	0	-1	-1	-1	-1	-1	-1	-1
222.573	146.007	67.62	1	-1	1	47.6442	42.0898	0.0586557	2		-1	-1	0	0	-1	-1	-1	-1	-1	-1	-1
192.079	139.875	67.62	1	-1	1	17.5329	33.8154	0.072707	2		-1	-1	0	0	-1	-1	-1	-1	-1	-1	-1
182.798	138.88	67.62	1	-1	1	8.34837	32.1605	0.0777965	2		-1	-1	0	0	-1	-1	-1	-1	-1	-1	-1
173.186	134.406	67.62	1	-1	1	-0.916403	27.0145	0.0885607	2		-1	-1	0	0	-1	-1	-1	-1	-1	-1	-1
162.414	128.937	67.62	1	-1	1	-11.2667	20.8007	0.10816	2		-1	-1	0	0	-1	-1	-1	-1	-1	-1	-1
166.888	125.125	67.62	1	-1	1	-6.52982	17.3247	0.117559	2		-1	-1	0	0	-1	-1	-1	-1	-1	-1	-1
185.284	134.074	67.62	1	-1	1	11.1733	27.5473	0.0821391	2		-1	-1	0	0	3	-1	-1	-1	-1	-1	-1
132.417	103.746	80.36	1	-1	1	-39.5326	12.8385	-2.05991	2		1	-1	0	0	2	-1	-1	-1	-1	-1	-1
171.694	118.33	87.22	1	-1	1	-1.49528	21.3571	-0.996848	2		-1	-1	0	0	2	-1	-1	-1	-1	-1	-1
182.135	117.833	87.22	1	-1	1	8.95349	21.6008	-0.989777	2		-1	-1	0	0	2	-1	-1	-1	-1	-1	-1
181.804	112.032	87.22	1	-1	1	9.04007	19.2717	-1.25119	2		-1	-1	0	0	2	-1	-1	-1	-1	-1	-1
170.866	105.735	85.1987	1	-1	1	-1.39037	16.4735	-1.63634	2		-1	-1	0	0	2	-1	-1	-1	-1	-1	-1
168.877	140.206	90.16	1	-1	1	-5.91552	38.8177	-0.538218	2		-1	-1	0	0	2	-1	-1	-1	-1	-1	-1
199.703	69.2744	87.22	1	-1	1	29.966	40.6707	-2.61623	2		-1	-1	0	0	2	-1	-1	-1	-1	-1	-1
294.002	111.038	107.8	2	-1	1	121.938	41.148	-1.24783	2		-1	-1	0	0	2	-1	-1	-1	-1	-1	-1
287.87	111.701	107.8	2	-1	1	115.693	41.3043	-1.23976	2		-1	-1	0	0	2	-1	-1	-1	-1	-1	-1
284.058	111.369	107.8	2	-1	1	111.848	41.1876	-1.25213	2		-1	-1	0	0	2	-1	-1	-1	-1	-1	-1
280.412	111.535	107.8	2	-1	1	108.146	41.2057	-1.25284	2		-1	-1	0	0	2	-1	-1	-1	-1	-1	-1
358.802	147.995	107.8	1	-1	1	186.856	63.4648	-0.606795	2		-1	-1	0	0	2	-1	-1	-1	-1	-1	-1
368.414	146.67	107.8	1	-1	1	196.772	62.401	-0.614759	2		-1	-1	0	0	2	-1	-1	-1	-1	-1	-1
305.106	139.046	107.8	1	-1	1	131.967	56.0596	-0.73728	2		-1	-1	0	0	2	-1	-1	-1	-1	-1	-1
211.801	82.3669	107.8	1	-1	1	40.87	45.2891	-2.03776	2		-1	-1	0	0	2	-1	-1	-1	-1	-1	-1
200.863	84.3557	107.8	1	-1	1	29.7786	44.5969	-2.01577	2		-1	-1	0	0	2	-1	-1	-1	-1	-1	-1
250.415	71.5946	107.8	1	-1	1	80.2279	50.012	-2.17892	2		-1	-1	0	0	2	-1	-1	-1	-1	-1	-1
194.731	111.038	106.82	1	-1	1	21.7565	38.6484	-1.39334	2		-1	-1	0	0	2	-1	-1	-1	-1	-1	-1
194.896	123.965	106.82	1	-1	1	20.9921	42.3615	-1.08715	2		-1	-1	0	0	2	-1	-1	-1	-1	-1	-1
266.16	122.528	114.66	1	-1	1	93.1033	51.2594	-1.09774	2		-1	-1	0	0	2	-1	-1	-1	-1	-1	-1
330.683	58.8888	114.66	1	-1	1	160.913	60.3847	-2.23522	2		-1	-1	0	0	2	-1	-1	-1	-1	-1	-1
379.297	51.8177	114.66	1	-1	1	209.135	63.6676	-2.31961	2		-1	-1	0	0	2	-1	-1	-1	-1	-1	-1
246.714	130.483	114.66	1	-1	1	72.8337	54.4372	-0.984677	2		-1	-1	0	0	2	-1	-1	-1	-1	-1	-1
219.756	103.525	114.66	1	-1	1	47.32	46.4298	-1.53889	2		-1	-1	0	0	2	-1	-1	-1	-1	-1	-1
205.614	95.57	114.66	1	-1	1	33.6378	47.2309	-1.72867	2		-1	-1	0	0	2	-1	-1	-1	-1	-1	-1
193.239	105.293	114.66	1	-1	1	20.5831	46.1226	-1.54183	2		-1	-1	0	0	2	-1	-1	-1	-1	-1	-1
306.376	140.648	113.68	1	-1	1	133.276	61.435	-0.786162	2		-1	-1	0	0	2	-1	-1	-1	-1	-1	-1
339.522	51.8177	108.78	1	-1	1	169.755	60.8985	-2.3855	2		-1	-1	0	0	2	-1	-1	-1	-1	-1	-1
381.065	49.166	108.78	1	-1	1	210.739	61.6808	-2.41822	2		-1	-1	0	0	2	-1	-1	-1	-1	-1	-1
206.166	96.4538	106.902	1	-1	1	34.2247	39.4565	-1.74489	2		-1	-1	0	0	2	-1	-1	-1	-1	-1	-1
206.166	104.409	109.996	1	-1	1	33.6129	41.6215	-1.54207	2		-1	-1	0	0	2	-1	-1	-1	-1	-1	-1
371.342	43.4208	96.04	1	-1	1	200.921	59.9098	-2.64356	2		-1	-1	0	0	2	-1	-1	-1	-1	-1	-1
322.286	47.8402	96.04	1	-1	1	152.635	57.5494	-2.60173	2		-1	-1	0	0	2	-1	-1	-1	-1	-1	-1
358.084	152.139	96.04	1	-1	1	185.736	60.8087	-0.410867	2		-1	-1	0	0	2	-1	-1	-1	-1	-1	-1
327.59	147.719	96.04	1	-1	1	154.503	56.4436	-0.462349	2		-1	-1	0	0	2	-1	-1	-1	-1	-1	-1
314.773	145.509	96.04	1	-1	1	141.438	54.2199	-0.489804	2		-1	-1	0	0	2	-1	-1	-1	-1	-1	-1
396.974	152.58	96.04	1	-1	1	225.72	61.1641	-0.388521	2		-1	-1	0	0	2	-1	-1	-1	-1	-1	-1
407.581	152.139	96.04	1	-1	1	236.596	60.6351	-0.386717	2		-1	-1	0	0	2	-1	-1	-1	-1	-1	-1
248.482	62.4243	86.24	1	-1	1	78.8797	43.6104	-2.66709	2		-1	-1	0	0	2	-1	-1	-1	-1	-1	-1
457.962	161.861	54.88	1	-1	1	286.954	66.5715	0.307629	2		-1	-1	0	0	2	-1	-1	-1	-1	-1	-1
463.266	35.0239	54.88	1	-1	1	289.612	65.0617	2.91246	2		-1	-1	0	0	2	-1	-1	-1	-1	-1	-1
236.108	60.6565	56.84	1	-1	1	66.8445	43.6582	2.92391	2		-1	-1	0	0	2	-1	-1	-1	-1	-1	-1
392.555	146.835	80.36	2	-1	1	220.746	50.7909	-0.156059	2		-1	-1	0	0	2	-1	-1	-1	-1	-1	-1
385.042	148.161	80.36	2	-1	1	213.048	52.0841	-0.155324	2		-1	-1	0	0	2	-1	-1	-1	-1	-1	-1
378.855	146.835	80.36	2	-1	1	206.727	50.7611	-0.16409	2		-1	-1	0	0	2	-1	-1	-1	-1	-1	-1
372.226	147.277	80.36	2	-1	1	199.934	51.1482	-0.166136	2		-1	-1	0	0	2	-1	-1	-1	-1	-1	-1
289.583	141.974	80.36	2	-1	1	115.695	43.7718	-0.238242	2		-1	-1	0	0	2	-1	-1	-1	-1	-1	-1
281.186	142.416	80.36	2	-1	1	107.136	43.8052	-0.239483	2		-1	-1	0	0	2	-1	-1	-1	-1	-1	-1
227.711	136.671	80.36	2	-1	1	53.3557	35.2869	-0.309352	2		-1	-1	0	0	2	-1	-1	-1	-1	-1	-1
220.64	137.113	80.36	2	-1	1	46.1956	35.2283	-0.308162	2		-1	-1	0	0	2	-1	-1	-1	-1	-1	-1
517.183	153.464	85.26	2	-1	1	347.517	55.3778	-0.165492	2		-1	-1	0	0	2	-1	-1	-1	-1	-1	-1
509.228	154.79	85.26	2	-1	1	339.555	56.9734	-0.162593	2		-1	-1	0	0	2	-1	-1	-1	-1	-1	-1
526.463	155.674	85.26	2	-1	1	356.927	57.1824	-0.155525	2		-1	-1	0	0	2	-1	-1	-1	-1	-1	-1
546.793	155.232	85.26	2	-1	1	377.316	55.9381	-0.153687	2		-1	-1	0	0	2	-1	-1	-1	-1	-1	-1
480.501	153.022	85.26	2	-1	1	310.507	56.2456	-0.178015	2		-1	-1	0	0	2	-1	-1	-1	-1	-1	-1
469.011	153.022	85.26	2	-1	1	298.873	56.6008	-0.182266	2		-1	-1	0	0	2	-1	-1	-1	-1	-1	-1
373.993	43.8627	73.5	2	-1	1	202.918	53.4794	-3.02897	2		-1	-1	0	0	2	-1	-1	-1	-1	-1	-1
367.364	43.8627	73.5	2	-1	1	196.443	53.5865	-3.02586	2		-1	-1	0	0	2	-1	-1	-1	-1	-1	-1
362.503	45.1886	73.5	2	-1	1	191.672	52.3554	-3.02179	2		-1	-1	0	0	2	-1	-1	-1	-1	-1	-1
355.432	45.6305	73.5	2	-1	1	184.751	52.0657	-3.01803	2		-1	-1	0	0	2	-1	-1	-1	-1	-1	-1
350.571	46.5144	73.5	2	-1	1	179.978	51.3012	-3.0146	2		-1	-1	0	0	2	-1	-1	-1	-1	-1	-1
341.732	46.5144	73.5	2	-1	1	171.331	51.5383	-3.01117	2		-1	-1	0	0	2	-1	-1	-1	-1	-1	-1
420.839	42.9789	73.5	2	-1	1	248.701	54.1518	-3.05478	2		-1	-1	0	0	2	-1	-1	-1	-1	-1	-1
427.91	41.653	73.5	2	-1	1	255.61	55.5253	-3.05968	2		-1	-1	0	0	2	-1	-1	-1	-1	-1	-1
290.466	57.5629	51.94	2	-1	1	120.392	45.2592	2.81643	2		-1	-1	0	0	2	-1	-1	-1	-1	-1	-1
282.069	57.5629	51.94	2	-1	1	112.162	45.6168	2.82104	2		-1	-1	0	0	2	-1	-1	-1	-1	-1	-1
417.304	48.2822	51.94	2	-1	1	244.629	52.376	2.81191	2		-1	-1	0	0	2	-1	-1	-1	-1	-1	-1
433.214	49.166	51.94	2	-1	1	260.243	51.8566	2.79804	2		-1	-1	0	0	2	-1	-1	-1	-1	-1	-1
438.517	48.7241	51.94	2	-1	1	265.448	52.3866	2.79888	2		-1	-1	0	0	2	-1	-1	-1	-1	-1	-1
295.328	77.4503	53.9	4	-1	1	124.279	26.3905	2.60849	2		-1	-1	0	0	2	-1	-1	-1	-1	-1	-1
284.279	77.4503	53.9	4	-1	1	113.37	26.7827	2.62224	2		-1	-1	0	0	2	-1	-1	-1	-1	-1	-1
278.092	78.7762	53.9	4	-1	1	107.193	25.9111	2.60275	2		-1	-1	0	0	2	-1	-1	-1	-1	-1	-1
271.463	78.7762	53.9	4	-1	1	100.645	26.1868	2.61115	2		-1	-1	0	0	2	-1	-1	-1	-1	-1	-1
266.16	80.5439	53.9	4	-1	1	95.3078	24.9503	2.57965	2		-1	-1	0	0	2	-1	-1	-1	-1	-1	-1
257.321	81.4278	53.9	4	-1	1	86.5194	24.6314	2.57135	2		-1	-1	0	0	2	-1	-1	-1	-1	-1	-1
250.692	81.8698	53.9	4	-1	1	79.9379	24.5933	2.57012	2		-1	-1	0	0	2	-1	-1	-1	-1	-1	-1
219.314	86.7311	53.9	4	-1	1	48.5728	22.4405	2.49125	2		-1	-1	0	0	2	-1	-1	-1	-1	-1	-1
396.091	74.7987	46.06	4	-1	1	223.609	32.966	2.35458	2		-1	-1	0	0	2	-1	-1	-1	-1	-1	-1
402.278	77.0084	46.06	4	-1	1	229.721	31.6492	2.29884	2		-1	-1	0	0	2	-1	-1	-1	-1	-1	-1
430.562	77.0084	46.06	4	-1	1	257.746	32.3992	2.28549	2		-1	-1	0	0	2	-1	-1	-1	-1	-1	-1
439.401	77.0084	46.06	4	-1	1	266.52	32.6749	2.28295	2		-1	-1	0	0	2	-1	-1	-1	-1	-1	-1
286.047	76.5665	70.56	4	-1	1	115.292	23.5733	-2.99701	2		-1	-1	0	0	2	-1	-1	-1	-1	-1	-1
291.35	76.1245	70.56	4	-1	1	120.569	23.7535	-2.99977	2		-1	-1	0	0	2	-1	-1	-1	-1	-1	-1
299.747	74.7987	70.56	4	-1	1	128.948	24.6813	-3.0071	2		-1	-1	0	0	2	-1	-1	-1	-1	-1	-1
311.68	74.7987	70.56	4	-1	1	140.765	24.1689	-3.01166	2		-1	-1	0	0	2	-1	-1	-1	-1	-1	-1
319.193	74.3567	70.56	4	-1	1	148.219	24.3136	-3.01696	2		-1	-1	0	0	2	-1	-1	-1	-1	-1	-1
324.938	73.4729	70.56	4	-1	1	153.936	24.9833	-3.02307	2		-1	-1	0	0	2	-1	-1	-1	-1	-1	-1
331.125	72.589	70.56	4	-1	1	160.086	25.6525	-3.02948	2		-1	-1	0	0	2	-1	-1	-1	-1	-1	-1
322.728	96.4538	47.04	5	-1	1	150.545	21.6931	1.70804	2		-1	-1	0	0	2	-1	-1	-1	-1	-1	-1
316.983	97.7797	47.04	5	-1	1	144.788	21.5242	1.65693	2		-1	-1	0	0	2	-1	-1	-1	-1	-1	-1
309.912	97.7797	47.04	5	-1	1	137.763	21.4346	1.67003	2		-1	-1	0	0	2	-1	-1	-1	-1	-1	-1
303.283	99.1055	47.04	5	-1	1	131.122	21.3157	1.62124	2		-1	-1	0	0	2	-1	-1	-1	-1	-1	-1
351.012	96.8958	47.04	5	-1	1	178.649	22.1751	1.6483	2		-1	-1	0	0	2	-1	-1	-1	-1	-1	-1
360.293	96.0119	47.04	5	-1	1	187.902	22.429	1.67844	2		-1	-1	0	0	2	-1	-1	-1	-1	-1	-1
368.69	96.4538	47.04	5	-1	1	196.252	22.611	1.65183	2		-1	-1	0	0	2	-1	-1	-1	-1	-1	-1
377.529	96.4538	47.04	5	-1	1	205.055	22.8417	1.64611	2		-1	-1	0	0	2	-1	-1	-1	-1	-1	-1
390.787	121.645	49.98	4	-1	1	218.201	31.8561	0.732678	2		-1	-1	0	0	2	-1	-1	-1	-1	-1	-1
397.858	119.435	49.98	4	-1	1	225.339	30.3457	0.783594	2		-1	-1	0	0	2	-1	-1	-1	-1	-1	-1
395.207	57.5629	75.46	3	-1	1	223.648	39.8	-2.97045	2		-1	-1	0	0	2	-1	-1	-1	-1	-1	-1
399.626	59.3307	75.46	3	-1	1	227.99	38.0182	-2.96784	2		-1	-1	0	0	2	-1	-1	-1	-1	-1	-1
444.262	58.8888	75.46	3	-1	1	271.945	38.624	-3.0047	2		-1	-1	0	0	2	-1	-1	-1	-1	-1	-1
447.798	58.8888	75.46	3	-1	1	275.431	38.671	-3.00753	2		-1	-1	0	0	2	-1	-1	-1	-1	-1	-1
453.101	58.8888	75.46	3	-1	1	280.663	38.75	-3.01175	2		-1	-1	0	0	2	-1	-1	-1	-1	-1	-1
457.962	58.8888	75.46	3	-1	1	285.461	38.8311	-3.01558	2		-1	-1	0	0	2	-1	-1	-1	-1	-1	-1
494.644	59.3307	75.46	3	-1	1	321.739	39.2407	-3.04167	2		-1	-1	0	0	2	-1	-1	-1	-1	-1	-1
500.389	58.8888	75.46	3	-1	1	327.417	39.8481	-3.04603	2		-1	-1	0	0	2	-1	-1	-1	-1	-1	-1
504.366	58.8888	75.46	3	-1	1	331.358	39.9677	-3.04853	2		-1	-1	0	0	2	-1	-1	-1	-1	-1	-1
511.437	58.8888	75.46	3	-1	1	338.368	40.1888	-3.05279	2		-1	-1	0	0	2	-1	-1	-1	-1	-1	-1
398.742	71.7051	93.1	3	-1	1	227.609	33.9445	-2.36947	2		-1	-1	0	0	2	-1	-1	-1	-1	-1	-1
393.439	71.7051	93.1	3	-1	1	222.356	34.0605	-2.36639	2		-1	-1	0	0	2	-1	-1	-1	-1	-1	-1
387.694	72.589	93.1	3	-1	1	216.658	33.5445	-2.34573	2		-1	-1	0	0	2	-1	-1	-1	-1	-1	-1
412.884	72.589	93.1	3	-1	1	241.615	33.0148	-2.36147	2		-1	-1	1	0	-1	-1	-1	-1	-1	-1	-1
406.255	79.66	93.1	4	-1	1	235.058	28.3283	-2.18722	2		-1	-1	1	0	-1	-1	-1	-1	-1	-1	-1
398.3	80.9859	93.1	4	-1	1	227.151	27.7305	-2.1443	2		-1	-1	1	0	-1	-1	-1	-1	-1	-1	-1
456.195	81.8698	93.1	4	-1	1	284.671	26.1233	-2.17199	2		-1	-1	1	0	-1	-1	-1	-1	-1	-1	-1
541.489	84.0795	93.1	4	-1	1	369.442	24.7745	-2.23196	2		-1	-1	1	0	-1	-1	-1	-1	-1	-1	-1
283.837	104.851	94.08	4	-1	1	111.856	26.3334	-1.34868	2		-1	-1	1	0	-1	-1	-1	-1	-1	-1	-1
295.328	103.083	94.08	4	-1	1	123.513	26.0455	-1.39347	2		-1	-1	1	0	-1	-1	-1	-1	-1	-1	-1
276.766	117.667	94.08	3	-1	1	104.052	31.0971	-0.945188	2		-1	-1	1	0	-1	-1	-1	-1	-1	-1	-1
240.969	121.645	94.08	3	-1	1	67.6482	32.1825	-0.897528	2		-1	-1	1	0	-1	-1	-1	-1	-1	-1	-1
218.872	140.648	94.08	1	-1	1	44.0298	44.694	-0.573703	2		-1	-1	1	0	-1	-1	-1	-1	-1	-1	-1
214.894	138.438	94.08	1	-1	1	40.1632	42.6683	-0.606679	2		-1	-1	1	0	-1	-1	-1	-1	-1	-1	-1
210.475	141.974	94.08	1	-1	1	35.4412	45.2414	-0.562743	2		-1	-1	1	0	-1	-1	-1	-1	-1	-1	-1
198.874	123.854	94.0856	2	-1	1	25.1276	31.4749	-0.908594	2		-1	-1	1	0	-1	-1	-1	-1	-1	-1	-1
198.874	105.735	98.505	2	-1	1	26.375	30.0364	-1.52078	2		-1	-1	1	0	-1	-1	-1	-1	-1	-1	-1
198.874	107.06	42.8203	2	-1	1	26.9826	25.6935	1.55228	2		-1	-1	1	0	-1	-1	-1	-1	-1	-1	-1
299.305	58.4468	46.06	2	-1	1	128.946	46.6009	2.68651	2		-1	-1	1	0	-1	-1	-1	-1	-1	-1	-1
290.024	61.5404	46.06	2	-1	1	119.72	44.2297	2.65953	2		-1	-1	1	0	-1	-1	-1	-1	-1	-1	-1
282.069	62.8663	46.06	2	-1	1	111.859	43.3899	2.64994	2		-1	-1	1	0	-1	-1	-1	-1	-1	-1	-1
303.725	139.764	46.06	2	-1	1	129.774	46.2212	0.547367	2		-1	-1	1	0	-1	-1	-1	-1	-1	-1	-1
209.149	136.229	46.06	1	-1	1	35.0959	38.5091	0.662669	2		-1	-1	1	0	-1	-1	-1	-1	-1	-1	-1
227.711	134.24	43.2623	1	-1	1	53.8021	39.5364	0.726789	2		-1	-1	1	0	-1	-1	-1	-1	-1	-1	-1
226.385	128.716	46.06	2	-1	1	52.8286	33.4571	0.767524	2		-1	-1	1	0	-1	-1	-1	-1	-1	-1	-1
189.593	101.757	45.9139	2	-1	1	18.0689	23.087	1.80395	2		-1	-1	1	0	-1	-1	-1	-1	-1	-1	-1
179.649	90.4876	46.06	1	-1	1	8.96037	27.9222	2.23772	2		-1	-1	1	0	-1	-1	-1	-1	-1	-1	-1
207.492	151.476	46.06	1	-1	1	32.3438	51.5703	0.492963	2		-1	-1	0	0	-1	-1	-1	-1	-1	-1	-1
191.913	152.801	46.06	1	-1	1	16.7101	51.8379	0.494708	2		-1	-1	0	0	-1	-1	-1	-1	-1	-1	-1
186.279	152.801	46.06	1	-1	1	11.0904	51.5043	0.499371	2		-1	-1	0	0	-1	-1	-1	-1	-1	-1	-1
155.453	146.835	46.06	1	-1	1	-19.2237	44.5071	0.587763	2		-1	-1	0	0	-1	-1	-1	-1	-1	-1	-1
144.515	135.566	43.9252	1	-1	1	-29.2952	36.3037	0.813908	2		-1	-1	0	0	-1	-1	-1	-1	-1	-1	-1
144.515	125.291	35.6388	1	-1	1	-28.4516	37.079	1.17324	2		-1	-1	0	0	-1	-1	-1	-1	-1	-1	-1
144.515	114.684	34.9758	1	-1	1	-27.6805	34.5828	1.46085	2		-1	-1	0	0	-1	-1	-1	-1	-1	-1	-1
144.515	98.4426	45.5825	1	-1	1	-26.6463	25.9784	2.04689	2		-1	-1	0	0	-1	-1	-1	-1	-1	-1	-1
144.515	90.8191	50.8858	1	-1	1	-26.165	26.0214	2.40581	2		-1	-1	0	0	-1	-1	-1	-1	-1	-1	-1
146.504	114.684	47.2397	1	-1	1	-25.8518	22.5489	1.37198	2		-1	-1	0	0	-1	-1	-1	-1	-1	-1	-1
144.515	114.684	53.5374	1	-1	1	-27.9148	16.4814	1.28951	2		-1	-1	0	0	-1	-1	-1	-1	-1	-1	-1
144.515	117.336	60.1665	1	-1	1	-28.1891	11.9716	0.894639	2		-1	-1	0	0	-1	-1	-1	-1	-1	-1	-1
149.818	123.302	42.9308	1	-1	1	-23.1115	29.7879	1.11653	2		-1	-1	0	0	2	-1	-1	-1	-1	-1	-1
148.493	127.611	59.1722	1	-1	1	-24.9487	20.9478	0.539843	2		-1	-1	0	0	-1	-1	-1	-1	-1	-1	-1
148.493	104.409	65.8013	1	-1	1	-23.3638	5.748	2.5723	2		-1	-1	0	0	-1	-1	-1	-1	-1	-1	-1
148.493	103.414	57.1834	1	-1	1	-23.1835	13.2078	2.05818	2		-1	-1	0	0	-1	-1	-1	-1	-1	-1	-1
148.493	99.437	63.8126	1	-1	1	-22.9811	11.0156	2.68374	2		-1	-1	0	0	-1	-1	-1	-1	-1	-1	-1
148.493	84.5214	54.5318	1	-1	1	-21.7912	28.5315	2.64869	2		-1	-1	0	0	-1	-1	-1	-1	-1	-1	-1
148.493	77.5608	46.5768	1	-1	1	-21.1902	38.6972	2.56313	2		-1	-1	0	0	-1	-1	-1	-1	-1	-1	-1
295.659	53.033	46.06	1	-1	1	125.619	51.5477	2.73884	2		-1	-1	0	0	-1	-1	-1	-1	-1	-1	-1
285.716	53.033	46.06	1	-1	1	115.906	51.9313	2.74429	2		-1	-1	0	0	-1	-1	-1	-1	-1	-1	-1
277.098	54.3589	46.06	1	-1	1	107.416	51.101	2.73787	2		-1	-1	0	0	-1	-1	-1	-1	-1	-1	-1
268.148	56.6791	46.06	1	-1	1	98.5379	49.4284	2.7225	2		-1	-1	0	0	-1	-1	-1	-1	-1	-1	-1
254.559	59.3307	46.06	1	-1	1	85.0741	47.7444	2.70536	2		-1	-1	0	0	-1	-1	-1	-1	-1	-1	-1
247.267	63.6397	46.06	1	-1	1	77.6643	44.3534	2.66495	2		-1	-1	0	0	-1	-1	-1	-1	-1	-1	-1
240.637	61.9824	46.06	1	-1	1	71.2553	46.1643	2.68684	2		-1	-1	0	0	-1	-1	-1	-1	-1	-1	-1
230.694	68.28	46.06	1	-1	1	61.0839	41.3135	2.62034	2		-1	-1	0	0	-1	-1	-1	-1	-1	-1	-1
225.722	65.6284	46.06	1	-1	1	56.3656	43.8712	2.65603	2		-1	-1	0	0	-1	-1	-1	-1	-1	-1	-1
215.115	69.2744	46.06	1	-1	1	45.6843	41.4234	2.61849	2		-1	-1	0	0	-1	-1	-1	-1	-1	-1	-1
207.492	70.6002	46.06	1	-1	1	38.0843	40.8018	2.60638	2		-1	-1	0	0	-1	-1	-1	-1	-1	-1	-1
212.464	74.2463	46.06	1	-1	1	42.7313	37.4953	2.54933	2		-1	-1	0	0	-1	-1	-1	-1	-1	-1	-1
400.068	38.449	47.04	1	-1	1	227.638	63.105	2.80377	2		-1	-1	0	0	-1	-1	-1	-1	-1	-1	-1
378.192	36.4602	47.04	1	-1	1	206.392	64.8672	2.82473	2		-1	-1	0	0	-1	-1	-1	-1	-1	-1	-1
364.271	36.7917	47.04	1	-1	1	192.884	64.6148	2.8292	2		-1	-1	0	0	-1	-1	-1	-1	-1	-1	-1
352.007	38.1175	47.04	1	-1	1	180.965	63.4981	2.82757	2		-1	-1	0	0	-1	-1	-1	-1	-1	-1	-1
335.765	38.449	47.04	1	-1	1	165.204	63.4626	2.83314	2		-1	-1	0	0	-1	-1	-1	-1	-1	-1	-1
319.193	40.4377	47.04	1	-1	1	149.056	62.0048	2.82959	2		-1	-1	0	0	-1	-1	-1	-1	-1	-1	-1
309.912	42.095	47.04	1	-1	1	139.976	60.735	2.82426	2		-1	-1	0	0	-1	-1	-1	-1	-1	-1	-1
301.625	43.4208	47.04	1	-1	1	131.862	59.779	2.82013	2		-1	-1	0	0	-1	-1	-1	-1	-1	-1	-1
291.019	44.0837	47.04	1	-1	1	121.507	59.5649	2.82077	2		-1	-1	0	0	-1	-1	-1	-1	-1	-1	-1
281.407	44.7466	47.04	1	-1	1	112.11	59.3538	2.82082	2		-1	-1	0	0	-1	-1	-1	-1	-1	-1	-1
270.137	48.0612	47.04	1	-1	1	100.945	56.7932	2.80474	2		-1	-1	0	0	-1	-1	-1	-1	-1	-1	-1
258.536	49.0556	47.04	1	-1	1	89.5558	56.4595	2.80295	2		-1	-1	0	0	-1	-1	-1	-1	-1	-1	-1
240.969	53.696	47.04	1	-1	1	72.0874	53.1622	2.77748	2		-1	-1	0	0	-1	-1	-1	-1	-1	-1	-1
222.739	59.6622	47.04	1	-1	1	53.8192	48.8595	2.73677	2		-1	-1	0	0	-1	-1	-1	-1	-1	-1	-1
207.16	63.6397	47.04	1	-1	1	38.2324	46.3347	2.70668	2		-1	-1	0	0	-1	-1	-1	-1	-1	-1	-1
201.194	63.6397	47.04	1	-1	1	32.3613	46.7449	2.70949	2		-1	-1	0	0	-1	-1	-1	-1	-1	-1	-1
191.913	65.9598	47.04	1	-1	1	22.9431	45.3426	2.6905	2		-1	-1	0	0	-1	-1	-1	-1	-1	-1	-1
182.633	66.2913	47.04	1	-1	1	13.6633	45.6949	2.69174	2		-1	-1	0	0	-1	-1	-1	-1	-1	-1	-1
229.368	150.481	47.04	1	-1	1	54.3403	51.5439	0.467427	2		-1	-1	0	0	-1	-1	-1	-1	-1	-1	-1
238.317	152.139	47.04	1	-1	1	63.2202	53.5763	0.449239	2		-1	-1	0	0	-1	-1	-1	-1	-1	-1	-1
248.924	153.796	47.04	1	-1	1	73.785	55.7076	0.432045	2		-1	-1	0	0	-1	-1	-1	-1	-1	-1	-1
255.884	150.15	47.04	1	-1	1	81.0175	52.7406	0.454834	2		-1	-1	0	0	-1	-1	-1	-1	-1	-1	-1
265.497	150.15	47.04	1	-1	1	90.6999	53.2597	0.450631	2		-1	-1	0	0	-1	-1	-1	-1	-1	-1	-1
281.075	150.15	47.04	1	-1	1	106.417	54.0668	0.445294	2		-1	-1	0	0	-1	-1	-1	-1	-1	-1	-1
289.03	151.476	47.04	1	-1	1	114.388	55.6828	0.434011	2		-1	-1	0	0	-1	-1	-1	-1	-1	-1	-1
315.215	153.133	49	1	-1	1	140.88	57.7218	0.388501	2		-1	-1	0	0	-1	-1	-1	-1	-1	-1	-1
322.839	152.801	49	1	-1	1	148.643	57.7232	0.390638	2		-1	-1	0	0	-1	-1	-1	-1	-1	-1	-1
335.103	154.459	49	1	-1	1	161.071	59.7484	0.382237	2		-1	-1	0	0	2	-1	-1	-1	-1	-1	-1
361.288	152.801	49	1	-1	1	187.83	59.0142	0.397011	2		-1	-1	0	0	-1	-1	-1	-1	-1	-1	-1
368.911	152.801	49	1	-1	1	195.617	59.2088	0.399269	2		-1	-1	0	0	-1	-1	-1	-1	-1	-1	-1
382.832	153.796	49	1	-1	1	209.835	60.4402	0.398328	2		-1	-1	0	0	-1	-1	-1	-1	-1	-1	-1
217.104	148.161	50.96	1	-1	1	42.1588	47.1544	0.421117	2		-1	-1	0	0	-1	-1	-1	-1	-1	-1	-1
208.155	148.493	50.96	1	-1	1	33.1618	46.9108	0.425552	2		-1	-1	0	0	-1	-1	-1	-1	-1	-1	-1
192.576	151.807	50.96	1	-1	1	17.3809	49.018	0.41275	2		-1	-1	0	0	-1	-1	-1	-1	-1	-1	-1
185.947	151.807	50.96	1	-1	1	10.7695	48.6037	0.417885	2		-1	-1	0	0	-1	-1	-1	-1	-1	-1	-1
201.526	136.892	50.8858	1	-1	1	27.3799	36.0761	0.553809	2		-1	-1	1	0	-1	-1	-1	-1	-1	-1	-1
168.711	152.139	50.96	1	-1	1	-6.44412	47.8393	0.429049	2		-1	-1	0	0	-1	-1	-1	-1	-1	-1	-1
190.587	145.509	50.96	1	-1	1	15.8504	43.0932	0.466846	2		-1	-1	0	0	-1	-1	-1	-1	-1	-1	-1
176.335	142.858	50.96	1	-1	1	1.82648	39.8524	0.508637	2		-1	-1	0	0	-1	-1	-1	-1	-1	-1	-1
167.386	142.526	50.96	1	-1	1	-7.07512	39.0349	0.522377	2		-1	-1	0	0	-1	-1	-1	-1	-1	-1	-1
160.425	137.223	50.96	1	-1	1	-13.6357	34.0402	0.60277	2		-1	-1	0	0	-1	-1	-1	-1	-1	-1	-1
154.459	147.83	50.96	1	-1	1	-20.3488	43.0243	0.479249	2		-1	-1	0	0	-1	-1	-1	-1	-1	-1	-1
137.223	141.2	50.96	1	-1	1	-37.0618	36.1596	0.576069	2		-1	-1	0	0	-1	-1	-1	-1	-1	-1	-1
141.2	133.577	50.96	1	-1	1	-32.5467	30.0445	0.69801	2		-1	-1	0	0	-1	-1	-1	-1	-1	-1	-1
117.999	139.875	50.96	1	-1	1	-56.1396	33.9858	0.62249	2		-1	-1	0	0	-1	-1	-1	-1	-1	-1	-1
125.291	130.925	50.96	1	-1	1	-48.2234	27.2667	0.78821	2		-1	-1	0	0	-1	-1	-1	-1	-1	-1	-1
105.735	124.628	50.96	1	-1	1	-67.2742	22.4252	1.0299	2		-1	-1	0	0	-1	-1	-1	-1	-1	-1	-1
89.4933	122.97	50.96	1	-1	1	-83.3531	21.1803	1.14612	2		-1	-1	0	0	-1	-1	-1	-1	-1	-1	-1
88.1674	111.038	50.96	1	-1	1	-83.8172	19.0605	1.74057	2		-1	-1	0	0	-1	-1	-1	-1	-1	-1	-1
203.183	68.9429	52.92	1	-1	1	33.8734	39.3148	2.78015	2		-1	-1	1	0	-1	-1	-1	-1	-1	-1	-1
215.447	66.6228	52.92	1	-1	1	46.1277	40.6042	2.79735	2		-1	-1	0	0	-1	-1	-1	-1	-1	-1	-1
226.053	65.6284	52.92	1	-1	1	56.6455	40.8259	2.80188	2		-1	-1	0	0	-1	-1	-1	-1	-1	-1	-1
235.997	60.6565	52.92	1	-1	1	66.7525	44.8366	2.83913	2		-1	-1	0	0	-1	-1	-1	-1	-1	-1	-1
248.261	58.0049	52.92	1	-1	1	78.9684	46.6011	2.8536	2		-1	-1	0	0	-1	-1	-1	-1	-1	-1	-1
260.193	56.3476	52.92	1	-1	1	90.7779	47.5029	2.86011	2		-1	-1	0	0	-1	-1	-1	-1	-1	-1	-1
258.205	48.0612	52.92	1	-1	1	89.2957	55.5155	2.90847	2		-1	-1	0	0	-1	-1	-1	-1	-1	-1	-1
200.2	60.3251	52.92	1	-1	1	31.5384	47.5508	2.85276	2		-1	-1	0	0	-1	-1	-1	-1	-1	-1	-1
187.604	64.9655	52.92	1	-1	1	18.643	44.1055	2.82166	2		-1	-1	0	0	-1	-1	-1	-1	-1	-1	-1
167.717	70.6002	52.92	1	-1	1	-1.59657	40.316	2.77869	2		-1	-1	0	0	-1	-1	-1	-1	-1	-1	-1
169.706	62.3138	52.92	1	-1	1	0.982798	47.8756	2.84654	2		-1	-1	0	0	-1	-1	-1	-1	-1	-1	-1
153.796	67.2857	52.92	1	-1	1	-15.2422	44.3686	2.81355	2		-1	-1	0	0	-1	-1	-1	-1	-1	-1	-1
137.886	74.5777	52.92	1	-1	1	-31.6341	38.8064	2.75108	2		-1	-1	0	0	-1	-1	-1	-1	-1	-1	-1
199.537	151.807	59.78	1	-1	1	24.2116	47.0546	0.231014	2		-1	-1	0	0	-1	-1	-1	-1	-1	-1	-1
188.267	152.139	59.78	1	-1	1	12.9483	46.6099	0.235931	2		-1	-1	0	0	-1	-1	-1	-1	-1	-1	-1
178.987	152.139	59.78	1	-1	1	3.69227	45.9774	0.241198	2		-1	-1	0	0	-1	-1	-1	-1	-1	-1	-1
168.048	150.813	59.78	1	-1	1	-7.12125	43.939	0.253645	2		-1	-1	0	0	-1	-1	-1	-1	-1	-1	-1
158.105	147.498	59.78	1	-1	1	-16.8	40.042	0.277513	2		-1	-1	0	0	-1	-1	-1	-1	-1	-1	-1
213.789	153.133	59.78	1	-1	1	38.3828	49.3289	0.218685	2		-1	-1	0	0	-1	-1	-1	-1	-1	-1	-1
215.447	148.824	59.78	1	-1	1	40.355	45.2123	0.234263	2		-1	-1	0	0	-1	-1	-1	-1	-1	-1	-1
220.75	151.144	59.78	1	-1	1	45.5254	47.8414	0.222567	2		-1	-1	0	0	-1	-1	-1	-1	-1	-1	-1
235.003	153.464	59.78	1	-1	1	59.7234	51.0503	0.208977	2		-1	-1	0	0	-1	-1	-1	-1	-1	-1	-1
257.21	153.133	59.78	1	-1	1	82.1669	52.0879	0.204113	2		-1	-1	0	0	-1	-1	-1	-1	-1	-1	-1
131.257	130.262	59.78	1	-1	1	-42.3368	22.023	0.493998	2		-1	-1	0	0	-1	-1	-1	-1	-1	-1	-1
110.044	130.925	59.78	1	-1	1	-63.5411	21.3693	0.522856	2		-1	-1	0	0	-1	-1	-1	-1	-1	-1	-1
99.437	96.4538	59.78	1	-1	1	-71.6403	18.9754	2.63302	2		-1	-1	0	0	-1	-1	-1	-1	-1	-1	-1
83.8585	103.083	59.78	1	-1	1	-87.6539	14.7203	2.42401	2		-1	-1	0	0	-1	-1	-1	-1	-1	-1	-1
93.8022	117.999	59.78	1	-1	1	-78.8094	11.1605	1.1586	2		-1	-1	0	0	-1	-1	-1	-1	-1	-1	-1
101.757	138.217	59.78	1	-1	1	-72.3298	27.5105	0.414542	2		-1	-1	0	0	-1	-1	-1	-1	-1	-1	-1
341.069	47.3983	60.76	2	-1	1	170.394	51.1495	3.02296	2		-1	-1	0	0	-1	-1	-1	-1	-1	-1	-1
342.395	54.0274	60.76	2	-1	1	171.515	44.5918	2.99829	2		-1	-1	0	0	-1	-1	-1	-1	-1	-1	-1
336.097	51.0443	60.76	2	-1	1	165.435	47.6774	3.01323	2		-1	-1	1	0	-1	-1	-1	-1	-1	-1	-1
347.366	48.3927	60.76	2	-1	1	176.519	50.0302	3.01656	2		-1	-1	0	0	-1	-1	-1	-1	-1	-1	-1
282.401	56.3476	60.76	2	-1	1	112.611	44.4516	3.01759	2		-1	-1	0	0	-1	-1	-1	-1	-1	-1	-1
276.766	57.342	60.76	2	-1	1	107.026	43.7497	3.01574	2		-1	-1	1	0	-1	-1	-1	-1	-1	-1	-1
231.688	134.903	60.76	2	-1	1	57.6169	32.4742	0.274312	2		-1	-1	1	0	-1	-1	-1	-1	-1	-1	-1
195.559	130.262	60.76	2	-1	1	21.7818	25.669	0.352385	2		-1	-1	0	0	-1	-1	-1	-1	-1	-1	-1
200.863	130.925	60.76	2	-1	1	27.0232	26.6454	0.338152	2		-1	-1	0	0	-1	-1	-1	-1	-1	-1	-1
207.492	133.246	60.76	2	-1	1	33.4737	29.3069	0.307906	2		-1	-1	0	0	-1	-1	-1	-1	-1	-1	-1
213.789	132.583	60.76	2	-1	1	39.8288	29.0809	0.307354	2		-1	-1	0	0	-1	-1	-1	-1	-1	-1	-1
219.424	133.577	60.76	2	-1	1	45.4057	30.4061	0.29368	2		-1	-1	0	0	-1	-1	-1	-1	-1	-1	-1
224.728	133.908	60.76	2	-1	1	50.7003	31.0677	0.28667	2		-1	-1	0	0	-1	-1	-1	-1	-1	-1	-1
176.003	124.959	60.76	2	-1	1	2.65942	19.4914	0.46856	2		-1	-1	0	0	2	-1	-1	-1	-1	-1	-1
180.975	125.622	60.76	2	-1	1	7.57032	20.4001	0.445244	2		-1	-1	0	0	2	-1	-1	-1	-1	-1	-1
188.93	127.942	60.76	2	-1	1	15.3372	23.0521	0.39246	2		-1	-1	0	0	2	-1	-1	-1	-1	-1	-1
178.655	84.8529	68.6	2	-1	1	8.08936	22.0433	-3.10215	2		-1	-1	0	0	2	-1	-1	-1	-1	-1	-1
172.689	91.1505	67.62	2	-1	1	1.69852	16.2326	3.11374	2		-1	-1	0	0	2	-1	-1	-1	-1	-1	-1
231.025	129.599	70.56	3	-1	1	57.2395	26.3953	-0.0473992	2		-1	-1	0	0	2	-1	-1	-1	-1	-1	-1
234.671	130.594	70.56	3	-1	1	60.8381	27.6247	-0.0441404	2		-1	-1	0	0	2	-1	-1	-1	-1	-1	-1
237.986	130.594	70.56	3	-1	1	64.1709	27.8409	-0.044107	2		-1	-1	0	0	2	-1	-1	-1	-1	-1	-1
246.604	129.931	70.56	3	-1	1	72.8821	27.7295	-0.0457038	2		-1	-1	0	0	2	-1	-1	-1	-1	-1	-1
252.57	129.931	70.56	3	-1	1	78.887	28.0958	-0.0449794	2		-1	-1	0	0	2	-1	-1	-1	-1	-1	-1
258.536	130.594	70.56	3	-1	1	84.8555	29.1106	-0.0419882	2		-1	-1	0	0	2	-1	-1	-1	-1	-1	-1
207.492	80.5439	73.5	3	-1	1	37.0776	24.8122	-2.88743	2		-1	-1	0	0	2	-1	-1	-1	-1	-1	-1
218.098	76.8979	73.5	3	-1	1	47.8642	27.674	-2.9054	2		-1	-1	0	0	2	-1	-1	-1	-1	-1	-1
223.402	76.5665	73.5	3	-1	1	53.151	27.6536	-2.90367	2		-1	-1	0	0	2	-1	-1	-1	-1	-1	-1
229.368	76.5665	73.5	3	-1	1	59.0729	27.272	-2.89941	2		-1	-1	0	0	2	-1	-1	-1	-1	-1	-1
235.997	75.2406	73.5	3	-1	1	65.7372	28.1541	-2.90442	2		-1	-1	0	0	2	-1	-1	-1	-1	-1	-1
270.8	67.9486	73.5	3	-1	1	100.652	33.2886	-2.93451	2		-1	-1	0	0	2	-1	-1	-1	-1	-1	-1
275.44	66.6228	73.5	3	-1	1	105.312	34.3478	-2.94029	2		-1	-1	0	0	2	-1	-1	-1	-1	-1	-1
282.732	65.9598	73.5	3	-1	1	112.555	34.6247	-2.94297	2		-1	-1	0	0	2	-1	-1	-1	-1	-1	-1
228.705	86.5101	89.18	3	-1	1	57.6576	26.9531	-2.20218	2		-1	-1	0	0	2	-1	-1	-1	-1	-1	-1
233.014	84.5214	89.18	3	-1	1	62.0911	28.0691	-2.2488	2		-1	-1	0	0	2	-1	-1	-1	-1	-1	-1
233.014	118.33	91.14	3	-1	1	59.8583	27.5537	-0.94587	2		-1	-1	0	0	2	-1	-1	-1	-1	-1	-1
238.317	119.656	91.14	3	-1	1	65.1152	28.5286	-0.897485	2		-1	-1	0	0	2	-1	-1	-1	-1	-1	-1
298.974	80.2125	69.58	5	-1	1	127.932	19.2475	-3.03199	2		-1	-1	0	0	2	-1	-1	-1	-1	-1	-1
311.238	78.2237	69.58	5	-1	1	140.178	20.7043	-3.04432	2		-1	-1	0	0	2	-1	-1	-1	-1	-1	-1
322.176	78.2237	69.58	5	-1	1	151.02	20.2837	-3.05166	2		-1	-1	0	0	2	-1	-1	-1	-1	-1	-1
334.108	76.235	69.58	5	-1	1	162.907	21.8671	-3.06506	2		-1	-1	0	0	2	-1	-1	-1	-1	-1	-1
343.72	75.5721	69.58	5	-1	1	172.443	22.2501	-3.07455	2		-1	-1	0	0	2	-1	-1	-1	-1	-1	-1
352.007	74.5777	69.58	5	-1	1	180.668	23.0364	-3.08343	2		-1	-1	0	0	2	-1	-1	-1	-1	-1	-1
368.911	73.9148	69.58	5	-1	1	197.403	23.3743	-3.10147	2		-1	-1	0	0	2	-1	-1	-1	-1	-1	-1
269.143	84.19	69.58	5	-1	1	98.1151	16.7872	-3.00878	2		-1	-1	0	0	2	-1	-1	-1	-1	-1	-1
255.884	85.1843	71.54	5	-1	1	84.8842	16.8451	-2.88952	2		-1	-1	0	0	2	-1	-1	-1	-1	-1	-1
246.935	85.5158	71.54	6	-1	1	75.9654	17.0469	-2.89245	2		-1	-1	0	0	2	-1	-1	-1	-1	-1	-1
326.153	83.1956	61.74	6	-1	1	154.656	16.68	2.75398	2		-1	-1	0	0	2	-1	-1	-1	-1	-1	-1
312.895	84.5214	61.74	6	-1	1	141.46	15.829	2.74411	2		-1	-1	0	0	2	-1	-1	-1	-1	-1	-1
300.3	85.8472	61.74	6	-1	1	128.91	15.0378	2.73131	2		-1	-1	0	0	2	-1	-1	-1	-1	-1	-1
286.378	86.8416	61.74	6	-1	1	115.048	14.6701	2.72931	2		-1	-1	0	0	2	-1	-1	-1	-1	-1	-1
275.109	107.392	61.74	6	-1	1	102.773	9.29728	0.799906	2		-1	-1	0	0	2	-1	-1	-1	-1	-1	-1
268.811	101.757	61.74	6	-1	1	96.7933	6.39856	1.48891	2		-1	-1	0	0	2	-1	-1	-1	-1	-1	-1
275.44	97.1168	61.74	6	-1	1	103.65	7.26155	2.11223	2		-1	-1	0	0	2	-1	-1	-1	-1	-1	-1
281.075	100.763	61.74	6	-1	1	109.075	6.42507	1.54253	2		-1	-1	0	0	2	-1	-1	-1	-1	-1	-1
257.873	98.4426	61.74	6	-1	1	86.083	7.0598	2.07269	2		-1	-1	0	0	2	-1	-1	-1	-1	-1	-1
250.913	107.723	61.74	6	-1	1	78.5906	8.53065	0.880887	2		-1	-1	0	0	2	-1	-1	-1	-1	-1	-1
337.091	97.7797	61.74	6	-1	1	165.072	7.16952	1.6469	2		-1	-1	0	0	2	-1	-1	-1	-1	-1	-1
394.765	91.1505	64.68	6	-1	1	222.77	8.18565	2.41734	2		-1	-1	0	0	2	-1	-1	-1	-1	-1	-1
407.692	91.1505	64.68	6	-1	1	235.653	8.44447	2.38343	2		-1	-1	0	0	2	-1	-1	-1	-1	-1	-1
373.551	90.1562	64.68	6	-1	1	201.648	8.71089	2.56075	2		-1	-1	0	0	2	-1	-1	-1	-1	-1	-1
363.939	90.4876	64.68	6	-1	1	192.072	8.41772	2.57216	2		-1	-1	0	0	2	-1	-1	-1	-1	-1	-1
221.744	87.836	64.68	6	-1	1	50.8176	16.3898	2.96824	2		-1	-1	0	0	2	-1	-1	-1	-1	-1	-1
210.143	90.4876	64.68	6	-1	1	39.1109	14.6229	2.93347	2		-1	-1	0	0	2	-1	-1	-1	-1	-1	-1
197.88	94.4651	64.68	6	-1	1	26.6207	11.7034	2.85483	2		-1	-1	0	0	2	-1	-1	-1	-1	-1	-1
139.543	98.4426	48.02	1	-1	1	-31.6357	24.0119	2.10208	2		-1	-1	0	0	2	-1	-1	-1	-1	-1	-1
175.009	104.74	41.16	1	-1	1	3.36921	27.7148	1.70184	2		-1	-1	0	0	2	-1	-1	-1	-1	-1	-1
331.125	138.217	41.16	2	-1	1	157.415	48.6003	0.648169	2		-1	-1	0	0	2	-1	-1	-1	-1	-1	-1
337.423	137.223	41.16	2	-1	1	163.808	48.0176	0.659635	2		-1	-1	0	0	2	-1	-1	-1	-1	-1	-1
342.726	138.549	41.16	2	-1	1	169.129	49.2933	0.644059	2		-1	-1	0	0	2	-1	-1	-1	-1	-1	-1
349.024	137.886	41.16	2	-1	1	175.517	48.9627	0.652066	2		-1	-1	0	0	2	-1	-1	-1	-1	-1	-1
354.327	139.875	41.16	2	-1	1	180.838	50.7791	0.630178	2		-1	-1	0	0	2	-1	-1	-1	-1	-1	-1
360.625	138.549	41.16	2	-1	1	187.247	49.8766	0.645913	2		-1	-1	0	0	2	-1	-1	-1	-1	-1	-1
365.928	138.88	41.16	2	-1	1	192.615	50.3064	0.643219	2		-1	-1	0	0	2	-1	-1	-1	-1	-1	-1
372.226	138.88	41.16	2	-1	1	199	50.4819	0.644748	2		-1	-1	0	0	2	-1	-1	-1	-1	-1	-1
388.136	140.206	41.16	2	-1	1	215.135	51.9689	0.635335	2		-1	-1	0	0	2	-1	-1	-1	-1	-1	-1
392.776	140.538	41.16	2	-1	1	219.847	52.3428	0.633599	2		-1	-1	0	0	2	-1	-1	-1	-1	-1	-1
214.452	122.97	41.16	2	-1	1	41.3741	32.8643	1.01562	2		-1	-1	0	0	2	-1	-1	-1	-1	-1	-1
220.419	121.976	41.16	2	-1	1	47.3806	32.4924	1.02929	2		-1	-1	0	0	2	-1	-1	-1	-1	-1	-1
225.059	123.633	41.16	2	-1	1	51.8878	33.5904	0.979931	2		-1	-1	0	0	2	-1	-1	-1	-1	-1	-1
232.02	124.296	41.16	2	-1	1	58.7772	34.2318	0.95268	2		-1	-1	0	0	2	-1	-1	-1	-1	-1	-1
249.918	129.931	42.14	2	-1	1	76.2734	38.0361	0.795058	2		-1	-1	0	0	2	-1	-1	-1	-1	-1	-1
243.952	129.599	42.14	2	-1	1	70.3338	37.5368	0.808114	2		-1	-1	0	0	2	-1	-1	-1	-1	-1	-1
340.406	141.532	50.96	2	-1	1	166.9	47.1635	0.435167	2		-1	-1	0	0	2	-1	-1	-1	-1	-1	-1
344.715	139.543	50.96	2	-1	1	171.326	45.4787	0.452695	2		-1	-1	0	0	2	-1	-1	-1	-1	-1	-1
362.945	142.526	50.96	2	-1	1	189.77	48.7747	0.432891	2		-1	-1	0	0	2	-1	-1	-1	-1	-1	-1
368.911	139.875	50.96	2	-1	1	195.881	46.489	0.456744	2		-1	-1	0	0	2	-1	-1	-1	-1	-1	-1
377.198	140.869	50.96	2	-1	1	204.289	47.5956	0.451597	2		-1	-1	0	0	2	-1	-1	-1	-1	-1	-1
457.079	154.127	75.46	2	-1	1	286.5	56.6294	-0.0133144	2		-1	-1	0	0	2	-1	-1	-1	-1	-1	-1
449.124	151.144	75.46	2	-1	1	278.35	53.8174	-0.020672	2		-1	-1	0	0	2	-1	-1	-1	-1	-1	-1
473.983	155.785	75.46	2	-1	1	303.711	57.8732	-0.00378854	2		-1	-1	0	0	3	-1	-1	-1	-1	-1	-1
464.702	154.459	75.46	2	-1	1	294.256	56.7847	-0.00927547	2		-1	-1	0	0	3	-1	-1	-1	-1	-1	-1
439.511	152.139	75.46	2	-1	1	268.578	54.982	-0.0245981	2		-1	-1	0	0	3	-1	-1	-1	-1	-1	-1
493.539	157.11	75.46	2	-1	1	323.562	58.633	0.00553419	2		-1	-1	0	0	3	-1	-1	-1	-1	-1	-1
485.584	156.447	75.46	2	-1	1	315.489	58.2109	0.00180317	2		-1	-1	0	0	3	-1	-1	-1	-1	-1	-1
287.373	100.431	120.54	1	-1	1	115.855	52.3455	-1.51864	2		-1	-1	0	0	2	-1	-1	-1	-1	-1	-1
270.8	101.094	120.54	1	-1	1	99.0408	52.4447	-1.52268	2		-1	-1	0	0	2	-1	-1	-1	-1	-1	-1
262.182	109.381	120.54	1	-1	1	89.836	53.0809	-1.37586	2		-1	-1	0	0	2	-1	-1	-1	-1	-1	-1
251.575	111.038	120.54	1	-1	1	78.9774	53.2476	-1.35703	2		-1	-1	0	0	2	-1	-1	-1	-1	-1	-1
244.283	112.032	120.54	1	-1	1	71.5201	53.3269	-1.34712	2		-1	-1	0	0	2	-1	-1	-1	-1	-1	-1
327.479	133.577	120.54	1	-1	1	155.332	62.6765	-0.930245	2		-1	-1	0	0	2	-1	-1	-1	-1	-1	-1
179.649	78.2237	95.06	1	-1	1	9.2238	38.892	-2.35163	2		-1	-1	0	0	2	-1	-1	-1	-1	-1	-1
190.919	74.9092	95.06	1	-1	1	20.7016	40.8551	-2.39039	2		-1	-1	0	0	2	-1	-1	-1	-1	-1	-1
391.782	30.8255	84.28	1	-1	1	220.663	67.6881	-2.89016	2		-1	-1	0	0	-1	-1	-1	-1	-1	-1	-1
366.259	32.8142	84.28	1	-1	1	195.81	66.1581	-2.87448	2		-1	-1	0	0	-1	-1	-1	-1	-1	-1	-1
345.709	34.14	84.28	1	-1	1	175.761	65.3908	-2.86403	2		-1	-1	0	0	-1	-1	-1	-1	-1	-1	-1
334.44	36.7917	84.28	1	-1	1	164.691	63.1729	-2.85173	2		-1	-1	0	0	-1	-1	-1	-1	-1	-1	-1
391.119	37.786	90.16	1	-1	1	220.149	62.5164	-2.77459	2		-1	-1	0	0	-1	-1	-1	-1	-1	-1	-1
407.36	37.1231	90.16	1	-1	1	236	62.9683	-2.78494	2		-1	-1	0	0	-1	-1	-1	-1	-1	-1	-1
422.939	36.1288	90.16	1	-1	1	251.2	63.8436	-2.79704	2		-1	-1	0	0	-1	-1	-1	-1	-1	-1	-1
373.883	38.1175	90.16	1	-1	1	203.321	62.504	-2.76642	2		-1	-1	0	0	-1	-1	-1	-1	-1	-1	-1
355.321	39.7748	90.16	1	-1	1	185.155	61.3926	-2.75197	2		-1	-1	0	0	-1	-1	-1	-1	-1	-1	-1
337.423	40.7692	90.16	1	-1	1	167.613	61.0121	-2.74269	2		-1	-1	0	0	-1	-1	-1	-1	-1	-1	-1
317.867	44.4152	90.16	1	-1	1	148.31	58.3363	-2.71884	2		-1	-1	0	0	-1	-1	-1	-1	-1	-1	-1
388.136	160.756	90.16	1	-1	1	216.414	66.7422	-0.260799	2		-1	-1	0	0	-1	-1	-1	-1	-1	-1	-1
394.433	155.785	90.16	1	-1	1	222.923	61.9903	-0.281777	2		-1	-1	0	0	-1	-1	-1	-1	-1	-1	-1
409.017	159.762	90.16	1	-1	1	237.904	65.6536	-0.255996	2		-1	-1	0	0	-1	-1	-1	-1	-1	-1	-1
382.501	158.105	90.16	1	-1	1	210.63	64.2233	-0.27579	2		-1	-1	0	0	-1	-1	-1	-1	-1	-1	-1
374.214	158.436	90.16	1	-1	1	202.088	64.5202	-0.278061	2		-1	-1	0	0	-1	-1	-1	-1	-1	-1	-1
365.265	159.431	90.16	1	-1	1	192.844	65.4075	-0.277413	2		-1	-1	0	0	-1	-1	-1	-1	-1	-1	-1
362.945	156.116	90.16	1	-1	1	190.513	62.2511	-0.295308	2		-1	-1	0	0	-1	-1	-1	-1	-1	-1	-1
350.018	156.779	90.16	1	-1	1	177.179	62.7181	-0.298044	2		-1	-1	0	0	-1	-1	-1	-1	-1	-1	-1
337.091	153.133	90.16	1	-1	1	163.974	59.0651	-0.32521	2		-1	-1	0	0	-1	-1	-1	-1	-1	-1	-1
328.142	152.47	90.16	1	-1	1	154.797	58.2425	-0.333881	2		-1	-1	0	0	-1	-1	-1	-1	-1	-1	-1
186.941	140.206	90.16	1	-1	1	12.1006	40.0323	-0.525135	2		-1	-1	0	0	-1	-1	-1	-1	-1	-1	-1
178.987	138.88	90.16	1	-1	1	4.26227	38.3927	-0.549553	2		-1	-1	0	0	-1	-1	-1	-1	-1	-1	-1
164.402	117.336	91.14	1	-1	1	-8.74583	24.1055	-1.13208	2		1	-1	0	0	-1	-1	-1	-1	-1	-1	-1
159.431	134.571	91.14	1	-1	1	-14.944	34.2797	-0.660752	2		-1	-1	0	0	-1	-1	-1	-1	-1	-1	-1
130.594	141.532	91.14	1	-1	1	-44.2043	37.9122	-0.569972	2		-1	-1	0	0	-1	-1	-1	-1	-1	-1	-1
261.519	69.2744	87.22	2	-1	1	91.4199	37.3245	-2.55821	2		-1	-1	1	0	-1	-1	-1	-1	-1	-1	-1
250.581	71.2632	90.1705	2	-1	1	80.4293	37.8248	-2.47271	2		-1	-1	1	0	-1	-1	-1	-1	-1	-1	-1
246.272	71.2632	87.22	2	-1	1	76.1472	36.3993	-2.54288	2		-1	-1	1	0	-1	-1	-1	-1	-1	-1	-1
216.773	76.8979	87.22	2	-1	1	46.4215	33.2143	-2.48849	2		-1	-1	1	0	-1	-1	-1	-1	-1	-1	-1
310.575	144.184	84.8672	2	-1	1	137.036	48.1004	-0.305468	2		-1	-1	1	0	-1	-1	-1	-1	-1	-1	-1
299.305	142.858	82.32	2	-1	1	125.568	45.6027	-0.269412	2		-1	-1	1	0	-1	-1	-1	-1	-1	-1	-1
272.126	142.526	82.32	2	-1	1	97.9357	44.0519	-0.285674	2		-1	-1	1	0	-1	-1	-1	-1	-1	-1	-1
299.637	52.0387	77.42	2	-1	1	129.908	48.1864	-2.90793	2		-1	-1	1	0	-1	-1	-1	-1	-1	-1	-1
326.485	59.9936	77.42	3	-1	1	156.036	39.3052	-2.87478	2		-1	-1	1	0	-1	-1	-1	-1	-1	-1	-1
260.193	55.6847	82.32	1	-1	1	90.8666	47.8531	-2.79476	2		-1	-1	1	0	-1	-1	-1	-1	-1	-1	-1
160.756	113.69	72.52	1	-1	1	-11.8849	6.49726	-0.538809	2		2	-1	0	0	-1	-1	-1	-1	-1	-1	-1
166.06	113.027	72.52	1	-1	1	-6.54804	6.30384	-0.572205	2		2	-1	0	0	-1	-1	-1	-1	-1	-1	-1
160.425	118.661	72.52	1	-1	1	-12.573	10.9599	-0.287565	2		2	-1	0	0	-1	-1	-1	-1	-1	-1	-1
159.099	124.959	72.52	1	-1	1	-14.3482	16.9259	-0.166971	2		-1	-1	0	0	-1	-1	-1	-1	-1	-1	-1
167.386	123.965	72.52	1	-1	1	-6.01238	16.5618	-0.178217	2		-1	-1	0	0	-1	-1	-1	-1	-1	-1	-1
162.082	106.398	72.52	1	-1	1	-10.0381	3.99098	-1.97994	2		2	-1	0	0	-1	-1	-1	-1	-1	-1	-1
162.082	100.763	72.52	1	-1	1	-9.63291	8.19626	-2.64273	2		2	-1	0	0	-1	-1	-1	-1	-1	-1	-1
162.745	94.4651	72.52	1	-1	1	-8.51886	14.0705	-2.83752	2		2	-1	0	0	-1	-1	-1	-1	-1	-1	-1
170.7	92.1449	72.52	1	-1	1	-0.418274	15.7843	-2.8596	2		-1	-1	0	0	-1	-1	-1	-1	-1	-1	-1
167.717	88.8303	72.52	1	-1	1	-3.15505	19.2174	-2.90451	2		-1	-1	0	0	-1	-1	-1	-1	-1	-1	-1
174.346	85.1843	72.52	1	-1	1	3.7186	22.3415	-2.9278	2		-1	-1	0	0	-1	-1	-1	-1	-1	-1	-1
176.666	89.1618	72.52	1	-1	1	5.74655	18.285	-2.88825	2		-1	-1	0	0	-1	-1	-1	-1	-1	-1	-1
184.953	86.1787	72.52	2	-1	1	14.2254	20.6386	-2.9071	2		-1	-1	0	0	-1	-1	-1	-1	-1	-1	-1
185.284	79.881	72.52	1	-1	1	15.0089	26.8112	-2.9509	2		-1	-1	0	0	-1	-1	-1	-1	-1	-1	-1
176.666	77.8923	72.52	1	-1	1	6.55703	29.3753	-2.96744	2		-1	-1	0	0	-1	-1	-1	-1	-1	-1	-1
185.284	74.2463	72.52	1	-1	1	15.4141	32.3824	-2.97609	2		-1	-1	0	0	-1	-1	-1	-1	-1	-1	-1
193.902	72.2575	72.52	1	-1	1	24.152	33.7495	-2.97772	2		-1	-1	0	0	-1	-1	-1	-1	-1	-1	-1
203.846	68.943	72.52	1	-1	1	34.2927	36.3381	-2.98276	2		-1	-1	0	0	-1	-1	-1	-1	-1	-1	-1
144.846	114.352	75.46	1	-1	1	-27.8371	8.01443	-0.863966	2		1	-1	0	0	-1	-1	-1	-1	-1	-1	-1
144.184	122.307	75.46	1	-1	1	-29.0703	14.293	-0.413098	2		1	-1	0	0	-1	-1	-1	-1	-1	-1	-1
150.481	126.616	75.46	1	-1	1	-23.0994	18.702	-0.304346	2		1	-1	0	0	-1	-1	-1	-1	-1	-1	-1
162.414	131.257	75.46	1	-1	1	-11.5325	23.9733	-0.231862	2		-1	-1	0	0	-1	-1	-1	-1	-1	-1	-1
161.419	142.195	75.46	1	-1	1	-13.3108	34.5257	-0.145565	2		-1	-1	0	0	-1	-1	-1	-1	-1	-1	-1
161.088	151.144	75.46	1	-1	1	-14.285	43.2999	-0.106501	2		-1	-1	0	0	-1	-1	-1	-1	-1	-1	-1
172.026	144.515	75.46	1	-1	1	-2.89941	37.5754	-0.133569	2		-1	-1	0	0	-1	-1	-1	-1	-1	-1	-1
150.15	138.88	75.46	1	-1	1	-24.3119	30.4631	-0.166558	2		-1	-1	0	0	-1	-1	-1	-1	-1	-1	-1
142.858	147.498	75.46	1	-1	1	-32.2043	38.3775	-0.120002	2		-1	-1	0	0	-1	-1	-1	-1	-1	-1	-1
123.302	140.538	75.46	1	-1	1	-51.2074	30.1217	-0.157423	2		1	-1	0	0	-1	-1	-1	-1	-1	-1	-1
118.993	117.004	75.46	1	-1	1	-53.8124	8.2821	-0.764613	2		1	-1	0	0	-1	-1	-1	-1	-1	-1	-1
162.414	90.4876	30.004	1	-1	1	-8.02668	42.6974	2.03669	2		-1	-1	0	0	-1	-1	-1	-1	-1	-1	-1
162.414	101.426	28.0153	1	-1	1	-8.78822	41.4459	1.77435	2		-1	-1	0	0	-1	-1	-1	-1	-1	-1	-1
162.414	129.931	30.9984	1	-1	1	-10.8759	43.7382	1.09428	2		-1	-1	0	0	-1	-1	-1	-1	-1	-1	-1
162.414	125.291	39.9477	1	-1	1	-10.6551	33.672	1.08136	2		-1	-1	0	0	-1	-1	-1	-1	-1	-1	-1
163.74	130.262	44.5881	1	-1	1	-9.74899	32.9287	0.876493	2		-1	-1	0	0	-1	-1	-1	-1	-1	-1	-1
162.414	68.28	66.1328	1	-1	1	-6.88564	39.8368	3.11616	2		-1	-1	0	0	-1	-1	-1	-1	-1	-1	-1
162.414	63.6397	74.0877	1	-1	1	-6.65234	44.6731	-2.98049	2		-1	-1	0	0	-1	-1	-1	-1	-1	-1	-1
162.414	79.2181	52.8745	1	-1	1	-7.50492	32.9863	2.67656	2		-1	-1	0	0	-1	-1	-1	-1	-1	-1	-1
162.414	77.2294	38.2904	1	-1	1	-7.17779	43.4325	2.40111	2		-1	-1	0	0	-1	-1	-1	-1	-1	-1	-1
162.414	92.4764	41.2735	1	-1	1	-8.31197	31.7408	2.12609	2		-1	-1	0	0	-1	-1	-1	-1	-1	-1	-1
162.414	94.4651	64.8069	1	-1	1	-8.75206	14.23	2.89176	2		-1	-1	0	0	-1	-1	-1	-1	-1	-1	-1
162.414	98.774	56.5205	1	-1	1	-8.95735	15.5144	2.25701	2		-1	-1	0	0	-1	-1	-1	-1	-1	-1	-1
162.414	140.206	62.1553	1	-1	1	-12.0082	32.7136	0.254116	2		-1	-1	0	0	-1	-1	-1	-1	-1	-1	-1
162.414	133.246	57.5149	1	-1	1	-11.449	27.5423	0.473113	2		-1	-1	0	0	-1	-1	-1	-1	-1	-1	-1
162.414	134.24	65.8013	1	-1	1	-11.6251	26.2377	0.164833	2		-1	-1	0	0	-1	-1	-1	-1	-1	-1	-1
196.885	64.634	66.64	1	-1	1	27.7496	40.9387	3.14123	2		-1	-1	1	0	-1	-1	-1	-1	-1	-1	-1
162.414	124.959	86.6831	1	-1	1	-11.2213	24.4249	-0.771337	2		1	-1	0	0	-1	-1	-1	-1	-1	-1	-1
169.374	131.588	85.26	1	-1	1	-4.73804	28.9869	-0.559231	2		-1	-1	0	0	-1	-1	-1	-1	-1	-1	-1
173.683	129.268	85.26	1	-1	1	-0.273741	27.3914	-0.602457	2		-1	-1	0	0	-1	-1	-1	-1	-1	-1	-1
176.003	124.628	85.26	1	-1	1	2.37398	23.9976	-0.715769	2		-1	-1	0	0	-1	-1	-1	-1	-1	-1	-1
190.919	132.251	85.26	1	-1	1	16.7015	30.9801	-0.525961	2		-1	-1	0	0	-1	-1	-1	-1	-1	-1	-1
187.604	135.566	85.26	1	-1	1	13.1574	33.5843	-0.475512	2		-1	-1	0	0	-1	-1	-1	-1	-1	-1	-1
196.554	135.234	85.26	1	-1	1	22.1066	33.9122	-0.473832	2		-1	-1	0	0	-1	-1	-1	-1	-1	-1	-1
204.84	137.223	85.26	1	-1	1	30.2279	36.2258	-0.441035	2		-1	-1	0	0	-1	-1	-1	-1	-1	-1	-1
196.554	143.521	85.26	1	-1	1	21.5107	41.2995	-0.374405	2		-1	-1	0	0	-1	-1	-1	-1	-1	-1	-1
187.936	143.521	85.26	1	-1	1	12.9158	40.6891	-0.378151	2		-1	-1	0	0	-1	-1	-1	-1	-1	-1	-1
180.644	144.184	85.26	1	-1	1	5.59558	40.7764	-0.3747	2		-1	-1	0	0	-1	-1	-1	-1	-1	-1	-1
170.369	142.195	85.26	1	-1	1	-4.50912	38.2485	-0.400597	2		-1	-1	0	0	-1	-1	-1	-1	-1	-1	-1
162.082	142.195	85.26	1	-1	1	-12.7734	37.6657	-0.404894	2		-1	-1	0	0	-1	-1	-1	-1	-1	-1	-1
235.334	50.7128	84.28	1	-1	1	66.5922	54.6037	-2.79618	2		-1	-1	0	0	-1	-1	-1	-1	-1	-1	-1
227.711	51.3758	84.28	1	-1	1	59.0116	54.4326	-2.79593	2		-1	-1	0	0	-1	-1	-1	-1	-1	-1	-1
216.441	54.3589	84.28	1	-1	1	47.6603	52.2909	-2.78485	2		-1	-1	0	0	-1	-1	-1	-1	-1	-1	-1
205.172	56.6791	84.28	1	-1	1	36.336	50.802	-2.77775	2		-1	-1	0	0	-1	-1	-1	-1	-1	-1	-1
193.902	58.9993	84.28	1	-1	1	24.957	49.3291	-2.77087	2		-1	-1	0	0	-1	-1	-1	-1	-1	-1	-1
234.671	57.6734	84.28	1	-1	1	65.494	48.0516	-2.75363	2		-1	-1	0	0	-1	-1	-1	-1	-1	-1	-1
224.728	59.6622	84.28	1	-1	1	55.5129	46.778	-2.74516	2		-1	-1	0	0	-1	-1	-1	-1	-1	-1	-1
239.643	144.515	83.3	1	-1	1	64.8725	44.4101	-0.306012	2		-1	-1	1	0	-1	-1	-1	-1	-1	-1	-1
122.639	98.1111	85.26	1	-1	1	-48.9411	20.3944	-2.20789	2		1	-1	0	0	-1	-1	-1	-1	-1	-1	-1
125.291	131.257	85.26	1	-1	1	-48.6802	25.8307	-0.618398	2		1	-1	0	0	-1	-1	-1	-1	-1	-1	-1
144.846	146.172	85.26	1	-1	1	-30.2492	40.0531	-0.370337	2		-1	-1	0	0	-1	-1	-1	-1	-1	-1	-1
173.02	151.807	85.26	1	-1	1	-2.55583	47.277	-0.311953	2		-1	-1	0	0	-1	-1	-1	-1	-1	-1	-1
179.981	152.801	85.26	1	-1	1	4.31466	48.7086	-0.302945	2		-1	-1	0	0	-1	-1	-1	-1	-1	-1	-1
191.582	153.464	85.26	1	-1	1	15.837	50.1663	-0.29554	2		-1	-1	0	0	-1	-1	-1	-1	-1	-1	-1
202.851	152.47	85.26	1	-1	1	27.148	50.0431	-0.299448	2		-1	-1	0	0	-1	-1	-1	-1	-1	-1	-1
178.324	123.965	98.98	1	-1	1	4.56247	34.6591	-1.01878	2		-1	-1	0	0	-1	-1	-1	-1	-1	-1	-1
172.689	119.324	98.98	1	-1	1	-0.723527	32.4342	-1.15351	2		-1	-1	0	0	-1	-1	-1	-1	-1	-1	-1
174.346	132.583	98.98	1	-1	1	-0.024165	39.3495	-0.832625	2		-1	-1	0	0	-1	-1	-1	-1	-1	-1	-1
168.048	133.246	98.98	1	-1	1	-6.3527	39.4225	-0.827266	2		-1	-1	0	0	-1	-1	-1	-1	-1	-1	-1
180.975	134.903	98.98	1	-1	1	6.42041	41.2559	-0.781907	2		-1	-1	0	0	-1	-1	-1	-1	-1	-1	-1
177.661	103.414	98.98	1	-1	1	5.37925	30.4591	-1.64682	2		-1	-1	0	0	-1	-1	-1	-1	-1	-1	-1
272.126	56.0162	98.98	1	-1	1	102.718	54.3159	-2.49244	2		-1	-1	0	0	-1	-1	-1	-1	-1	-1	-1
283.064	53.696	98.98	1	-1	1	113.68	55.729	-2.5114	2		-1	-1	0	0	-1	-1	-1	-1	-1	-1	-1
295.991	52.7016	98.98	1	-1	1	126.525	55.9798	-2.51702	2		-1	-1	0	0	-1	-1	-1	-1	-1	-1	-1
303.283	51.7072	98.98	1	-1	1	133.779	56.498	-2.5249	2		-1	-1	0	0	-1	-1	-1	-1	-1	-1	-1
303.946	144.184	100.94	1	-1	1	130.465	55.5028	-0.58464	2		-1	-1	0	0	-1	-1	-1	-1	-1	-1	-1
295.659	142.858	100.94	1	-1	1	122.04	54.1907	-0.604525	2		-1	-1	0	0	-1	-1	-1	-1	-1	-1	-1
286.378	144.184	100.94	1	-1	1	112.478	54.9386	-0.596219	2		-1	-1	0	0	-1	-1	-1	-1	-1	-1	-1
264.834	139.543	100.94	1	-1	1	90.7391	50.4719	-0.666634	2		-1	-1	1	0	-1	-1	-1	-1	-1	-1	-1
246.935	138.549	100.94	1	-1	1	72.5858	48.9177	-0.694241	2		-1	-1	0	0	-1	-1	-1	-1	-1	-1	-1
211.469	133.246	100.94	1	-1	1	36.9943	43.3561	-0.809516	2		-1	-1	0	0	-1	-1	-1	-1	-1	-1	-1
202.851	133.577	100.94	1	-1	1	28.3088	43.0876	-0.812974	2		-1	-1	0	0	-1	-1	-1	-1	-1	-1	-1
196.554	127.942	100.94	1	-1	1	22.4331	39.3056	-0.928653	2		-1	-1	0	0	-1	-1	-1	-1	-1	-1	-1
192.908	132.914	100.94	1	-1	1	18.4393	42.1006	-0.835722	2		-1	-1	0	0	-1	-1	-1	-1	-1	-1	-1
197.217	123.965	100.94	1	-1	1	23.3803	37.2407	-1.01579	2		-1	-1	0	0	-1	-1	-1	-1	-1	-1	-1
185.947	126.948	100.94	1	-1	1	11.9263	38.2288	-0.96458	2		-1	-1	0	0	-1	-1	-1	-1	-1	-1	-1
184.29	114.684	100.94	1	-1	1	11.1555	33.2832	-1.283	2		-1	-1	0	0	-1	-1	-1	-1	-1	-1	-1
193.239	117.667	100.94	1	-1	1	19.8664	34.4489	-1.18187	2		-1	-1	0	0	-1	-1	-1	-1	-1	-1	-1
296.985	114.021	108.78	2	-1	1	124.833	43.0099	-1.18424	2		-1	-1	1	0	-1	-1	-1	-1	-1	-1	-1
305.934	113.69	108.78	2	-1	1	133.93	42.9327	-1.18187	2		-1	-1	1	0	-1	-1	-1	-1	-1	-1	-1
334.44	112.695	108.78	2	-1	1	162.895	42.5117	-1.17663	2		-1	-1	1	0	-1	-1	-1	-1	-1	-1	-1
273.783	117.336	120.54	1	-1	1	101.173	55.0087	-1.22085	2		-1	-1	1	0	-1	-1	-1	-1	-1	-1	-1
263.176	115.015	120.54	1	-1	1	90.5171	54.2321	-1.27227	2		-1	-1	1	0	-1	-1	-1	-1	-1	-1	-1
284.058	136.56	117.6	1	-1	1	110.619	61.3756	-0.893879	2		-1	-1	0	0	-1	-1	-1	-1	-1	-1	-1
274.446	127.942	117.6	1	-1	1	101.252	56.5029	-1.02479	2		-1	-1	0	0	-1	-1	-1	-1	-1	-1	-1
260.856	128.605	117.6	1	-1	1	87.3518	56.4866	-1.02693	2		-1	-1	0	0	-1	-1	-1	-1	-1	-1	-1
267.817	136.56	117.6	1	-1	1	93.9939	60.9271	-0.906435	2		-1	-1	0	0	-1	-1	-1	-1	-1	-1	-1
251.575	139.543	117.6	1	-1	1	77.2128	62.1342	-0.880324	2		-1	-1	0	0	-1	-1	-1	-1	-1	-1	-1
244.615	138.217	117.6	1	-1	1	70.1903	61.0759	-0.903193	2		-1	-1	0	0	-1	-1	-1	-1	-1	-1	-1
229.368	123.302	117.6	1	-1	1	55.6632	53.2859	-1.14642	2		-1	-1	0	0	-1	-1	-1	-1	-1	-1	-1
217.435	122.639	117.6	1	-1	1	43.6083	52.6589	-1.17189	2		-1	-1	0	0	-1	-1	-1	-1	-1	-1	-1
202.851	122.97	117.6	1	-1	1	28.8612	52.2579	-1.18361	2		-1	-1	0	0	-1	-1	-1	-1	-1	-1	-1
191.913	123.965	117.6	1	-1	1	17.8809	52.1976	-1.17902	2		-1	-1	0	0	-1	-1	-1	-1	-1	-1	-1
179.649	121.313	117.6	1	-1	1	5.84041	50.9484	-1.24297	2		-1	-1	0	0	-1	-1	-1	-1	-1	-1	-1
224.728	85.5158	89.18	3	-1	1	53.752	27.7363	-2.23811	2		-1	-1	1	0	-1	-1	-1	-1	-1	-1	-1
201.857	90.1562	89.18	3	-1	1	30.5882	25.6642	-2.15482	2		-1	-1	1	0	-1	-1	-1	-1	-1	-1	-1
228.374	119.324	90.502	3	-1	1	55.1224	27.3884	-0.911617	2		-1	-1	1	0	-1	-1	-1	-1	-1	-1	-1
167.717	125.953	57.5149	1	-1	1	-5.63542	21.4252	0.603927	2		-1	-1	0	0	-1	-1	-1	-1	-1	-1	-1
167.717	123.633	48.897	1	-1	1	-5.35977	25.5012	0.944483	2		-1	-1	0	0	-1	-1	-1	-1	-1	-1	-1
167.717	117.667	44.9195	1	-1	1	-4.88049	25.9142	1.22232	2		-1	-1	0	0	-1	-1	-1	-1	-1	-1	-1
167.717	115.347	53.5374	1	-1	1	-4.82241	17.1035	1.15504	2		-1	-1	0	0	-1	-1	-1	-1	-1	-1	-1
167.717	110.375	46.9083	1	-1	1	-4.38117	22.1102	1.49422	2		-1	-1	0	0	-1	-1	-1	-1	-1	-1	-1
167.717	110.375	34.3129	1	-1	1	-4.22218	34.6477	1.53726	2		-1	-1	0	0	-1	-1	-1	-1	-1	-1	-1
167.717	111.369	27.6838	1	-1	1	-4.21001	41.3361	1.52554	2		-1	-1	0	0	-1	-1	-1	-1	-1	-1	-1
167.717	136.229	35.6388	1	-1	1	-6.09823	43.733	0.908115	2		-1	-1	0	0	-1	-1	-1	-1	-1	-1	-1
167.717	59.6622	65.1384	1	-1	1	-0.964171	48.0962	3.10889	2		-1	-1	0	0	-1	-1	-1	-1	-1	-1	-1
167.717	115.015	86.6831	1	-1	1	-5.21699	19.2343	-1.14278	2		1	-1	0	0	-1	-1	-1	-1	-1	-1	-1
167.717	117.999	76.7394	1	-1	1	-5.306	12.9058	-0.613787	2		-1	-1	0	0	-1	-1	-1	-1	-1	-1	-1
167.717	106.066	89.9976	1	-1	1	-4.61522	21.2022	-1.60737	2		-1	-1	0	0	-1	-1	-1	-1	-1	-1	-1
167.717	110.375	97.2897	1	-1	1	-5.01715	28.5448	-1.43684	2		-1	-1	0	0	-1	-1	-1	-1	-1	-1	-1
168.048	105.072	77.7337	1	-1	1	-4.05832	9.26238	-1.81666	2		2	-1	0	0	-1	-1	-1	-1	-1	-1	-1
167.717	91.8135	50.5543	1	-1	1	-3.0923	24.2274	2.32738	2		-1	-1	0	0	-1	-1	-1	-1	-1	-1	-1
167.717	87.5045	54.5318	1	-1	1	-2.83262	24.7429	2.56684	2		-1	-1	0	0	-1	-1	-1	-1	-1	-1	-1
167.717	143.521	103.587	1	-1	1	-7.4804	49.7689	-0.7297	2		-1	-1	0	0	-1	-1	-1	-1	-1	-1	-1
167.717	138.549	106.57	1	-1	1	-7.16049	48.6189	-0.84531	2		-1	-1	0	0	-1	-1	-1	-1	-1	-1	-1
167.717	97.1168	58.5093	1	-1	1	-3.57412	14.8074	2.40998	2		-1	-1	0	0	-1	-1	-1	-1	-1	-1	-1
167.717	96.7853	64.144	1	-1	1	-3.62141	11.8988	2.77755	2		-1	-1	0	0	-1	-1	-1	-1	-1	-1	-1
167.717	68.6115	58.8407	1	-1	1	-1.52828	40.2859	2.93439	2		-1	-1	0	0	-1	-1	-1	-1	-1	-1	-1
160.425	111.701	60.8295	1	-1	1	-11.9248	8.81854	1.21554	2		-1	-1	0	0	-1	-1	-1	-1	-1	-1	-1
160.425	106.398	56.1891	1	-1	1	-11.4849	12.8974	1.75762	2		-1	-1	0	0	-1	-1	-1	-1	-1	-1	-1
160.425	103.083	61.1609	1	-1	1	-11.3092	9.34804	2.19826	2		-1	-1	0	0	-1	-1	-1	-1	-1	-1	-1
160.425	90.1562	58.8407	1	-1	1	-10.3503	20.6943	2.67427	2		-1	-1	0	0	-1	-1	-1	-1	-1	-1	-1
160.425	86.5101	66.7957	1	-1	1	-10.1885	21.8063	3.08718	2		-1	-1	0	0	-1	-1	-1	-1	-1	-1	-1
124.959	92.1449	71.54	1	-1	1	-46.0248	18.756	-2.98203	2		1	-1	0	0	-1	-1	-1	-1	-1	-1	-1
127.279	81.2068	71.54	1	-1	1	-42.9242	29.4566	-3.02272	2		-1	-1	0	0	-1	-1	-1	-1	-1	-1	-1
160.425	130.262	111.542	1	-1	1	-13.8999	47.886	-1.05368	2		-1	-1	0	0	-1	-1	-1	-1	-1	-1	-1
160.425	125.622	101.599	1	-1	1	-13.4406	36.9339	-1.0418	2		-1	-1	0	0	-1	-1	-1	-1	-1	-1	-1
160.425	117.336	86.3516	1	-1	1	-12.6522	19.5999	-1.04994	2		1	-1	0	0	-1	-1	-1	-1	-1	-1	-1
160.425	110.044	96.9582	1	-1	1	-12.2617	28.0567	-1.46573	2		-1	-1	0	0	-1	-1	-1	-1	-1	-1	-1
160.425	96.7853	92.9807	1	-1	1	-11.258	26.6248	-1.97178	2		-1	-1	0	0	-1	-1	-1	-1	-1	-1	-1
160.425	112.032	42.2679	1	-1	1	-11.7144	26.9498	1.47358	2		-1	-1	0	0	-1	-1	-1	-1	-1	-1	-1
160.425	110.706	52.2116	1	-1	1	-11.7445	16.9186	1.4691	2		-1	-1	0	0	-1	-1	-1	-1	-1	-1	-1
160.425	117.336	54.5318	1	-1	1	-12.2506	17.0292	1.05496	2		-1	-1	0	0	-1	-1	-1	-1	-1	-1	-1
160.425	124.296	58.8407	1	-1	1	-12.8055	18.9243	0.609597	2		-1	-1	0	0	-1	-1	-1	-1	-1	-1	-1
160.425	122.639	50.5543	1	-1	1	-12.5818	23.3328	0.953644	2		-1	-1	0	0	-1	-1	-1	-1	-1	-1	-1
160.425	120.65	42.2679	1	-1	1	-12.3341	29.4133	1.18112	2		-1	-1	0	0	-1	-1	-1	-1	-1	-1	-1
160.425	77.5608	40.9421	1	-1	1	-9.21853	41.4849	2.44294	2		-1	-1	0	0	-1	-1	-1	-1	-1	-1	-1
182.964	147.498	40.18	1	-1	1	8.24027	49.7405	0.655623	2		-1	-1	0	0	-1	-1	-1	-1	-1	-1	-1
193.571	146.835	40.18	1	-1	1	18.8662	49.7472	0.652245	2		-1	-1	0	0	-1	-1	-1	-1	-1	-1	-1
170.369	147.83	40.18	1	-1	1	-4.34529	49.3625	0.664935	2		-1	-1	0	0	-1	-1	-1	-1	-1	-1	-1
158.436	137.554	40.18	1	-1	1	-15.5069	40.9353	0.82585	2		-1	-1	0	0	-1	-1	-1	-1	-1	-1	-1
146.172	135.234	40.18	1	-1	1	-27.5712	38.8446	0.886474	2		-1	-1	0	0	-1	-1	-1	-1	-1	-1	-1
130.925	122.97	40.18	1	-1	1	-41.8955	31.7395	1.20808	2		-1	-1	0	0	-1	-1	-1	-1	-1	-1	-1
127.279	114.352	40.18	1	-1	1	-44.912	29.4258	1.48775	2		-1	-1	0	0	-1	-1	-1	-1	-1	-1	-1
126.948	105.403	40.18	1	-1	1	-44.599	29.6612	1.79085	2		-1	-1	0	0	-1	-1	-1	-1	-1	-1	-1
131.92	97.7797	40.18	1	-1	1	-39.0922	31.6945	2.01785	2		-1	-1	0	0	-1	-1	-1	-1	-1	-1	-1
138.217	90.1562	40.18	1	-1	1	-32.263	35.0655	2.20732	2		-1	-1	0	0	-1	-1	-1	-1	-1	-1	-1
150.15	85.1843	40.18	1	-1	1	-20.0049	37.3992	2.30066	2		-1	-1	0	0	-1	-1	-1	-1	-1	-1	-1
245.941	146.835	42.14	1	-1	1	71.2381	51.4677	0.573259	2		-1	-1	0	0	-1	-1	-1	-1	-1	-1	-1
236.66	146.172	42.14	1	-1	1	61.973	50.4086	0.58655	2		-1	-1	0	0	-1	-1	-1	-1	-1	-1	-1
225.722	143.189	42.14	1	-1	1	51.2178	47.3141	0.628283	2		-1	-1	0	0	-1	-1	-1	-1	-1	-1	-1
241.3	137.223	41.9364	1	-1	1	67.2	43.3495	0.692888	2		-1	-1	0	0	-1	-1	-1	-1	-1	-1	-1
241.3	142.195	45.9139	1	-1	1	66.8644	45.3265	0.556459	2		-1	-1	0	0	-1	-1	-1	-1	-1	-1	-1
241.3	129.268	32.9871	1	-1	1	67.7442	44.0649	0.966612	2		-1	-1	0	0	-1	-1	-1	-1	-1	-1	-1
241.3	124.296	30.9984	1	-1	1	68.0677	42.9612	1.08663	2		-1	-1	0	0	-1	-1	-1	-1	-1	-1	-1
241.3	143.521	32.9871	1	-1	1	66.8352	53.8669	0.754948	2		-1	-1	0	0	-1	-1	-1	-1	-1	-1	-1
241.3	153.133	53.5374	1	-1	1	66.1258	52.5011	0.325851	2		-1	-1	0	0	-1	-1	-1	-1	-1	-1	-1
241.3	104.077	15.7514	1	-1	1	69.3972	52.3637	1.58541	2		-1	-1	0	0	-1	-1	-1	-1	-1	-1	-1
242.958	96.1224	24.3692	1	-1	1	71.4959	44.1765	1.75763	2		-1	-1	0	0	-1	-1	-1	-1	-1	-1	-1
227.379	79.5496	35.9702	1	-1	1	57.1519	40.0882	2.25119	2		-1	-1	1	0	-1	-1	-1	-1	-1	-1	-1
227.379	106.066	27.6838	1	-1	1	55.4643	40.567	1.55037	2		-1	-1	1	0	-1	-1	-1	-1	-1	-1	-1
246.272	84.8529	35.28	2	-1	1	75.4248	37.1231	2.10058	2		-1	-1	1	0	-1	-1	-1	-1	-1	-1	-1
230.694	109.049	35.28	2	-1	1	58.4983	33.3697	1.44053	2		-1	-1	1	0	-1	-1	-1	-1	-1	-1	-1
236.991	109.381	35.28	2	-1	1	64.7202	33.4712	1.41868	2		-1	-1	1	0	-1	-1	-1	-1	-1	-1	-1
247.929	108.055	35.28	2	-1	1	75.6483	33.3163	1.43724	2		-1	-1	1	0	-1	-1	-1	-1	-1	-1	-1
248.592	116.341	35.28	2	-1	1	75.7994	35.7289	1.20681	2		-1	-1	1	0	-1	-1	-1	-1	-1	-1	-1
208.486	104.74	35.28	2	-1	1	36.7948	33.0653	1.61491	2		-1	-1	1	0	-1	-1	-1	-1	-1	-1	-1
305.934	131.92	35.28	2	-1	1	132.209	46.5605	0.834978	2		-1	-1	1	0	-1	-1	-1	-1	-1	-1	-1
223.07	126.948	35.28	1	-1	1	49.7319	40.2311	1.0034	2		-1	-1	1	0	-1	-1	-1	-1	-1	-1	-1
210.806	126.616	35.28	1	-1	1	37.5551	39.6649	1.02942	2		-1	-1	1	0	-1	-1	-1	-1	-1	-1	-1
197.548	109.712	35.28	1	-1	1	25.5648	33.4583	1.49013	1.93371		-1	-1	0	0	2	-1	-1	-1	-1	-1	-1
195.228	100.1	35.28	1	-1	1	23.942	33.7012	1.78068	2		-1	-1	0	0	-1	-1	-1	-1	-1	-1	-1
197.548	105.072	29.0096	1	-1	1	25.9776	39.4739	1.62596	2		-1	-1	0	0	-1	-1	-1	-1	-1	-1	-1
205.172	111.369	22.54	1	-1	1	33.1986	46.2819	1.47657	2		-1	-1	0	0	-1	-1	-1	-1	-1	-1	-1
196.222	113.69	22.54	1	-1	1	24.1172	46.6521	1.44152	2		-1	-1	0	0	-1	-1	-1	-1	-1	-1	-1
189.262	116.341	22.54	1	-1	1	16.9845	47.1543	1.3972	2		-1	-1	0	0	-1	-1	-1	-1	-1	-1	-1
208.486	121.313	22.54	1	-1	1	35.7734	48.6874	1.26915	2		-1	-1	0	0	-1	-1	-1	-1	-1	-1	-1
223.07	121.645	22.54	1	-1	1	50.1978	49.0225	1.24257	2		-1	-1	0	0	-1	-1	-1	-1	-1	-1	-1
233.014	121.313	22.54	1	-1	1	60.0746	49.0783	1.23583	2		-1	-1	0	0	-1	-1	-1	-1	-1	-1	-1
215.778	112.032	22.54	1	-1	1	43.636	46.3794	1.44638	2		-1	-1	0	0	-1	-1	-1	-1	-1	-1	-1
195.891	94.1336	22.54	1	-1	1	25.1931	47.3791	1.85845	2		-1	-1	0	0	-1	-1	-1	-1	-1	-1	-1
189.593	94.7966	22.54	1	-1	1	18.8645	47.4063	1.85379	2		-1	-1	0	0	-1	-1	-1	-1	-1	-1	-1
183.295	97.4482	22.54	1	-1	1	12.393	47.0105	1.80818	2		-1	-1	0	0	-1	-1	-1	-1	-1	-1	-1
188.267	107.723	22.54	1	-1	1	16.6126	46.082	1.58131	2		-1	-1	0	0	-1	-1	-1	-1	-1	-1	-1
178.324	118.993	22.54	1	-1	1	5.88496	47.7236	1.35993	2		-1	-1	0	0	-1	-1	-1	-1	-1	-1	-1
167.386	119.987	22.54	1	-1	1	-5.09542	47.9096	1.35653	2		-1	-1	0	0	-1	-1	-1	-1	-1	-1	-1
219.424	77.2294	22.54	1	-1	1	49.5898	52.931	2.14213	2		-1	-1	0	0	-1	-1	-1	-1	-1	-1	-1
235.003	71.5946	22.54	1	-1	1	65.2223	55.3054	2.21508	2		-1	-1	0	0	-1	-1	-1	-1	-1	-1	-1
253.233	68.6115	22.54	1	-1	1	83.2365	56.3372	2.24292	2		-1	-1	0	0	-1	-1	-1	-1	-1	-1	-1
270.137	66.9542	22.54	1	-1	1	99.8432	56.7746	2.25275	2		-1	-1	0	0	-1	-1	-1	-1	-1	-1	-1
238.649	127.611	23.3749	1	-1	1	65.2544	51.1505	1.10885	2		-1	-1	0	0	-1	-1	-1	-1	-1	-1	-1
238.649	136.229	28.6782	1	-1	1	64.676	51.6789	0.912723	2		-1	-1	0	0	-1	-1	-1	-1	-1	-1	-1
238.649	112.032	17.0772	1	-1	1	66.2752	51.8618	1.43473	2		-1	-1	0	0	-1	-1	-1	-1	-1	-1	-1
238.649	154.79	66.7957	1	-1	1	63.277	51.9388	0.0696184	2		-1	-1	0	0	-1	-1	-1	-1	-1	-1	-1
272.457	84.5214	23.0434	1	-1	1	101.185	47.8892	1.95893	2		-1	-1	1	0	-1	-1	-1	-1	-1	-1	-1
283.395	76.8979	22.54	1	-1	1	112.298	51.2157	2.085	2		-1	-1	1	0	-1	-1	-1	-1	-1	-1	-1
270.469	95.128	21.7176	1	-1	1	98.6565	46.7298	1.73679	2		-1	-1	1	0	-1	-1	-1	-1	-1	-1	-1
264.502	110.375	24.3692	1	-1	1	91.9317	44.6564	1.40787	2		-1	-1	0	0	-1	-1	-1	-1	-1	-1	-1
264.502	117.336	23.7063	1	-1	1	91.5375	47.2035	1.26651	2		-1	-1	0	0	-1	-1	-1	-1	-1	-1	-1
264.502	123.965	27.3523	1	-1	1	91.1686	46.6364	1.10605	2		-1	-1	0	0	-1	-1	-1	-1	-1	-1	-1
274.777	115.678	22.54	1	-1	1	101.816	47.9822	1.29636	2		-1	-1	0	0	-1	-1	-1	-1	-1	-1	-1
275.772	110.706	22.54	1	-1	1	103.065	46.6835	1.3963	2		-1	-1	0	0	-1	-1	-1	-1	-1	-1	-1
292.013	124.296	22.54	1	-1	1	118.507	51.842	1.1228	2		-1	-1	0	0	2	-1	-1	-1	-1	-1	-1
284.39	127.279	22.54	1	-1	1	110.767	53.0694	1.07904	2		-1	-1	0	0	-1	-1	-1	-1	-1	-1	-1
269.474	133.577	22.54	1	-1	1	95.5678	56.0145	0.993998	2		-1	-1	0	0	-1	-1	-1	-1	-1	-1	-1
257.21	130.925	22.54	1	-1	1	83.5052	54.1168	1.0441	2		-1	-1	0	0	-1	-1	-1	-1	-1	-1	-1
257.21	123.965	22.54	1	-1	1	83.9159	50.6985	1.15943	2		-1	-1	0	0	-1	-1	-1	-1	-1	-1	-1
413.658	58.3363	22.54	1	-1	1	240.221	61.9439	2.28908	2		-1	-1	0	0	-1	-1	-1	-1	-1	-1	-1
247.929	105.403	22.54	1	-1	1	75.8362	45.649	1.54337	2		-1	-1	0	0	-1	-1	-1	-1	-1	-1	-1
246.935	100.763	22.54	1	-1	1	75.1374	45.5607	1.64602	2		-1	-1	0	0	-1	-1	-1	-1	-1	-1	-1
258.205	99.7684	22.54	1	-1	1	86.3117	45.5628	1.65314	2		-1	-1	0	0	-1	-1	-1	-1	-1	-1	-1
260.525	105.072	22.54	1	-1	1	88.2967	45.6748	1.53439	2		-1	-1	0	0	-1	-1	-1	-1	-1	-1	-1
254.227	94.4651	22.54	1	-1	1	82.701	46.1113	1.77291	2		-1	-1	0	0	-1	-1	-1	-1	-1	-1	-1
246.935	91.8135	22.54	1	-1	1	75.6815	46.7094	1.83793	2		-1	-1	0	0	2	-1	-1	-1	-1	-1	-1
249.255	87.836	22.54	1	-1	1	78.203	47.704	1.91618	2		-1	-1	0	0	2	-1	-1	-1	-1	-1	-1
251.575	82.8641	22.54	1	-1	1	80.7776	49.3552	2.00953	2		-1	-1	0	0	-1	-1	-1	-1	-1	-1	-1
264.502	79.881	22.54	1	-1	1	93.6292	50.2664	2.05052	2		-1	-1	0	0	-1	-1	-1	-1	-1	-1	-1
294.996	70.9317	22.54	1	-1	1	123.929	53.9719	2.17355	2		-1	-1	0	0	-1	-1	-1	-1	-1	-1	-1
304.94	67.9486	22.54	1	-1	1	133.77	55.4587	2.21143	2		-1	-1	0	0	-1	-1	-1	-1	-1	-1	-1
316.21	66.9542	22.54	1	-1	1	144.809	55.8958	2.21801	2		-1	-1	0	0	-1	-1	-1	-1	-1	-1	-1
331.788	62.9767	22.54	1	-1	1	160.138	58.1294	2.2642	2		-1	-1	0	0	-1	-1	-1	-1	-1	-1	-1
332.782	58.6678	22.54	1	-1	1	161.239	60.8287	2.31996	2		-1	-1	0	0	-1	-1	-1	-1	-1	-1	-1
316.872	60.6565	22.54	1	-1	1	145.687	59.6897	2.30439	2		-1	-1	0	0	-1	-1	-1	-1	-1	-1	-1
301.957	62.9767	22.54	1	-1	1	131.069	58.45	2.28381	2		-1	-1	0	0	-1	-1	-1	-1	-1	-1	-1
230.694	89.4933	22.54	1	-1	1	59.8503	47.6302	1.90577	2		-1	-1	0	0	-1	-1	-1	-1	-1	-1	-1
228.374	106.398	24.5	1	-1	1	56.4472	43.7631	1.54594	2		-1	-1	0	0	-1	-1	-1	-1	-1	-1	-1
230.362	102.752	24.5	1	-1	1	58.6502	43.6517	1.62595	2		-1	-1	0	0	-1	-1	-1	-1	-1	-1	-1
255.222	124.959	27.44	1	-1	1	81.8792	46.7761	1.09663	2		-1	-1	1	0	-1	-1	-1	-1	-1	-1	-1
251.244	116.673	26.46	1	-1	1	78.4269	44.1214	1.27575	2		-1	-1	0	0	-1	-1	-1	-1	-1	-1	-1
239.312	118.33	26.46	1	-1	1	66.4903	44.4647	1.25664	2		-1	-1	0	0	-1	-1	-1	-1	-1	-1	-1
228.374	115.347	26.46	1	-1	1	55.843	43.3684	1.33657	2		-1	-1	0	0	-1	-1	-1	-1	-1	-1	-1
220.75	111.038	26.46	1	-1	1	48.5847	42.3598	1.44598	2		-1	-1	0	0	-1	-1	-1	-1	-1	-1	-1
204.509	112.695	30.004	1	-1	1	32.3563	39.1378	1.41849	2		-1	-1	0	0	-1	-1	-1	-1	-1	-1	-1
221.081	117.336	26.46	1	-1	1	48.4856	43.8566	1.30422	2		-1	-1	0	0	-1	-1	-1	-1	-1	-1	-1
203.514	117.336	26.46	1	-1	1	31.0781	43.6779	1.33215	2		-1	-1	0	0	-1	-1	-1	-1	-1	-1	-1
306.929	144.846	30.38	1	-1	1	132.589	59.4418	0.737944	2		-1	-1	0	0	-1	-1	-1	-1	-1	-1	-1
316.872	145.178	30.38	1	-1	1	142.596	60.0973	0.731791	2		-1	-1	0	0	-1	-1	-1	-1	-1	-1	-1
329.799	144.846	30.38	1	-1	1	155.655	60.3393	0.733019	2		-1	-1	0	0	-1	-1	-1	-1	-1	-1	-1
340.737	145.841	30.38	1	-1	1	166.682	61.5081	0.7218	2		-1	-1	0	0	-1	-1	-1	-1	-1	-1	-1
332.119	140.869	30.38	1	-1	1	158.13	57.4131	0.776804	2		-1	-1	0	0	-1	-1	-1	-1	-1	-1	-1
317.204	139.875	30.38	1	-1	1	143.138	56.1173	0.79173	2		-1	-1	0	0	-1	-1	-1	-1	-1	-1	-1
303.283	140.538	30.38	1	-1	1	129.11	56.0536	0.788316	2		-1	-1	0	0	-1	-1	-1	-1	-1	-1	-1
248.924	143.852	30.38	1	-1	1	74.446	56.1825	0.780357	2		-1	-1	0	0	-1	-1	-1	-1	-1	-1	-1
240.969	142.858	30.38	1	-1	1	66.5578	55.1029	0.798894	2		-1	-1	0	0	-1	-1	-1	-1	-1	-1	-1
296.985	123.302	30.38	2	-1	1	123.584	44.7189	1.05541	2		-1	-1	1	0	-1	-1	-1	-1	-1	-1	-1
302.951	125.953	30.38	2	-1	1	129.423	46.3869	1.00285	2		-1	-1	1	0	-1	-1	-1	-1	-1	-1	-1
319.193	125.291	30.38	2	-1	1	145.693	46.5705	1.00555	2		-1	-1	1	0	-1	-1	-1	-1	-1	-1	-1
332.119	71.2632	30.38	2	-1	1	160.352	46.9085	2.22459	2		-1	-1	1	0	-1	-1	-1	-1	-1	-1	-1
296.322	58.0049	30.38	1	-1	1	125.881	56.2202	2.4444	2		-1	-1	0	0	-1	-1	-1	-1	-1	-1	-1
308.255	54.6903	30.38	1	-1	1	137.641	58.4121	2.47502	2		-1	-1	0	0	-1	-1	-1	-1	-1	-1	-1
317.867	53.696	30.38	1	-1	1	147.03	58.9756	2.48016	2		-1	-1	0	0	-1	-1	-1	-1	-1	-1	-1
331.457	50.3814	30.38	1	-1	1	160.35	61.3214	2.50743	2		-1	-1	0	0	-1	-1	-1	-1	-1	-1	-1
284.39	58.6678	30.38	1	-1	1	114.217	56.0743	2.44452	2		-1	-1	0	0	-1	-1	-1	-1	-1	-1	-1
274.777	63.3082	30.38	1	-1	1	104.603	53.0425	2.39256	2		-1	-1	0	0	-1	-1	-1	-1	-1	-1	-1
258.868	65.6284	30.38	1	-1	1	88.9222	52.0046	2.37334	2		-1	-1	0	0	-1	-1	-1	-1	-1	-1	-1
248.261	67.2857	30.38	1	-1	1	78.4444	51.3035	2.35866	2		-1	-1	0	0	-1	-1	-1	-1	-1	-1	-1
235.003	68.943	30.38	1	-1	1	65.3535	50.7777	2.34596	2		-1	-1	0	0	-1	-1	-1	-1	-1	-1	-1
273.783	70.6002	30.38	1	-1	1	103.251	48.2326	2.28577	2		-1	-1	0	0	-1	-1	-1	-1	-1	-1	-1
264.502	71.9261	30.38	1	-1	1	94.0879	47.7005	2.27268	2		-1	-1	0	0	-1	-1	-1	-1	-1	-1	-1
253.233	74.5777	30.38	1	-1	1	82.8869	46.494	2.23872	2		-1	-1	0	0	-1	-1	-1	-1	-1	-1	-1
243.621	77.2294	30.38	1	-1	1	73.2933	45.3293	2.20147	2		-1	-1	0	0	-1	-1	-1	-1	-1	-1	-1
233.014	77.8923	30.38	1	-1	1	62.8334	45.3717	2.20098	2		-1	-1	0	0	-1	-1	-1	-1	-1	-1	-1
220.75	76.8979	30.38	1	-1	1	50.849	46.4655	2.23214	2		-1	-1	0	0	-1	-1	-1	-1	-1	-1	-1
209.149	76.5665	30.38	1	-1	1	39.4712	47.221	2.25012	2		-1	-1	0	0	-1	-1	-1	-1	-1	-1	-1
201.526	77.8923	30.38	1	-1	1	31.8819	46.8343	2.23546	2		-1	-1	0	0	-1	-1	-1	-1	-1	-1	-1
193.571	75.5721	30.38	1	-1	1	24.115	48.6526	2.28252	2		-1	-1	0	0	-1	-1	-1	-1	-1	-1	-1
184.953	77.5608	30.38	1	-1	1	15.3771	47.9053	2.25875	2		-1	-1	0	0	-1	-1	-1	-1	-1	-1	-1
177.661	80.5439	30.38	1	-1	1	7.88999	46.5476	2.21545	2		-1	-1	0	0	-1	-1	-1	-1	-1	-1	-1
274.446	131.92	30.3355	1	-1	1	100.648	49.0051	0.924564	2		-1	-1	0	0	-1	-1	-1	-1	-1	-1	-1
274.446	124.959	26.0265	1	-1	1	101.005	48.5789	1.09196	2		-1	-1	0	0	-1	-1	-1	-1	-1	-1	-1
274.446	100.431	16.4143	1	-1	1	102.269	51.6969	1.61841	2		-1	-1	0	0	-1	-1	-1	-1	-1	-1	-1
274.446	85.8472	13.0997	1	-1	1	103.02	56.9654	1.87622	2		-1	-1	0	0	-1	-1	-1	-1	-1	-1	-1
291.35	132.251	30.38	1	-1	1	117.531	49.8259	0.906862	2		-1	-1	0	0	-1	-1	-1	-1	-1	-1	-1
258.868	129.268	30.38	1	-1	1	85.2543	46.7717	0.981542	2		-1	-1	0	0	-1	-1	-1	-1	-1	-1	-1
243.621	129.931	30.38	1	-1	1	70.0232	46.6332	0.986431	2		-1	-1	0	0	-1	-1	-1	-1	-1	-1	-1
226.053	134.24	30.38	1	-1	1	52.2482	48.6335	0.935272	2		-1	-1	0	0	-1	-1	-1	-1	-1	-1	-1
223.402	126.948	30.38	1	-1	1	50.1028	44.3411	1.06629	2		-1	-1	0	0	-1	-1	-1	-1	-1	-1	-1
224.396	119.987	30.38	1	-1	1	51.5604	41.1632	1.20876	2		-1	-1	0	0	-1	-1	-1	-1	-1	-1	-1
230.362	122.307	30.38	1	-1	1	57.3292	42.2704	1.14955	2		-1	-1	0	0	-1	-1	-1	-1	-1	-1	-1
204.177	93.4707	30.9984	1	-1	1	33.3832	39.1499	1.91334	2		-1	-1	0	0	-1	-1	-1	-1	-1	-1	-1
204.177	78.8866	39.2848	1	-1	1	34.3148	39.1214	2.34466	2		-1	-1	0	0	-1	-1	-1	-1	-1	-1	-1
204.177	99.1055	29.3411	1	-1	1	33.0038	39.5073	1.76473	2		-1	-1	0	0	-1	-1	-1	-1	-1	-1	-1
212.795	91.8135	30.38	1	-1	1	42.0058	39.9646	1.93456	2		-1	-1	0	0	-1	-1	-1	-1	-1	-1	-1
211.138	99.1055	30.38	1	-1	1	39.8651	38.3272	1.75657	2		-1	-1	0	0	-1	-1	-1	-1	-1	-1	-1
217.767	98.4426	30.38	1	-1	1	46.4571	38.2903	1.76212	2		-1	-1	0	0	-1	-1	-1	-1	-1	-1	-1
222.076	93.1393	30.38	1	-1	1	51.0677	39.306	1.88816	2		-1	-1	0	0	-1	-1	-1	-1	-1	-1	-1
224.728	88.4989	30.38	1	-1	1	53.9906	40.7212	1.99361	2		-1	-1	0	0	-1	-1	-1	-1	-1	-1	-1
223.402	83.8585	30.38	1	-1	1	52.9929	42.7082	2.0962	2		-1	-1	0	0	-1	-1	-1	-1	-1	-1	-1
201.857	117.667	30.38	1	-1	1	29.3519	40.0126	1.3001	2		-1	-1	0	0	-1	-1	-1	-1	-1	-1	-1
188.93	119.324	30.9984	1	-1	1	16.3326	39.8127	1.27937	2		-1	-1	0	0	-1	-1	-1	-1	-1	-1	-1
188.93	114.021	30.3355	1	-1	1	16.7224	39.0461	1.41276	2		-1	-1	0	0	-1	-1	-1	-1	-1	-1	-1
188.93	86.5101	36.3017	1	-1	1	18.6256	37.7831	2.15901	2		-1	-1	0	0	-1	-1	-1	-1	-1	-1	-1
188.93	69.6059	37.959	1	-1	1	19.8204	47.6376	2.48581	2		-1	-1	0	0	-1	-1	-1	-1	-1	-1	-1
187.604	128.274	27.44	1	-1	1	14.4117	46.6509	1.12576	2		-1	-1	0	0	-1	-1	-1	-1	-1	-1	-1
174.346	127.942	27.44	1	-1	1	1.21264	46.2108	1.1519	2		-1	-1	0	0	-1	-1	-1	-1	-1	-1	-1
195.559	126.285	27.44	1	-1	1	22.4884	45.9137	1.15177	2		-1	-1	0	0	-1	-1	-1	-1	-1	-1	-1
203.846	128.605	27.44	1	-1	1	30.5858	47.1958	1.09579	2		-1	-1	0	0	-1	-1	-1	-1	-1	-1	-1
215.447	127.611	27.44	1	-1	1	42.1813	46.9952	1.09755	2		-1	-1	0	0	-1	-1	-1	-1	-1	-1	-1
227.048	126.616	27.44	1	-1	1	53.7713	46.8076	1.1002	2		-1	-1	0	0	-1	-1	-1	-1	-1	-1	-1
242.295	123.965	27.44	1	-1	1	69.0907	45.9404	1.13059	2		-1	-1	0	0	-1	-1	-1	-1	-1	-1	-1
290.687	131.257	27.44	1	-1	1	116.891	51.4573	0.959099	2		-1	-1	0	0	-1	-1	-1	-1	-1	-1	-1
273.783	132.251	27.44	1	-1	1	99.9563	51.4477	0.955946	2		-1	-1	0	0	-1	-1	-1	-1	-1	-1	-1
186.61	86.8416	25.48	1	-1	1	16.4244	47.3199	2.0365	2		-1	-1	0	0	-1	-1	-1	-1	-1	-1	-1
177.661	88.4989	25.48	1	-1	1	7.37975	47.0183	2.01595	2		-1	-1	0	0	-1	-1	-1	-1	-1	-1	-1
182.964	95.128	43.4352	1	-1	1	11.9655	27.7124	2.03935	2		-1	-1	0	0	-1	-1	-1	-1	-1	-1	-1
174.678	96.7853	25.48	1	-1	1	3.80867	44.5187	1.84871	2		-1	-1	0	0	-1	-1	-1	-1	-1	-1	-1
152.47	113.358	29.0096	1	-1	1	-19.5761	40.2982	1.50123	2		-1	-1	0	0	-1	-1	-1	-1	-1	-1	-1
152.47	121.645	30.004	1	-1	1	-20.1846	41.0933	1.29802	2		-1	-1	0	0	-1	-1	-1	-1	-1	-1	-1
218.43	135.897	34.3	1	-1	1	44.506	46.4679	0.864271	2		-1	-1	0	0	-1	-1	-1	-1	-1	-1	-1
210.143	135.566	34.3	1	-1	1	36.2734	45.9155	0.88005	2		-1	-1	0	0	-1	-1	-1	-1	-1	-1	-1
201.194	136.56	34.3	1	-1	1	27.2826	46.2334	0.876053	2		-1	-1	0	0	-1	-1	-1	-1	-1	-1	-1
193.239	136.229	34.3	1	-1	1	19.3727	45.7048	0.892083	2		-1	-1	0	0	-1	-1	-1	-1	-1	-1	-1
181.97	137.223	34.3	1	-1	1	8.06174	45.9318	0.891184	2		-1	-1	0	0	-1	-1	-1	-1	-1	-1	-1
173.683	130.925	40.6106	1	-1	1	0.170698	36.7374	0.91933	2		-1	-1	0	0	-1	-1	-1	-1	-1	-1	-1
173.683	125.622	36.3017	1	-1	1	0.60649	37.2782	1.10273	2		-1	-1	0	0	-1	-1	-1	-1	-1	-1	-1
192.908	133.246	43.9252	1	-1	1	19.1352	36.7377	0.779924	2		-1	-1	0	0	-1	-1	-1	-1	-1	-1	-1
192.908	138.88	53.5374	1	-1	1	18.6086	36.1444	0.473928	2		-1	-1	0	0	-1	-1	-1	-1	-1	-1	-1
192.908	143.852	59.1722	1	-1	1	18.1799	38.9798	0.288392	2		-1	-1	0	0	-1	-1	-1	-1	-1	-1	-1
192.908	128.605	38.2904	1	-1	1	19.54	37.7888	0.973346	2		-1	-1	0	0	-1	-1	-1	-1	-1	-1	-1
192.908	122.639	33.65	1	-1	1	20.0277	38.6813	1.16892	2		-1	-1	0	0	-1	-1	-1	-1	-1	-1	-1
192.908	121.313	39.9477	1	-1	1	20.0435	32.4636	1.12222	2		-1	-1	0	0	-1	-1	-1	-1	-1	-1	-1
192.908	126.285	43.9252	1	-1	1	19.6357	31.9247	0.925837	2		-1	-1	0	0	-1	-1	-1	-1	-1	-1	-1
192.908	115.015	38.2904	1	-1	1	20.5173	31.587	1.32279	2		-1	-1	0	0	-1	-1	-1	-1	-1	-1	-1
192.908	79.2181	41.9364	1	-1	1	23.0458	37.6307	2.39883	2		-1	-1	0	0	-1	-1	-1	-1	-1	-1	-1
192.908	75.2406	46.2454	1	-1	1	23.2774	37.8487	2.55452	2		-1	-1	0	0	-1	-1	-1	-1	-1	-1	-1
192.908	69.9373	55.8576	1	-1	1	23.5375	38.0591	2.84564	2		-1	-1	0	0	-1	-1	-1	-1	-1	-1	-1
192.908	67.2857	61.8238	1	-1	1	23.6529	39.1149	3.01342	2		-1	-1	0	0	-1	-1	-1	-1	-1	-1	-1
198.211	140.206	42.5993	1	-1	1	23.9405	43.2019	0.687941	2		-1	-1	0	0	-1	-1	-1	-1	-1	-1	-1
135.897	143.852	57.1834	1	-1	1	-38.6533	35.8364	0.389608	2		-1	-1	0	0	-1	-1	-1	-1	-1	-1	-1
135.897	70.2688	62.4867	1	-1	1	-33.4284	40.2334	3.0168	2		-1	-1	0	0	-1	-1	-1	-1	-1	-1	-1
120.65	114.021	65.8013	1	-1	1	-51.8231	4.65426	0.948631	2		-1	-1	0	0	-1	-1	-1	-1	-1	-1	-1
120.65	124.296	43.9252	1	-1	1	-52.2859	28.7172	1.13987	2		-1	-1	0	0	-1	-1	-1	-1	-1	-1	-1
123.965	138.88	67.4586	1	-1	1	-50.3261	27.9812	0.115214	2		1	-1	0	0	-1	-1	-1	-1	-1	-1	-1
123.965	112.032	49.2285	1	-1	1	-48.1651	20.2178	1.55703	2		-1	-1	0	0	-1	-1	-1	-1	-1	-1	-1
125.953	83.8585	56.852	1	-1	1	-44.2517	29.6	2.7477	2		-1	-1	0	0	-1	-1	-1	-1	-1	-1	-1
133.908	85.5158	47.9027	1	-1	1	-36.3242	32.5811	2.46821	2		-1	-1	0	0	-1	-1	-1	-1	-1	-1	-1
150.481	140.206	95.9638	1	-1	1	-24.3355	41.1201	-0.669925	2		-1	-1	0	0	-1	-1	-1	-1	-1	-1	-1
229.368	123.633	65.66	4	-1	1	56.0089	20.377	0.167626	2		-1	-1	1	0	-1	-1	-1	-1	-1	-1	-1
219.756	123.965	65.66	4	-1	1	46.3573	20.069	0.173527	2		-1	-1	1	0	-1	-1	-1	-1	-1	-1	-1
212.132	84.19	65.66	4	-1	1	41.5154	20.4757	3.0564	2		-1	-1	1	0	-1	-1	-1	-1	-1	-1	-1
205.172	68.28	68.6	1	-1	1	35.6992	36.6681	-3.0908	2		-1	-1	0	0	-1	-1	-1	-1	-1	-1	-1
198.874	70.2688	68.6	1	-1	1	29.3031	35.1356	-3.09276	2		-1	-1	0	0	-1	-1	-1	-1	-1	-1	-1
190.587	73.2519	68.6	1	-1	1	20.8242	32.7559	-3.0957	2		-1	-1	0	0	-1	-1	-1	-1	-1	-1	-1
181.97	76.5665	68.6	1	-1	1	11.991	30.0697	-3.09926	2		-1	-1	0	0	-1	-1	-1	-1	-1	-1	-1
171.032	81.2068	68.6	1	-1	1	0.748417	26.2287	-3.10495	2		-1	-1	0	0	-1	-1	-1	-1	-1	-1	-1
252.57	47.0668	69.58	1	-1	1	83.8369	54.7508	-3.06992	2		-1	-1	0	0	-1	-1	-1	-1	-1	-1	-1
237.323	48.3927	69.58	1	-1	1	68.7595	54.3621	-3.0702	2		-1	-1	0	0	-1	-1	-1	-1	-1	-1	-1
222.739	50.0499	69.58	1	-1	1	54.2895	53.6577	-3.07131	2		-1	-1	0	0	-1	-1	-1	-1	-1	-1	-1
207.16	53.696	69.58	1	-1	1	38.6777	51.0893	-3.07278	2		-1	-1	0	0	-1	-1	-1	-1	-1	-1	-1
186.61	58.0049	69.58	1	-1	1	17.9415	48.2598	-3.07665	2		-1	-1	0	0	-1	-1	-1	-1	-1	-1	-1
246.272	154.127	69.58	1	-1	1	71.0203	51.7683	0.0151091	2		-1	-1	0	0	-1	-1	-1	-1	-1	-1	-1
237.654	154.127	69.58	1	-1	1	62.3003	51.2165	0.0155633	2		-1	-1	0	0	-1	-1	-1	-1	-1	-1	-1
224.728	153.133	69.58	1	-1	1	49.3067	49.3611	0.0163767	2		-1	-1	0	0	-1	-1	-1	-1	-1	-1	-1
214.121	153.133	69.58	1	-1	1	38.6065	48.6227	0.0181551	2		-1	-1	0	0	-1	-1	-1	-1	-1	-1	-1
206.497	152.801	69.58	1	-1	1	30.9583	47.7463	0.0196169	2		-1	-1	0	0	-1	-1	-1	-1	-1	-1	-1
201.526	153.133	69.58	1	-1	1	25.9759	47.7178	0.020925	2		-1	-1	0	0	-1	-1	-1	-1	-1	-1	-1
195.559	153.796	69.58	1	-1	1	19.978	47.9481	0.0226212	2		-1	-1	0	0	-1	-1	-1	-1	-1	-1	-1
189.593	154.127	69.58	1	-1	1	14.0038	47.8481	0.0241579	2		-1	-1	0	0	-1	-1	-1	-1	-1	-1	-1
259.53	157.442	71.54	1	-1	1	84.2562	55.9714	-0.0182762	2		-1	-1	0	0	-1	-1	-1	-1	-1	-1	-1
257.873	153.464	67.62	1	-1	1	82.815	51.7967	0.0526228	2		-1	-1	0	0	-1	-1	-1	-1	-1	-1	-1
263.176	152.139	67.62	1	-1	1	88.2686	50.7846	0.0528201	2		-1	-1	0	0	-1	-1	-1	-1	-1	-1	-1
274.446	152.47	67.62	1	-1	1	99.6817	51.7488	0.053182	2		-1	-1	1	0	-1	-1	-1	-1	-1	-1	-1
297.979	159.762	67.62	1	-1	1	123.267	60.2197	0.0545634	2		-1	-1	0	0	-1	-1	-1	-1	-1	-1	-1
309.58	161.419	67.62	1	-1	1	135.052	62.3885	0.0563334	2		-1	-1	0	0	-1	-1	-1	-1	-1	-1	-1
319.856	159.431	67.62	1	-1	1	145.652	60.8127	0.0591212	2		-1	-1	0	0	-1	-1	-1	-1	-1	-1	-1
325.822	160.093	67.62	1	-1	1	151.74	61.6942	0.0604916	2		-1	-1	0	0	-1	-1	-1	-1	-1	-1	-1
329.468	161.419	67.62	1	-1	1	155.432	63.1457	0.0611139	2		-1	-1	0	0	-1	-1	-1	-1	-1	-1	-1
336.428	160.425	67.62	1	-1	1	162.608	62.3785	0.0634551	2		-1	-1	0	0	-1	-1	-1	-1	-1	-1	-1
248.924	56.3476	66.64	1	-1	1	79.7035	45.7062	-3.12896	2		-1	-1	0	0	-1	-1	-1	-1	-1	-1	-1
237.323	57.6734	66.64	1	-1	1	68.1894	45.1033	-3.13	2		-1	-1	0	0	-1	-1	-1	-1	-1	-1	-1
227.711	59.3307	66.64	1	-1	1	58.6023	44.0743	-3.13186	2		-1	-1	0	0	-1	-1	-1	-1	-1	-1	-1
337.423	34.8029	70.56	1	-1	1	167.384	63.1916	-3.07251	2		-1	-1	0	0	-1	-1	-1	-1	-1	-1	-1
329.468	34.8029	70.56	1	-1	1	159.641	63.4366	-3.07014	2		-1	-1	0	0	-1	-1	-1	-1	-1	-1	-1
316.541	38.449	70.56	1	-1	1	146.918	60.2481	-3.06491	2		-1	-1	0	0	-1	-1	-1	-1	-1	-1	-1
302.62	40.7692	70.56	1	-1	1	133.229	58.4935	-3.06048	2		-1	-1	0	0	-1	-1	-1	-1	-1	-1	-1
292.345	42.7579	70.56	1	-1	1	123.089	56.9696	-3.05741	2		-1	-1	0	0	-1	-1	-1	-1	-1	-1	-1
279.418	43.7523	70.56	1	-1	1	110.377	56.61	-3.05518	2		-1	-1	0	0	-1	-1	-1	-1	-1	-1	-1
265.828	46.7354	70.56	1	-1	1	96.8851	54.3577	-3.05209	2		-1	-1	0	0	-1	-1	-1	-1	-1	-1	-1
249.918	57.0105	60.76	1	-1	1	80.6484	45.5523	3.02403	2		-1	-1	1	0	-1	-1	-1	-1	-1	-1	-1
216.441	60.988	60.76	1	-1	1	47.4198	43.7961	3.01363	2		-1	-1	1	0	-1	-1	-1	-1	-1	-1	-1
189.262	64.3026	55.86	1	-1	1	20.3064	43.662	2.88978	2		-1	-1	0	0	-1	-1	-1	-1	-1	-1	-1
181.638	66.9542	55.86	1	-1	1	12.5125	41.6905	2.87284	2		-1	-1	0	0	-1	-1	-1	-1	-1	-1	-1
167.386	69.2744	55.86	1	-1	1	-1.8689	40.5233	2.85876	2		-1	-1	0	0	-1	-1	-1	-1	-1	-1	-1
168.711	62.6453	55.86	1	-1	1	-0.0698676	46.7373	2.90403	2		-1	-1	0	0	-1	-1	-1	-1	-1	-1	-1
230.031	150.481	52.92	1	-1	1	54.9631	49.4652	0.358216	2		-1	-1	0	0	-1	-1	-1	-1	-1	-1	-1
255.553	152.801	50.96	1	-1	1	80.5195	53.7876	0.368323	2		-1	-1	0	0	-1	-1	-1	-1	-1	-1	-1
153.796	110.706	44.2566	1	-1	1	-18.2556	24.8577	1.53439	2		-1	-1	0	0	-1	-1	-1	-1	-1	-1	-1
153.796	101.094	41.605	1	-1	1	-17.5308	28.4655	1.88364	2		-1	-1	0	0	-1	-1	-1	-1	-1	-1	-1
153.796	104.74	53.206	1	-1	1	-17.9394	16.3231	1.85953	2		-1	-1	0	0	-1	-1	-1	-1	-1	-1	-1
153.796	128.937	34.6444	1	-1	1	-19.4453	39.8687	1.08525	2		-1	-1	0	0	-1	-1	-1	-1	-1	-1	-1
153.796	129.268	56.852	1	-1	1	-19.7494	23.8307	0.582571	2		-1	-1	0	0	-1	-1	-1	-1	-1	-1	-1
153.796	130.262	65.1384	1	-1	1	-19.9256	21.8157	0.225199	2		-1	-1	0	0	-1	-1	-1	-1	-1	-1	-1
153.796	93.1393	63.8126	1	-1	1	-17.239	16.415	2.86156	2		-1	-1	0	0	-1	-1	-1	-1	-1	-1	-1
153.796	87.5045	61.1609	1	-1	1	-16.8003	22.5961	2.82932	2		-1	-1	0	0	-1	-1	-1	-1	-1	-1	-1
153.796	85.5158	72.099	1	-1	1	-16.7954	23.374	-2.96484	2		-1	-1	0	0	-1	-1	-1	-1	-1	-1	-1
192.908	146.504	77.42	1	-1	1	17.7588	41.4274	-0.17167	2		-1	-1	0	0	-1	-1	-1	-1	-1	-1	-1
186.279	145.841	77.42	1	-1	1	11.1951	40.2983	-0.175701	2		-1	-1	0	0	-1	-1	-1	-1	-1	-1	-1
179.318	145.509	77.42	1	-1	1	4.27691	39.468	-0.178127	2		-1	-1	0	0	-1	-1	-1	-1	-1	-1	-1
202.188	140.869	77.42	1	-1	1	27.4201	36.6337	-0.203896	2		-1	-1	0	0	-1	-1	-1	-1	-1	-1	-1
214.121	144.515	81.0483	1	-1	1	39.0927	41.9869	-0.265042	2		-1	-1	0	0	-1	-1	-1	-1	-1	-1	-1
212.132	140.869	77.42	1	-1	1	37.389	37.3541	-0.202395	2		-1	-1	1	0	-1	-1	-1	-1	-1	-1	-1
193.239	140.538	77.42	1	-1	1	18.5185	35.6618	-0.207537	2		-1	-1	0	0	-1	-1	-1	-1	-1	-1	-1
186.279	138.88	77.42	1	-1	1	11.6957	33.5572	-0.221028	2		-1	-1	0	0	-1	-1	-1	-1	-1	-1	-1
176.666	133.246	77.42	1	-1	1	2.51432	27.4774	-0.27718	2		-1	-1	0	0	-1	-1	-1	-1	-1	-1	-1
172.026	128.605	77.42	1	-1	1	-1.77996	22.8004	-0.34371	2		-1	-1	0	0	-1	-1	-1	-1	-1	-1	-1
167.717	96.4538	77.42	1	-1	1	-3.76516	14.1484	-2.44619	2		2	-1	0	0	-1	-1	-1	-1	-1	-1	-1
171.032	91.482	77.42	1	-1	1	-0.101882	18.1536	-2.60218	2		-1	-1	0	0	-1	-1	-1	-1	-1	-1	-1
175.672	85.1843	77.42	1	-1	1	4.97903	23.5821	-2.7198	2		-1	-1	0	0	-1	-1	-1	-1	-1	-1	-1
175.009	79.881	77.42	1	-1	1	4.69929	28.6112	-2.7887	2		-1	-1	0	0	-1	-1	-1	-1	-1	-1	-1
193.239	72.2575	77.42	1	-1	1	23.429	34.7201	-2.83725	2		-1	-1	0	0	-1	-1	-1	-1	-1	-1	-1
203.514	69.9373	77.42	1	-1	1	33.8342	36.2775	-2.84493	2		-1	-1	0	0	-1	-1	-1	-1	-1	-1	-1
206.829	63.6397	77.42	1	-1	1	37.5662	42.169	-2.87975	2		-1	-1	0	0	-1	-1	-1	-1	-1	-1	-1
221.413	60.3251	77.42	1	-1	1	52.2369	44.445	-2.88787	2		-1	-1	0	0	-1	-1	-1	-1	-1	-1	-1
230.362	58.9993	77.42	1	-1	1	61.1792	45.1704	-2.88996	2		-1	-1	0	0	-1	-1	-1	-1	-1	-1	-1
208.486	150.15	98	1	-1	1	32.7862	54.061	-0.537584	2		-1	-1	0	0	-1	-1	-1	-1	-1	-1	-1
202.188	151.144	98	1	-1	1	26.4213	54.4692	-0.530919	2		-1	-1	0	0	-1	-1	-1	-1	-1	-1	-1
220.75	129.268	107.8	1	-1	1	46.5964	46.9378	-0.960975	2		-1	-1	0	0	-1	-1	-1	-1	-1	-1	-1
211.801	129.599	107.8	1	-1	1	37.5121	46.7023	-0.965382	2		-1	-1	0	0	-1	-1	-1	-1	-1	-1	-1
204.509	129.599	107.8	1	-1	1	30.1611	46.3505	-0.973969	2		-1	-1	0	0	-1	-1	-1	-1	-1	-1	-1
196.222	128.605	107.8	1	-1	1	21.9683	45.4436	-1.00247	2		-1	-1	0	0	-1	-1	-1	-1	-1	-1	-1
205.834	123.965	107.8	1	-1	1	31.8886	43.709	-1.08183	2		-1	-1	0	0	-1	-1	-1	-1	-1	-1	-1
214.452	123.302	107.8	1	-1	1	40.6441	43.7786	-1.08367	2		-1	-1	0	0	-1	-1	-1	-1	-1	-1	-1
221.081	123.302	107.8	1	-1	1	47.3478	44.0373	-1.07476	2		-1	-1	0	0	-1	-1	-1	-1	-1	-1	-1
294.333	139.875	107.8	1	-1	1	120.894	56.3856	-0.734695	2		-1	-1	0	0	-1	-1	-1	-1	-1	-1	-1
282.732	138.217	107.8	1	-1	1	109.108	54.8878	-0.764566	2		-1	-1	0	0	-1	-1	-1	-1	-1	-1	-1
274.115	138.88	107.8	1	-1	1	100.266	55.0647	-0.762577	2		-1	-1	0	0	-1	-1	-1	-1	-1	-1	-1
313.558	139.543	107.8	1	-1	1	140.61	56.5859	-0.725189	2		-1	-1	0	0	-1	-1	-1	-1	-1	-1	-1
324.164	140.869	107.8	1	-1	1	151.442	57.7244	-0.702194	2		-1	-1	0	0	-1	-1	-1	-1	-1	-1	-1
230.031	79.5496	107.8	1	-1	1	59.3255	46.2103	-2.06559	2		-1	-1	0	0	-1	-1	-1	-1	-1	-1	-1
222.739	80.2125	107.8	1	-1	1	51.9768	46.0763	-2.06296	2		-1	-1	0	0	-1	-1	-1	-1	-1	-1	-1
209.481	143.521	107.8	1	-1	1	34.1549	55.2401	-0.753322	2		-1	-1	0	0	-1	-1	-1	-1	-1	-1	-1
223.733	144.846	107.8	1	-1	1	48.537	56.9912	-0.725844	2		-1	-1	0	0	-1	-1	-1	-1	-1	-1	-1
194.234	140.869	107.8	1	-1	1	19.1029	52.5464	-0.801751	2		-1	-1	0	0	-1	-1	-1	-1	-1	-1	-1
183.295	140.869	107.8	1	-1	1	8.194	51.9227	-0.811317	2		-1	-1	0	0	-1	-1	-1	-1	-1	-1	-1
201.526	110.375	107.8	1	-1	1	28.5685	39.6825	-1.40127	2		-1	-1	0	0	-1	-1	-1	-1	-1	-1	-1
218.098	109.381	107.8	1	-1	1	45.3057	39.8938	-1.39709	2		-1	-1	0	0	-1	-1	-1	-1	-1	-1	-1
224.065	107.723	107.8	1	-1	1	51.4353	39.8027	-1.42809	2		-1	-1	0	0	-1	-1	-1	-1	-1	-1	-1
223.402	103.083	107.8	1	-1	1	51.0847	39.605	-1.54548	2		-1	-1	0	0	-1	-1	-1	-1	-1	-1	-1
167.054	100.431	107.8	1	-1	1	-5.09585	39.6196	-1.71439	2		-1	-1	0	0	-1	-1	-1	-1	-1	-1	-1
177.661	100.431	107.8	1	-1	1	5.48244	39.6171	-1.69491	2		-1	-1	0	0	-1	-1	-1	-1	-1	-1	-1
182.301	100.431	107.8	1	-1	1	10.1104	39.6208	-1.68639	2		-1	-1	0	0	-1	-1	-1	-1	-1	-1	-1
186.941	100.1	107.8	1	-1	1	14.7623	39.6783	-1.68608	2		-1	-1	0	0	-1	-1	-1	-1	-1	-1	-1
213.789	94.7966	107.8	1	-1	1	41.991	40.6675	-1.76625	2		-1	-1	0	0	-1	-1	-1	-1	-1	-1	-1
219.093	95.4595	107.8	1	-1	1	47.274	40.4865	-1.74127	2		-1	-1	0	0	-1	-1	-1	-1	-1	-1	-1
226.053	96.1224	107.8	1	-1	1	54.2264	40.3173	-1.71348	2		-1	-1	0	0	-1	-1	-1	-1	-1	-1	-1
213.127	117.667	110.74	1	-1	1	39.673	44.4252	-1.22854	2		-1	-1	0	0	-1	-1	-1	-1	-1	-1	-1
203.183	117.667	110.74	1	-1	1	29.6598	44.1066	-1.24323	2		-1	-1	0	0	-1	-1	-1	-1	-1	-1	-1
205.834	123.633	110.74	1	-1	1	31.8753	46.2428	-1.11579	2		-1	-1	0	0	-1	-1	-1	-1	-1	-1	-1
212.795	123.965	110.74	1	-1	1	38.8886	46.6558	-1.10015	2		-1	-1	0	0	-1	-1	-1	-1	-1	-1	-1
221.081	123.633	110.74	1	-1	1	47.2978	46.8343	-1.09596	2		-1	-1	0	0	-1	-1	-1	-1	-1	-1	-1
230.694	123.633	110.74	1	-1	1	57.0332	47.1787	-1.08396	2		-1	-1	0	0	-1	-1	-1	-1	-1	-1	-1
237.986	124.959	110.74	1	-1	1	64.3378	48.0184	-1.05036	2		-1	-1	0	0	-1	-1	-1	-1	-1	-1	-1
245.941	123.302	110.74	1	-1	1	72.5151	47.5285	-1.07195	2		-1	-1	0	0	-1	-1	-1	-1	-1	-1	-1
241.963	119.656	110.74	1	-1	1	68.7149	45.9345	-1.1479	2		-1	-1	0	0	-1	-1	-1	-1	-1	-1	-1
241.3	114.352	110.74	1	-1	1	68.3851	44.2287	-1.25995	2		-1	-1	0	0	-1	-1	-1	-1	-1	-1	-1
232.351	97.1168	110.74	1	-1	1	60.477	43.0304	-1.66851	2		-1	-1	0	0	-1	-1	-1	-1	-1	-1	-1
222.076	87.5045	110.74	1	-1	1	50.7918	45.5581	-1.89337	2		-1	-1	0	0	-1	-1	-1	-1	-1	-1	-1
213.458	87.5045	110.74	1	-1	1	42.14	45.6999	-1.90617	2		-1	-1	0	0	-1	-1	-1	-1	-1	-1	-1
207.823	89.1618	110.74	1	-1	1	36.3661	45.1912	-1.88101	2		-1	-1	0	0	-1	-1	-1	-1	-1	-1	-1
229.036	87.5045	110.74	1	-1	1	57.7817	45.4413	-1.88334	2		-1	-1	0	0	-1	-1	-1	-1	-1	-1	-1
214.784	139.212	111.72	1	-1	1	39.8028	55.6184	-0.854066	2		-1	-1	0	0	-1	-1	-1	-1	-1	-1	-1
195.228	136.56	111.72	1	-1	1	20.355	52.9903	-0.911067	2		-1	-1	0	0	-1	-1	-1	-1	-1	-1	-1
186.279	132.251	111.72	1	-1	1	11.7394	50.1935	-0.990153	2		-1	-1	0	0	-1	-1	-1	-1	-1	-1	-1
195.559	131.588	111.72	1	-1	1	21.0431	50.2976	-0.991245	2		-1	-1	0	0	-1	-1	-1	-1	-1	-1	-1
273.783	139.875	111.72	1	-1	1	99.8885	58.6022	-0.796981	2		-1	-1	0	0	-1	-1	-1	-1	-1	-1	-1
283.727	137.886	111.72	1	-1	1	110.169	57.5945	-0.81507	2		-1	-1	0	0	-1	-1	-1	-1	-1	-1	-1
293.67	139.875	111.72	1	-1	1	120.253	59.1849	-0.78237	2		-1	-1	0	0	-1	-1	-1	-1	-1	-1	-1
255.553	137.886	111.72	1	-1	1	81.3829	56.6492	-0.837486	2		-1	-1	0	0	-1	-1	-1	-1	-1	-1	-1
230.694	129.268	116.62	1	-1	1	56.6122	54.9629	-1.03768	2		-1	-1	0	0	-1	-1	-1	-1	-1	-1	-1
216.441	129.931	116.62	1	-1	1	42.0938	54.7093	-1.0419	2		-1	-1	0	0	-1	-1	-1	-1	-1	-1	-1
204.177	130.262	116.62	1	-1	1	29.6715	54.3309	-1.04966	2		-1	-1	0	0	-1	-1	-1	-1	-1	-1	-1
194.896	130.594	116.62	1	-1	1	20.3916	54.072	-1.05418	2		-1	-1	0	0	-1	-1	-1	-1	-1	-1	-1
227.379	94.1336	116.62	1	-1	1	55.6305	49.3463	-1.71814	2		-1	-1	0	0	-1	-1	-1	-1	-1	-1	-1
252.57	117.999	116.62	1	-1	1	79.5629	51.1426	-1.20865	2		-1	-1	0	0	-1	-1	-1	-1	-1	-1	-1
263.839	116.01	116.62	1	-1	1	91.1257	50.7383	-1.23311	2		-1	-1	0	0	-1	-1	-1	-1	-1	-1	-1
274.777	117.667	116.62	1	-1	1	102.148	51.4075	-1.19066	2		-1	-1	0	0	-1	-1	-1	-1	-1	-1	-1
241.632	118.993	116.62	1	-1	1	68.3984	51.2161	-1.2029	2		-1	-1	0	0	-1	-1	-1	-1	-1	-1	-1
300.963	134.903	116.62	1	-1	1	128.015	59.9586	-0.89374	2		-1	-1	0	0	-1	-1	-1	-1	-1	-1	-1
166.391	105.403	64.6412	1	-1	1	-5.56975	4.88109	2.13268	1.66854		2	-1	0	0	-1	-1	-1	-1	-1	-1	-1
165.397	109.049	52.92	1	-1	1	-6.67571	16.0108	1.54205	1.66854		2	-1	0	0	-1	-1	-1	-1	-1	-1	-1
167.551	103.746	52.92	1	-1	1	-4.1456	16.4322	1.85801	1.66854		2	-1	0	0	-1	-1	-1	-1	-1	-1	-1
165.065	111.535	67.2929	1	-1	1	-7.3665	3.93491	0.465129	1.66854		2	-1	0	0	-1	-1	-1	-1	-1	-1	-1
197.051	119.324	53.9	3	-1	1	24.1426	19.9963	0.863215	1.66854		2	-1	0	0	2	-1	-1	-1	-1	-1	-1
191.913	118.661	53.9	3	-1	1	19.0664	19.3553	0.904276	1.66854		2	-1	0	0	2	-1	-1	-1	-1	-1	-1
206.995	120.319	53.9	3	-1	1	33.9879	21.1139	0.800275	1.66854		2	-1	0	0	2	-1	-1	-1	-1	-1	-1
233.677	120.153	48.02	3	-1	1	60.6595	26.3592	0.912765	1.66854		2	-1	0	0	2	-1	-1	-1	-1	-1	-1
238.152	119.656	48.02	3	-1	1	65.1539	26.2085	0.918169	1.66854		2	-1	0	0	2	-1	-1	-1	-1	-1	-1
250.913	122.142	48.02	3	-1	1	77.7332	28.3985	0.828712	1.66854		2	-1	0	0	2	-1	-1	-1	-1	-1	-1
254.89	120.982	48.02	3	-1	1	81.7754	27.7531	0.851928	1.66854		2	-1	0	0	2	-1	-1	-1	-1	-1	-1
258.868	120.982	48.02	3	-1	1	85.7479	27.9164	0.845829	1.66854		2	-1	0	0	2	-1	-1	-1	-1	-1	-1
263.674	121.147	48.02	3	-1	1	90.5398	28.2309	0.834665	1.66854		2	-1	0	0	2	-1	-1	-1	-1	-1	-1
236.328	95.4595	49.98	4	-1	1	64.8836	19.5979	2.00191	1.66854		2	-1	0	0	2	-1	-1	-1	-1	-1	-1
241.135	94.6308	49.98	4	-1	1	69.7014	19.7826	2.02672	1.66854		2	-1	0	0	2	-1	-1	-1	-1	-1	-1
247.267	94.1336	49.98	4	-1	1	75.8113	19.8129	2.03246	1.66854		2	-1	0	0	2	-1	-1	-1	-1	-1	-1
254.061	93.6365	49.98	4	-1	1	82.5772	19.8401	2.03668	1.66854		2	-1	0	0	2	-1	-1	-1	-1	-1	-1
224.23	96.1224	53.7103	4	-1	1	52.8153	16.3385	2.09427	1.66854		2	-1	0	0	2	-1	-1	-1	-1	-1	-1
208.32	97.4482	47.0812	3	-1	1	37.0093	22.4951	1.94505	1.66854		-1	-1	0	0	2	-1	-1	-1	-1	-1	-1
204.177	99.4369	48.0756	3	-1	1	32.7493	21.0915	1.88398	1.66854		-1	-1	0	0	2	-1	-1	-1	-1	-1	-1
258.536	93.9679	49.98	4	-1	1	86.994	19.6042	2.00912	1.66854		-1	-1	1	0	-1	-1	-1	-1	-1	-1	-1
184.953	104.077	49.98	4	-1	1	13.2227	18.8151	1.74125	1.66854		-1	-1	1	0	-1	-1	-1	-1	-1	-1	-1
333.777	81.704	55.86	5	-1	1	162.146	20.9198	2.51506	1.66854		-1	-1	0	0	-1	-1	-1	-1	-1	-1	-1
342.063	81.3726	55.86	5	-1	1	170.356	21.0954	2.51155	1.66854		-1	-1	0	0	-1	-1	-1	-1	-1	-1	-1
353.498	80.3782	55.86	5	-1	1	181.696	21.8116	2.52282	1.66854		-1	-1	0	0	-1	-1	-1	-1	-1	-1	-1
368.911	80.0467	55.86	4	-1	1	196.955	22.0794	2.51045	1.66854		-1	-1	0	0	-1	-1	-1	-1	-1	-1	-1
378.855	79.881	55.86	4	-1	1	206.801	22.2723	2.50216	1.66854		-1	-1	0	0	-1	-1	-1	-1	-1	-1	-1
274.446	86.013	55.86	5	-1	1	103.22	19.0725	2.48648	1.66854		-1	-1	0	0	-1	-1	-1	-1	-1	-1	-1
267.485	87.0073	55.86	5	-1	1	96.2697	18.587	2.46629	1.66854		-1	-1	0	0	-1	-1	-1	-1	-1	-1	-1
282.235	85.5158	55.86	5	-1	1	110.962	19.1728	2.48782	1.66854		-1	-1	0	0	2	-1	-1	-1	-1	-1	-1
288.699	84.3557	55.86	5	-1	1	117.42	19.8549	2.51307	1.66854		-1	-1	0	0	2	-1	-1	-1	-1	-1	-1
296.819	84.3557	55.86	5	-1	1	125.461	19.6073	2.49795	1.66854		-1	-1	0	0	2	-1	-1	-1	-1	-1	-1
362.116	80.0467	55.86	5	-1	1	190.23	22.0625	2.51979	1.66854		-1	-1	0	0	2	-1	-1	-1	-1	-1	-1
302.786	84.19	55.86	5	-1	1	131.377	19.5741	2.49213	1.66854		-1	-1	0	0	3	-1	-1	-1	-1	-1	-1
308.917	82.0355	55.86	5	-1	1	137.536	21.1147	2.54662	1.66854		-1	-1	0	0	3	-1	-1	-1	-1	-1	-1
317.701	81.704	55.86	5	-1	1	146.24	21.1818	2.54145	1.66854		-1	-1	0	0	3	-1	-1	-1	-1	-1	-1
324.993	82.0355	55.86	5	-1	1	153.443	20.7844	2.51975	1.66854		-1	-1	0	0	3	-1	-1	-1	-1	-1	-1
259.53	87.836	56.84	5	-1	1	88.3402	17.6547	2.49473	1.66854		-1	-1	0	0	-1	-1	-1	-1	-1	-1	-1
252.073	88.6646	56.84	5	-1	1	80.8971	17.3568	2.48047	1.66854		-1	-1	0	0	-1	-1	-1	-1	-1	-1	-1
243.455	89.659	56.84	5	-1	1	72.29	17.0158	2.46195	1.66854		-1	-1	0	0	2	-1	-1	-1	-1	-1	-1
442.66	79.881	56.84	5	-1	1	270.122	22.974	2.47588	1.66854		-1	-1	0	0	2	-1	-1	-1	-1	-1	-1
436.362	80.3782	56.84	5	-1	1	263.869	22.4086	2.46533	1.66854		-1	-1	0	0	2	-1	-1	-1	-1	-1	-1
428.739	80.3782	56.84	5	-1	1	256.295	22.1921	2.4706	1.66854		-1	-1	0	0	2	-1	-1	-1	-1	-1	-1
384.821	168.38	75.46	1	-1	1	212.503	71.4794	-0.0321704	2		-1	-1	0	0	-1	-1	-1	-1	-1	-1	-1
481.606	168.048	75.46	1	-1	1	311.781	69.9131	0.00732556	2		-1	-1	0	0	-1	-1	-1	-1	-1	-1	-1
451.775	168.711	75.46	1	-1	1	281.381	71.3024	-0.00378805	2		-1	-1	0	0	-1	-1	-1	-1	-1	-1	-1
430.562	167.386	75.46	1	-1	1	259.623	70.3285	-0.0136309	2		-1	-1	0	0	-1	-1	-1	-1	-1	-1	-1
404.377	165.728	75.46	1	-1	1	232.686	68.8746	-0.0265777	2		-1	-1	0	0	-1	-1	-1	-1	-1	-1	-1
405.703	66.2913	11.7739	1	-1	1	232.099	66.4258	2.09521	2		-1	-1	0	0	-1	-1	-1	-1	-1	-1	-1
405.703	73.5833	12.4368	1	-1	1	232.118	62.7677	1.99695	2		-1	-1	0	0	-1	-1	-1	-1	-1	-1	-1
409.68	109.712	11.76	1	-1	1	236.081	60.3712	1.40249	2		-1	-1	0	0	-1	-1	-1	-1	-1	-1	-1
392.445	109.381	11.76	1	-1	1	218.833	59.7977	1.40671	2		-1	-1	0	0	-1	-1	-1	-1	-1	-1	-1
409.68	93.1393	11.76	1	-1	1	236.054	59.1507	1.68	2		-1	-1	0	0	-1	-1	-1	-1	-1	-1	-1
412.332	83.1956	11.76	1	-1	1	238.666	60.7004	1.84423	2		-1	-1	0	0	-1	-1	-1	-1	-1	-1	-1
416.972	73.9148	11.76	1	-1	1	243.227	63.5992	1.98656	2		-1	-1	0	0	-1	-1	-1	-1	-1	-1	-1
429.568	71.5946	11.76	1	-1	1	255.672	64.8664	2.01904	2		-1	-1	0	0	-1	-1	-1	-1	-1	-1	-1
434.208	66.6228	11.76	1	-1	1	260.214	67.1276	2.08702	2		-1	-1	0	0	-1	-1	-1	-1	-1	-1	-1
433.877	59.9936	11.76	1	-1	1	259.813	70.3829	2.171	2		-1	-1	0	0	-1	-1	-1	-1	-1	-1	-1
454.758	69.6059	10.78	1	-1	1	280.615	67.4014	2.04087	2		-1	-1	0	0	-1	-1	-1	-1	-1	-1	-1
455.09	74.9092	10.78	1	-1	1	281.043	65.3974	1.967	2		-1	-1	0	0	-1	-1	-1	-1	-1	-1	-1
486.247	73.5833	10.78	1	-1	1	312.141	66.941	1.99124	2		-1	-1	0	0	-1	-1	-1	-1	-1	-1	-1
481.938	68.943	10.78	1	-1	1	307.705	68.6317	2.05317	2		-1	-1	0	0	-1	-1	-1	-1	-1	-1	-1
474.977	62.3138	10.78	1	-1	1	300.589	71.4473	2.13613	2		-1	-1	0	0	-1	-1	-1	-1	-1	-1	-1
473.32	57.0105	10.78	1	-1	1	298.811	74.1721	2.19799	2		-1	-1	0	0	-1	-1	-1	-1	-1	-1	-1
398.079	133.908	13.72	1	-1	1	224.442	67.6519	1.0377	2		-1	-1	0	0	-1	-1	-1	-1	-1	-1	-1
380.181	134.24	13.72	1	-1	1	206.361	67.3362	1.0311	2		-1	-1	0	0	-1	-1	-1	-1	-1	-1	-1
431.888	131.92	13.72	1	-1	1	258.668	67.3914	1.07232	2		-1	-1	0	0	-1	-1	-1	-1	-1	-1	-1
427.579	137.223	13.72	1	-1	1	254.349	70.19	1.00605	2		-1	-1	0	0	-1	-1	-1	-1	-1	-1	-1
476.634	139.543	13.72	1	-1	1	304.282	72.1973	1.00112	2		-1	-1	0	0	-1	-1	-1	-1	-1	-1	-1
483.927	135.897	13.72	1	-1	1	311.601	70.2234	1.04745	2		-1	-1	0	0	-1	-1	-1	-1	-1	-1	-1
418.961	116.341	13.72	1	-1	1	245.484	60.4996	1.28982	2		-1	-1	0	0	-1	-1	-1	-1	-1	-1	-1
398.742	117.667	13.72	1	-1	1	225.162	60.3745	1.26539	2		-1	-1	0	0	-1	-1	-1	-1	-1	-1	-1
391.45	117.999	13.72	1	-1	1	217.842	60.2783	1.25955	2		-1	-1	0	0	-1	-1	-1	-1	-1	-1	-1
444.152	117.667	13.72	1	-1	1	270.887	61.5672	1.27743	2		-1	-1	0	0	-1	-1	-1	-1	-1	-1	-1
473.983	57.0105	13.72	1	-1	1	299.551	71.7633	2.22063	2		-1	-1	0	0	-1	-1	-1	-1	-1	-1	-1
475.309	80.2125	9.8	1	-1	1	301.332	65.3766	1.88887	2		-1	-1	0	0	-1	-1	-1	-1	-1	-1	-1
449.124	79.5496	9.8	1	-1	1	275.149	64.6851	1.89379	2		-1	-1	0	0	-1	-1	-1	-1	-1	-1	-1
446.803	93.1393	9.4537	1	-1	1	273.041	62.5944	1.68171	2		-1	-1	0	0	-1	-1	-1	-1	-1	-1	-1
446.803	101.094	9.12224	1	-1	1	273.158	62.8944	1.55482	2		-1	-1	0	0	-1	-1	-1	-1	-1	-1	-1
446.803	117.999	10.7795	1	-1	1	273.48	64.5165	1.28863	2		-1	-1	0	0	-1	-1	-1	-1	-1	-1	-1
439.511	86.8416	8.45933	1	-1	1	265.63	64.0778	1.77745	2		-1	-1	0	0	-1	-1	-1	-1	-1	-1	-1
439.511	107.392	11.111	1	-1	1	265.985	61.419	1.4484	2		-1	-1	0	0	-1	-1	-1	-1	-1	-1	-1
452.107	126.948	10.7795	1	-1	1	279	68.0127	1.16567	2		-1	-1	0	0	-1	-1	-1	-1	-1	-1	-1
452.107	146.172	17.7401	1	-1	1	279.561	72.9679	0.883285	2		-1	-1	0	0	-1	-1	-1	-1	-1	-1	-1
452.107	154.459	24.3692	1	-1	1	279.914	74.3213	0.740337	2		-1	-1	0	0	-1	-1	-1	-1	-1	-1	-1
452.107	159.099	35.9702	1	-1	1	280.35	71.4246	0.573457	2		-1	-1	0	0	-1	-1	-1	-1	-1	-1	-1
452.107	164.071	63.1497	1	-1	1	281.262	67.1805	0.177003	2		-1	-1	0	0	-1	-1	-1	-1	-1	-1	-1
452.107	32.1513	69.4473	1	-1	1	279.034	65.3711	-3.13844	2		-1	-1	0	0	-1	-1	-1	-1	-1	-1	-1
452.107	28.5053	80.0539	1	-1	1	279.276	69.4265	-2.98312	2		-1	-1	0	0	-1	-1	-1	-1	-1	-1	-1
391.45	58.3363	18.62	1	-1	1	218.343	64.5396	2.25771	2		-1	-1	0	0	-1	-1	-1	-1	-1	-1	-1
367.254	58.0049	18.62	1	-1	1	194.727	64.3784	2.27114	2		-1	-1	0	0	-1	-1	-1	-1	-1	-1	-1
374.877	53.696	18.62	1	-1	1	202.216	67.1762	2.31885	2		-1	-1	0	0	-1	-1	-1	-1	-1	-1	-1
365.928	39.1119	38.6219	1	-1	1	194.244	65.9419	2.69622	2		-1	-1	0	0	-1	-1	-1	-1	-1	-1	-1
316.541	140.538	25.48	1	-1	1	142.371	59.9902	0.844334	2		-1	-1	0	0	-1	-1	-1	-1	-1	-1	-1
348.692	141.2	25.48	1	-1	1	174.745	61.6105	0.831164	2		-1	-1	0	0	-1	-1	-1	-1	-1	-1	-1
361.619	141.532	25.48	1	-1	1	187.804	62.2644	0.827464	2		-1	-1	0	0	-1	-1	-1	-1	-1	-1	-1
371.563	140.206	25.48	1	-1	1	197.891	61.6346	0.843562	2		-1	-1	0	0	-1	-1	-1	-1	-1	-1	-1
385.152	139.212	25.48	1	-1	1	211.667	61.3267	0.857463	2		-1	-1	0	0	-1	-1	-1	-1	-1	-1	-1
397.085	140.206	25.48	1	-1	1	223.762	62.3119	0.848748	2		-1	-1	0	0	-1	-1	-1	-1	-1	-1	-1
417.304	156.116	25.48	1	-1	1	244.378	74.5816	0.700142	2		-1	-1	0	0	-1	-1	-1	-1	-1	-1	-1
491.219	155.453	25.48	1	-1	1	319.897	74.3384	0.739769	2		-1	-1	0	0	-1	-1	-1	-1	-1	-1	-1
367.585	125.622	25.48	2	-1	1	194.114	52.4086	1.04411	2		-1	-1	1	0	-1	-1	-1	-1	-1	-1	-1
359.962	125.291	25.48	2	-1	1	186.46	51.9939	1.04979	2		-1	-1	1	0	-1	-1	-1	-1	-1	-1	-1
319.193	125.291	25.48	2	-1	1	145.616	50.665	1.06093	2		-1	-1	1	0	-1	-1	-1	-1	-1	-1	-1
325.822	79.5496	25.48	2	-1	1	153.818	47.1345	2.02482	2		-1	-1	1	0	-1	-1	-1	-1	-1	-1	-1
304.277	125.622	25.48	2	-1	1	130.704	50.3445	1.06342	2		-1	-1	1	0	-1	-1	-1	-1	-1	-1	-1
469.674	126.616	23.52	2	-1	1	297.166	56.8798	1.08356	2		-1	-1	1	0	-1	-1	-1	-1	-1	-1	-1
477.297	126.285	23.52	2	-1	1	304.88	56.8008	1.09334	2		-1	-1	0	0	-1	-1	-1	-1	-1	-1	-1
486.247	126.948	23.52	2	-1	1	313.964	57.2174	1.08903	2		-1	-1	0	0	-1	-1	-1	-1	-1	-1	-1
452.107	124.628	23.52	2	-1	1	279.339	55.6343	1.10405	2		-1	-1	0	0	-1	-1	-1	-1	-1	-1	-1
429.236	123.965	23.52	2	-1	1	256.204	54.8664	1.10333	2		-1	-1	0	0	-1	-1	-1	-1	-1	-1	-1
424.596	74.5777	23.52	2	-1	1	251.129	52.7666	2.05523	2		-1	-1	0	0	-1	-1	-1	-1	-1	-1	-1
416.309	74.5777	23.52	2	-1	1	242.927	52.5173	2.05639	2		-1	-1	0	0	-1	-1	-1	-1	-1	-1	-1
408.023	73.5833	23.52	2	-1	1	234.735	52.7163	2.07504	2		-1	-1	0	0	-1	-1	-1	-1	-1	-1	-1
503.482	75.5721	23.52	2	-1	1	329.789	55.0477	2.04877	2		-1	-1	0	0	-1	-1	-1	-1	-1	-1	-1
360.956	97.4482	23.52	2	-1	1	187.958	45.9118	1.61426	2		-1	-1	1	0	-1	-1	-1	-1	-1	-1	-1
356.647	76.235	23.52	2	-1	1	184.133	50.517	2.04918	2		-1	-1	0	0	-1	-1	-1	-1	-1	-1	-1
348.692	76.5665	23.52	2	-1	1	176.316	50.2871	2.04796	2		-1	-1	0	0	-1	-1	-1	-1	-1	-1	-1
357.973	88.4989	22.54	2	-1	1	185.162	47.6781	1.80423	2		-1	-1	0	0	-1	-1	-1	-1	-1	-1	-1
365.265	88.4989	22.54	2	-1	1	192.363	47.8291	1.80071	2		-1	-1	0	0	-1	-1	-1	-1	-1	-1	-1
373.22	87.836	22.54	2	-1	1	200.236	48.1341	1.81092	2		-1	-1	0	0	-1	-1	-1	-1	-1	-1	-1
380.181	87.5045	22.54	2	-1	1	207.124	48.3668	1.81515	2		-1	-1	0	0	-1	-1	-1	-1	-1	-1	-1
389.793	86.5101	22.54	2	-1	1	216.646	48.8197	1.83234	2		-1	-1	0	0	-1	-1	-1	-1	-1	-1	-1
397.748	86.8416	22.54	2	-1	1	224.526	48.966	1.82395	2		-1	-1	0	0	-1	-1	-1	-1	-1	-1	-1
403.714	86.8416	22.54	2	-1	1	230.443	49.1357	1.82297	2		-1	-1	0	0	-1	-1	-1	-1	-1	-1	-1
413.326	85.8472	22.54	2	-1	1	239.984	49.6349	1.84163	2		-1	-1	0	0	-1	-1	-1	-1	-1	-1	-1
419.624	84.5214	22.54	2	-1	1	246.234	50.1423	1.8671	2		-1	-1	0	0	-1	-1	-1	-1	-1	-1	-1
443.157	83.8585	22.54	2	-1	1	269.649	51.065	1.8808	2		-1	-1	0	0	-1	-1	-1	-1	-1	-1	-1
457.41	85.8472	22.54	2	-1	1	283.911	51.0449	1.84565	2		-1	-1	0	0	-1	-1	-1	-1	-1	-1	-1
469.674	86.5101	22.54	2	-1	1	296.195	51.297	1.83648	2		-1	-1	0	0	-1	-1	-1	-1	-1	-1	-1
479.286	86.1787	22.54	2	-1	1	305.817	51.6822	1.84606	2		-1	-1	0	0	-1	-1	-1	-1	-1	-1	-1
488.235	86.1787	22.54	2	-1	1	314.792	51.9676	1.84955	2		-1	-1	0	0	-1	-1	-1	-1	-1	-1	-1
499.505	87.1731	22.54	2	-1	1	326.136	52.0914	1.83594	2		-1	-1	0	0	-1	-1	-1	-1	-1	-1	-1
348.361	86.8416	22.54	2	-1	1	175.717	47.8506	1.84353	2		-1	-1	0	0	-1	-1	-1	-1	-1	-1	-1
339.743	87.5045	22.54	2	-1	1	167.207	47.5738	1.83549	2		-1	-1	0	0	-1	-1	-1	-1	-1	-1	-1
329.799	86.1787	22.54	2	-1	1	157.456	47.7706	1.86954	2		-1	-1	0	0	-1	-1	-1	-1	-1	-1	-1
324.164	86.5101	22.54	2	-1	1	151.901	47.6383	1.86716	2		-1	-1	0	0	-1	-1	-1	-1	-1	-1	-1
314.552	86.8416	22.54	2	-1	1	142.434	47.4952	1.86833	2		-1	-1	0	0	-1	-1	-1	-1	-1	-1	-1
309.58	87.5045	22.54	2	-1	1	137.518	47.3115	1.85916	2		-1	-1	0	0	-1	-1	-1	-1	-1	-1	-1
302.288	88.1674	22.54	2	-1	1	130.319	47.1359	1.85224	2		-1	-1	0	0	-1	-1	-1	-1	-1	-1	-1
294.996	89.4933	22.54	2	-1	1	123.087	46.8322	1.83187	2		-1	-1	0	0	-1	-1	-1	-1	-1	-1	-1
286.71	89.4933	22.54	2	-1	1	114.936	46.8465	1.84032	2		-1	-1	0	0	-1	-1	-1	-1	-1	-1	-1
345.046	115.347	25.48	2	-1	1	171.762	46.9761	1.23199	2		-1	-1	0	0	-1	-1	-1	-1	-1	-1	-1
335.103	116.341	25.48	2	-1	1	161.811	47.0565	1.21643	2		-1	-1	0	0	-1	-1	-1	-1	-1	-1	-1
313.889	116.673	25.48	2	-1	1	140.658	46.5621	1.22168	2		-1	-1	0	0	-1	-1	-1	-1	-1	-1	-1
309.58	117.336	25.48	2	-1	1	136.342	46.6956	1.21154	2		-1	-1	0	0	-1	-1	-1	-1	-1	-1	-1
299.637	116.341	25.48	2	-1	1	126.491	46.0429	1.23888	2		-1	-1	0	0	-1	-1	-1	-1	-1	-1	-1
292.676	115.347	25.48	2	-1	1	119.619	45.5104	1.26514	2		-1	-1	0	0	-1	-1	-1	-1	-1	-1	-1
375.54	114.684	25.48	2	-1	1	202.259	47.6462	1.23886	2		-1	-1	0	0	-1	-1	-1	-1	-1	-1	-1
381.506	114.684	25.48	2	-1	1	208.234	47.8232	1.23873	2		-1	-1	0	0	-1	-1	-1	-1	-1	-1	-1
353.996	117.004	24.5	2	-1	1	180.638	48.7893	1.20531	2		-1	-1	0	0	2	-1	-1	-1	-1	-1	-1
359.299	116.673	24.5	2	-1	1	185.948	48.8194	1.21041	2		-1	-1	0	0	2	-1	-1	-1	-1	-1	-1
365.597	116.01	24.5	2	-1	1	192.26	48.7529	1.2219	2		-1	-1	0	0	2	-1	-1	-1	-1	-1	-1
369.905	115.678	24.5	2	-1	1	196.578	48.7567	1.22769	2		-1	-1	0	0	2	-1	-1	-1	-1	-1	-1
399.405	102.752	25.48	2	-1	1	226.214	45.3656	1.48777	2		-1	-1	1	0	-1	-1	-1	-1	-1	-1	-1
393.107	53.3645	24.5	1	-1	1	220.156	63.2952	2.37595	2		-1	-1	0	0	-1	-1	-1	-1	-1	-1	-1
424.264	54.0274	24.5	1	-1	1	250.675	63.5488	2.35894	2		-1	-1	0	0	-1	-1	-1	-1	-1	-1	-1
418.298	50.3814	24.5	1	-1	1	244.798	65.9188	2.40103	2		-1	-1	0	0	-1	-1	-1	-1	-1	-1	-1
471.994	47.7297	24.5	1	-1	1	297.654	69.5031	2.42001	2		-1	-1	0	0	-1	-1	-1	-1	-1	-1	-1
501.162	53.696	24.5	1	-1	1	326.812	66.432	2.35785	2		-1	-1	0	0	-1	-1	-1	-1	-1	-1	-1
445.478	51.0443	26.46	1	-1	1	271.576	64.8512	2.40939	2		-1	-1	0	0	-1	-1	-1	-1	-1	-1	-1
450.118	43.0893	30.38	1	-1	1	276.134	68.4451	2.5313	2		-1	-1	0	0	-1	-1	-1	-1	-1	-1	-1
428.242	44.4152	30.38	1	-1	1	254.674	66.7649	2.52437	2		-1	-1	0	0	-1	-1	-1	-1	-1	-1	-1
403.051	43.4208	30.38	1	-1	1	230.056	67.0094	2.54132	2		-1	-1	0	0	-1	-1	-1	-1	-1	-1	-1
393.107	47.3983	30.38	1	-1	1	220.352	63.7124	2.50772	2		-1	-1	0	0	-1	-1	-1	-1	-1	-1	-1
384.158	40.7692	30.38	1	-1	1	211.692	68.908	2.57139	2		-1	-1	0	0	-1	-1	-1	-1	-1	-1	-1
372.557	46.4039	30.38	1	-1	1	200.361	64.2928	2.52604	2		-1	-1	0	0	-1	-1	-1	-1	-1	-1	-1
356.647	43.4208	30.38	1	-1	1	184.969	66.6643	2.56056	2		-1	-1	0	0	-1	-1	-1	-1	-1	-1	-1
352.007	47.7297	29.0096	1	-1	1	180.345	64.0822	2.50618	2		-1	-1	0	0	-1	-1	-1	-1	-1	-1	-1
395.428	145.509	30.38	1	-1	1	222.201	62.8342	0.733129	2		-1	-1	0	0	-1	-1	-1	-1	-1	-1	-1
381.175	145.178	30.38	1	-1	1	207.709	62.2386	0.732594	2		-1	-1	0	0	-1	-1	-1	-1	-1	-1	-1
367.254	145.178	30.38	1	-1	1	193.571	61.8542	0.729977	2		-1	-1	0	0	-1	-1	-1	-1	-1	-1	-1
355.653	146.504	30.38	1	-1	1	181.775	62.5291	0.715351	2		-1	-1	0	0	-1	-1	-1	-1	-1	-1	-1
446.14	152.47	30.38	1	-1	1	273.966	68.9936	0.689114	2		-1	-1	0	0	-1	-1	-1	-1	-1	-1	-1
474.314	155.122	30.38	1	-1	1	302.781	71.1323	0.680898	2		-1	-1	0	0	-1	-1	-1	-1	-1	-1	-1
503.151	155.122	30.38	1	-1	1	332.16	70.9117	0.696275	2		-1	-1	0	0	-1	-1	-1	-1	-1	-1	-1
529.668	156.116	30.38	1	-1	1	359.141	71.3179	0.701844	2		-1	-1	0	0	-1	-1	-1	-1	-1	-1	-1
558.173	163.74	30.38	1	-1	1	388.338	76.849	0.654552	2		-1	-1	0	0	-1	-1	-1	-1	-1	-1	-1
622.807	162.414	30.38	1	-1	1	453.564	73.8883	0.690616	2		-1	-1	0	0	-1	-1	-1	-1	-1	-1	-1
646.009	39.1119	30.38	1	-1	1	471.691	79.0027	2.58509	2		-1	-1	0	0	-1	-1	-1	-1	-1	-1	-1
463.708	39.4433	36.26	1	-1	1	289.614	68.545	2.62964	2		-1	-1	0	0	-1	-1	-1	-1	-1	-1	-1
508.123	37.4546	36.26	1	-1	1	333.506	71.8708	2.6394	2		-1	-1	0	0	-1	-1	-1	-1	-1	-1	-1
433.877	39.1119	36.26	1	-1	1	260.314	67.9457	2.63938	2		-1	-1	0	0	-1	-1	-1	-1	-1	-1	-1
420.287	38.7804	36.26	1	-1	1	247.028	67.9145	2.64614	2		-1	-1	0	0	-1	-1	-1	-1	-1	-1	-1
391.45	37.786	36.26	1	-1	1	218.956	68.3315	2.6641	2		-1	-1	0	0	-1	-1	-1	-1	-1	-1	-1
408.023	38.449	36.26	1	-1	1	235.07	67.9715	2.65289	2		-1	-1	0	0	-1	-1	-1	-1	-1	-1	-1
378.523	39.1119	36.26	1	-1	1	206.398	67.0966	2.65965	2		-1	-1	0	0	-1	-1	-1	-1	-1	-1	-1
417.635	157.442	51.8801	1	-1	1	245.545	63.3512	0.350609	2		-1	-1	0	0	-1	-1	-1	-1	-1	-1	-1
417.635	153.796	44.2566	1	-1	1	245.287	62.7422	0.48433	2		-1	-1	0	0	-1	-1	-1	-1	-1	-1	-1
417.635	152.47	35.9702	1	-1	1	245.023	65.5766	0.607481	2		-1	-1	0	0	-1	-1	-1	-1	-1	-1	-1
402.057	150.813	36.26	1	-1	1	229.119	63.798	0.611013	2		-1	-1	0	0	-1	-1	-1	-1	-1	-1	-1
390.124	149.818	36.26	1	-1	1	216.948	62.7333	0.61524	2		-1	-1	0	0	-1	-1	-1	-1	-1	-1	-1
375.209	151.807	36.26	1	-1	1	201.717	64.0701	0.594249	2		-1	-1	0	0	-1	-1	-1	-1	-1	-1	-1
474.977	154.459	36.26	1	-1	1	303.603	67.234	0.616876	2		-1	-1	0	0	-1	-1	-1	-1	-1	-1	-1
492.876	157.442	36.26	1	-1	1	321.919	69.5838	0.603208	2		-1	-1	0	0	-1	-1	-1	-1	-1	-1	-1
596.29	168.711	36.26	1	-1	1	427.122	76.7505	0.570055	2		-1	-1	0	0	-1	-1	-1	-1	-1	-1	-1
586.347	170.037	39.2	1	-1	1	417.167	76.8182	0.524823	2		-1	-1	0	0	-1	-1	-1	-1	-1	-1	-1
857.809	121.313	8.82	1	-1	1	688.5	62.9539	1.47714	2		-1	-1	0	0	-1	-1	-1	-1	-1	-1	-1
823.338	131.257	8.82	1	-1	1	654.233	66.3387	1.31153	2		-1	-1	0	0	-1	-1	-1	-1	-1	-1	-1
804.776	113.358	8.82	1	-1	1	634.917	63.861	1.57414	2		-1	-1	0	0	-1	-1	-1	-1	-1	-1	-1
769.311	125.953	8.82	1	-1	1	599.724	66.6741	1.36419	2		-1	-1	0	0	-1	-1	-1	-1	-1	-1	-1
765.333	119.987	8.82	1	-1	1	595.49	65.5625	1.45049	2		-1	-1	0	0	-1	-1	-1	-1	-1	-1	-1
756.052	140.206	8.82	1	-1	1	586.944	71.993	1.16501	2		-1	-1	0	0	-1	-1	-1	-1	-1	-1	-1
762.35	148.161	8.82	1	-1	1	593.588	75.5477	1.07222	2		-1	-1	0	0	-1	-1	-1	-1	-1	-1	-1
699.705	142.526	8.82	1	-1	1	530.315	74.8535	1.11481	2		-1	-1	0	0	-1	-1	-1	-1	-1	-1	-1
696.059	128.274	8.82	1	-1	1	526.049	69.2649	1.29476	2		-1	-1	0	0	-1	-1	-1	-1	-1	-1	-1
698.047	121.313	8.82	1	-1	1	527.765	67.3685	1.39402	2		-1	-1	0	0	-1	-1	-1	-1	-1	-1	-1
700.699	114.021	8.82	1	-1	1	530.137	66.1213	1.5033	2		-1	-1	0	0	-1	-1	-1	-1	-1	-1	-1
682.8	100.763	8.82	1	-1	1	511.525	66.1039	1.69267	2		-1	-1	0	0	-1	-1	-1	-1	-1	-1	-1
705.339	67.6171	8.82	1	-1	1	532.898	76.5068	2.15245	2		-1	-1	0	0	-1	-1	-1	-1	-1	-1	-1
678.16	132.914	8.82	1	-1	1	508.192	71.2933	1.22376	2		-1	-1	0	0	-1	-1	-1	-1	-1	-1	-1
632.088	136.56	9.8	1	-1	1	461.825	72.902	1.14874	2		-1	-1	0	0	-1	-1	-1	-1	-1	-1	-1
629.436	129.599	9.8	1	-1	1	458.848	70.0998	1.23608	2		-1	-1	0	0	-1	-1	-1	-1	-1	-1	-1
637.059	113.69	9.8	1	-1	1	465.874	65.859	1.46696	2		-1	-1	0	0	-1	-1	-1	-1	-1	-1	-1
618.829	116.01	9.8	1	-1	1	447.546	66.3751	1.42086	2		-1	-1	0	0	-1	-1	-1	-1	-1	-1	-1
602.919	123.965	9.8	1	-1	1	431.791	68.5011	1.29692	2		-1	-1	0	0	-1	-1	-1	-1	-1	-1	-1
572.425	134.571	9.8	1	-1	1	401.351	72.8629	1.14061	2		-1	-1	0	0	-1	-1	-1	-1	-1	-1	-1
569.774	125.953	9.8	1	-1	1	398.311	69.371	1.24968	2		-1	-1	0	0	-1	-1	-1	-1	-1	-1	-1
572.757	115.678	9.8	1	-1	1	400.913	66.4133	1.39647	2		-1	-1	0	0	-1	-1	-1	-1	-1	-1	-1
579.055	110.706	9.8	1	-1	1	407.084	65.5472	1.47457	2		-1	-1	0	0	-1	-1	-1	-1	-1	-1	-1
595.296	94.7966	9.8	1	-1	1	422.851	65.4664	1.7281	2		-1	-1	0	0	-1	-1	-1	-1	-1	-1	-1
597.948	87.1731	9.8	1	-1	1	425.212	66.8055	1.84319	2		-1	-1	0	0	-1	-1	-1	-1	-1	-1	-1
621.481	90.4876	9.8	1	-1	1	449.141	66.4045	1.8089	2		-1	-1	0	0	-1	-1	-1	-1	-1	-1	-1
604.577	76.8979	9.8	1	-1	1	431.479	69.9932	1.99024	2		-1	-1	0	0	-1	-1	-1	-1	-1	-1	-1
579.717	80.5439	9.8	1	-1	1	406.511	68.2438	1.92745	2		-1	-1	0	0	-1	-1	-1	-1	-1	-1	-1
592.313	63.6397	9.8	1	-1	1	418.533	75.5442	2.14794	2		-1	-1	0	0	-1	-1	-1	-1	-1	-1	-1
583.363	58.3363	9.8	1	-1	1	409.278	78.1089	2.20274	2		-1	-1	0	0	-1	-1	-1	-1	-1	-1	-1
632.088	51.7072	9.8	1	-1	1	458.207	83.4017	2.28781	2		-1	-1	0	0	-1	-1	-1	-1	-1	-1	-1
694.07	57.0105	13.72	1	-1	1	521.023	78.4037	2.29494	2		-1	-1	0	0	-1	-1	-1	-1	-1	-1	-1
632.75	51.3758	13.72	1	-1	1	458.863	80.6098	2.32164	2		-1	-1	0	0	-1	-1	-1	-1	-1	-1	-1
592.976	62.6453	13.72	1	-1	1	419.189	72.7516	2.18743	2		-1	-1	0	0	-1	-1	-1	-1	-1	-1	-1
584.026	58.6678	13.72	1	-1	1	409.996	74.711	2.22847	2		-1	-1	0	0	-1	-1	-1	-1	-1	-1	-1
592.313	150.481	14.7	1	-1	1	422.203	77.1211	0.937333	2		-1	-1	0	0	-1	-1	-1	-1	-1	-1	-1
569.442	127.279	14.7	1	-1	1	398.085	65.3348	1.20382	2		-1	-1	0	0	-1	-1	-1	-1	-1	-1	-1
702.025	114.021	22.54	2	-1	1	531.313	52.4859	1.47534	2		-1	-1	0	0	-1	-1	-1	-1	-1	-1	-1
715.615	114.021	22.54	2	-1	1	544.988	52.2422	1.48545	2		-1	-1	0	0	-1	-1	-1	-1	-1	-1	-1
731.193	114.021	22.54	2	-1	1	560.658	51.9388	1.49694	2		-1	-1	0	0	-1	-1	-1	-1	-1	-1	-1
744.451	114.352	22.54	2	-1	1	574.003	51.6978	1.50025	2		-1	-1	0	0	-1	-1	-1	-1	-1	-1	-1
766.99	116.673	22.54	2	-1	1	596.749	51.4593	1.47162	2		-1	-1	0	0	-1	-1	-1	-1	-1	-1	-1
713.626	101.426	18.62	2	-1	1	542.523	56.0617	1.71776	2		-1	-1	0	0	-1	-1	-1	-1	-1	-1	-1
691.418	103.083	18.62	2	-1	1	520.22	56.112	1.67168	2		-1	-1	0	0	-1	-1	-1	-1	-1	-1	-1
673.851	104.077	18.62	2	-1	1	502.557	56.1911	1.64083	2		-1	-1	0	0	-1	-1	-1	-1	-1	-1	-1
658.273	103.083	18.62	2	-1	1	486.809	56.2955	1.64675	2		-1	-1	0	0	-1	-1	-1	-1	-1	-1	-1
747.766	103.414	18.62	2	-1	1	576.972	55.4715	1.7078	2		-1	-1	0	0	-1	-1	-1	-1	-1	-1	-1
787.541	107.723	18.62	2	-1	1	617.143	54.4751	1.65869	2		-1	-1	0	0	-1	-1	-1	-1	-1	-1	-1
829.967	108.718	18.62	2	-1	1	659.81	53.4505	1.67038	2		-1	-1	0	0	-1	-1	-1	-1	-1	-1	-1
874.714	108.718	18.62	2	-1	1	704.677	52.2689	1.70185	2		-1	-1	0	0	-1	-1	-1	-1	-1	-1	-1
816.046	95.7909	18.62	2	-1	1	645.35	55.9062	1.89351	2		-1	-1	0	0	-1	-1	-1	-1	-1	-1	-1
773.288	93.8022	18.62	2	-1	1	602.275	56.9697	1.89498	2		-1	-1	0	0	-1	-1	-1	-1	-1	-1	-1
739.479	89.8247	18.62	2	-1	1	568.089	58.3655	1.93545	2		-1	-1	0	0	-1	-1	-1	-1	-1	-1	-1
701.693	86.5101	18.62	2	-1	1	529.886	59.455	1.96087	2		-1	-1	0	0	-1	-1	-1	-1	-1	-1	-1
815.383	82.8641	21.56	2	-1	1	644.132	58.1747	2.12224	2		-1	-1	0	0	-1	-1	-1	-1	-1	-1	-1
784.889	82.8641	21.56	2	-1	1	613.462	58.2718	2.09899	2		-1	-1	0	0	-1	-1	-1	-1	-1	-1	-1
784.889	74.5777	31.6613	2	-1	1	612.921	54.5419	2.32118	2		-1	-1	0	0	-1	-1	-1	-1	-1	-1	-1
809.748	76.8979	31.36	2	-1	1	637.999	53.4318	2.30502	2		-1	-1	0	0	-1	-1	-1	-1	-1	-1	-1
794.501	73.5833	31.36	2	-1	1	622.552	55.4962	2.33881	2		-1	-1	0	0	-1	-1	-1	-1	-1	-1	-1
767.985	71.5946	32.34	2	-1	1	595.796	55.8493	2.35655	2		-1	-1	0	0	-1	-1	-1	-1	-1	-1	-1
750.086	71.2632	32.34	2	-1	1	577.783	55.8538	2.3475	2		-1	-1	0	0	-1	-1	-1	-1	-1	-1	-1
731.856	69.2744	32.34	2	-1	1	559.366	56.931	2.36027	2		-1	-1	0	0	-1	-1	-1	-1	-1	-1	-1
718.598	67.6171	32.34	2	-1	1	545.959	57.8393	2.37215	2		-1	-1	0	0	-1	-1	-1	-1	-1	-1	-1
698.71	65.9598	32.34	2	-1	1	525.876	58.5986	2.37962	2		-1	-1	0	0	-1	-1	-1	-1	-1	-1	-1
685.784	65.2969	32.34	2	-1	1	512.837	58.7793	2.37962	2		-1	-1	0	0	-1	-1	-1	-1	-1	-1	-1
893.938	74.2463	33.32	2	-1	1	722.248	54.1305	2.43679	2		-1	-1	0	0	2	-1	-1	-1	-1	-1	-1
863.113	75.2406	33.32	2	-1	1	691.484	53.2926	2.39779	2		-1	-1	0	0	3	-1	-1	-1	-1	-1	-1
831.624	77.8923	33.32	2	-1	1	659.96	51.3791	2.33349	2		-1	-1	0	0	3	-1	-1	-1	-1	-1	-1
791.518	158.105	33.32	2	-1	1	622.702	62.0605	0.734909	2		-1	-1	0	0	2	-1	-1	-1	-1	-1	-1
769.642	159.431	33.32	2	-1	1	600.843	64.0349	0.719175	2		-1	-1	0	0	2	-1	-1	-1	-1	-1	-1
826.984	156.779	33.32	2	-1	1	658.158	59.4773	0.751643	2		-1	-1	0	0	-1	-1	-1	-1	-1	-1	-1
880.68	153.796	33.32	2	-1	1	711.752	54.8076	0.787832	2		-1	-1	0	0	-1	-1	-1	-1	-1	-1	-1
696.059	168.38	66.64	2	-1	1	527.071	62.3334	0.170299	2		-1	-1	0	0	-1	-1	-1	-1	-1	-1	-1
720.255	170.7	66.64	2	-1	1	551.319	63.6168	0.162816	2		-1	-1	0	0	-1	-1	-1	-1	-1	-1	-1
747.766	172.357	66.64	2	-1	1	578.833	64.12	0.154845	2		-1	-1	0	0	-1	-1	-1	-1	-1	-1	-1
780.912	173.02	66.64	2	-1	1	611.914	63.4319	0.145555	2		-1	-1	0	0	2	-1	-1	-1	-1	-1	-1
825.658	175.009	66.64	2	-1	1	656.598	63.6562	0.127996	2		-1	-1	0	0	-1	-1	-1	-1	-1	-1	-1
876.04	174.346	66.64	2	-1	1	706.823	61.1222	0.107722	2		-1	-1	0	0	-1	-1	-1	-1	-1	-1	-1
926.089	169.706	66.64	2	-1	1	756.66	54.6819	0.0878965	2		-1	-1	0	0	-1	-1	-1	-1	-1	-1	-1
903.219	166.06	66.64	3	-1	1	733.688	51.8689	0.10369	2		-1	-1	0	0	2	-1	-1	-1	-1	-1	-1
825.99	145.841	67.62	4	-1	1	655.851	34.5528	0.172115	2		-1	-1	0	0	2	-1	-1	-1	-1	-1	-1
872.394	145.509	67.62	4	-1	1	702.155	32.4508	0.139232	2		-1	-1	0	0	2	-1	-1	-1	-1	-1	-1
850.517	144.184	67.62	4	-1	1	680.269	31.9582	0.16124	2		-1	-1	0	0	2	-1	-1	-1	-1	-1	-1
894.601	141.863	67.62	4	-1	1	724.214	27.997	0.130791	2		-1	-1	0	0	2	-1	-1	-1	-1	-1	-1
735.833	145.178	67.62	4	-1	1	565.831	37.5837	0.214278	2		-1	-1	0	0	-1	-1	-1	-1	-1	-1	-1
744.783	145.509	67.62	4	-1	1	574.78	37.5344	0.210403	2		-1	-1	0	0	-1	-1	-1	-1	-1	-1	-1
754.395	145.841	67.62	4	-1	1	584.39	37.4595	0.206024	2		-1	-1	0	0	-1	-1	-1	-1	-1	-1	-1
764.67	145.841	67.62	4	-1	1	594.648	37.0326	0.20249	2		-1	-1	0	0	-1	-1	-1	-1	-1	-1	-1
775.608	146.504	67.62	4	-1	1	605.592	37.2357	0.195476	2		-1	-1	0	0	-1	-1	-1	-1	-1	-1	-1
786.546	146.835	67.62	4	-1	1	616.522	37.1158	0.189455	2		-1	-1	0	0	-1	-1	-1	-1	-1	-1	-1
799.473	146.504	67.62	4	-1	1	629.412	36.2645	0.184585	2		-1	-1	0	0	-1	-1	-1	-1	-1	-1	-1
810.411	146.504	67.62	4	-1	1	640.328	35.826	0.178795	2		-1	-1	0	0	-1	-1	-1	-1	-1	-1	-1
917.803	143.189	67.62	4	-1	1	747.437	28.4665	0.104714	2		-1	-1	0	0	-1	-1	-1	-1	-1	-1	-1
939.348	140.206	67.62	4	-1	1	768.856	24.7114	0.0879975	2		-1	-1	0	0	-1	-1	-1	-1	-1	-1	-1
859.135	136.229	67.62	5	-1	1	688.593	23.7474	0.192069	2		-1	-1	0	0	-1	-1	-1	-1	-1	-1	-1
896.59	135.234	67.62	5	-1	1	725.971	21.3311	0.155885	2		-1	-1	0	0	-1	-1	-1	-1	-1	-1	-1
926.089	133.577	67.62	5	-1	1	755.383	18.5816	0.124785	2		-1	-1	0	0	-1	-1	-1	-1	-1	-1	-1
832.619	138.217	67.62	5	-1	1	662.193	26.7523	0.203652	2		-1	-1	0	0	-1	-1	-1	-1	-1	-1	-1
795.496	138.549	67.62	5	-1	1	625.144	28.5816	0.226666	2		-1	-1	0	0	-1	-1	-1	-1	-1	-1	-1
772.957	138.217	67.62	5	-1	1	602.627	29.1909	0.240223	2		-1	-1	0	0	-1	-1	-1	-1	-1	-1	-1
751.08	136.56	67.62	5	-1	1	580.717	28.4907	0.260567	2		-1	-1	0	0	-1	-1	-1	-1	-1	-1	-1
727.216	135.897	67.62	5	-1	1	556.853	28.8583	0.271957	2		-1	-1	0	0	-1	-1	-1	-1	-1	-1	-1
711.306	134.903	67.62	5	-1	1	540.918	28.5702	0.282407	2		-1	-1	0	0	-1	-1	-1	-1	-1	-1	-1
697.053	132.583	67.62	5	-1	1	526.581	26.932	0.303899	2		-1	-1	0	0	-1	-1	-1	-1	-1	-1	-1
681.806	132.251	67.62	5	-1	1	511.328	27.26	0.30637	2		-1	-1	0	0	-1	-1	-1	-1	-1	-1	-1
835.602	94.4651	66.64	5	-1	1	663.633	18.1909	2.89326	2		-1	-1	0	0	-1	-1	-1	-1	-1	-1	-1
813.063	93.8022	66.64	5	-1	1	641.063	18.2223	2.8596	2		-1	-1	0	0	-1	-1	-1	-1	-1	-1	-1
796.821	93.1393	66.64	5	-1	1	624.79	18.408	2.84027	2		-1	-1	0	0	-1	-1	-1	-1	-1	-1	-1
782.9	92.1449	66.64	5	-1	1	610.825	18.9554	2.83288	2		-1	-1	0	0	-1	-1	-1	-1	-1	-1	-1
768.648	91.482	66.64	5	-1	1	596.539	19.1689	2.82022	2		-1	-1	0	0	-1	-1	-1	-1	-1	-1	-1
747.434	91.482	66.64	5	-1	1	575.313	18.5491	2.78404	2		-1	-1	0	0	-1	-1	-1	-1	-1	-1	-1
729.536	90.1562	66.64	5	-1	1	557.349	19.2275	2.78227	2		-1	-1	0	0	-1	-1	-1	-1	-1	-1	-1
710.311	87.5045	66.64	5	-1	1	538.002	21.0601	2.80522	2		-1	-1	0	0	-1	-1	-1	-1	-1	-1	-1
693.738	86.8416	66.64	5	-1	1	521.389	21.114	2.79654	2		-1	-1	0	0	-1	-1	-1	-1	-1	-1	-1
856.815	94.1336	66.64	5	-1	1	684.839	19.0742	2.93981	2		-1	-1	0	0	-1	-1	-1	-1	-1	-1	-1
882.669	92.8078	66.64	5	-1	1	710.629	21.0796	3.00094	2		-1	-1	0	0	-1	-1	-1	-1	-1	-1	-1
922.775	92.8078	66.64	5	-1	1	750.693	22.2685	3.06556	2		-1	-1	0	0	-1	-1	-1	-1	-1	-1	-1
956.252	92.4764	66.64	5	-1	1	784.124	23.6559	3.11526	2		-1	-1	0	0	-1	-1	-1	-1	-1	-1	-1
659.93	77.2294	62.72	4	-1	1	487.169	30.2896	2.7711	2		-1	-1	0	0	-1	-1	-1	-1	-1	-1	-1
665.565	78.2237	62.72	4	-1	1	492.854	29.5855	2.76176	2		-1	-1	0	0	-1	-1	-1	-1	-1	-1	-1
672.194	78.5552	62.72	4	-1	1	499.507	29.5195	2.76232	2		-1	-1	0	0	-1	-1	-1	-1	-1	-1	-1
680.48	79.5496	62.72	4	-1	1	507.848	28.9038	2.75513	2		-1	-1	0	0	-1	-1	-1	-1	-1	-1	-1
688.435	79.2181	62.72	4	-1	1	515.801	29.4785	2.76662	2		-1	-1	0	0	-1	-1	-1	-1	-1	-1	-1
696.722	80.5439	62.72	4	-1	1	524.156	28.5489	2.75535	2		-1	-1	0	0	-1	-1	-1	-1	-1	-1	-1
704.014	80.8754	62.72	4	-1	1	531.473	28.4867	2.75751	2		-1	-1	0	0	-1	-1	-1	-1	-1	-1	-1
711.637	81.5383	62.72	4	-1	1	539.136	28.129	2.75539	2		-1	-1	0	0	-1	-1	-1	-1	-1	-1	-1
731.193	75.2406	62.72	4	-1	1	558.469	34.6053	2.84783	2		-1	-1	0	0	-1	-1	-1	-1	-1	-1	-1
693.076	73.5833	62.72	4	-1	1	520.216	34.8653	2.83553	2		-1	-1	0	0	-1	-1	-1	-1	-1	-1	-1
679.486	72.9204	62.72	4	-1	1	506.575	34.9995	2.83319	2		-1	-1	0	0	-1	-1	-1	-1	-1	-1	-1
784.226	86.5101	63.7	4	-1	1	612.002	25.305	2.8021	2		-1	-1	0	0	-1	-1	-1	-1	-1	-1	-1
814.057	87.5045	63.7	4	-1	1	641.9	25.1644	2.82999	2		-1	-1	0	0	-1	-1	-1	-1	-1	-1	-1
827.647	88.1674	63.7	4	-1	1	655.526	24.8867	2.84099	2		-1	-1	0	0	-1	-1	-1	-1	-1	-1	-1
841.9	88.4989	63.7	4	-1	1	669.802	24.9285	2.85815	2		-1	-1	0	0	-1	-1	-1	-1	-1	-1	-1
771.299	79.2181	63.7	4	-1	1	598.779	31.7919	2.87363	2		-1	-1	0	0	-1	-1	-1	-1	-1	-1	-1
[truncated: 1,220 more rows]

## Sheet: 12h
x (micron)	y (micron)	z (micron)	label	predicted label	manual	distance from QC (z) (micron)	radial distance (r) (micron)	phi (radians)	radius (micron)	coefficients	subtype	predicted subtype	mitotic	predicted mitotic	cellfile	predicted cellfile	value	confidence	sphase	distance from border (micron)	volume (cube microns)
43.8281	80.625	74.48	1	-1	1	2.27213e-11	4.62611	1.67669	1.85938		-1	-1	0	0	2	-1	-1	-1	-1	-1	-1
48.5156	81.3281	76.385	1	-1	1	4.64843	2.58869	1.50882	1.85938		-1	-1	0	0	2	-1	-1	-1	-1	-1	-1
61.875	64.9219	78.4944	1	-1	1	16.4923	16.8826	-2.96927	1.85938		-1	-1	0	0	2	-1	-1	-1	-1	-1	-1
47.1094	93.75	72.1662	1	-1	1	4.45858	14.7199	0.643981	1.85938		-1	-1	0	0	2	-1	-1	-1	-1	-1	-1
60.7031	106.406	70.5256	1	-1	1	19.1184	25.7625	0.475239	1.85938		-1	-1	0	0	2	-1	-1	-1	-1	-1	-1
70.7813	112.969	74.3325	1	-1	1	29.5465	30.4596	0.285215	1.85938		-1	-1	0	0	2	-1	-1	-1	-1	-1	-1
90.4688	44.5313	73.5	1	-1	1	43.5546	39.7771	-3.06999	1.85938		-1	-1	0	0	2	-1	-1	-1	-1	-1	-1
101.953	47.1094	49.98	1	-1	1	57.3062	46.3345	2.69308	1.85938		-1	-1	0	0	2	-1	-1	-1	-1	-1	-1
127.031	47.5781	46.6194	1	-1	1	84.8559	47.7226	2.67042	1.85938		-1	-1	0	0	2	-1	-1	-1	-1	-1	-1
143.906	47.1094	47.5569	1	-1	1	102.591	46.8622	2.71734	1.85938		-1	-1	0	0	2	-1	-1	-1	-1	-1	-1
67.7344	62.8125	48.26	1	-1	1	23.3807	35.6889	2.31437	1.85938		-1	-1	0	0	2	-1	-1	-1	-1	-1	-1
24.8438	75.9375	49.98	1	-1	1	-18.2967	30.0152	1.83001	1.85938		-1	-1	0	0	2	-1	-1	-1	-1	-1	-1
40.0781	97.2656	49.98	1	-1	1	-1.34511	33.8689	1.20519	1.85938		-1	-1	0	0	2	-1	-1	-1	-1	-1	-1
58.125	114.141	49.98	1	-1	1	18.0345	43.1456	0.885457	1.85938		-1	-1	0	0	2	-1	-1	-1	-1	-1	-1
77.1094	110.391	49.98	1	-1	1	36.623	38.7497	0.961099	1.85938		-1	-1	0	0	2	-1	-1	-1	-1	-1	-1
59.5313	101.484	53.4162	1	-1	1	18.2366	31.8243	1.0678	1.85938		-1	-1	0	0	2	-1	-1	-1	-1	-1	-1
60.4688	91.6406	53.4162	1	-1	1	18.347	26.8292	1.36027	1.85938		-1	-1	0	0	2	-1	-1	-1	-1	-1	-1
180	102.188	22.4787	1	-1	1	139.523	50.7365	1.40297	1.85938		-1	-1	0	0	2	-1	-1	-1	-1	-1	-1
180	97.0313	21.3069	1	-1	1	139.65	50.4514	1.50735	1.85938		-1	-1	0	0	2	-1	-1	-1	-1	-1	-1
90.2344	103.828	37.24	1	-1	1	49.7478	44.3777	1.28052	1.85938		-1	-1	0	0	2	-1	-1	-1	-1	-1	-1
77.3438	103.359	37.24	1	-1	1	36.7871	45.1265	1.27448	1.85938		-1	-1	0	0	2	-1	-1	-1	-1	-1	-1
67.0313	102.891	37.24	1	-1	1	26.4801	45.6792	1.27083	1.85938		-1	-1	0	0	2	-1	-1	-1	-1	-1	-1
80.3906	98.2031	37.24	1	-1	1	39.3897	42.8935	1.38595	1.85938		-1	-1	0	0	2	-1	-1	-1	-1	-1	-1
52.9688	83.8281	39.7444	1	-1	1	10.7828	39.0367	1.66703	1.85938		-1	-1	0	0	2	-1	-1	-1	-1	-1	-1
75.7031	69.7656	35.5256	1	-1	1	32.4147	44.3003	2.03947	1.85938		-1	-1	0	0	2	-1	-1	-1	-1	-1	-1
96.7969	57.5781	38.885	1	-1	1	53.099	46.6872	2.35515	1.85938		-1	-1	0	0	2	-1	-1	-1	-1	-1	-1
110.391	57.4219	37.24	1	-1	1	67.9218	47.9138	2.36055	1.85938		-1	-1	0	0	2	-1	-1	-1	-1	-1	-1
213.516	64.4531	11.76	1	-1	1	172.098	60.7895	2.09109	1.85938		-1	-1	0	0	2	-1	-1	-1	-1	-1	-1
173.906	57.1875	17.64	1	-1	1	134.493	60.484	2.22493	1.85938		-1	-1	0	0	2	-1	-1	-1	-1	-1	-1
186.797	84.8438	20.58	1	-1	1	146.324	49.4801	1.75011	1.85938		-1	-1	0	0	2	-1	-1	-1	-1	-1	-1
187.734	91.6406	20.58	1	-1	1	147.178	49.7677	1.61309	1.85938		-1	-1	0	0	2	-1	-1	-1	-1	-1	-1
172.266	85.3125	20.58	1	-1	1	132.391	50.4511	1.74288	1.85938		-1	-1	0	0	2	-1	-1	-1	-1	-1	-1
161.953	84.1406	20.58	1	-1	1	122.461	51.2669	1.76786	1.85938		-1	-1	0	0	2	-1	-1	-1	-1	-1	-1
199.688	120.938	23.52	1	-1	1	158.529	57.8049	1.07605	1.85938		-1	-1	0	0	2	-1	-1	-1	-1	-1	-1
211.172	121.172	23.52	1	-1	1	169.841	57.5023	1.06778	1.85938		-1	-1	0	0	2	-1	-1	-1	-1	-1	-1
235.547	124.219	23.52	1	-1	1	194.05	58.5769	1.02359	1.85938		-1	-1	0	0	2	-1	-1	-1	-1	-1	-1
153.75	101.016	27.1662	1	-1	1	113.752	47.7236	1.41404	1.85938		-1	-1	0	0	2	-1	-1	-1	-1	-1	-1
139.219	85.3125	25.48	1	-1	1	99.6469	48.2526	1.74983	1.85938		-1	-1	0	0	2	-1	-1	-1	-1	-1	-1
91.1719	81.4844	32.4787	1	-1	1	49.2631	44.7237	1.79917	1.85938		-1	-1	0	0	2	-1	-1	-1	-1	-1	-1
106.875	80.1563	30.38	1	-1	1	65.7744	46.1452	1.84737	1.85938		-1	-1	0	0	2	-1	-1	-1	-1	-1	-1
117.656	89.7656	31.385	1	-1	1	77.2896	44.2616	1.64432	1.85938		-1	-1	0	0	2	-1	-1	-1	-1	-1	-1
102.656	89.2969	33.32	1	-1	1	61.6807	43.3562	1.63848	1.85938		-1	-1	0	0	2	-1	-1	-1	-1	-1	-1
108.281	105.234	33.32	1	-1	1	68.215	47.1235	1.30099	1.85938		-1	-1	0	0	2	-1	-1	-1	-1	-1	-1
91.875	93.6719	35.0569	1	-1	1	50.7768	42.9981	1.51847	1.85938		-1	-1	0	0	2	-1	-1	-1	-1	-1	-1
80.8594	93.5156	33.32	1	-1	1	39.6241	45.3198	1.51342	1.85938		-1	-1	0	0	2	-1	-1	-1	-1	-1	-1
124.688	103.828	44.1	2	-1	1	83.7433	35.6279	1.20938	1.85938		-1	-1	0	0	2	-1	-1	-1	-1	-1	-1
118.828	104.531	44.1	2	-1	1	77.9546	36.4402	1.19543	1.85938		-1	-1	0	0	2	-1	-1	-1	-1	-1	-1
113.438	103.594	44.1	2	-1	1	72.5683	36.396	1.21885	1.85938		-1	-1	0	0	2	-1	-1	-1	-1	-1	-1
107.813	102.422	44.1	2	-1	1	66.9094	36.2805	1.24648	1.85938		-1	-1	0	0	2	-1	-1	-1	-1	-1	-1
102.422	102.891	44.1	2	-1	1	61.5447	36.9266	1.23298	1.85938		-1	-1	0	0	2	-1	-1	-1	-1	-1	-1
112.5	93.0469	42.8694	2	-1	1	71.3063	33.814	1.51259	1.85938		-1	-1	0	0	2	-1	-1	-1	-1	-1	-1
112.5	85.7813	39.3537	2	-1	1	71.2616	36.5117	1.72957	1.85938		-1	-1	0	0	2	-1	-1	-1	-1	-1	-1
112.5	54.1406	81.5412	2	-1	1	66.9215	31.8942	-2.80425	1.85938		-1	-1	0	0	2	-1	-1	-1	-1	-1	-1
157.734	116.953	51.94	2	-1	1	115.452	36.9507	0.742981	1.85938		-1	-1	0	0	2	-1	-1	-1	-1	-1	-1
162.656	116.719	51.94	2	-1	1	120.276	36.5859	0.736451	1.85938		-1	-1	0	0	2	-1	-1	-1	-1	-1	-1
164.297	52.0313	51.94	2	-1	1	122.736	39.3132	2.77401	1.85938		-1	-1	0	0	2	-1	-1	-1	-1	-1	-1
158.672	52.2656	51.94	2	-1	1	117.148	39.4041	2.76198	1.85938		-1	-1	0	0	2	-1	-1	-1	-1	-1	-1
152.109	52.5	51.94	2	-1	1	110.555	39.5488	2.74807	1.85938		-1	-1	0	0	2	-1	-1	-1	-1	-1	-1
60	65.8594	56.4631	1	-1	1	15.6007	27.0922	2.35954	1.85938		-1	-1	0	0	2	-1	-1	-1	-1	-1	-1
63.5156	71.3281	57.9475	1	-1	1	19.4979	22.9794	2.21815	1.85938		-1	-1	0	0	2	-1	-1	-1	-1	-1	-1
96.0938	52.7344	54.88	1	-1	1	51.1103	38.7772	2.70105	1.85938		-1	-1	0	0	2	-1	-1	-1	-1	-1	-1
136.875	42.6563	54.88	1	-1	1	94.5829	47.5612	2.88752	1.85938		-1	-1	0	0	2	-1	-1	-1	-1	-1	-1
152.578	40.9375	57.5569	1	-1	1	110.661	47.6786	2.97819	1.85938		-1	-1	0	0	2	-1	-1	-1	-1	-1	-1
99.375	43.2813	58.7287	1	-1	1	53.7266	45.2988	2.8961	1.85938		-1	-1	0	0	2	-1	-1	-1	-1	-1	-1
53.9063	48.5156	57.4006	1	-1	1	8.0451	38.9577	2.72794	1.85938		-1	-1	0	0	2	-1	-1	-1	-1	-1	-1
58.5938	108.281	43.12	1	-1	1	18.2905	44.1668	1.09084	1.85938		-1	-1	0	0	2	-1	-1	-1	-1	-1	-1
76.6406	109.688	43.12	1	-1	1	36.3768	43.5145	1.08266	1.85938		-1	-1	0	0	2	-1	-1	-1	-1	-1	-1
83.9063	95.1563	41.4631	1	-1	1	42.4742	37.6978	1.42924	1.85938		-1	-1	0	0	2	-1	-1	-1	-1	-1	-1
83.9063	90.4688	40.5256	1	-1	1	42.1153	37.494	1.55587	1.85938		-1	-1	0	0	2	-1	-1	-1	-1	-1	-1
65.8594	87.8906	43.12	1	-1	1	23.8198	35.4897	1.57584	1.85938		-1	-1	0	0	2	-1	-1	-1	-1	-1	-1
65.8594	68.9063	47.04	1	-1	1	22.073	33.878	2.13847	1.85938		-1	-1	0	0	2	-1	-1	-1	-1	-1	-1
27.1094	78.4375	77.0881	1	-1	1	-16.9354	2.74447	1.92156	1.85938		-1	-1	0	0	2	-1	-1	-1	-1	-1	-1
30	112.969	77.3225	1	-1	1	-11.1797	33.7368	0.23415	1.85938		-1	-1	0	0	2	-1	-1	-1	-1	-1	-1
33.2813	66.3281	52.2444	1	-1	1	-10.7914	30.2859	2.18376	1.85938		-1	-1	0	0	2	-1	-1	-1	-1	-1	-1
43.125	80.1563	60.2131	1	-1	1	-0.158497	18.9035	1.74334	1.85938		-1	-1	0	0	2	-1	-1	-1	-1	-1	-1
43.125	81.5625	67.4787	1	-1	1	-0.33669	11.7076	1.62775	1.85938		-1	-1	0	0	2	-1	-1	-1	-1	-1	-1
41.7188	116.953	78.7287	1	-1	1	0.764147	36.6544	0.177193	1.85938		-1	-1	0	0	2	-1	-1	-1	-1	-1	-1
41.7188	70.7031	77.7131	1	-1	1	-3.0614	9.55446	-3.13193	1.85938		-1	-1	0	0	2	-1	-1	-1	-1	-1	-1
48.2813	100.078	66.0725	1	-1	1	6.40253	23.133	0.752079	1.85938		-1	-1	0	0	2	-1	-1	-1	-1	-1	-1
48.2813	91.6406	66.0725	1	-1	1	5.69708	16.7995	1.03281	1.85938		-1	-1	0	0	2	-1	-1	-1	-1	-1	-1
48.2813	86.9531	89.7444	1	-1	1	4.34154	12.4888	-0.884237	1.85938		-1	-1	0	0	2	-1	-1	-1	-1	-1	-1
48.2813	101.953	85.9944	1	-1	1	5.74832	22.3288	-0.157627	1.85938		-1	-1	0	0	2	-1	-1	-1	-1	-1	-1
50.2031	93.2813	81.0725	1	-1	1	7.13718	12.5611	-0.0137647	1.85938		-1	-1	0	0	2	-1	-1	-1	-1	-1	-1
48.2813	60	70.0569	1	-1	1	2.88946	22.4966	2.90129	1.85938		-1	-1	0	0	2	-1	-1	-1	-1	-1	-1
50.3125	69.0625	82.2444	1	-1	1	5.17348	12.2594	-2.69582	1.85938		-1	-1	0	0	2	-1	-1	-1	-1	-1	-1
55.7813	88.3594	57.4006	1	-1	1	13.2433	22.2937	1.41794	1.85938		-1	-1	0	0	2	-1	-1	-1	-1	-1	-1
57.6563	72.4219	61.1506	1	-1	1	13.625	19.6183	2.21674	1.85938		-1	-1	0	0	2	-1	-1	-1	-1	-1	-1
64.4531	62.8125	60.76	1	-1	1	19.6049	26.0129	2.56806	1.85938		-1	-1	0	0	2	-1	-1	-1	-1	-1	-1
71.4844	58.8281	60.76	1	-1	1	26.2725	29.3777	2.68008	1.85938		-1	-1	0	0	2	-1	-1	-1	-1	-1	-1
63.75	45.9375	61.8537	1	-1	1	17.4494	39.5805	2.87807	1.85938		-1	-1	0	0	2	-1	-1	-1	-1	-1	-1
63.75	46.1719	96.3069	1	-1	1	16.0665	39.9491	-2.51001	1.85938		-1	-1	0	0	2	-1	-1	-1	-1	-1	-1
75.4688	44.2969	61.1506	1	-1	1	29.0088	42.063	2.89907	1.85938		-1	-1	0	0	2	-1	-1	-1	-1	-1	-1
75.4688	43.0469	91.0725	1	-1	1	27.6862	41.9229	-2.65562	1.85938		-1	-1	0	0	2	-1	-1	-1	-1	-1	-1
75.4688	118.125	88.1037	1	-1	1	34.0842	36.5108	-0.121098	1.85938		-1	-1	0	0	2	-1	-1	-1	-1	-1	-1
75.4688	115.781	97.7131	1	-1	1	33.4971	38.2977	-0.381975	1.85938		-1	-1	0	0	2	-1	-1	-1	-1	-1	-1
75.4688	71.25	103.807	1	-1	1	29.5259	28.4589	-1.82913	1.85938		-1	-1	0	0	2	-1	-1	-1	-1	-1	-1
78.1719	104.531	58.8	2	-1	1	36.832	28.3601	0.892034	1.85938		-1	-1	0	0	2	-1	-1	-1	-1	-1	-1
60.2344	99.6094	88.2	1	-1	1	17.3639	20.3476	-0.33613	1.85938		-1	-1	0	0	2	-1	-1	-1	-1	-1	-1
59.0625	71.0156	97.02	1	-1	1	13.4474	21.2992	-1.92427	1.85938		-1	-1	0	0	2	-1	-1	-1	-1	-1	-1
65.625	71.0156	96.0725	1	-1	1	20.02	20.997	-1.96299	1.85938		-1	-1	0	0	2	-1	-1	-1	-1	-1	-1
170.391	38.9063	98	1	-1	1	125.388	54.0644	-2.46626	1.85938		-1	-1	0	0	2	-1	-1	-1	-1	-1	-1
148.828	40.7813	94.1975	1	-1	1	103.596	50.0499	-2.54712	1.85938		-1	-1	0	0	2	-1	-1	-1	-1	-1	-1
182.109	39.1406	100.291	1	-1	1	137.037	55.3599	-2.41331	1.85938		-1	-1	0	0	2	-1	-1	-1	-1	-1	-1
98.6719	47.8125	64.68	1	-1	1	52.9684	38.9079	2.98881	1.85938		-1	-1	0	0	2	-1	-1	-1	-1	-1	-1
80.625	105.234	117.6	1	-1	1	36.9397	45.5541	-0.907617	1.85938		-1	-1	0	0	2	-1	-1	-1	-1	-1	-1
85	97.9688	120.895	1	-1	1	40.5541	45.7207	-1.09116	1.85938		-1	-1	0	0	2	-1	-1	-1	-1	-1	-1
79.2188	91.4063	121.832	1	-1	1	34.2111	44.8967	-1.22471	1.85938		-1	-1	0	0	2	-1	-1	-1	-1	-1	-1
71.25	69.6094	119.56	1	-1	1	24.5469	43.4869	-1.70858	1.85938		-1	-1	0	0	2	-1	-1	-1	-1	-1	-1
79.9219	68.9063	119.56	1	-1	1	33.1225	44.2644	-1.73693	1.85938		-1	-1	0	0	2	-1	-1	-1	-1	-1	-1
113.438	40.5469	119.56	1	-1	1	64.6938	62.5772	-2.20988	1.85938		-1	-1	0	0	2	-1	-1	-1	-1	-1	-1
106.406	98.9063	119.56	1	-1	1	60.8376	45.2767	-1.10107	1.85938		-1	-1	0	0	2	-1	-1	-1	-1	-1	-1
107.813	75	119.56	1	-1	1	60.8995	44.4192	-1.64148	1.85938		-1	-1	0	0	2	-1	-1	-1	-1	-1	-1
182.109	42.1875	119.56	1	-1	1	135.638	65.609	-2.13764	1.85938		-1	-1	0	0	2	-1	-1	-1	-1	-1	-1
169.453	43.5938	119.56	1	-1	1	122.636	64.0746	-2.13313	1.85938		-1	-1	0	0	2	-1	-1	-1	-1	-1	-1
134.531	37.9688	119.56	1	-1	1	86.4634	65.9865	-2.22795	1.85938		-1	-1	0	0	2	-1	-1	-1	-1	-1	-1
105	43.5938	119.56	1	-1	1	56.2362	59.7434	-2.17471	1.85938		-1	-1	0	0	2	-1	-1	-1	-1	-1	-1
157.969	138.047	75.6819	1	-1	1	113.516	52.0449	0.0954776	1.85938		-1	-1	0	0	2	-1	-1	-1	-1	-1	-1
172.031	139.453	61.6194	1	-1	1	128.487	54.3781	0.33657	1.85938		-1	-1	0	0	2	-1	-1	-1	-1	-1	-1
174.141	37.2656	74.48	1	-1	1	130.957	48.7507	-2.91076	1.85938		-1	-1	0	0	2	-1	-1	-1	-1	-1	-1
191.484	142.969	70.56	1	-1	1	147.562	57.2515	0.147846	1.85938		-1	-1	0	0	2	-1	-1	-1	-1	-1	-1
232.734	145.313	79.38	1	-1	1	190.241	60.3608	-0.025958	1.85938		-1	-1	0	0	2	-1	-1	-1	-1	-1	-1
247.031	142.266	83.885	1	-1	1	205.018	58.1516	-0.117337	1.85938		-1	-1	0	0	2	-1	-1	-1	-1	-1	-1
213.984	142.5	88.2	1	-1	1	170.146	60.0108	-0.169095	1.85938		-1	-1	0	0	2	-1	-1	-1	-1	-1	-1
107.813	127.969	88.2	1	-1	1	65.3592	44.2221	-0.111221	1.85938		-1	-1	0	0	2	-1	-1	-1	-1	-1	-1
104.063	129.141	85.5256	1	-1	1	62.1036	44.855	-0.0405902	1.85938		-1	-1	0	0	2	-1	-1	-1	-1	-1	-1
102.656	121.172	85.9944	1	-1	1	60.3585	37.2681	-0.0931869	1.85938		-1	-1	0	0	2	-1	-1	-1	-1	-1	-1
115.078	126.797	66.64	1	-1	1	73.4415	42.0456	0.379519	1.85938		-1	-1	0	0	2	-1	-1	-1	-1	-1	-1
100.547	125.859	66.64	1	-1	1	59.6914	42.0083	0.40317	1.85938		-1	-1	0	0	2	-1	-1	-1	-1	-1	-1
89.0625	126.563	66.64	1	-1	1	48.8616	43.5699	0.409303	1.85938		-1	-1	0	0	2	-1	-1	-1	-1	-1	-1
82.2656	125.859	66.64	1	-1	1	42.3511	43.4819	0.417375	1.85938		-1	-1	0	0	2	-1	-1	-1	-1	-1	-1
124.844	126.016	59.0412	1	-1	1	83.1934	43.0461	0.540763	1.85938		-1	-1	0	0	2	-1	-1	-1	-1	-1	-1
123.281	127.969	83.1819	1	-1	1	80.0148	42.7554	-0.0269638	1.85938		-1	-1	0	0	2	-1	-1	-1	-1	-1	-1
132.656	123.516	51.7756	1	-1	1	91.1722	43.6486	0.70455	1.85938		-1	-1	0	0	2	-1	-1	-1	-1	-1	-1
142.734	124.219	73.5	2	-1	1	99.0792	38.0152	0.162899	1.85938		-1	-1	0	0	2	-1	-1	-1	-1	-1	-1
148.828	124.922	73.5	2	-1	1	104.94	38.7382	0.149447	1.85938		-1	-1	0	0	2	-1	-1	-1	-1	-1	-1
257.813	131.953	71.54	2	-1	1	215.997	45.3636	0.076932	1.85938		-1	-1	0	0	2	-1	-1	-1	-1	-1	-1
262.031	131.953	71.54	2	-1	1	220.329	45.2058	0.0759431	1.85938		-1	-1	0	0	2	-1	-1	-1	-1	-1	-1
267.656	132.422	71.54	2	-1	1	226.119	45.4454	0.0758141	1.85938		-1	-1	0	0	2	-1	-1	-1	-1	-1	-1
271.875	132.188	71.54	2	-1	1	230.432	45.03	0.0747724	1.85938		-1	-1	0	0	2	-1	-1	-1	-1	-1	-1
280.547	131.719	71.54	2	-1	1	239.279	44.1586	0.0730977	1.85938		-1	-1	0	0	2	-1	-1	-1	-1	-1	-1
287.344	133.594	71.54	2	-1	1	246.319	45.6785	0.0767482	1.85938		-1	-1	0	0	2	-1	-1	-1	-1	-1	-1
291.563	135	71.54	2	-1	1	250.703	46.8514	0.0795344	1.85938		-1	-1	0	0	2	-1	-1	-1	-1	-1	-1
299.531	137.578	71.54	2	-1	1	258.982	48.9666	0.0846732	1.85938		-1	-1	0	0	2	-1	-1	-1	-1	-1	-1
306.563	137.578	71.54	2	-1	1	266.149	48.546	0.0855956	1.85938		-1	-1	0	0	2	-1	-1	-1	-1	-1	-1
87.3438	49.6094	80.9944	1	-1	1	40.4687	34.4559	-2.87034	1.90625		-1	-1	0	0	2	-1	-1	-1	-1	-1	-1
90.8594	49.375	87.7912	1	-1	1	43.7407	36.3434	-2.68124	1.90625		-1	-1	0	0	2	-1	-1	-1	-1	-1	-1
52.9688	54.6094	87.1662	1	-1	1	6.40946	27.699	-2.66797	1.90625		-1	-1	0	0	2	-1	-1	-1	-1	-1	-1
52.9688	80.8594	84.5881	1	-1	1	8.70913	5.85902	-1.44892	1.90625		-1	-1	0	0	2	-1	-1	-1	-1	-1	-1
52.9688	88.3594	63.7287	1	-1	1	10.1853	16.6131	1.28727	1.90625		-1	-1	0	0	2	-1	-1	-1	-1	-1	-1
53.9063	65.3125	85.2131	1	-1	1	8.31728	17.0952	-2.58625	1.90625		-1	-1	0	0	2	-1	-1	-1	-1	-1	-1
92.2656	45.625	111.72	1	-1	1	43.8227	51.7689	-2.24698	1.90625		-1	-1	0	0	2	-1	-1	-1	-1	-1	-1
135.391	36.7188	112.7	1	-1	1	87.9205	62.5551	-2.32095	1.90625		-1	-1	0	0	2	-1	-1	-1	-1	-1	-1
105.625	40	113.68	1	-1	1	56.9772	58.4459	-2.28904	1.90625		-1	-1	0	0	2	-1	-1	-1	-1	-1	-1
113.359	38.3594	113.68	1	-1	1	64.8831	60.34	-2.30522	1.90625		-1	-1	0	0	2	-1	-1	-1	-1	-1	-1
64.8438	110.781	113.68	1	-1	1	21.8501	45.5709	-0.726634	1.90625		-1	-1	0	0	2	-1	-1	-1	-1	-1	-1
65.5469	88.5156	110.74	1	-1	1	20.8083	33.1286	-1.21316	1.90625		-1	-1	0	0	2	-1	-1	-1	-1	-1	-1
105.938	98.5938	112.401	1	-1	1	60.7787	38.3922	-1.05204	1.90625		-1	-1	0	0	2	-1	-1	-1	-1	-1	-1
106.875	126.484	94.5881	1	-1	1	64.0559	45.0285	-0.255232	1.90625		-1	-1	0	0	2	-1	-1	-1	-1	-1	-1
93.4375	65.0781	117.6	1	-1	1	46.2863	44.8285	-1.85122	1.90625		-1	-1	0	0	-1	-1	-1	-1	-1	-1	-1
87.5781	61.5625	117.6	1	-1	1	40.2113	45.9894	-1.913	1.90625		-1	-1	0	0	-1	-1	-1	-1	-1	-1	-1
81.7188	61.5625	117.6	1	-1	1	34.3773	45.5442	-1.90615	1.90625		-1	-1	0	0	-1	-1	-1	-1	-1	-1	-1
70.2344	62.7344	117.6	1	-1	1	23.0407	44.1467	-1.86896	1.90625		-1	-1	0	0	-1	-1	-1	-1	-1	-1	-1
63.2031	62.7344	117.6	1	-1	1	16.0399	43.6301	-1.85984	1.90625		-1	-1	0	0	-1	-1	-1	-1	-1	-1	-1
64.6094	69.2969	119.56	1	-1	1	17.909	43.1561	-1.70505	1.90625		-1	-1	0	0	-1	-1	-1	-1	-1	-1	-1
58.2813	68.5938	119.56	1	-1	1	11.5495	42.9598	-1.71063	1.90625		-1	-1	0	0	-1	-1	-1	-1	-1	-1	-1
62.7344	78.6719	119.56	1	-1	1	16.8259	41.3133	-1.48408	1.90625		-1	-1	0	0	-1	-1	-1	-1	-1	-1	-1
57.1094	79.8438	119.56	1	-1	1	11.3233	40.9926	-1.44466	1.90625		-1	-1	0	0	-1	-1	-1	-1	-1	-1	-1
90.625	91.3281	119.56	1	-1	1	45.4761	42.9459	-1.24048	1.90625		-1	-1	0	0	-1	-1	-1	-1	-1	-1	-1
97.8906	91.3281	119.56	1	-1	1	52.3634	43.2005	-1.25381	1.90625		-1	-1	0	0	-1	-1	-1	-1	-1	-1	-1
94.375	97.6563	119.56	1	-1	1	49.4718	44.5204	-1.10702	1.90625		-1	-1	0	0	-1	-1	-1	-1	-1	-1	-1
71.6406	90.625	120.54	1	-1	1	26.6531	43.2955	-1.22134	1.90625		-1	-1	0	0	-1	-1	-1	-1	-1	-1	-1
63.2031	88.9844	120.54	1	-1	1	18.115	42.7922	-1.24122	1.90625		-1	-1	0	0	-1	-1	-1	-1	-1	-1	-1
55	87.8125	120.54	1	-1	1	9.8494	42.3835	-1.25114	1.90625		-1	-1	0	0	-1	-1	-1	-1	-1	-1	-1
107.734	91.7969	120.54	1	-1	1	61.662	44.6863	-1.26189	1.90625		-1	-1	0	0	-1	-1	-1	-1	-1	-1	-1
114.297	92.2656	120.54	1	-1	1	67.9002	45.1152	-1.26003	1.90625		-1	-1	0	0	-1	-1	-1	-1	-1	-1	-1
92.5	72.1094	119.56	1	-1	1	45.8216	44.1188	-1.68688	1.90625		-1	-1	1	0	-1	-1	-1	-1	-1	-1	-1
118.984	72.3438	119.56	1	-1	1	71.6796	45.9419	-1.70521	1.90625		-1	-1	0	0	-1	-1	-1	-1	-1	-1	-1
127.422	89.4531	119.56	1	-1	1	80.3932	44.7007	-1.33228	1.90625		-1	-1	0	0	-1	-1	-1	-1	-1	-1	-1
73.75	98.125	119.56	1	-1	1	29.4203	44.3857	-1.05513	1.90625		-1	-1	0	0	-1	-1	-1	-1	-1	-1	-1
62.5	96.4844	119.56	1	-1	1	18.0818	43.7169	-1.06644	1.90625		-1	-1	0	0	-1	-1	-1	-1	-1	-1	-1
48.25	102.031	119.56	1	-1	1	4.35735	45.8871	-0.923492	1.90625		-1	-1	0	0	-1	-1	-1	-1	-1	-1	-1
60.4375	104.219	119.56	1	-1	1	16.6749	46.8756	-0.906471	1.90625		-1	-1	0	0	-1	-1	-1	-1	-1	-1	-1
92.8125	86.875	34.5881	1	-1	1	51.2682	42.4995	1.67871	1.90625		-1	-1	0	0	-1	-1	-1	-1	-1	-1	-1
92.8125	109.844	43.26	1	-1	1	52.4521	42.1598	1.0914	1.90625		-1	-1	0	0	-1	-1	-1	-1	-1	-1	-1
92.8125	111.25	49.8225	1	-1	1	52.2182	38.1003	0.958269	1.90625		-1	-1	0	0	-1	-1	-1	-1	-1	-1	-1
92.8125	116.406	54.9787	1	-1	1	52.3113	38.7247	0.769133	1.90625		-1	-1	0	0	-1	-1	-1	-1	-1	-1	-1
92.8125	117.109	32.7131	1	-1	1	53.4827	54.9169	1.10094	1.90625		-1	-1	0	0	-1	-1	-1	-1	-1	-1	-1
56.4063	70	69.58	1	-1	1	11.8348	14.5214	2.63682	1.90625		-1	-1	0	0	-1	-1	-1	-1	-1	-1	-1
63.1719	70.4688	69.58	2	-1	1	18.6103	14.4297	2.65611	1.90625		-1	-1	0	0	-1	-1	-1	-1	-1	-1	-1
62.0313	64.375	69.58	1	-1	1	16.9651	19.5488	2.84051	1.90625		-1	-1	0	0	-1	-1	-1	-1	-1	-1	-1
56.1719	62.2656	69.58	1	-1	1	10.9547	21.1034	2.86471	1.90625		-1	-1	0	0	-1	-1	-1	-1	-1	-1	-1
55.9375	77.5	69.58	1	-1	1	11.9951	9.82013	2.13982	1.90625		-1	-1	0	0	-1	-1	-1	-1	-1	-1	-1
60.9844	74.5313	69.58	2	-1	1	16.7719	11.4205	2.42321	1.90625		-1	-1	0	0	-1	-1	-1	-1	-1	-1	-1
52.6563	75.1563	69.58	1	-1	1	8.53211	10.9146	2.30963	1.90625		-1	-1	0	0	-1	-1	-1	-1	-1	-1	-1
48.4375	74.6875	69.58	1	-1	1	4.29244	11.1216	2.30984	1.90625		-1	-1	0	0	-1	-1	-1	-1	-1	-1	-1
59.1094	87.6563	69.58	1	-1	1	16.0024	10.7107	1.14202	1.90625		2	-1	0	0	-1	-1	-1	-1	-1	-1	-1
59.4219	82.3438	72.145	1	-1	1	15.7649	6.34944	1.62847	1.90625		2	-1	0	0	-1	-1	-1	-1	-1	-1	-1
59.1094	93.9063	69.58	2	-1	1	16.5249	15.0968	0.793385	1.90625		-1	-1	0	0	-1	-1	-1	-1	-1	-1	-1
63.1719	93.9063	69.58	3	-1	1	20.5698	14.7249	0.797838	1.90625		-1	-1	0	0	-1	-1	-1	-1	-1	-1	-1
53.8281	104.453	69.58	1	-1	1	12.1484	24.8789	0.538984	1.90625		-1	-1	0	0	-1	-1	-1	-1	-1	-1	-1
54.7656	112.188	69.58	1	-1	1	13.7285	32.0893	0.450889	1.90625		-1	-1	0	0	-1	-1	-1	-1	-1	-1	-1
75.3906	117.813	69.58	1	-1	1	34.7344	35.6263	0.397459	1.90625		-1	-1	0	0	-1	-1	-1	-1	-1	-1	-1
89.9219	118.047	69.58	1	-1	1	48.9448	34.5662	0.38593	1.90625		-1	-1	0	0	-1	-1	-1	-1	-1	-1	-1
96.0156	119.219	69.58	1	-1	1	54.8439	35.2285	0.372406	1.90625		-1	-1	1	0	-1	-1	-1	-1	-1	-1	-1
70.0469	103.281	69.58	2	-1	1	28.1989	22.2909	0.552721	1.90625		-1	-1	0	0	-1	-1	-1	-1	-1	-1	-1
68.5938	107.734	69.58	1	-1	1	27.1244	26.5852	0.489902	1.90625		-1	-1	0	0	-1	-1	-1	-1	-1	-1	-1
74.1094	105.156	69.58	2	-1	1	32.4005	23.6545	0.521794	1.90625		-1	-1	0	0	-1	-1	-1	-1	-1	-1	-1
74.4531	50.0781	69.58	1	-1	1	28.1378	33.7815	3.059	1.90625		-1	-1	0	0	-1	-1	-1	-1	-1	-1	-1
82.4219	48.9063	69.58	1	-1	1	35.974	35.4878	3.08056	1.90625		-1	-1	0	0	-1	-1	-1	-1	-1	-1	-1
79.375	42.8125	67.62	1	-1	1	32.5107	41.6371	3.06308	1.90625		-1	-1	0	0	-1	-1	-1	-1	-1	-1	-1
69.0625	43.5156	67.62	1	-1	1	22.3016	40.2299	3.04355	1.90625		-1	-1	0	0	-1	-1	-1	-1	-1	-1	-1
84.5313	109.375	62.72	2	-1	1	43.379	29.4105	0.687469	1.90625		-1	-1	0	0	-1	-1	-1	-1	-1	-1	-1
89.4531	109.609	62.72	2	-1	1	48.1964	29.1699	0.683344	1.90625		-1	-1	0	0	-1	-1	-1	-1	-1	-1	-1
95.0781	109.844	62.72	2	-1	1	53.6908	28.8888	0.677589	1.90625		-1	-1	0	0	-1	-1	-1	-1	-1	-1	-1
100	112.188	62.72	2	-1	1	58.6145	30.5465	0.63705	1.90625		-1	-1	0	0	-1	-1	-1	-1	-1	-1	-1
104.688	112.188	62.72	2	-1	1	63.1539	30.1873	0.632677	1.90625		-1	-1	0	0	-1	-1	-1	-1	-1	-1	-1
109.375	113.359	62.72	2	-1	1	67.7403	30.9003	0.610105	1.90625		-1	-1	1	0	-1	-1	-1	-1	-1	-1	-1
81.0156	107.656	65.895	2	-1	1	39.6359	26.7446	0.61595	1.90625		-1	-1	1	0	-1	-1	-1	-1	-1	-1	-1
71.1719	103.047	62.72	2	-1	1	29.5786	25.3743	0.808505	1.90625		-1	-1	0	0	-1	-1	-1	-1	-1	-1	-1
64.8438	100.703	62.72	2	-1	1	23.082	24.1203	0.861989	1.90625		-1	-1	0	0	-1	-1	-1	-1	-1	-1	-1
145.469	122.5	63.7	2	-1	1	102.515	37.5588	0.419804	1.90625		-1	-1	0	0	-1	-1	-1	-1	-1	-1	-1
152.5	123.438	63.7	2	-1	1	109.318	38.3631	0.398214	1.90625		-1	-1	0	0	-1	-1	-1	-1	-1	-1	-1
159.766	124.375	63.7	2	-1	1	116.402	39.2141	0.377078	1.90625		-1	-1	0	0	-1	-1	-1	-1	-1	-1	-1
164.688	125.078	63.7	2	-1	1	121.236	39.8794	0.363153	1.90625		-1	-1	0	0	-1	-1	-1	-1	-1	-1	-1
173.125	125.781	63.7	2	-1	1	129.602	40.554	0.343292	1.90625		-1	-1	0	0	-1	-1	-1	-1	-1	-1	-1
127.891	48.2031	67.62	2	-1	1	84.0134	38.546	3.11476	1.90625		-1	-1	1	0	-1	-1	-1	-1	-1	-1	-1
220.469	43.5156	67.62	2	-1	1	176.503	42.294	-3.00076	1.90625		-1	-1	1	0	-1	-1	-1	-1	-1	-1	-1
239.453	38.3594	65.66	2	-1	1	194.868	47.8449	-3.02677	1.90625		-1	-1	0	0	-1	-1	-1	-1	-1	-1	-1
259.609	39.5313	65.66	2	-1	1	214.461	47.2741	-3.01908	1.90625		-1	-1	0	0	-1	-1	-1	-1	-1	-1	-1
277.656	40.4688	65.66	2	-1	1	232.073	47.0743	-3.01571	1.90625		-1	-1	0	0	-1	-1	-1	-1	-1	-1	-1
286.563	40.7031	65.66	2	-1	1	240.775	47.2655	-3.01498	1.90625		-1	-1	0	0	-1	-1	-1	-1	-1	-1	-1
210.625	44.2188	66.64	2	-1	1	166.997	41.5536	-3.03452	1.90625		-1	-1	0	0	-1	-1	-1	-1	-1	-1	-1
199.844	43.9844	66.64	2	-1	1	156.536	41.794	-3.047	1.90625		-1	-1	0	0	-1	-1	-1	-1	-1	-1	-1
190.234	45.1563	66.64	2	-1	1	147.188	40.7029	-3.0624	1.90625		-1	-1	0	0	-1	-1	-1	-1	-1	-1	-1
178.984	45.3906	66.64	2	-1	1	136.189	40.6386	-3.08086	1.90625		-1	-1	0	0	-1	-1	-1	-1	-1	-1	-1
169.375	45.1563	66.64	2	-1	1	126.717	41.0673	-3.09715	1.90625		-1	-1	0	0	-1	-1	-1	-1	-1	-1	-1
160.469	47.5	66.64	2	-1	1	117.798	38.9486	-3.12177	1.90625		-1	-1	0	0	-1	-1	-1	-1	-1	-1	-1
183.438	117.109	67.62	3	-1	1	139.775	31.443	0.247457	1.90625		-1	-1	0	0	-1	-1	-1	-1	-1	-1	-1
187.188	116.641	67.62	3	-1	1	143.565	30.9901	0.240835	1.90625		-1	-1	0	0	-1	-1	-1	-1	-1	-1	-1
189.297	117.109	67.62	3	-1	1	145.695	31.4638	0.235414	1.90625		-1	-1	0	0	-1	-1	-1	-1	-1	-1	-1
192.813	117.813	67.62	3	-1	1	149.253	32.1726	0.227181	1.90625		-1	-1	0	0	-1	-1	-1	-1	-1	-1	-1
200.078	118.516	67.62	3	-1	1	156.636	32.8742	0.213555	1.90625		-1	-1	0	0	-1	-1	-1	-1	-1	-1	-1
204.531	118.281	67.62	3	-1	1	161.173	32.6271	0.207157	1.90625		-1	-1	0	0	-1	-1	-1	-1	-1	-1	-1
211.797	118.281	67.62	3	-1	1	168.585	32.5818	0.19727	1.90625		-1	-1	0	0	-1	-1	-1	-1	-1	-1	-1
217.422	117.813	67.62	3	-1	1	174.323	32.0563	0.191007	1.90625		-1	-1	0	0	-1	-1	-1	-1	-1	-1	-1
221.875	117.813	67.62	3	-1	1	178.869	31.997	0.186195	1.90625		-1	-1	0	0	-1	-1	-1	-1	-1	-1	-1
227.266	118.047	67.62	3	-1	1	184.377	32.1426	0.180865	1.90625		-1	-1	0	0	-1	-1	-1	-1	-1	-1	-1
231.719	118.047	67.62	3	-1	1	188.922	32.0552	0.177109	1.90625		-1	-1	0	0	-1	-1	-1	-1	-1	-1	-1
235.938	118.75	67.62	3	-1	1	193.244	32.6637	0.173687	1.90625		-1	-1	0	0	-1	-1	-1	-1	-1	-1	-1
240.156	118.047	67.62	3	-1	1	197.531	31.8551	0.171147	1.90625		-1	-1	0	0	-1	-1	-1	-1	-1	-1	-1
244.609	118.281	67.62	3	-1	1	202.077	31.9658	0.168527	1.90625		-1	-1	0	0	-1	-1	-1	-1	-1	-1	-1
250.703	118.516	67.62	3	-1	1	208.294	32.0114	0.165605	1.90625		-1	-1	0	0	-1	-1	-1	-1	-1	-1	-1
256.094	118.516	67.62	3	-1	1	213.782	31.826	0.163598	1.90625		-1	-1	0	0	-1	-1	-1	-1	-1	-1	-1
259.609	119.219	67.62	3	-1	1	217.386	32.3988	0.162569	1.90625		-1	-1	0	0	-1	-1	-1	-1	-1	-1	-1
265.234	118.281	67.62	3	-1	1	223.068	31.2398	0.161258	1.90625		-1	-1	0	0	-1	-1	-1	-1	-1	-1	-1
270.156	118.047	67.62	3	-1	1	228.057	30.7972	0.160506	1.90625		-1	-1	0	0	-1	-1	-1	-1	-1	-1	-1
275.078	118.047	67.62	3	-1	1	233.051	30.5761	0.160134	1.90625		-1	-1	0	0	-1	-1	-1	-1	-1	-1	-1
279.766	119.219	67.62	3	-1	1	237.862	31.5247	0.16028	1.90625		-1	-1	0	0	-1	-1	-1	-1	-1	-1	-1
285.859	119.922	67.62	3	-1	1	244.075	31.9224	0.160802	1.90625		-1	-1	0	0	-1	-1	-1	-1	-1	-1	-1
212.266	111.016	67.62	4	-1	1	169.011	25.3184	0.207016	1.90625		-1	-1	1	0	-1	-1	-1	-1	-1	-1	-1
227.969	110.313	67.62	4	-1	1	184.952	24.3983	0.186199	1.90625		-1	-1	1	0	-1	-1	-1	-1	-1	-1	-1
233.125	111.484	67.62	4	-1	1	190.214	25.4649	0.179687	1.90625		-1	-1	1	0	-1	-1	-1	-1	-1	-1	-1
199.609	111.016	67.62	4	-1	1	156.17	25.3891	0.230259	1.90625		-1	-1	0	0	-1	-1	-1	-1	-1	-1	-1
242.266	110.781	66.64	4	-1	1	199.498	24.5642	0.211911	1.90625		-1	-1	0	0	-1	-1	-1	-1	-1	-1	-1
246.953	110.547	66.64	4	-1	1	204.244	24.1907	0.209238	1.90625		-1	-1	0	0	-1	-1	-1	-1	-1	-1	-1
254.922	111.016	66.64	4	-1	1	212.334	24.3928	0.204304	1.90625		-1	-1	0	0	-1	-1	-1	-1	-1	-1	-1
265.938	111.016	66.64	4	-1	1	223.484	23.9677	0.20104	1.90625		-1	-1	0	0	-1	-1	-1	-1	-1	-1	-1
274.375	111.25	66.64	4	-1	1	232.026	23.8334	0.199903	1.90625		-1	-1	0	0	-1	-1	-1	-1	-1	-1	-1
282.344	111.953	66.64	4	-1	1	240.11	24.1556	0.199421	1.90625		-1	-1	0	0	-1	-1	-1	-1	-1	-1	-1
289.141	112.891	66.64	4	-1	1	247.02	24.7442	0.199462	1.90625		-1	-1	0	0	-1	-1	-1	-1	-1	-1	-1
320.313	114.531	66.64	4	-1	1	278.532	24.5471	0.212518	1.90625		-1	-1	1	0	-1	-1	-1	-1	-1	-1	-1
296.641	63.2031	72.52	4	-1	1	251.866	25.7804	-2.7817	1.90625		-1	-1	0	0	-1	-1	-1	-1	-1	-1	-1
291.25	62.5	72.52	4	-1	1	246.495	26.1898	-2.78407	1.90625		-1	-1	0	0	-1	-1	-1	-1	-1	-1	-1
283.047	61.5625	72.52	4	-1	1	238.336	26.7037	-2.78761	1.90625		-1	-1	0	0	-1	-1	-1	-1	-1	-1	-1
276.016	61.7969	72.52	4	-1	1	231.396	26.1469	-2.78422	1.90625		-1	-1	0	0	-1	-1	-1	-1	-1	-1	-1
268.984	61.3281	72.52	4	-1	1	224.427	26.2993	-2.78691	1.90625		-1	-1	0	0	-1	-1	-1	-1	-1	-1	-1
262.422	61.7969	72.52	4	-1	1	217.961	25.5716	-2.78375	1.90625		-1	-1	0	0	-1	-1	-1	-1	-1	-1	-1
257.031	61.5625	72.52	4	-1	1	212.627	25.5952	-2.78651	1.90625		-1	-1	0	0	-1	-1	-1	-1	-1	-1	-1
251.406	60.8594	72.52	4	-1	1	207.05	26.0845	-2.79345	1.90625		-1	-1	0	0	-1	-1	-1	-1	-1	-1	-1
172.656	63.2031	72.52	4	-1	1	129.293	22.7527	-2.92083	1.90625		-1	-1	1	0	-1	-1	-1	-1	-1	-1	-1
303.438	61.3281	72.52	4	-1	1	258.485	27.9875	-2.79856	1.90625		-1	-1	0	0	2	-1	-1	-1	-1	-1	-1
310.234	62.0313	72.52	4	-1	1	265.249	27.6805	-2.79856	1.90625		-1	-1	0	0	2	-1	-1	-1	-1	-1	-1
317.734	62.0313	72.52	4	-1	1	272.668	28.1217	-2.80415	1.90625		-1	-1	0	0	2	-1	-1	-1	-1	-1	-1
325.469	62.9688	72.52	4	-1	1	280.381	27.6736	-2.80496	1.90625		-1	-1	0	0	2	-1	-1	-1	-1	-1	-1
332.266	62.7344	72.52	4	-1	1	287.092	28.3358	-2.81255	1.90625		-1	-1	0	0	2	-1	-1	-1	-1	-1	-1
339.063	63.2031	72.52	4	-1	1	293.894	28.3155	-2.81652	1.90625		-1	-1	0	0	2	-1	-1	-1	-1	-1	-1
345.625	63.4375	72.52	4	-1	1	300.456	28.5117	-2.82156	1.90625		-1	-1	0	0	2	-1	-1	-1	-1	-1	-1
343.047	67.4219	72.52	4	-1	1	298.158	24.4246	-2.79403	1.90625		-1	-1	0	0	2	-1	-1	-1	-1	-1	-1
336.016	67.1875	72.52	4	-1	1	291.128	24.2025	-2.78734	1.90625		-1	-1	0	0	2	-1	-1	-1	-1	-1	-1
348.906	68.3594	72.52	4	-1	1	304.067	23.8818	-2.79413	1.90625		-1	-1	0	0	2	-1	-1	-1	-1	-1	-1
351.719	63.4375	72.52	4	-1	1	306.535	28.9093	-2.82729	1.90625		-1	-1	0	0	2	-1	-1	-1	-1	-1	-1
312.344	115.938	75.46	4	-1	1	270.704	27.555	-0.119139	1.90625		-1	-1	0	0	2	-1	-1	-1	-1	-1	-1
307.188	115.234	75.46	4	-1	1	265.449	27.2021	-0.125358	1.90625		-1	-1	0	0	2	-1	-1	-1	-1	-1	-1
346.563	116.406	75.46	4	-1	1	305.074	25.6506	-0.11842	1.90625		-1	-1	0	0	2	-1	-1	-1	-1	-1	-1
351.484	115.938	75.46	4	-1	1	309.952	24.8551	-0.124345	1.90625		-1	-1	0	0	2	-1	-1	-1	-1	-1	-1
112.188	104.219	71.54	4	-1	1	69.5088	19.1291	0.394487	1.90625		-1	-1	0	0	2	-1	-1	-1	-1	-1	-1
105.859	102.578	71.54	4	-1	1	63.2763	17.9322	0.434102	1.90625		-1	-1	0	0	2	-1	-1	-1	-1	-1	-1
90.5938	100.898	71.54	4	-1	1	48.2664	17.5027	0.491224	1.90625		-1	-1	0	0	2	-1	-1	-1	-1	-1	-1
113.359	99.5313	60.76	4	-1	1	71.1884	20.4873	0.989503	1.90625		-1	-1	0	0	2	-1	-1	-1	-1	-1	-1
80.1563	97.1875	61.5412	4	-1	1	38.0822	21.1022	1.02824	1.90625		-1	-1	0	0	2	-1	-1	-1	-1	-1	-1
135.391	105.625	70.56	4	-1	1	92.1621	19.7867	0.345653	1.90625		-1	-1	1	0	-1	-1	-1	-1	-1	-1	-1
127.422	104.922	70.56	4	-1	1	84.4011	19.332	0.384207	1.90625		-1	-1	0	0	-1	-1	-1	-1	-1	-1	-1
120.391	104.688	70.56	4	-1	1	77.5622	19.3938	0.412124	1.90625		-1	-1	0	0	-1	-1	-1	-1	-1	-1	-1
144.531	107.266	70.56	4	-1	1	101.078	21.2597	0.296075	1.90625		-1	-1	0	0	-1	-1	-1	-1	-1	-1	-1
152.266	107.969	70.56	4	-1	1	108.649	21.9214	0.261763	1.90625		-1	-1	0	0	-1	-1	-1	-1	-1	-1	-1
165.156	108.438	70.56	4	-1	1	121.373	22.4517	0.211713	1.90625		-1	-1	0	0	-1	-1	-1	-1	-1	-1	-1
174.063	109.141	70.56	4	-1	1	130.243	23.2476	0.180323	1.90625		-1	-1	0	0	-1	-1	-1	-1	-1	-1	-1
181.797	110.078	70.56	4	-1	1	137.996	24.2732	0.156754	1.90625		-1	-1	0	0	-1	-1	-1	-1	-1	-1	-1
191.406	110.313	70.56	4	-1	1	147.696	24.6009	0.131798	1.90625		-1	-1	0	0	-1	-1	-1	-1	-1	-1	-1
198.672	110.313	70.56	4	-1	1	155.061	24.6469	0.115193	1.90625		-1	-1	0	0	-1	-1	-1	-1	-1	-1	-1
207.109	111.484	70.56	4	-1	1	163.638	25.8335	0.101107	1.90625		-1	-1	0	0	-1	-1	-1	-1	-1	-1	-1
106.563	71.1719	63.7	4	-1	1	62.805	18.9526	2.57589	1.90625		-1	-1	0	0	-1	-1	-1	-1	-1	-1	-1
111.016	70.9375	63.7	4	-1	1	67.3916	19.1106	2.60254	1.90625		-1	-1	0	0	-1	-1	-1	-1	-1	-1	-1
116.641	70.2344	63.7	4	-1	1	73.173	19.5973	2.64795	1.90625		-1	-1	0	0	-1	-1	-1	-1	-1	-1	-1
122.734	70	63.7	4	-1	1	79.456	19.6722	2.6788	1.90625		-1	-1	0	0	-1	-1	-1	-1	-1	-1	-1
100.234	63.6719	63.7	3	-1	1	55.7799	24.9132	2.75632	1.90625		-1	-1	0	0	-1	-1	-1	-1	-1	-1	-1
105.156	63.4375	63.7	3	-1	1	60.9059	25.224	2.77651	1.90625		-1	-1	0	0	-1	-1	-1	-1	-1	-1	-1
89.4531	65.8594	65.6037	3	-1	1	44.6523	21.67	2.73953	1.90625		-1	-1	0	0	2	-1	-1	-1	-1	-1	-1
94.375	64.1406	63.7	3	-1	1	49.7086	24.3395	2.72737	1.90625		-1	-1	0	0	2	-1	-1	-1	-1	-1	-1
110.313	63.9063	63.7	3	-1	1	66.3211	24.8893	2.78329	1.90625		-1	-1	0	0	2	-1	-1	-1	-1	-1	-1
147.813	60.625	63.7	3	-1	1	105.12	27.2459	2.94809	1.90625		-1	-1	0	0	2	-1	-1	-1	-1	-1	-1
170.547	59.9219	59.78	3	-1	1	128.199	28.4296	2.88559	1.90625		-1	-1	0	0	2	-1	-1	-1	-1	-1	-1
174.063	59.6875	59.78	3	-1	1	131.666	28.4983	2.89673	1.90625		-1	-1	0	0	2	-1	-1	-1	-1	-1	-1
185.781	58.0469	59.78	3	-1	1	143.165	29.6021	2.94215	1.90625		-1	-1	0	0	2	-1	-1	-1	-1	-1	-1
189.531	57.1094	58.0256	3	-1	1	146.936	31.005	2.9068	1.90625		-1	-1	0	0	2	-1	-1	-1	-1	-1	-1
202.891	58.2813	59.78	3	-1	1	159.839	28.9863	2.97056	1.90625		-1	-1	0	0	2	-1	-1	-1	-1	-1	-1
206.875	57.1094	59.78	3	-1	1	163.714	30.0457	2.98955	1.90625		-1	-1	0	0	2	-1	-1	-1	-1	-1	-1
99.5313	99.7656	55.86	3	-1	1	57.8012	25.5468	1.11598	1.90625		-1	-1	0	0	2	-1	-1	-1	-1	-1	-1
115.469	100	55.86	3	-1	1	73.6318	24.4118	1.10968	1.90625		-1	-1	0	0	2	-1	-1	-1	-1	-1	-1
118.984	99.375	59.0412	4	-1	1	76.8629	21.2465	1.04366	1.90625		-1	-1	0	0	2	-1	-1	-1	-1	-1	-1
173.359	81.25	100.94	3	-1	1	127.595	30.137	-1.56587	1.90625		-1	-1	1	0	-1	-1	-1	-1	-1	-1	-1
206.406	79.8438	100.94	3	-1	1	161.357	32.3776	-1.59065	1.90625		-1	-1	1	0	-1	-1	-1	-1	-1	-1	-1
129.766	81.9531	100.94	3	-1	1	83.9194	26.504	-1.56582	1.90625		-1	-1	1	0	-1	-1	-1	-1	-1	-1	-1
83.5938	91.5625	100.94	3	-1	1	39.4307	24.7476	-1.0823	1.90625		-1	-1	1	0	-1	-1	-1	-1	-1	-1	-1
76.7969	90.625	100.94	3	-1	1	32.5849	24.3686	-1.09291	1.90625		-1	-1	1	0	-1	-1	-1	-1	-1	-1	-1
103.594	66.7188	101.151	2	-1	1	57.3025	30.6672	-2.0487	1.90625		-1	-1	1	0	-1	-1	-1	-1	-1	-1	-1
107.734	104.922	100.94	2	-1	1	63.4539	31.4877	-0.73679	1.90625		-1	-1	0	0	-1	-1	-1	-1	-1	-1	-1
116.172	106.094	100.94	2	-1	1	71.4767	32.4112	-0.728476	1.90625		-1	-1	0	0	-1	-1	-1	-1	-1	-1	-1
99.2969	103.75	100.94	2	-1	1	55.4077	30.6839	-0.744208	1.90625		-1	-1	0	0	-1	-1	-1	-1	-1	-1	-1
89.9219	101.875	100.94	2	-1	1	46.3848	29.5834	-0.766705	1.90625		-1	-1	0	0	-1	-1	-1	-1	-1	-1	-1
102.344	59.2188	98	2	-1	1	55.7418	33.4555	-2.28589	1.90625		-1	-1	0	0	-1	-1	-1	-1	-1	-1	-1
96.7188	59.4531	98	2	-1	1	50.0555	32.7971	-2.28051	1.90625		-1	-1	0	0	-1	-1	-1	-1	-1	-1	-1
120.859	58.5156	98	2	-1	1	74.5755	35.4398	-2.28997	1.90625		-1	-1	0	0	-1	-1	-1	-1	-1	-1	-1
127.422	57.5781	98	2	-1	1	81.2665	36.6186	-2.29934	1.90625		-1	-1	0	0	-1	-1	-1	-1	-1	-1	-1
133.984	57.1094	98	2	-1	1	87.9868	37.4023	-2.29853	1.90625		-1	-1	0	0	-1	-1	-1	-1	-1	-1	-1
140.313	56.875	98	2	-1	1	94.4735	37.9583	-2.29271	1.90625		-1	-1	0	0	-1	-1	-1	-1	-1	-1	-1
145.938	55	98	2	-1	1	100.237	39.724	-2.31359	1.90625		-1	-1	0	0	-1	-1	-1	-1	-1	-1	-1
129.297	113.828	97.02	2	-1	1	84.3557	35.5685	-0.514782	1.90625		-1	-1	0	0	-1	-1	-1	-1	-1	-1	-1
121.328	113.125	97.02	2	-1	1	76.8306	34.7928	-0.510056	1.90625		-1	-1	0	0	-1	-1	-1	-1	-1	-1	-1
114.766	113.281	95.5825	2	-1	1	70.7678	33.9556	-0.45903	1.90625		-1	-1	1	0	-1	-1	-1	-1	-1	-1	-1
103.75	110.078	97.02	2	-1	1	60.1841	32.29	-0.525259	1.90625		-1	-1	0	0	-1	-1	-1	-1	-1	-1	-1
96.25	109.375	97.02	2	-1	1	53.0765	31.8477	-0.519748	1.90625		-1	-1	0	0	-1	-1	-1	-1	-1	-1	-1
141.719	116.641	97.02	2	-1	1	96.1886	38.3055	-0.492084	1.90625		-1	-1	0	0	-1	-1	-1	-1	-1	-1	-1
149.453	116.641	97.02	2	-1	1	103.644	38.7115	-0.505603	1.90625		-1	-1	0	0	-1	-1	-1	-1	-1	-1	-1
155.781	116.641	97.02	2	-1	1	109.827	39.0786	-0.515814	1.90625		-1	-1	0	0	-1	-1	-1	-1	-1	-1	-1
163.75	116.641	97.02	2	-1	1	117.727	39.5634	-0.527543	1.90625		-1	-1	0	0	-1	-1	-1	-1	-1	-1	-1
171.953	117.344	97.02	2	-1	1	125.981	40.6037	-0.527213	1.90625		-1	-1	0	0	-1	-1	-1	-1	-1	-1	-1
180.156	117.813	97.02	2	-1	1	134.353	41.4341	-0.529574	1.90625		-1	-1	0	0	-1	-1	-1	-1	-1	-1	-1
192.578	119.688	97.02	2	-1	1	147.192	43.4988	-0.514442	1.90625		-1	-1	0	0	-1	-1	-1	-1	-1	-1	-1
140.547	51.0156	89.18	2	-1	1	95.4502	38.3807	-2.56987	1.90625		-1	-1	0	0	-1	-1	-1	-1	-1	-1	-1
134.453	51.4844	89.18	2	-1	1	89.1367	37.7067	-2.57666	1.90625		-1	-1	0	0	-1	-1	-1	-1	-1	-1	-1
130	51.7188	89.18	2	-1	1	84.5121	37.2892	-2.58225	1.90625		-1	-1	0	0	-1	-1	-1	-1	-1	-1	-1
147.344	50.5469	89.18	2	-1	1	102.465	39.0421	-2.56114	1.90625		-1	-1	0	0	-1	-1	-1	-1	-1	-1	-1
155.547	50.5469	89.18	2	-1	1	110.873	39.2805	-2.54435	1.90625		-1	-1	0	0	-1	-1	-1	-1	-1	-1	-1
163.75	50.5469	89.18	2	-1	1	119.214	39.488	-2.52772	1.90625		-1	-1	0	0	-1	-1	-1	-1	-1	-1	-1
169.141	50.0781	89.18	2	-1	1	124.668	40.034	-2.52242	1.90625		-1	-1	0	0	-1	-1	-1	-1	-1	-1	-1
197.969	49.1406	89.18	2	-1	1	153.489	41.5072	-2.48757	1.90625		-1	-1	0	0	-1	-1	-1	-1	-1	-1	-1
202.656	48.4375	89.18	2	-1	1	158.143	42.2383	-2.49016	1.90625		-1	-1	0	0	-1	-1	-1	-1	-1	-1	-1
211.563	47.5	89.18	2	-1	1	166.965	43.2866	-2.49198	1.90625		-1	-1	0	0	-1	-1	-1	-1	-1	-1	-1
175.469	51.0156	89.18	2	-1	1	131.021	39.3411	-2.49995	1.90625		-1	-1	0	0	2	-1	-1	-1	-1	-1	-1
180.156	50.3125	89.18	2	-1	1	135.728	40.0696	-2.49994	1.90625		-1	-1	0	0	2	-1	-1	-1	-1	-1	-1
185.781	49.8438	89.18	2	-1	1	141.354	40.6093	-2.49627	1.90625		-1	-1	0	0	2	-1	-1	-1	-1	-1	-1
191.406	49.1406	89.18	2	-1	1	146.965	41.3567	-2.49607	1.90625		-1	-1	0	0	2	-1	-1	-1	-1	-1	-1
219.063	46.5625	89.18	2	-1	1	174.376	44.3134	-2.49641	1.90625		-1	-1	0	0	2	-1	-1	-1	-1	-1	-1
224.453	46.5625	89.18	2	-1	1	179.704	44.4639	-2.49322	1.90625		-1	-1	0	0	2	-1	-1	-1	-1	-1	-1
230.078	46.3281	89.18	2	-1	1	185.259	44.8359	-2.49304	1.90625		-1	-1	0	0	2	-1	-1	-1	-1	-1	-1
146.641	118.984	89.18	2	-1	1	101.56	36.4171	-0.290404	1.90625		-1	-1	0	0	2	-1	-1	-1	-1	-1	-1
139.141	118.516	89.18	2	-1	1	94.3617	35.7296	-0.279901	1.90625		-1	-1	0	0	2	-1	-1	-1	-1	-1	-1
86.875	110.078	89.18	2	-1	1	44.5992	28.6282	-0.261872	1.90625		-1	-1	0	0	2	-1	-1	-1	-1	-1	-1
182.969	122.266	87.22	2	-1	1	137.892	40.1364	-0.2714	1.90625		-1	-1	0	0	2	-1	-1	-1	-1	-1	-1
185.781	122.266	87.22	2	-1	1	140.78	40.242	-0.27528	1.90625		-1	-1	0	0	2	-1	-1	-1	-1	-1	-1
189.063	122.266	87.22	2	-1	1	144.159	40.3584	-0.279621	1.90625		-1	-1	0	0	2	-1	-1	-1	-1	-1	-1
192.578	122.266	87.22	2	-1	1	147.79	40.4742	-0.284058	1.90625		-1	-1	0	0	2	-1	-1	-1	-1	-1	-1
195.391	122.734	87.22	2	-1	1	150.698	40.9825	-0.282508	1.90625		-1	-1	0	0	2	-1	-1	-1	-1	-1	-1
198.672	123.203	87.22	2	-1	1	154.1	41.4959	-0.281404	1.90625		-1	-1	0	0	2	-1	-1	-1	-1	-1	-1
127.188	116.875	87.22	2	-1	1	83.147	33.1959	-0.219058	1.90625		-1	-1	1	0	-1	-1	-1	-1	-1	-1	-1
120.156	114.063	87.22	2	-1	1	76.4315	30.5591	-0.234589	1.90625		-1	-1	1	0	-1	-1	-1	-1	-1	-1	-1
113.125	113.359	87.22	2	-1	1	69.7616	29.9567	-0.224876	1.90625		-1	-1	0	0	-1	-1	-1	-1	-1	-1	-1
107.969	114.063	87.22	2	-1	1	64.9229	30.7051	-0.203034	1.90625		-1	-1	0	0	-1	-1	-1	-1	-1	-1	-1
103.281	113.359	87.22	2	-1	1	60.4609	30.1794	-0.199379	1.90625		-1	-1	0	0	-1	-1	-1	-1	-1	-1	-1
96.7188	112.188	87.22	2	-1	1	54.1821	29.3325	-0.196696	1.90625		-1	-1	0	0	-1	-1	-1	-1	-1	-1	-1
80.5469	106.797	87.22	2	-1	1	38.2292	25.2192	-0.226622	1.90625		-1	-1	0	0	-1	-1	-1	-1	-1	-1	-1
75.3906	105.156	87.22	2	-1	1	32.9581	24.0271	-0.237634	1.90625		-1	-1	0	0	-1	-1	-1	-1	-1	-1	-1
70.2344	102.344	87.22	2	-1	1	27.5891	21.7742	-0.271414	1.90625		-1	-1	0	0	-1	-1	-1	-1	-1	-1	-1
151.563	119.219	87.22	2	-1	1	106.493	36.0124	-0.248977	1.90625		-1	-1	0	0	-1	-1	-1	-1	-1	-1	-1
156.25	119.453	87.22	2	-1	1	111.075	36.4213	-0.256032	1.90625		-1	-1	0	0	-1	-1	-1	-1	-1	-1	-1
160.469	119.922	87.22	2	-1	1	115.229	37.0336	-0.259152	1.90625		-1	-1	0	0	-1	-1	-1	-1	-1	-1	-1
163.984	119.922	87.22	2	-1	1	118.719	37.1907	-0.265777	1.90625		-1	-1	0	0	-1	-1	-1	-1	-1	-1	-1
167.266	119.922	87.22	2	-1	1	121.997	37.339	-0.271736	1.90625		-1	-1	0	0	-1	-1	-1	-1	-1	-1	-1
171.719	119.922	87.22	2	-1	1	126.474	37.5397	-0.279469	1.90625		-1	-1	0	0	-1	-1	-1	-1	-1	-1	-1
175	121.328	87.22	2	-1	1	129.775	38.9591	-0.269374	1.90625		-1	-1	0	0	-1	-1	-1	-1	-1	-1	-1
178.047	121.563	87.22	2	-1	1	132.87	39.3007	-0.271605	1.90625		-1	-1	0	0	-1	-1	-1	-1	-1	-1	-1
202.656	124.609	87.22	2	-1	1	158.239	42.8641	-0.271581	1.90625		-1	-1	0	0	-1	-1	-1	-1	-1	-1	-1
205.234	124.375	87.22	2	-1	1	160.923	42.7039	-0.276501	1.90625		-1	-1	0	0	-1	-1	-1	-1	-1	-1	-1
208.516	124.375	87.22	2	-1	1	164.34	42.7617	-0.279708	1.90625		-1	-1	0	0	-1	-1	-1	-1	-1	-1	-1
213.203	124.609	87.22	2	-1	1	169.226	43.0379	-0.281711	1.90625		-1	-1	0	0	-1	-1	-1	-1	-1	-1	-1
218.125	125.313	87.22	2	-1	1	174.364	43.7175	-0.279033	1.90625		-1	-1	0	0	-1	-1	-1	-1	-1	-1	-1
223.047	124.844	87.22	2	-1	1	179.487	43.3149	-0.287641	1.90625		-1	-1	0	0	-1	-1	-1	-1	-1	-1	-1
227.5	124.375	87.22	2	-1	1	184.115	42.8933	-0.295841	1.90625		-1	-1	0	0	-1	-1	-1	-1	-1	-1	-1
232.188	124.375	87.22	2	-1	1	188.99	42.8735	-0.299303	1.90625		-1	-1	0	0	-1	-1	-1	-1	-1	-1	-1
236.875	124.375	87.22	2	-1	1	193.86	42.8337	-0.302599	1.90625		-1	-1	0	0	-1	-1	-1	-1	-1	-1	-1
251.641	130.469	71.54	2	-1	1	209.6	44.0966	0.0758786	1.90625		-1	-1	0	0	-1	-1	-1	-1	-1	-1	-1
242.5	129.766	71.54	2	-1	1	200.174	43.6627	0.0781132	1.90625		-1	-1	0	0	-1	-1	-1	-1	-1	-1	-1
233.594	130.234	71.54	2	-1	1	191.006	44.3346	0.0835288	1.90625		-1	-1	0	0	-1	-1	-1	-1	-1	-1	-1
224.453	130.234	71.54	2	-1	1	181.571	44.4865	0.0893419	1.90625		-1	-1	0	0	-1	-1	-1	-1	-1	-1	-1
215.078	129.531	71.54	2	-1	1	171.88	43.8779	0.0956589	1.90625		-1	-1	0	0	-1	-1	-1	-1	-1	-1	-1
208.75	128.828	71.54	2	-1	1	165.345	43.2026	0.100627	1.90625		-1	-1	0	0	-1	-1	-1	-1	-1	-1	-1
201.484	128.594	71.54	2	-1	1	157.86	42.9646	0.108228	1.90625		-1	-1	0	0	-1	-1	-1	-1	-1	-1	-1
193.281	128.594	71.54	2	-1	1	149.436	42.9198	0.118498	1.90625		-1	-1	0	0	-1	-1	-1	-1	-1	-1	-1
185.781	126.953	71.54	2	-1	1	141.789	41.2078	0.127925	1.90625		-1	-1	0	0	-1	-1	-1	-1	-1	-1	-1
177.344	126.25	71.54	2	-1	1	133.248	40.3983	0.141558	1.90625		-1	-1	0	0	-1	-1	-1	-1	-1	-1	-1
316.094	136.328	71.54	2	-1	1	275.765	46.6998	0.0852089	1.90625		-1	-1	0	0	-1	-1	-1	-1	-1	-1	-1
137.266	123.438	72.52	2	-1	1	93.9292	37.2803	0.201551	1.90625		-1	-1	0	0	-1	-1	-1	-1	-1	-1	-1
130.234	122.031	72.52	2	-1	1	87.2272	35.9753	0.219179	1.90625		-1	-1	0	0	-1	-1	-1	-1	-1	-1	-1
126.016	122.031	72.52	2	-1	1	83.2268	36.0701	0.228383	1.90625		-1	-1	0	0	-1	-1	-1	-1	-1	-1	-1
92.0313	112.422	70.56	2	-1	1	50.5299	28.7105	0.393375	1.90625		-1	-1	1	0	-1	-1	-1	-1	-1	-1	-1
82.4219	110.781	70.56	2	-1	1	41.1074	27.9532	0.41605	1.90625		-1	-1	0	0	-1	-1	-1	-1	-1	-1	-1
102.109	55.4688	72.52	2	-1	1	56.6927	29.8202	-3.11569	1.90625		-1	-1	0	0	-1	-1	-1	-1	-1	-1	-1
96.9531	55.4688	72.52	2	-1	1	51.2949	29.5197	-3.12604	1.90625		-1	-1	0	0	-1	-1	-1	-1	-1	-1	-1
91.0938	56.6406	74.4319	2	-1	1	45.189	27.7171	-3.07586	1.90625		-1	-1	0	0	-1	-1	-1	-1	-1	-1	-1
107.031	54.5313	72.52	2	-1	1	61.8028	30.9966	-3.10153	1.90625		-1	-1	0	0	-1	-1	-1	-1	-1	-1	-1
152.266	51.25	73.5	2	-1	1	108.873	34.9174	-2.96103	1.90625		-1	-1	0	0	-1	-1	-1	-1	-1	-1	-1
146.406	51.9531	73.5	2	-1	1	102.87	34.2439	-2.97513	1.90625		-1	-1	0	0	-1	-1	-1	-1	-1	-1	-1
157.891	49.375	73.5	2	-1	1	114.605	36.748	-2.94923	1.90625		-1	-1	0	0	-1	-1	-1	-1	-1	-1	-1
163.984	48.9063	73.5	2	-1	1	120.75	37.1606	-2.93619	1.90625		-1	-1	0	0	-1	-1	-1	-1	-1	-1	-1
168.672	48.9063	73.5	2	-1	1	125.44	37.1171	-2.92615	1.90625		-1	-1	0	0	-1	-1	-1	-1	-1	-1	-1
174.766	48.9063	73.5	2	-1	1	131.5	37.0656	-2.91363	1.90625		-1	-1	0	0	-1	-1	-1	-1	-1	-1	-1
180.391	48.4375	73.5	2	-1	1	137.07	37.4951	-2.90366	1.90625		-1	-1	0	0	-1	-1	-1	-1	-1	-1	-1
185.547	48.4375	73.5	2	-1	1	142.15	37.4713	-2.89431	1.90625		-1	-1	0	0	-1	-1	-1	-1	-1	-1	-1
190.703	48.4375	73.5	2	-1	1	147.217	37.4605	-2.88555	1.90625		-1	-1	0	0	-1	-1	-1	-1	-1	-1	-1
195.859	47.9688	73.5	2	-1	1	152.276	37.9302	-2.87868	1.90625		-1	-1	0	0	-1	-1	-1	-1	-1	-1	-1
202.188	47.7344	73.5	2	-1	1	158.471	38.1879	-2.87033	1.90625		-1	-1	0	0	-1	-1	-1	-1	-1	-1	-1
206.641	47.2656	73.5	2	-1	1	162.825	38.6851	-2.86597	1.90625		-1	-1	0	0	-1	-1	-1	-1	-1	-1	-1
211.563	45.3906	73.5	2	-1	1	167.625	40.5956	-2.86577	1.90625		-1	-1	0	0	-1	-1	-1	-1	-1	-1	-1
130.703	51.7188	75.46	2	-1	1	86.3872	34.4052	-2.95616	1.90625		-1	-1	0	0	-1	-1	-1	-1	-1	-1	-1
126.484	53.125	75.46	2	-1	1	81.992	32.9125	-2.96502	1.90625		-1	-1	0	0	-1	-1	-1	-1	-1	-1	-1
123.438	53.125	75.46	2	-1	1	78.7936	32.8343	-2.97196	1.90625		-1	-1	0	0	-1	-1	-1	-1	-1	-1	-1
118.047	53.125	75.46	2	-1	1	73.1252	32.6624	-2.98373	1.90625		-1	-1	0	0	-1	-1	-1	-1	-1	-1	-1
98.8281	65.3125	54.88	2	-1	1	54.9163	29.3398	2.46329	1.90625		-1	-1	0	0	-1	-1	-1	-1	-1	-1	-1
93.2031	64.8438	54.88	2	-1	1	48.9811	29.603	2.45886	1.90625		-1	-1	0	0	-1	-1	-1	-1	-1	-1	-1
88.5156	65.3125	54.88	2	-1	1	44.1143	29.2218	2.43274	1.90625		-1	-1	0	0	-1	-1	-1	-1	-1	-1	-1
82.6563	66.0156	54.88	2	-1	1	38.2363	28.6631	2.3955	1.90625		-1	-1	0	0	-1	-1	-1	-1	-1	-1	-1
101.875	58.5938	57.145	2	-1	1	57.5506	32.8283	2.67064	1.90625		-1	-1	1	0	-1	-1	-1	-1	-1	-1	-1
121.797	55	54.88	2	-1	1	78.7476	37.0484	2.72083	1.90625		-1	-1	0	0	-1	-1	-1	-1	-1	-1	-1
112.422	57.1094	54.88	2	-1	1	68.8329	35.4275	2.66765	1.90625		-1	-1	0	0	-1	-1	-1	-1	-1	-1	-1
107.5	57.5781	54.88	2	-1	1	63.6099	35.0573	2.64866	1.90625		-1	-1	0	0	-1	-1	-1	-1	-1	-1	-1
130.938	52.8906	54.88	2	-1	1	88.3998	38.6154	2.76858	1.90625		-1	-1	0	0	-1	-1	-1	-1	-1	-1	-1
138.438	53.125	54.88	2	-1	1	96.2665	38.1512	2.78001	1.90625		-1	-1	0	0	-1	-1	-1	-1	-1	-1	-1
92.9688	56.6406	55.86	1	-1	1	48.0388	34.9487	2.65352	1.90625		-1	-1	1	0	-1	-1	-1	-1	-1	-1	-1
109.844	52.1875	53.9	1	-1	1	65.8981	40.0192	2.71595	1.90625		-1	-1	1	0	-1	-1	-1	-1	-1	-1	-1
98.9063	50.5469	59.1975	1	-1	1	53.7208	38.5195	2.83149	1.90625		-1	-1	0	0	2	-1	-1	-1	-1	-1	-1
137.969	127.422	57.82	1	-1	1	95.7951	44.2655	0.53337	1.90625		-1	-1	0	0	-1	-1	-1	-1	-1	-1	-1
145	127.188	57.82	1	-1	1	102.53	43.8338	0.522703	1.90625		-1	-1	0	0	-1	-1	-1	-1	-1	-1	-1
158.828	130.703	57.82	1	-1	1	115.886	46.8757	0.472031	1.90625		-1	-1	0	0	-1	-1	-1	-1	-1	-1	-1
166.328	131.172	57.82	1	-1	1	123.237	47.233	0.456151	1.90625		-1	-1	0	0	-1	-1	-1	-1	-1	-1	-1
175	137.031	57.82	1	-1	1	131.763	52.8077	0.411159	1.90625		-1	-1	0	0	-1	-1	-1	-1	-1	-1	-1
183.203	139.141	57.82	1	-1	1	139.975	54.8106	0.391019	1.90625		-1	-1	0	0	-1	-1	-1	-1	-1	-1	-1
69.0625	121.328	57.82	1	-1	1	29.2063	43.6311	0.646263	1.90625		-1	-1	0	0	-1	-1	-1	-1	-1	-1	-1
63.9063	121.328	57.82	1	-1	1	24.0724	44.1104	0.645966	1.90625		-1	-1	0	0	-1	-1	-1	-1	-1	-1	-1
54.5313	118.047	57.82	1	-1	1	14.4637	42.1109	0.681321	1.90625		-1	-1	0	0	-1	-1	-1	-1	-1	-1	-1
89.4531	43.2813	57.82	1	-1	1	43.0686	45.1962	2.86213	1.90625		-1	-1	0	0	-1	-1	-1	-1	-1	-1	-1
113.125	41.6406	57.82	1	-1	1	68.6542	47.5467	2.91378	1.90625		-1	-1	0	0	-1	-1	-1	-1	-1	-1	-1
126.719	40.4688	60.895	1	-1	1	83.158	47.6857	3.00472	1.90625		-1	-1	0	0	-1	-1	-1	-1	-1	-1	-1
73.5938	54.0625	61.0725	1	-1	1	27.9616	33.2913	2.77674	1.90625		-1	-1	1	0	-1	-1	-1	-1	-1	-1	-1
73.5938	54.2969	68.8069	1	-1	1	27.6663	29.8917	2.99773	1.90625		-1	-1	1	0	-1	-1	-1	-1	-1	-1	-1
41.25	55.9375	58.26	1	-1	1	-3.97076	31.9816	2.59177	1.90625		-1	-1	0	0	-1	-1	-1	-1	-1	-1	-1
41.25	48.9063	70.2131	1	-1	1	-5.04522	32.4177	3.02518	1.90625		-1	-1	0	0	-1	-1	-1	-1	-1	-1	-1
38.3281	83.9063	45.8381	1	-1	1	-4.03588	33.687	1.61715	1.90625		-1	-1	0	0	-1	-1	-1	-1	-1	-1	-1
40.7813	78.4375	44.9006	1	-1	1	-2.01246	34.3434	1.78438	1.90625		-1	-1	0	0	-1	-1	-1	-1	-1	-1	-1
40.7813	71.1719	45.135	1	-1	1	-2.62947	35.2342	1.99158	1.90625		-1	-1	0	0	-1	-1	-1	-1	-1	-1	-1
38.9531	91.7188	46.3069	1	-1	1	-2.77948	34.9574	1.39411	1.90625		-1	-1	0	0	-1	-1	-1	-1	-1	-1	-1
40.7813	94.6094	35.2912	1	-1	1	-0.269175	46.1746	1.41787	1.90625		-1	-1	0	0	-1	-1	-1	-1	-1	-1	-1
40.7813	128.594	87.0881	1	-1	1	0.463673	48.992	0.0036003	1.90625		-1	-1	0	0	-1	-1	-1	-1	-1	-1	-1
40.7813	72.3438	58.0256	1	-1	1	-3.05623	22.5722	2.08581	1.90625		-1	-1	0	0	-1	-1	-1	-1	-1	-1	-1
40.7813	66.4844	60.8381	1	-1	1	-3.66062	22.8733	2.37189	1.90625		-1	-1	0	0	-1	-1	-1	-1	-1	-1	-1
40.7813	66.0156	67.635	1	-1	1	-3.9765	18.222	2.61647	1.90625		-1	-1	0	0	-1	-1	-1	-1	-1	-1	-1
40.7813	64.1406	73.9631	1	-1	1	-4.39087	16.7607	2.98684	1.90625		-1	-1	0	0	-1	-1	-1	-1	-1	-1	-1
40.7813	94.375	59.4319	1	-1	1	-1.27148	24.3279	1.1122	1.90625		-1	-1	0	0	-1	-1	-1	-1	-1	-1	-1
41.7188	102.813	54.51	1	-1	1	0.567762	33.3658	0.994807	1.90625		-1	-1	0	0	-1	-1	-1	-1	-1	-1	-1
41.7188	104.688	62.4787	1	-1	1	0.400138	29.5436	0.764362	1.90625		-1	-1	0	0	-1	-1	-1	-1	-1	-1	-1
41.7188	107.5	77.2444	1	-1	1	0.0342116	27.2957	0.235868	1.90625		-1	-1	0	0	-1	-1	-1	-1	-1	-1	-1
41.7188	107.5	90.6037	1	-1	1	-0.509618	29.5609	-0.231767	1.90625		-1	-1	0	0	-1	-1	-1	-1	-1	-1	-1
41.7188	102.109	97.635	1	-1	1	-1.24655	28.6421	-0.535359	1.90625		-1	-1	0	0	-1	-1	-1	-1	-1	-1	-1
41.7188	95.5469	92.01	1	-1	1	-1.56625	20.0052	-0.531266	1.90625		-1	-1	0	0	-1	-1	-1	-1	-1	-1	-1
42.3906	94.8438	80.0569	1	-1	1	-0.469485	14.5954	0.103315	1.90625		-1	-1	0	0	-1	-1	-1	-1	-1	-1	-1
41.7188	88.2813	78.1819	1	-1	1	-1.6108	8.14062	0.288511	1.90625		-1	-1	0	0	-1	-1	-1	-1	-1	-1	-1
41.7188	88.2813	90.8381	1	-1	1	-2.12601	14.1928	-0.798565	1.90625		-1	-1	0	0	-1	-1	-1	-1	-1	-1	-1
84.0625	67.6563	109.76	1	-1	1	37.5396	35.9811	-1.8661	1.90625		-1	-1	1	0	-1	-1	-1	-1	-1	-1	-1
115.703	65.7813	109.76	1	-1	1	68.8269	39.3174	-1.93837	1.90625		-1	-1	1	0	-1	-1	-1	-1	-1	-1	-1
41.7188	61.5625	110.057	1	-1	1	-5.14228	35.9334	-1.94691	1.90625		-1	-1	0	0	-1	-1	-1	-1	-1	-1	-1
41.7188	71.875	113.338	1	-1	1	-4.41364	35.0807	-1.64307	1.90625		-1	-1	0	0	-1	-1	-1	-1	-1	-1	-1
41.7188	88.5156	114.979	1	-1	1	-3.08912	36.7419	-1.17681	1.90625		-1	-1	0	0	-1	-1	-1	-1	-1	-1	-1
41.7188	50.7813	97.4006	1	-1	1	-5.52847	34.4268	-2.42083	1.90625		-1	-1	0	0	-1	-1	-1	-1	-1	-1	-1
41.7188	70.4688	92.9475	1	-1	1	-3.70115	16.7796	-2.01858	1.90625		-1	-1	0	0	-1	-1	-1	-1	-1	-1	-1
93.2031	66.4844	109.76	1	-1	1	46.5125	37.2046	-1.90763	1.90625		-1	-1	0	0	-1	-1	-1	-1	-1	-1	-1
100.938	66.25	109.76	1	-1	1	54.1602	37.9177	-1.92106	1.90625		-1	-1	0	0	-1	-1	-1	-1	-1	-1	-1
52.0313	122.734	76.0725	1	-1	1	11.6235	41.6292	0.229355	1.90625		-1	-1	0	0	-1	-1	-1	-1	-1	-1	-1
52.0313	122.969	84.2756	1	-1	1	11.3091	42.1643	0.0337264	1.90625		-1	-1	0	0	-1	-1	-1	-1	-1	-1	-1
51.5625	76.0938	39.0412	1	-1	1	8.76464	40.0284	1.85877	1.90625		-1	-1	0	0	-1	-1	-1	-1	-1	-1	-1
51.5625	69.2969	40.2131	1	-1	1	8.14866	40.3046	2.03008	1.90625		-1	-1	0	0	-1	-1	-1	-1	-1	-1	-1
51.5625	60.625	36.4631	1	-1	1	7.57627	46.9714	2.18381	1.90625		-1	-1	0	0	-1	-1	-1	-1	-1	-1	-1
51.5625	39.0625	87.5569	1	-1	1	3.69355	42.6681	-2.77023	1.90625		-1	-1	0	0	-1	-1	-1	-1	-1	-1	-1
45.3906	106.094	109.76	1	-1	1	2.24896	39.9886	-0.711867	1.90625		-1	-1	0	0	-1	-1	-1	-1	-1	-1	-1
32.3438	118.828	105.682	1	-1	1	-9.51066	47.25	-0.420956	1.90625		-1	-1	0	0	-1	-1	-1	-1	-1	-1	-1
32.3438	108.672	65.0569	1	-1	1	-8.70606	32.5459	0.62595	1.90625		-1	-1	0	0	-1	-1	-1	-1	-1	-1	-1
30.625	89.6875	85.26	1	-1	1	-12.827	11.8448	-0.329525	1.90625		-1	-1	0	0	-1	-1	-1	-1	-1	-1	-1
37.6563	100.938	85.26	1	-1	1	-4.88566	21.8648	-0.10872	1.90625		-1	-1	0	0	-1	-1	-1	-1	-1	-1	-1
9.53125	87.3438	85.26	1	-1	1	-34.0253	10.9423	-0.284909	1.90625		-1	-1	0	0	-1	-1	-1	-1	-1	-1	-1
21.25	46.0938	85.26	1	-1	1	-25.8062	32.6491	-2.81616	1.90625		-1	-1	0	0	-1	-1	-1	-1	-1	-1	-1
11.4063	50.7813	87.7912	1	-1	1	-35.3184	27.7195	-2.70854	1.90625		-1	-1	0	0	-1	-1	-1	-1	-1	-1	-1
71.4063	36.25	85.26	1	-1	1	23.3097	46.7963	-2.82085	1.90625		-1	-1	0	0	-1	-1	-1	-1	-1	-1	-1
89.9219	34.375	85.26	1	-1	1	41.5883	50.2881	-2.81656	1.90625		-1	-1	0	0	-1	-1	-1	-1	-1	-1	-1
113.828	33.6719	85.26	1	-1	1	67.068	52.7396	-2.80135	1.90625		-1	-1	0	0	-1	-1	-1	-1	-1	-1	-1
136.094	32.2656	85.26	1	-1	1	90.9846	55.0276	-2.77869	1.90625		-1	-1	0	0	-1	-1	-1	-1	-1	-1	-1
140.078	41.6406	85.26	1	-1	1	95.2656	45.9899	-2.73076	1.90625		-1	-1	0	0	-1	-1	-1	-1	-1	-1	-1
132.109	42.3438	85.26	1	-1	1	86.8851	45.0758	-2.74051	1.90625		-1	-1	0	0	-1	-1	-1	-1	-1	-1	-1
124.375	43.5156	85.26	1	-1	1	78.7281	43.6371	-2.74647	1.90625		-1	-1	0	0	-1	-1	-1	-1	-1	-1	-1
157.422	40.9375	90.16	1	-1	1	112.806	48.5456	-2.60682	1.90625		-1	-1	0	0	2	-1	-1	-1	-1	-1	-1
149.219	40.4688	90.16	1	-1	1	104.359	48.7974	-2.62409	1.90625		-1	-1	0	0	2	-1	-1	-1	-1	-1	-1
45.1563	62.0313	90.16	1	-1	1	-0.870522	21.4269	-2.43301	1.90625		-1	-1	0	0	-1	-1	-1	-1	-1	-1	-1
40.4688	70.2344	90.16	1	-1	1	-4.85186	14.6393	-2.13743	1.90625		-1	-1	0	0	-1	-1	-1	-1	-1	-1	-1
37.8906	76.3281	90.16	1	-1	1	-6.90932	11.3498	-1.71943	1.90625		-1	-1	0	0	-1	-1	-1	-1	-1	-1	-1
19.6094	77.5	90.16	1	-1	1	-25.0134	10.0887	-1.48582	1.90625		-1	-1	0	0	-1	-1	-1	-1	-1	-1	-1
22.1875	86.1719	90.16	1	-1	1	-21.7214	12.7205	-0.762573	1.90625		-1	-1	0	0	-1	-1	-1	-1	-1	-1	-1
6.48438	72.1094	90.16	1	-1	1	-38.5322	10.7801	-1.89603	1.90625		-1	-1	0	0	-1	-1	-1	-1	-1	-1	-1
33.1719	43.9453	87.0491	1	-1	1	-14.1885	36.1458	-2.76795	1.90625		-1	-1	0	0	-1	-1	-1	-1	-1	-1	-1
43.5156	50.7813	95.06	1	-1	1	-3.6441	33.424	-2.48076	1.90625		-1	-1	0	0	-1	-1	-1	-1	-1	-1	-1
37.6563	52.6563	95.06	1	-1	1	-9.32132	31.2504	-2.45159	1.90625		-1	-1	0	0	-1	-1	-1	-1	-1	-1	-1
26.875	57.5781	95.06	1	-1	1	-19.6443	26.1321	-2.35469	1.90625		-1	-1	0	0	-1	-1	-1	-1	-1	-1	-1
16.3281	51.0156	95.06	1	-1	1	-30.6942	30.6935	-2.47369	1.90625		-1	-1	0	0	-1	-1	-1	-1	-1	-1	-1
1.5625	57.3438	95.06	1	-1	1	-44.8668	24.0025	-2.34397	1.90625		-1	-1	0	0	-1	-1	-1	-1	-1	-1	-1
13.2813	115.703	95.06	1	-1	1	-28.3194	40.5911	-0.206094	1.90625		-1	-1	0	0	-1	-1	-1	-1	-1	-1	-1
12.1094	99.7656	95.06	1	-1	1	-30.8188	26.4751	-0.422352	1.90625		-1	-1	0	0	-1	-1	-1	-1	-1	-1	-1
24.2969	108.203	95.06	1	-1	1	-17.9786	33.1107	-0.310926	1.90625		-1	-1	0	0	-1	-1	-1	-1	-1	-1	-1
9.29688	85	95.06	1	-1	1	-34.8536	16.3888	-0.927627	1.90625		-1	-1	0	0	-1	-1	-1	-1	-1	-1	-1
3.67188	79.6094	95.06	1	-1	1	-40.9049	14.5512	-1.22385	1.90625		-1	-1	0	0	-1	-1	-1	-1	-1	-1	-1
22.4219	85.2344	95.06	1	-1	1	-21.7659	16.4966	-0.989201	1.90625		-1	-1	0	0	-1	-1	-1	-1	-1	-1	-1
24.2969	97.1875	95.06	1	-1	1	-18.8996	23.8833	-0.523229	1.90625		-1	-1	0	0	-1	-1	-1	-1	-1	-1	-1
38.125	115.469	95.06	1	-1	1	-3.60295	38.8472	-0.252059	1.90625		-1	-1	0	0	-1	-1	-1	-1	-1	-1	-1
49.6094	119.453	95.06	1	-1	1	8.16479	41.7981	-0.233156	1.90625		-1	-1	0	0	-1	-1	-1	-1	-1	-1	-1
59.2188	122.5	95.06	1	-1	1	17.9873	44.0123	-0.221717	1.90625		-1	-1	0	0	-1	-1	-1	-1	-1	-1	-1
65.5469	122.969	95.06	1	-1	1	24.3272	44.0534	-0.227689	1.90625		-1	-1	0	0	-1	-1	-1	-1	-1	-1	-1
73.9844	125.078	95.06	1	-1	1	32.9045	45.4767	-0.222947	1.90625		-1	-1	0	0	-1	-1	-1	-1	-1	-1	-1
53.125	114.844	86.2287	1	-1	1	11.6393	34.4486	-0.054903	1.90625		-1	-1	0	0	-1	-1	-1	-1	-1	-1	-1
60.625	124.375	84.28	1	-1	1	19.983	42.8891	0.0275869	1.90625		-1	-1	0	0	-1	-1	-1	-1	-1	-1	-1
65.0781	123.906	81.8325	1	-1	1	24.4773	41.7945	0.0785102	1.90625		-1	-1	0	0	-1	-1	-1	-1	-1	-1	-1
71.1719	119.453	84.28	1	-1	1	30.0727	37.2364	-0.00512745	1.90625		-1	-1	0	0	-1	-1	-1	-1	-1	-1	-1
21.9531	108.203	83.3	1	-1	1	-19.8335	29.7824	0.0536006	1.90625		-1	-1	0	0	-1	-1	-1	-1	-1	-1	-1
92.0313	119.688	84.28	1	-1	1	50.3866	35.9681	-0.0368463	1.90625		-1	-1	0	0	2	-1	-1	-1	-1	-1	-1
86.7188	121.094	80.9944	1	-1	1	45.6229	37.2154	0.0661867	1.90625		-1	-1	0	0	2	-1	-1	-1	-1	-1	-1
72.1094	111.484	87.22	1	-1	1	30.2202	30.1512	-0.147907	1.90625		-1	-1	0	0	2	-1	-1	-1	-1	-1	-1
5.3125	77.5	80.36	1	-1	1	-38.8494	0.497593	0.854504	1.90625		-1	-1	0	0	-1	-1	-1	-1	-1	-1	-1
9.0625	68.125	80.36	1	-1	1	-35.8994	9.27343	-2.99462	1.90625		-1	-1	0	0	-1	-1	-1	-1	-1	-1	-1
9.84375	103.75	76.7756	1	-1	1	-31.9971	26.4131	0.305634	1.90625		-1	-1	0	0	-1	-1	-1	-1	-1	-1	-1
9.84375	117.813	81.9319	1	-1	1	-31.0313	40.2074	0.128869	1.90625		-1	-1	0	0	-1	-1	-1	-1	-1	-1	-1
9.84375	117.578	70.9162	1	-1	1	-30.6024	41.0413	0.399768	1.90625		-1	-1	0	0	-1	-1	-1	-1	-1	-1	-1
17.7344	57.5781	73.5	1	-1	1	-27.8677	21.5843	2.99218	1.90625		-1	-1	0	0	-1	-1	-1	-1	-1	-1	-1
11.1719	47.0313	73.5	1	-1	1	-35.2836	31.2696	3.08261	1.90625		-1	-1	0	0	-1	-1	-1	-1	-1	-1	-1
23.5938	44.2188	69.58	1	-1	1	-22.9911	35.8684	3.01362	1.90625		-1	-1	0	0	-1	-1	-1	-1	-1	-1	-1
43.75	38.8281	69.58	1	-1	1	-3.37289	42.4808	3.08018	1.90625		-1	-1	0	0	-1	-1	-1	-1	-1	-1	-1
49.1406	47.5	67.62	1	-1	1	2.7992	35.0717	2.97931	1.90625		-1	-1	0	0	-1	-1	-1	-1	-1	-1	-1
56.1719	46.0938	67.62	1	-1	1	9.68241	36.8743	3.00403	1.90625		-1	-1	0	0	-1	-1	-1	-1	-1	-1	-1
67.4219	51.4063	112.457	1	-1	1	19.5026	46.0241	-2.13781	1.90625		-1	-1	0	0	-1	-1	-1	-1	-1	-1	-1
156.953	33.9063	67.62	1	-1	1	114.329	52.418	-3.07236	1.90625		-1	-1	0	0	-1	-1	-1	-1	-1	-1	-1
165.391	32.2656	67.62	1	-1	1	122.849	53.8909	-3.05713	1.90625		-1	-1	0	0	-1	-1	-1	-1	-1	-1	-1
140.313	40	67.62	1	-1	1	97.0683	46.6109	-3.11394	1.90625		-1	-1	0	0	-1	-1	-1	-1	-1	-1	-1
129.063	40.4688	67.62	1	-1	1	85.1106	46.1733	-3.13519	1.90625		-1	-1	0	0	-1	-1	-1	-1	-1	-1	-1
117.344	42.1094	67.62	1	-1	1	72.5299	44.3873	3.1221	1.90625		-1	-1	0	0	-1	-1	-1	-1	-1	-1	-1
107.5	42.5781	67.62	1	-1	1	61.9219	43.6068	3.10433	1.90625		-1	-1	0	0	-1	-1	-1	-1	-1	-1	-1
91.5625	42.3438	67.62	1	-1	1	44.7964	42.9611	3.08255	1.90625		-1	-1	0	0	-1	-1	-1	-1	-1	-1	-1
148.984	132.578	65.66	1	-1	1	105.691	46.9802	0.318125	1.90625		-1	-1	0	0	-1	-1	-1	-1	-1	-1	-1
138.203	129.531	65.66	1	-1	1	95.3975	44.1214	0.349498	1.90625		-1	-1	0	0	-1	-1	-1	-1	-1	-1	-1
129.063	128.828	65.66	1	-1	1	86.7376	43.6653	0.369109	1.90625		-1	-1	0	0	-1	-1	-1	-1	-1	-1	-1
107.266	136.094	65.66	1	-1	1	66.5526	51.7558	0.36796	1.90625		-1	-1	0	0	-1	-1	-1	-1	-1	-1	-1
185.781	142.891	62.72	1	-1	1	142.225	57.6162	0.29031	1.90625		-1	-1	0	0	2	-1	-1	-1	-1	-1	-1
208.516	145	62.72	1	-1	1	165.593	59.6228	0.265211	1.90625		-1	-1	0	0	2	-1	-1	-1	-1	-1	-1
221.875	145	62.72	1	-1	1	179.436	59.4433	0.257048	1.90625		-1	-1	0	0	-1	-1	-1	-1	-1	-1	-1
235.938	146.172	62.72	1	-1	1	194.034	60.3048	0.249482	1.90625		-1	-1	0	0	-1	-1	-1	-1	-1	-1	-1
248.359	146.172	62.72	1	-1	1	206.885	59.9374	0.24645	1.90625		-1	-1	0	0	-1	-1	-1	-1	-1	-1	-1
274.844	145.703	62.72	1	-1	1	234.135	58.4075	0.245898	1.90625		-1	-1	0	0	-1	-1	-1	-1	-1	-1	-1
198.438	143.828	65.66	1	-1	1	155.021	58.2613	0.225415	1.90625		-1	-1	0	0	-1	-1	-1	-1	-1	-1	-1
192.813	142.422	65.66	1	-1	1	149.233	56.8589	0.232516	1.90625		-1	-1	0	0	-1	-1	-1	-1	-1	-1	-1
122.344	132.578	104.901	1	-1	1	77.7652	55.2573	-0.403687	1.90625		-1	-1	0	0	-1	-1	-1	-1	-1	-1	-1
161.406	124.141	38.22	1	-1	1	120.043	50.8675	0.884892	1.90625		-1	-1	0	0	-1	-1	-1	-1	-1	-1	-1
145.703	122.266	38.22	1	-1	1	104.841	50.2662	0.931009	1.90625		-1	-1	0	0	-1	-1	-1	-1	-1	-1	-1
141.016	117.578	38.22	1	-1	1	100.318	47.3015	1.00632	1.90625		-1	-1	0	0	-1	-1	-1	-1	-1	-1	-1
122.5	111.016	38.22	1	-1	1	82.1861	44.5772	1.13638	1.90625		-1	-1	0	0	-1	-1	-1	-1	-1	-1	-1
110.078	110.078	38.22	1	-1	1	69.8882	45.0294	1.15765	1.90625		-1	-1	0	0	-1	-1	-1	-1	-1	-1	-1
103.75	108.672	38.22	1	-1	1	63.5354	44.7845	1.18344	1.90625		-1	-1	0	0	-1	-1	-1	-1	-1	-1	-1
99.2969	103.047	38.22	1	-1	1	58.7648	42.4717	1.29472	1.90625		-1	-1	0	0	-1	-1	-1	-1	-1	-1	-1
201.484	132.109	40.18	1	-1	1	159.482	54.7797	0.720265	1.90625		-1	-1	0	0	-1	-1	-1	-1	-1	-1	-1
194.922	130.938	40.18	1	-1	1	152.906	53.9714	0.737346	1.90625		-1	-1	0	0	-1	-1	-1	-1	-1	-1	-1
185.547	129.531	40.18	1	-1	1	143.567	53.0661	0.761255	1.90625		-1	-1	0	0	-1	-1	-1	-1	-1	-1	-1
178.516	129.766	40.18	1	-1	1	136.597	53.4672	0.766748	1.90625		-1	-1	0	0	-1	-1	-1	-1	-1	-1	-1
168.438	127.188	40.18	1	-1	1	126.715	51.709	0.808285	1.90625		-1	-1	0	0	-1	-1	-1	-1	-1	-1	-1
215.547	131.875	40.18	1	-1	1	173.637	54.1867	0.713635	1.90625		-1	-1	0	0	-1	-1	-1	-1	-1	-1	-1
227.031	132.109	40.18	1	-1	1	185.234	54.0426	0.706864	1.90625		-1	-1	0	0	-1	-1	-1	-1	-1	-1	-1
257.031	136.563	41.16	1	-1	1	215.711	56.4067	0.650135	1.90625		-1	-1	0	0	-1	-1	-1	-1	-1	-1	-1
273.203	136.563	41.16	1	-1	1	232.085	55.7636	0.654331	1.90625		-1	-1	0	0	-1	-1	-1	-1	-1	-1	-1
243.203	136.094	41.16	1	-1	1	201.677	56.492	0.653203	1.90625		-1	-1	0	0	2	-1	-1	-1	-1	-1	-1
223.984	136.094	44.6662	1	-1	1	182.075	55.5232	0.601303	1.90625		-1	-1	0	0	-1	-1	-1	-1	-1	-1	-1
210.391	137.031	43.4944	1	-1	1	168.331	57.2359	0.619552	1.90625		-1	-1	0	0	-1	-1	-1	-1	-1	-1	-1
120.156	123.672	49	1	-1	1	79.4053	46.0094	0.770318	1.90625		-1	-1	0	0	-1	-1	-1	-1	-1	-1	-1
116.641	117.578	49	1	-1	1	75.8453	41.4083	0.858423	1.90625		-1	-1	0	0	-1	-1	-1	-1	-1	-1	-1
100.938	111.25	49	1	-1	1	60.2501	38.0153	0.974733	1.90625		-1	-1	0	0	-1	-1	-1	-1	-1	-1	-1
164.922	128.828	49	1	-1	1	122.572	48.4586	0.647454	1.90625		-1	-1	0	0	2	-1	-1	-1	-1	-1	-1
182.813	133.047	47.7131	1	-1	1	140.321	52.4126	0.607332	1.90625		-1	-1	0	0	2	-1	-1	-1	-1	-1	-1
194.453	134.922	49	1	-1	1	151.921	53.3785	0.557623	1.90625		-1	-1	0	0	2	-1	-1	-1	-1	-1	-1
197.813	137.969	52.4006	1	-1	1	155.125	54.9946	0.475933	1.90625		-1	-1	0	0	2	-1	-1	-1	-1	-1	-1
210	139.609	49.3537	1	-1	1	167.694	57.3205	0.508013	1.90625		-1	-1	0	0	2	-1	-1	-1	-1	-1	-1
223.594	140.078	49.8225	1	-1	1	181.572	57.2961	0.490236	1.90625		-1	-1	0	0	2	-1	-1	-1	-1	-1	-1
223.594	142.891	84.2756	1	-1	1	180.44	59.2204	-0.110167	1.90625		-1	-1	0	0	2	-1	-1	-1	-1	-1	-1
243.203	146.172	79.38	1	-1	1	201.224	60.9921	-0.0273702	1.90625		-1	-1	0	0	-1	-1	-1	-1	-1	-1	-1
250	144.297	79.38	1	-1	1	208.258	58.9716	-0.0355886	1.90625		-1	-1	0	0	-1	-1	-1	-1	-1	-1	-1
259.609	144.531	79.38	1	-1	1	218.263	58.889	-0.0373792	1.90625		-1	-1	0	0	-1	-1	-1	-1	-1	-1	-1
262.656	144.063	79.38	1	-1	1	221.406	58.3183	-0.0396762	1.90625		-1	-1	0	0	-1	-1	-1	-1	-1	-1	-1
275.078	143.125	79.38	1	-1	1	234.219	56.8853	-0.0453127	1.90625		-1	-1	0	0	-1	-1	-1	-1	-1	-1	-1
288.672	143.125	79.38	1	-1	1	248.226	56.2167	-0.0469063	1.90625		-1	-1	0	0	-1	-1	-1	-1	-1	-1	-1
304.844	150.625	79.38	1	-1	1	265.282	62.6296	-0.0222244	1.90625		-1	-1	0	0	-1	-1	-1	-1	-1	-1	-1
148.984	133.281	79.38	1	-1	1	104.565	47.5116	0.0273742	1.90625		-1	-1	0	0	-1	-1	-1	-1	-1	-1	-1
164.219	133.594	81.5412	1	-1	1	119.237	48.5345	-0.0415582	1.90625		-1	-1	0	0	-1	-1	-1	-1	-1	-1	-1
179.219	137.266	79.38	1	-1	1	134.442	52.1528	-0.00767056	1.90625		-1	-1	0	0	-1	-1	-1	-1	-1	-1	-1
186.016	138.203	79.38	1	-1	1	141.395	53.2277	-0.0130028	1.90625		-1	-1	0	0	-1	-1	-1	-1	-1	-1	-1
198.203	142.891	79.38	1	-1	1	154.005	58.0466	-0.010998	1.90625		-1	-1	0	0	-1	-1	-1	-1	-1	-1	-1
185.625	141.484	69.0412	1	-1	1	141.658	55.7298	0.181247	1.90625		-1	-1	0	0	-1	-1	-1	-1	-1	-1	-1
98.5938	121.797	80.36	1	-1	1	56.8859	37.0753	0.0662682	1.90625		-1	-1	0	0	2	-1	-1	-1	-1	-1	-1
73.5938	95.0781	45.6037	1	-1	1	32.0205	34.4419	1.37489	1.90625		-1	-1	0	0	-1	-1	-1	-1	-1	-1	-1
73.5938	90.3906	44.6662	1	-1	1	31.6668	34.0073	1.51355	1.90625		-1	-1	0	0	-1	-1	-1	-1	-1	-1	-1
73.5938	84.7656	45.135	1	-1	1	31.1774	32.7728	1.67798	1.90625		-1	-1	0	0	-1	-1	-1	-1	-1	-1	-1
73.5938	73.9844	43.9631	1	-1	1	30.3237	35.0556	1.99123	1.90625		-1	-1	0	0	-1	-1	-1	-1	-1	-1	-1
73.5938	68.125	45.6037	1	-1	1	29.767	35.4807	2.16312	1.90625		-1	-1	0	0	-1	-1	-1	-1	-1	-1	-1
73.5938	63.2031	39.7444	1	-1	1	29.594	42.903	2.21074	1.90625		-1	-1	0	0	-1	-1	-1	-1	-1	-1	-1
73.5938	107.734	29.6662	1	-1	1	33.7275	54.112	1.26071	1.90625		-1	-1	0	0	-1	-1	-1	-1	-1	-1	-1
73.5938	117.109	49.8225	1	-1	1	33.6908	44.106	0.852503	1.90625		-1	-1	0	0	-1	-1	-1	-1	-1	-1	-1
73.5938	124.375	65.0569	1	-1	1	33.6781	43.2797	0.465061	1.90625		-1	-1	0	0	-1	-1	-1	-1	-1	-1	-1
73.5938	136.328	83.1037	1	-1	1	33.9428	53.5652	0.0671567	1.90625		-1	-1	0	0	-1	-1	-1	-1	-1	-1	-1
73.5938	125.547	119.666	1	-1	1	31.5531	59.7104	-0.610696	1.90625		-1	-1	0	0	-1	-1	-1	-1	-1	-1	-1
75.2031	45.1563	38.8069	1	-1	1	29.7257	54.3176	2.50461	1.90625		-1	-1	0	0	-1	-1	-1	-1	-1	-1	-1
66.6094	57.3438	71.6194	1	-1	1	20.8525	25.7005	3.04856	1.90625		-1	-1	0	0	-1	-1	-1	-1	-1	-1	-1
65.625	52.6563	79.8225	1	-1	1	19.1465	29.4576	-2.92229	1.90625		-1	-1	0	0	-1	-1	-1	-1	-1	-1	-1
71.875	52.1875	80.36	1	-1	1	25.3084	30.4957	-2.89812	1.90625		-1	-1	0	0	-1	-1	-1	-1	-1	-1	-1
78.9063	51.0156	80.36	1	-1	1	32.2112	32.2684	-2.89354	1.90625		-1	-1	0	0	-1	-1	-1	-1	-1	-1	-1
58.2813	54.5313	80.36	1	-1	1	11.9695	26.9931	-2.9085	1.90625		-1	-1	0	0	-1	-1	-1	-1	-1	-1	-1
99.375	44.6875	80.9944	1	-1	1	52.5982	40.3154	-2.87306	1.90625		-1	-1	0	0	2	-1	-1	-1	-1	-1	-1
110.313	49.6094	59.78	1	-1	1	65.864	39.4111	2.87751	1.90625		-1	-1	0	0	2	-1	-1	-1	-1	-1	-1
157.5	105.859	39.0412	2	-1	1	116.395	38.6388	1.19436	1.90625		-1	-1	0	0	-1	-1	-1	-1	-1	-1	-1
159.297	77.5	34.3	2	-1	1	118.88	38.7263	1.95387	1.90625		-1	-1	0	0	-1	-1	-1	-1	-1	-1	-1
154.141	75.3906	34.3	2	-1	1	113.83	39.6707	2.00477	1.90625		-1	-1	0	0	-1	-1	-1	-1	-1	-1	-1
141.25	76.7969	34.3	2	-1	1	100.948	40.394	1.96619	1.90625		-1	-1	0	0	-1	-1	-1	-1	-1	-1	-1
172.188	76.0938	34.3	2	-1	1	131.459	38.0516	1.99171	1.90625		-1	-1	0	0	-1	-1	-1	-1	-1	-1	-1
179.453	76.0938	34.3	2	-1	1	138.486	37.5333	1.99333	1.90625		-1	-1	0	0	-1	-1	-1	-1	-1	-1	-1
153.203	85	35.28	2	-1	1	112.72	37.3132	1.76147	1.90625		-1	-1	0	0	-1	-1	-1	-1	-1	-1	-1
147.109	84.7656	35.28	2	-1	1	106.693	37.8362	1.76861	1.90625		-1	-1	0	0	-1	-1	-1	-1	-1	-1	-1
138.672	84.7656	35.28	2	-1	1	98.2617	38.5525	1.76866	1.90625		-1	-1	0	0	-1	-1	-1	-1	-1	-1	-1
128.125	85.2344	38.5725	2	-1	1	87.3166	36.1285	1.75612	1.90625		-1	-1	0	0	-1	-1	-1	-1	-1	-1	-1
161.172	96.25	35.28	2	-1	1	120.4	38.041	1.45974	1.90625		-1	-1	1	0	-1	-1	-1	-1	-1	-1	-1
152.5	91.3281	37.635	2	-1	1	111.768	35.392	1.58418	1.90625		-1	-1	1	0	-1	-1	-1	-1	-1	-1	-1
144.422	92.6563	38.8069	2	-1	1	103.683	35.1238	1.54641	1.90625		-1	-1	1	0	-1	-1	-1	-1	-1	-1	-1
160.781	65.0781	35.0569	2	-1	1	120.434	42.4308	2.24741	1.90625		-1	-1	1	0	-1	-1	-1	-1	-1	-1	-1
179.688	115	18.62	1	-1	1	139.345	59.5414	1.21925	1.90625		-1	-1	0	0	-1	-1	-1	-1	-1	-1	-1
188.359	114.766	18.62	1	-1	1	147.751	58.9808	1.21714	1.90625		-1	-1	0	0	-1	-1	-1	-1	-1	-1	-1
194.219	115.234	18.62	1	-1	1	153.444	58.9339	1.20702	1.90625		-1	-1	0	0	-1	-1	-1	-1	-1	-1	-1
200.781	115.234	18.62	1	-1	1	159.838	58.6394	1.204	1.90625		-1	-1	0	0	-1	-1	-1	-1	-1	-1	-1
212.5	115.234	18.62	1	-1	1	171.296	58.1555	1.20026	1.90625		-1	-1	0	0	-1	-1	-1	-1	-1	-1	-1
228.438	114.297	18.62	1	-1	1	186.932	57.0992	1.21289	1.90625		-1	-1	0	0	-1	-1	-1	-1	-1	-1	-1
229.609	121.797	18.62	1	-1	1	188.233	61.128	1.10606	1.90625		-1	-1	0	0	-1	-1	-1	-1	-1	-1	-1
171.484	110.313	23.52	1	-1	1	131.123	53.4772	1.25761	1.90625		-1	-1	1	0	-1	-1	-1	-1	-1	-1	-1
185.078	58.0469	23.52	1	-1	1	144.705	54.2481	2.26744	1.90625		-1	-1	0	0	-1	-1	-1	-1	-1	-1	-1
176.641	60.625	23.52	1	-1	1	136.663	53.5085	2.22167	1.90625		-1	-1	0	0	-1	-1	-1	-1	-1	-1	-1
168.906	61.0938	23.52	1	-1	1	129.254	53.8286	2.21037	1.90625		-1	-1	0	0	-1	-1	-1	-1	-1	-1	-1
149.922	61.3281	23.52	1	-1	1	110.684	55.1846	2.19735	1.90625		-1	-1	0	0	-1	-1	-1	-1	-1	-1	-1
146.641	63.9063	23.52	1	-1	1	107.373	54.3383	2.15317	1.90625		-1	-1	0	0	-1	-1	-1	-1	-1	-1	-1
137.031	66.0156	23.52	1	-1	1	97.584	54.276	2.11226	1.90625		-1	-1	0	0	-1	-1	-1	-1	-1	-1	-1
135.391	71.4063	23.52	1	-1	1	95.9092	52.6413	2.01609	1.90625		-1	-1	0	0	-1	-1	-1	-1	-1	-1	-1
142.891	69.7656	23.52	1	-1	1	103.556	52.521	2.04924	1.90625		-1	-1	0	0	-1	-1	-1	-1	-1	-1	-1
145.469	74.4531	23.52	1	-1	1	106.124	51.0323	1.96302	1.90625		-1	-1	0	0	-1	-1	-1	-1	-1	-1	-1
135.391	75.625	23.52	1	-1	1	95.9239	51.6149	1.93761	1.90625		-1	-1	0	0	-1	-1	-1	-1	-1	-1	-1
155.547	72.3438	23.52	1	-1	1	116.132	50.7181	2.00551	1.90625		-1	-1	0	0	-1	-1	-1	-1	-1	-1	-1
158.359	68.5938	23.52	1	-1	1	118.933	51.6317	2.076	1.90625		-1	-1	0	0	-1	-1	-1	-1	-1	-1	-1
167.734	68.125	23.52	1	-1	1	128.036	51.0581	2.08746	1.90625		-1	-1	0	0	-1	-1	-1	-1	-1	-1	-1
164.453	51.9531	23.52	1	-1	1	125.077	58.9183	2.34639	1.90625		-1	-1	0	0	-1	-1	-1	-1	-1	-1	-1
131.875	60.8594	23.52	1	-1	1	92.193	56.772	2.19353	1.90625		-1	-1	0	0	-1	-1	-1	-1	-1	-1	-1
126.719	61.3281	23.52	1	-1	1	86.7422	56.9164	2.18208	1.90625		-1	-1	0	0	-1	-1	-1	-1	-1	-1	-1
107.5	57.8125	23.52	1	-1	1	65.7575	59.476	2.2163	1.90625		-1	-1	0	0	-1	-1	-1	-1	-1	-1	-1
92.5	90.3906	23.52	1	-1	1	51.7768	53.8188	1.62501	1.90625		-1	-1	0	0	-1	-1	-1	-1	-1	-1	-1
90.3906	96.9531	23.52	1	-1	1	50.0759	55.0443	1.50396	1.90625		-1	-1	0	0	-1	-1	-1	-1	-1	-1	-1
68.125	97.1875	23.52	1	-1	1	27.6508	56.4538	1.47216	1.90625		-1	-1	0	0	-1	-1	-1	-1	-1	-1	-1
71.1719	86.875	23.52	1	-1	1	29.8223	54.5682	1.65899	1.90625		-1	-1	0	0	-1	-1	-1	-1	-1	-1	-1
66.0156	76.5625	23.52	1	-1	1	23.8262	54.9386	1.83901	1.90625		-1	-1	0	0	-1	-1	-1	-1	-1	-1	-1
71.4063	70	23.52	1	-1	1	28.6448	55.8963	1.96423	1.90625		-1	-1	0	0	-1	-1	-1	-1	-1	-1	-1
88.5156	76.9531	20.76	1	-1	1	46.6766	56.9285	1.86178	1.90625		-1	-1	0	0	-1	-1	-1	-1	-1	-1	-1
120.391	108.906	23.52	1	-1	1	81.1729	56.5752	1.31475	1.90625		-1	-1	0	0	-1	-1	-1	-1	-1	-1	-1
96.0156	108.906	23.52	1	-1	1	56.6483	58.4802	1.30952	1.90625		-1	-1	0	0	-1	-1	-1	-1	-1	-1	-1
186.953	119.453	25.48	1	-1	1	145.942	55.89	1.08422	1.90625		-1	-1	0	0	-1	-1	-1	-1	-1	-1	-1
175.703	118.516	25.48	1	-1	1	134.98	55.8677	1.10715	1.90625		-1	-1	0	0	-1	-1	-1	-1	-1	-1	-1
166.563	116.406	25.48	1	-1	1	126.133	55.1581	1.14696	1.90625		-1	-1	0	0	-1	-1	-1	-1	-1	-1	-1
159.766	115.469	25.48	1	-1	1	119.56	55.0507	1.16779	1.90625		-1	-1	0	0	-1	-1	-1	-1	-1	-1	-1
117.813	77.3438	41.8325	2	-1	1	76.2656	34.7264	1.98006	1.90625		-1	-1	1	0	-1	-1	-1	-1	-1	-1	-1
123.438	77.7344	39.2	2	-1	1	82.3155	36.8105	1.95906	1.90625		-1	-1	0	0	-1	-1	-1	-1	-1	-1	-1
128.594	76.5625	39.2	2	-1	1	87.6171	36.7222	1.99499	1.90625		-1	-1	0	0	-1	-1	-1	-1	-1	-1	-1
133.516	76.5625	39.2	2	-1	1	92.668	36.3473	1.99916	1.90625		-1	-1	0	0	-1	-1	-1	-1	-1	-1	-1
140.313	76.5625	39.2	2	-1	1	99.5798	35.8035	2.00384	1.90625		-1	-1	0	0	-1	-1	-1	-1	-1	-1	-1
146.641	76.0156	36.385	2	-1	1	106.19	38.1282	2.00096	1.90625		-1	-1	0	0	-1	-1	-1	-1	-1	-1	-1
136.328	94.8438	39.2	2	-1	1	95.6073	35.8745	1.48807	1.90625		-1	-1	0	0	-1	-1	-1	-1	-1	-1	-1
132.578	94.1406	40.18	2	-1	1	91.7787	35.0693	1.50233	1.90625		-1	-1	0	0	-1	-1	-1	-1	-1	-1	-1
127.656	94.375	40.18	2	-1	1	86.8495	35.5265	1.4969	1.90625		-1	-1	0	0	-1	-1	-1	-1	-1	-1	-1
122.734	94.6094	40.18	2	-1	1	81.9033	35.9799	1.49059	1.90625		-1	-1	0	0	-1	-1	-1	-1	-1	-1	-1
117.813	94.1406	40.18	2	-1	1	76.9212	36.2615	1.50213	1.90625		-1	-1	0	0	-1	-1	-1	-1	-1	-1	-1
135.625	104.219	40.18	2	-1	1	94.8682	38.3933	1.24282	1.90625		-1	-1	0	0	-1	-1	-1	-1	-1	-1	-1
142.656	105.156	40.18	2	-1	1	101.781	38.3227	1.21414	1.90625		-1	-1	0	0	-1	-1	-1	-1	-1	-1	-1
150.156	105.156	40.18	2	-1	1	109.129	37.793	1.20491	1.90625		-1	-1	0	0	-1	-1	-1	-1	-1	-1	-1
143.359	98.125	40.18	2	-1	1	102.495	35.3209	1.38709	1.90625		-1	-1	0	0	-1	-1	-1	-1	-1	-1	-1
150.156	97.6563	38.8069	2	-1	1	109.307	35.9286	1.40576	1.90625		-1	-1	0	0	-1	-1	-1	-1	-1	-1	-1
157.188	65.3125	45.08	2	-1	1	116.076	34.2248	2.38301	1.90625		-1	-1	1	0	-1	-1	-1	-1	-1	-1	-1
150.156	68.125	45.08	2	-1	1	109.031	33.1259	2.30652	1.90625		-1	-1	0	0	-1	-1	-1	-1	-1	-1	-1
145.938	67.6563	45.08	2	-1	1	104.788	33.6977	2.31319	1.90625		-1	-1	0	0	-1	-1	-1	-1	-1	-1	-1
142.422	67.8906	45.08	2	-1	1	101.224	33.8275	2.30295	1.90625		-1	-1	0	0	-1	-1	-1	-1	-1	-1	-1
137.734	68.125	45.08	2	-1	1	96.439	34.0358	2.29096	1.90625		-1	-1	0	0	-1	-1	-1	-1	-1	-1	-1
132.344	68.3594	45.08	2	-1	1	90.8907	34.277	2.27756	1.90625		-1	-1	0	0	-1	-1	-1	-1	-1	-1	-1
128.125	68.3594	45.08	2	-1	1	86.5147	34.5427	2.27123	1.90625		-1	-1	0	0	-1	-1	-1	-1	-1	-1	-1
146.406	52.6563	51.94	2	-1	1	104.753	39.7087	2.73631	1.90625		-1	-1	0	0	-1	-1	-1	-1	-1	-1	-1
139.375	53.3594	51.94	2	-1	1	97.5003	39.4561	2.71437	1.90625		-1	-1	0	0	-1	-1	-1	-1	-1	-1	-1
172.891	50.0781	51.94	2	-1	1	131.203	40.5996	2.81091	1.90625		-1	-1	0	0	-1	-1	-1	-1	-1	-1	-1
180.625	50.0781	51.94	2	-1	1	138.727	40.2643	2.82202	1.90625		-1	-1	0	0	-1	-1	-1	-1	-1	-1	-1
152.969	115.703	53.9	2	-1	1	110.65	35.0124	0.726264	1.90625		-1	-1	0	0	-1	-1	-1	-1	-1	-1	-1
146.875	115.469	53.9	2	-1	1	104.717	35.0572	0.742914	1.90625		-1	-1	0	0	-1	-1	-1	-1	-1	-1	-1
134.688	115.938	53.9	2	-1	1	92.8993	36.0232	0.759418	1.90625		-1	-1	1	0	-1	-1	-1	-1	-1	-1	-1
92.7344	107.266	53.9	2	-1	1	51.6647	32.4264	0.95765	1.90625		-1	-1	0	0	-1	-1	-1	-1	-1	-1	-1
100.234	107.734	53.9	2	-1	1	59.0787	32.1292	0.949056	1.90625		-1	-1	0	0	-1	-1	-1	-1	-1	-1	-1
104.922	107.969	53.9	2	-1	1	63.6989	31.9149	0.943331	1.90625		-1	-1	0	0	-1	-1	-1	-1	-1	-1	-1
111.484	108.203	53.9	2	-1	1	70.1495	31.5671	0.935219	1.90625		-1	-1	0	0	-1	-1	-1	-1	-1	-1	-1
102.813	115	53.9	1	-1	1	62.0018	37.394	0.811112	1.90625		-1	-1	1	0	-1	-1	-1	-1	-1	-1	-1
68.5938	101.406	53.9	1	-1	1	27.2336	30.6386	1.07196	1.90625		-1	-1	0	0	-1	-1	-1	-1	-1	-1	-1
67.4219	95.7813	53.9	1	-1	1	25.5965	27.64	1.23052	1.90625		-1	-1	0	0	-1	-1	-1	-1	-1	-1	-1
59.0625	61.3281	52.8694	1	-1	1	14.4347	32.6732	2.405	1.90625		-1	-1	0	0	-1	-1	-1	-1	-1	-1	-1
59.0625	60.1563	44.9006	1	-1	1	14.6611	39.8547	2.30384	1.90625		-1	-1	0	0	-1	-1	-1	-1	-1	-1	-1
59.0625	58.2813	61.0725	1	-1	1	13.846	29.095	2.66467	1.90625		-1	-1	0	0	-1	-1	-1	-1	-1	-1	-1
59.0625	58.75	67.635	1	-1	1	13.6181	25.2751	2.86278	1.90625		-1	-1	0	0	-1	-1	-1	-1	-1	-1	-1
59.0625	39.2969	52.8694	1	-1	1	12.5927	49.4121	2.76128	1.90625		-1	-1	0	0	-1	-1	-1	-1	-1	-1	-1
57.3906	46.0938	82.635	1	-1	1	10.2847	35.4913	-2.86168	1.90625		-1	-1	0	0	-1	-1	-1	-1	-1	-1	-1
55.4688	75.8594	53.9	1	-1	1	12.0295	25.3178	1.95333	1.90625		-1	-1	0	0	-1	-1	-1	-1	-1	-1	-1
49.375	69.7656	53.9	1	-1	1	5.45267	27.3104	2.15174	1.90625		-1	-1	0	0	-1	-1	-1	-1	-1	-1	-1
40.9375	72.3438	55.86	1	-1	1	-2.8125	24.6147	2.05627	1.90625		-1	-1	0	0	-1	-1	-1	-1	-1	-1	-1
39.5313	77.2656	55.86	1	-1	1	-3.80115	23.5648	1.85174	1.90625		-1	-1	0	0	-1	-1	-1	-1	-1	-1	-1
24.0625	51.4844	55.86	1	-1	1	-21.3584	36.2882	2.58144	1.90625		-1	-1	0	0	-1	-1	-1	-1	-1	-1	-1
16.3281	59.4531	55.86	1	-1	1	-28.393	30.641	2.38641	1.90625		-1	-1	0	0	-1	-1	-1	-1	-1	-1	-1
65.5469	48.9063	53.9	1	-1	1	19.8104	41.1657	2.67418	1.90625		-1	-1	0	0	-1	-1	-1	-1	-1	-1	-1
75.1563	47.9688	53.9	1	-1	1	29.2998	42.3575	2.70594	1.90625		-1	-1	0	0	-1	-1	-1	-1	-1	-1	-1
83.125	46.5625	53.9	1	-1	1	37.1164	43.9038	2.73871	1.90625		-1	-1	0	0	-1	-1	-1	-1	-1	-1	-1
92.2656	46.5625	53.9	1	-1	1	46.5603	44.3368	2.75497	1.90625		-1	-1	0	0	-1	-1	-1	-1	-1	-1	-1
113.594	43.9844	53.9	1	-1	1	69.5627	47.0941	2.81876	1.90625		-1	-1	0	0	-1	-1	-1	-1	-1	-1	-1
126.016	43.9844	53.9	1	-1	1	83.0679	47.0256	2.83916	1.90625		-1	-1	0	0	-1	-1	-1	-1	-1	-1	-1
125.313	28.0469	53.9	1	-1	1	81.92	61.6975	2.9539	1.90625		-1	-1	0	0	-1	-1	-1	-1	-1	-1	-1
97.4219	31.7969	53.9	1	-1	1	50.9883	57.6605	2.89601	1.90625		-1	-1	0	0	-1	-1	-1	-1	-1	-1	-1
121.094	49.8438	53.9	1	-1	1	77.9185	41.9519	2.76763	1.90625		-1	-1	0	0	-1	-1	-1	-1	-1	-1	-1
74.2188	57.1094	53.9	1	-1	1	29.1306	35.1833	2.55679	1.90625		-1	-1	0	0	-1	-1	-1	-1	-1	-1	-1
50.5469	98.125	53.9	1	-1	1	8.99055	30.1936	1.1329	1.90625		-1	-1	0	0	-1	-1	-1	-1	-1	-1	-1
45.8594	111.25	53.9	1	-1	1	5.42072	39.5284	0.851492	1.90625		-1	-1	0	0	-1	-1	-1	-1	-1	-1	-1
79.375	121.094	53.9	1	-1	1	39.6141	44.4171	0.727462	1.90625		-1	-1	0	0	-1	-1	-1	-1	-1	-1	-1
86.875	121.563	53.9	1	-1	1	46.9735	44.1276	0.722856	1.90625		-1	-1	0	0	-1	-1	-1	-1	-1	-1	-1
96.0156	121.797	53.9	1	-1	1	55.8131	43.5398	0.718598	1.90625		-1	-1	0	0	2	-1	-1	-1	-1	-1	-1
118.047	122.891	56.0725	1	-1	1	76.8595	41.8131	0.644462	1.90625		-1	-1	1	0	-1	-1	-1	-1	-1	-1	-1
64.6875	71.1719	39.0412	1	-1	1	21.4213	40.6973	2.00743	1.90625		-1	-1	0	0	-1	-1	-1	-1	-1	-1	-1
64.6875	63.2031	40.6819	1	-1	1	20.6882	42.0528	2.20119	1.90625		-1	-1	0	0	-1	-1	-1	-1	-1	-1	-1
67.9688	79.375	36.2287	1	-1	1	25.4886	41.9691	1.80765	1.90625		-1	-1	0	0	-1	-1	-1	-1	-1	-1	-1
67.9688	115.938	49.3537	1	-1	1	28.0113	44.0209	0.874792	1.90625		-1	-1	0	0	-1	-1	-1	-1	-1	-1	-1
67.9688	122.5	40.6819	1	-1	1	28.913	54.6577	0.917028	1.90625		-1	-1	0	0	-1	-1	-1	-1	-1	-1	-1
69.8438	65.5469	56.6194	1	-1	1	25.3693	27.3318	2.40523	1.90625		-1	-1	0	0	-1	-1	-1	-1	-1	-1	-1
69.8438	76.7969	50.2912	1	-1	1	26.5675	28.327	1.93964	1.90625		-1	-1	0	0	-1	-1	-1	-1	-1	-1	-1
69.8438	81.4844	50.2912	1	-1	1	26.9594	27.748	1.774	1.90625		-1	-1	0	0	-1	-1	-1	-1	-1	-1	-1
69.8438	79.8438	44.1975	1	-1	1	27.0703	33.9286	1.81542	1.90625		-1	-1	0	0	-1	-1	-1	-1	-1	-1	-1
69.8438	75.1563	44.6662	1	-1	1	26.6593	34.1703	1.9533	1.90625		-1	-1	0	0	-1	-1	-1	-1	-1	-1	-1
69.8438	85.9375	37.1662	1	-1	1	27.866	40.968	1.65342	1.90625		-1	-1	0	0	-1	-1	-1	-1	-1	-1	-1
69.8438	109.609	42.0881	1	-1	1	29.6448	44.8521	1.0917	1.90625		-1	-1	0	0	-1	-1	-1	-1	-1	-1	-1
69.8438	113.359	57.0881	1	-1	1	29.3478	37.1139	0.763024	1.90625		-1	-1	0	0	-1	-1	-1	-1	-1	-1	-1
69.8438	109.141	59.9006	1	-1	1	28.8805	32.0654	0.764432	1.90625		-1	-1	0	0	-1	-1	-1	-1	-1	-1	-1
82.1875	50.0781	49.98	1	-1	1	36.6365	43.337	2.61692	1.90625		-1	-1	0	0	-1	-1	-1	-1	-1	-1	-1
70.4688	52.6563	49.98	1	-1	1	25.1841	40.9851	2.5527	1.90625		-1	-1	0	0	-1	-1	-1	-1	-1	-1	-1
62.9688	52.8906	49.98	1	-1	1	17.7362	40.5747	2.53265	1.90625		-1	-1	0	0	-1	-1	-1	-1	-1	-1	-1
53.3594	54.0625	49.98	1	-1	1	8.26644	39.4721	2.49057	1.90625		-1	-1	0	0	-1	-1	-1	-1	-1	-1	-1
69.2969	70.9375	52.4006	1	-1	1	25.4472	28.14	2.15816	1.90625		-1	-1	0	0	-1	-1	-1	-1	-1	-1	-1
70	88.9844	49.98	1	-1	1	27.7547	28.7329	1.51122	1.90625		-1	-1	0	0	-1	-1	-1	-1	-1	-1	-1
47.2656	86.1719	49.98	1	-1	1	4.88371	29.4601	1.54805	1.90625		-1	-1	0	0	-1	-1	-1	-1	-1	-1	-1
45.625	91.5625	49.98	1	-1	1	3.7009	31.0131	1.37316	1.90625		-1	-1	0	0	-1	-1	-1	-1	-1	-1	-1
51.25	86.875	49.98	1	-1	1	8.90961	29.3704	1.53473	1.90625		-1	-1	0	0	-1	-1	-1	-1	-1	-1	-1
44.2188	60.625	49.98	1	-1	1	-0.285897	35.1751	2.33121	1.90625		-1	-1	0	0	-1	-1	-1	-1	-1	-1	-1
42.8125	65.3125	49.98	1	-1	1	-1.29414	32.7729	2.20883	1.90625		-1	-1	0	0	-1	-1	-1	-1	-1	-1	-1
38.8281	49.8438	49.98	1	-1	1	-6.55457	41.9931	2.53277	1.90625		-1	-1	0	0	-1	-1	-1	-1	-1	-1	-1
59.9219	39.7656	49.98	1	-1	1	13.6052	50.6281	2.70901	1.90625		-1	-1	0	0	-1	-1	-1	-1	-1	-1	-1
80.5469	36.25	49.98	1	-1	1	33.8469	54.5995	2.77574	1.90625		-1	-1	0	0	-1	-1	-1	-1	-1	-1	-1
131.406	32.5	49.98	1	-1	1	89.0551	58.9719	2.8739	1.90625		-1	-1	0	0	-1	-1	-1	-1	-1	-1	-1
82.9688	92.0313	51.2287	2	-1	1	40.8712	27.5257	1.42766	1.90625		-1	-1	0	0	2	-1	-1	-1	-1	-1	-1
87.3438	92.5	49.98	2	-1	1	45.3672	28.5724	1.43543	1.90625		-1	-1	0	0	2	-1	-1	-1	-1	-1	-1
76.875	78.4375	50.5256	2	-1	1	33.6959	27.6169	1.90632	1.90625		-1	-1	0	0	2	-1	-1	-1	-1	-1	-1
93.6719	92.7344	49.98	2	-1	1	51.7802	28.2178	1.4405	1.90625		-1	-1	0	0	-1	-1	-1	-1	-1	-1	-1
99.2969	92.2656	49.98	2	-1	1	57.4366	27.7006	1.46642	1.90625		-1	-1	0	0	-1	-1	-1	-1	-1	-1	-1
96.0156	99.7656	49.98	2	-1	1	54.6167	30.7917	1.22464	1.90625		-1	-1	0	0	-1	-1	-1	-1	-1	-1	-1
86.4063	100	49.98	2	-1	1	45.024	31.6564	1.20608	1.90625		-1	-1	0	0	-1	-1	-1	-1	-1	-1	-1
77.5	98.5938	49.98	2	-1	1	36.0256	31.6497	1.22999	1.90625		-1	-1	0	0	-1	-1	-1	-1	-1	-1	-1
78.6719	91.7969	49.98	2	-1	1	36.6242	28.9211	1.43845	1.90625		-1	-1	0	0	-1	-1	-1	-1	-1	-1	-1
77.2656	71.4063	49.98	2	-1	1	33.5192	30.1399	2.13575	1.90625		-1	-1	1	0	-1	-1	-1	-1	-1	-1	-1
118.516	110.078	50.96	2	-1	1	77.3049	34.4318	0.95284	1.90625		-1	-1	0	0	-1	-1	-1	-1	-1	-1	-1
100.938	77.5	44.1	2	-1	1	58.5424	33.3769	1.96154	1.90625		-1	-1	0	0	-1	-1	-1	-1	-1	-1	-1
105.156	76.7969	44.1	2	-1	1	62.8986	33.3619	1.99073	1.90625		-1	-1	0	0	-1	-1	-1	-1	-1	-1	-1
101.875	84.7656	44.1	2	-1	1	59.9546	32.4529	1.74411	1.90625		-1	-1	0	0	-1	-1	-1	-1	-1	-1	-1
106.563	84.7656	44.1	2	-1	1	64.7796	32.1731	1.75209	1.90625		-1	-1	0	0	-1	-1	-1	-1	-1	-1	-1
117.344	70.2344	44.1	2	-1	1	75.3654	35.1002	2.19297	1.90625		-1	-1	0	0	-1	-1	-1	-1	-1	-1	-1
122.266	70.4688	44.1	2	-1	1	80.5284	34.7313	2.19514	1.90625		-1	-1	0	0	-1	-1	-1	-1	-1	-1	-1
80.7813	73.75	43.12	1	-1	1	37.4948	35.8061	2.00994	1.90625		-1	-1	0	0	-1	-1	-1	-1	-1	-1	-1
78.4375	67.8906	43.12	1	-1	1	34.6713	37.828	2.15349	1.90625		-1	-1	0	0	-1	-1	-1	-1	-1	-1	-1
75.625	85.4688	43.12	1	-1	1	33.3407	34.7315	1.66596	1.90625		-1	-1	0	0	-1	-1	-1	-1	-1	-1	-1
86.875	65.3125	44.1	1	-1	1	42.8715	38.116	2.24634	1.90625		-1	-1	0	0	-1	-1	-1	-1	-1	-1	-1
88.0469	62.9688	44.1	1	-1	1	43.9074	39.3243	2.30101	1.90625		-1	-1	0	0	-1	-1	-1	-1	-1	-1	-1
85.2344	69.0625	44.1	1	-1	1	41.4968	36.4344	2.15244	1.90625		-1	-1	0	0	-1	-1	-1	-1	-1	-1	-1
95.5469	65.5469	44.1	1	-1	1	52.0632	37.9798	2.26145	1.90625		-1	-1	0	0	-1	-1	-1	-1	-1	-1	-1
98.3594	62.0313	44.1	1	-1	1	54.802	39.8517	2.34363	1.90625		-1	-1	0	0	-1	-1	-1	-1	-1	-1	-1
112.656	61.0938	44.1	1	-1	1	70.0382	40.1614	2.39058	1.90625		-1	-1	1	0	-1	-1	-1	-1	-1	-1	-1
119.688	51.7188	43.12	1	-1	1	77.3236	47.0006	2.54668	1.90625		-1	-1	0	0	-1	-1	-1	-1	-1	-1	-1
129.766	52.4219	43.12	1	-1	1	88.1635	46.1088	2.55141	1.90625		-1	-1	0	0	-1	-1	-1	-1	-1	-1	-1
136.328	51.9531	43.12	1	-1	1	95.0923	46.1305	2.56754	1.90625		-1	-1	0	0	-1	-1	-1	-1	-1	-1	-1
105.391	52.8906	43.12	1	-1	1	61.8439	46.4113	2.50581	1.90625		-1	-1	0	0	-1	-1	-1	-1	-1	-1	-1
97.8906	52.8906	43.12	1	-1	1	53.7013	46.3994	2.49254	1.90625		-1	-1	0	0	-1	-1	-1	-1	-1	-1	-1
81.7188	55.2344	43.12	1	-1	1	36.8802	44.5577	2.42261	1.90625		-1	-1	0	0	-1	-1	-1	-1	-1	-1	-1
70.4688	56.6406	43.12	1	-1	1	25.7965	43.4756	2.37417	1.90625		-1	-1	0	0	-1	-1	-1	-1	-1	-1	-1
107.5	115	43.12	1	-1	1	67.2382	44.3322	1.00375	1.90625		-1	-1	0	0	-1	-1	-1	-1	-1	-1	-1
99.7656	114.766	43.12	1	-1	1	59.6345	44.7987	1.00815	1.90625		-1	-1	0	0	-1	-1	-1	-1	-1	-1	-1
118.516	120.625	43.12	1	-1	1	78.1698	47.4323	0.910648	1.90625		-1	-1	0	0	-1	-1	-1	-1	-1	-1	-1
129.297	120.859	43.12	1	-1	1	88.5951	46.8748	0.897281	1.90625		-1	-1	0	0	-1	-1	-1	-1	-1	-1	-1
146.172	123.203	43.12	1	-1	1	104.885	47.6961	0.843099	1.90625		-1	-1	0	0	-1	-1	-1	-1	-1	-1	-1
152.031	124.609	43.12	1	-1	1	110.541	48.5264	0.816375	1.90625		-1	-1	0	0	-1	-1	-1	-1	-1	-1	-1
161.172	125.313	43.12	1	-1	1	119.413	48.7173	0.794052	1.90625		-1	-1	0	0	-1	-1	-1	-1	-1	-1	-1
168.672	127.188	43.12	1	-1	1	126.723	49.9856	0.761153	1.90625		-1	-1	0	0	-1	-1	-1	-1	-1	-1	-1
177.344	129.297	43.12	1	-1	1	135.24	51.4867	0.726534	1.90625		-1	-1	0	0	-1	-1	-1	-1	-1	-1	-1
97.4219	118.047	49	1	-1	1	57.2076	43.2507	0.860398	1.90625		-1	-1	0	0	-1	-1	-1	-1	-1	-1	-1
89.2188	117.109	49	1	-1	1	49.1472	43.2351	0.873768	1.90625		-1	-1	0	0	-1	-1	-1	-1	-1	-1	-1
80.7813	116.406	49	1	-1	1	40.8219	43.4529	0.880895	1.90625		-1	-1	0	0	-1	-1	-1	-1	-1	-1	-1
73.0469	103.75	49	1	-1	1	32.0628	35.5798	1.11014	1.90625		-1	-1	0	0	-1	-1	-1	-1	-1	-1	-1
66.4844	103.984	49	1	-1	1	25.5484	36.2571	1.09698	1.90625		-1	-1	0	0	-1	-1	-1	-1	-1	-1	-1
79.1406	104.219	49	1	-1	1	38.1694	35.3534	1.107	1.90625		-1	-1	0	0	-1	-1	-1	-1	-1	-1	-1
85.4688	104.219	49	1	-1	1	44.4685	34.8351	1.11476	1.90625		-1	-1	0	0	-1	-1	-1	-1	-1	-1	-1
62.2656	74.6875	49	1	-1	1	18.8984	30.2155	1.97656	1.90625		-1	-1	0	0	-1	-1	-1	-1	-1	-1	-1
71.6406	129.531	49	1	-1	1	32.8182	54.8426	0.719779	1.90625		-1	-1	0	0	-1	-1	-1	-1	-1	-1	-1
22.5	86.4063	54.2756	1	-1	1	-19.9299	26.8169	1.44053	1.90625		-1	-1	0	0	-1	-1	-1	-1	-1	-1	-1
22.5	94.375	43.26	1	-1	1	-18.8152	39.8777	1.3303	1.90625		-1	-1	0	0	-1	-1	-1	-1	-1	-1	-1
22.5	105.156	50.9944	1	-1	1	-18.2286	39.1889	0.994594	1.90625		-1	-1	0	0	-1	-1	-1	-1	-1	-1	-1
22.5	117.813	59.1975	1	-1	1	-17.5044	44.2223	0.65268	1.90625		-1	-1	0	0	-1	-1	-1	-1	-1	-1	-1
22.5	75.1563	37.1662	1	-1	1	-20.174	42.9185	1.8154	1.90625		-1	-1	0	0	-1	-1	-1	-1	-1	-1	-1
22.5	69.2969	39.51	1	-1	1	-20.7593	41.5016	1.96072	1.90625		-1	-1	0	0	-1	-1	-1	-1	-1	-1	-1
129.531	61.3281	49	2	-1	1	87.5432	35.6508	2.50066	1.90625		-1	-1	0	0	2	-1	-1	-1	-1	-1	-1
136.328	60.1563	49	2	-1	1	94.6175	36.1317	2.53576	1.90625		-1	-1	0	0	2	-1	-1	-1	-1	-1	-1
122.734	65.7813	49	2	-1	1	80.5061	33.0494	2.38981	1.90625		-1	-1	0	0	2	-1	-1	-1	-1	-1	-1
116.875	66.25	49	2	-1	1	74.3606	33.009	2.36659	1.90625		-1	-1	0	0	2	-1	-1	-1	-1	-1	-1
58.0156	95.3906	85.26	1	-1	1	14.9217	15.3772	-0.288891	1.90625		-1	-1	0	0	-1	-1	-1	-1	-1	-1	-1
30.125	90.2344	74.48	1	-1	1	-12.8403	12.1403	0.604813	1.90625		-1	-1	0	0	-1	-1	-1	-1	-1	-1	-1
21.2188	89.2969	76.5022	1	-1	1	-21.8687	11.357	0.479667	1.90625		-1	-1	0	0	-1	-1	-1	-1	-1	-1	-1
13.7188	85.3125	74.48	1	-1	1	-29.587	9.46866	0.829416	1.90625		-1	-1	0	0	-1	-1	-1	-1	-1	-1	-1
38.3281	100.547	74.48	1	-1	1	-3.81053	21.134	0.395716	1.90625		-1	-1	0	0	-1	-1	-1	-1	-1	-1	-1
21.4531	102.422	74.7444	1	-1	1	-20.4664	24.4255	0.381911	1.90625		-1	-1	0	0	-1	-1	-1	-1	-1	-1	-1
62.7031	124.219	74.48	1	-1	1	22.438	42.2996	0.255706	1.90625		-1	-1	0	0	-1	-1	-1	-1	-1	-1	-1
66.4531	117.422	74.48	1	-1	1	25.6035	35.2321	0.269663	1.90625		-1	-1	1	0	-1	-1	-1	-1	-1	-1	-1
71.8438	50.625	75.46	1	-1	1	25.3461	32.0693	-3.05483	1.90625		-1	-1	0	0	-1	-1	-1	-1	-1	-1	-1
76.0625	50.625	75.46	1	-1	1	29.5466	32.4079	-3.04868	1.90625		-1	-1	0	0	-1	-1	-1	-1	-1	-1	-1
35.9844	56.0156	75.46	1	-1	1	-9.90721	23.9346	3.13999	1.90625		-1	-1	0	0	-1	-1	-1	-1	-1	-1	-1
59.4219	71.4844	76.44	2	-1	1	14.6822	10.3445	3.10931	2		-1	-1	0	0	-1	-1	-1	-1	-1	-1	-1
63.1719	68.4375	76.44	2	-1	1	18.1612	13.6232	-3.11468	2		-1	-1	0	0	-1	-1	-1	-1	-1	-1	-1
65.75	65.625	76.44	2	-1	1	20.493	16.6063	-3.08343	2		-1	-1	0	0	-1	-1	-1	-1	-1	-1	-1
69.5	62.8125	76.44	2	-1	1	23.9916	19.6942	-3.05887	2		-1	-1	0	0	-1	-1	-1	-1	-1	-1	-1
66.6875	58.3594	76.44	1	-1	1	20.8189	23.8932	-3.04927	1.90625		-1	-1	0	0	-1	-1	-1	-1	-1	-1	-1
59.6563	59.7656	76.44	1	-1	1	13.9357	21.9347	-3.06889	1.90625		-1	-1	0	0	-1	-1	-1	-1	-1	-1	-1
53.7969	62.1094	76.44	1	-1	1	8.2977	19.15	-3.09489	1.90625		-1	-1	0	0	-1	-1	-1	-1	-1	-1	-1
47.4688	66.5625	76.44	1	-1	1	2.36932	14.2735	3.1293	1.90625		-1	-1	0	0	-1	-1	-1	-1	-1	-1	-1
55.2031	69.375	76.44	1	-1	1	10.3053	12.0953	3.12364	1.90625		-1	-1	0	0	-1	-1	-1	-1	-1	-1	-1
49.8125	71.7188	77.42	1	-1	1	5.09413	9.21773	-3.13349	1.90625		-1	-1	1	0	-1	-1	-1	-1	-1	-1	-1
58.4844	97.0313	75.46	2	-1	1	15.9246	15.6853	0.35963	1.90625		-1	-1	0	0	-1	-1	-1	-1	-1	-1	-1
54.2656	97.2656	75.46	1	-1	1	11.7437	16.2936	0.36303	1.90625		-1	-1	0	0	-1	-1	-1	-1	-1	-1	-1
48.6406	98.4375	75.46	1	-1	1	6.24103	17.9447	0.357592	1.90625		-1	-1	0	0	-1	-1	-1	-1	-1	-1	-1
50.5156	103.359	75.46	1	-1	1	8.51941	22.6114	0.314009	1.90625		-1	-1	0	0	-1	-1	-1	-1	-1	-1	-1
30.125	68.2031	79.38	1	-1	1	-14.8818	10.9607	-3.00273	1.90625		-1	-1	0	0	-1	-1	-1	-1	-1	-1	-1
26.8438	61.2891	76.9709	1	-1	1	-18.6288	17.8063	-3.13623	1.90625		-1	-1	0	0	-1	-1	-1	-1	-1	-1	-1
109.109	43.125	75.46	1	-1	1	63.1693	42.2633	-2.99646	1.90625		-1	-1	1	0	-1	-1	-1	-1	-1	-1	-1
78.1719	43.5938	75.46	1	-1	1	31.0589	39.5706	-3.03349	1.90625		-1	-1	0	0	-1	-1	-1	-1	-1	-1	-1
68.7969	44.0625	75.46	1	-1	1	21.7637	38.3467	-3.04531	1.90625		-1	-1	0	0	-1	-1	-1	-1	-1	-1	-1
55.6719	46.6406	75.46	1	-1	1	8.91115	34.7352	-3.06792	1.90625		-1	-1	0	0	-1	-1	-1	-1	-1	-1	-1
53.3281	37.9688	75.46	1	-1	1	5.85252	43.1599	-3.05235	1.90625		-1	-1	0	0	-1	-1	-1	-1	-1	-1	-1
77.9375	33.0469	75.46	1	-1	1	29.9437	50.0482	-3.02183	1.90625		-1	-1	0	0	-1	-1	-1	-1	-1	-1	-1
103.016	33.9844	75.46	1	-1	1	56.042	51.0417	-3.00006	1.90625		-1	-1	0	0	-1	-1	-1	-1	-1	-1	-1
122	31.1719	73.3381	1	-1	1	76.7403	54.7742	-3.01601	1.90625		-1	-1	0	0	-1	-1	-1	-1	-1	-1	-1
141.219	32.1094	75.46	1	-1	1	97.309	54.1204	-2.94937	1.90625		-1	-1	0	0	-1	-1	-1	-1	-1	-1	-1
156.688	29.5313	75.46	1	-1	1	113.44	56.668	-2.92778	1.90625		-1	-1	0	0	-1	-1	-1	-1	-1	-1	-1
175.672	27.4219	75.46	1	-1	1	132.523	58.629	-2.90406	1.90625		-1	-1	0	0	-1	-1	-1	-1	-1	-1	-1
186.922	31.1719	75.46	1	-1	1	143.524	54.8404	-2.88455	1.90625		-1	-1	0	0	-1	-1	-1	-1	-1	-1	-1
177.547	31.1719	70.9944	1	-1	1	134.641	54.6772	-2.97761	1.90625		-1	-1	0	0	-1	-1	-1	-1	-1	-1	-1
173.328	22.5	71.6975	1	-1	1	130.546	63.404	-2.97193	1.90625		-1	-1	0	0	-1	-1	-1	-1	-1	-1	-1
69.0313	99.375	75.46	3	-1	1	26.6217	17.0432	0.318316	1.85938		-1	-1	0	0	-1	-1	-1	-1	-1	-1	-1
79.4609	103.359	75.46	3	-1	1	37.3393	20.0605	0.27369	1.85938		-1	-1	0	0	-1	-1	-1	-1	-1	-1	-1
84.2656	104.414	75.46	3	-1	1	42.2035	20.6867	0.260824	1.85938		-1	-1	0	0	-1	-1	-1	-1	-1	-1	-1
89.8906	105.352	75.46	3	-1	1	47.7311	21.1508	0.24665	1.85938		-1	-1	0	0	-1	-1	-1	-1	-1	-1	-1
96.4531	106.641	75.46	3	-1	1	54.1683	21.9452	0.228391	1.85938		-1	-1	0	0	-1	-1	-1	-1	-1	-1	-1
101.727	108.164	75.46	3	-1	1	59.3463	23.119	0.212162	1.85938		-1	-1	0	0	-1	-1	-1	-1	-1	-1	-1
105.125	108.516	75.46	3	-1	1	62.6364	23.2716	0.203003	1.85938		-1	-1	0	0	-1	-1	-1	-1	-1	-1	-1
110.398	108.75	75.46	3	-1	1	67.719	23.2361	0.188474	1.85938		-1	-1	0	0	-1	-1	-1	-1	-1	-1	-1
116.961	109.57	75.46	3	-1	1	74.0559	23.7867	0.168726	1.85938		-1	-1	0	0	-1	-1	-1	-1	-1	-1	-1
74.6563	101.25	75.46	3	-1	1	32.3791	18.3953	0.294347	1.85938		-1	-1	0	0	2	-1	-1	-1	-1	-1	-1
118.484	119.297	75.46	2	-1	1	75.8189	33.4565	0.163168	1.85938		-1	-1	0	0	2	-1	-1	-1	-1	-1	-1
86.8438	57.5391	75.46	2	-1	1	40.8592	26.4025	-3.0483	1.85938		-1	-1	0	0	2	-1	-1	-1	-1	-1	-1
80.5156	60.4688	75.46	2	-1	1	34.8034	22.9872	-3.07022	1.85938		-1	-1	0	0	2	-1	-1	-1	-1	-1	-1
113.328	53.9063	75.46	2	-1	1	68.1957	31.6949	-2.99378	1.85938		-1	-1	0	0	2	-1	-1	-1	-1	-1	-1
140.516	51.9141	73.5	2	-1	1	96.7896	34.2883	-2.98964	1.85938		-1	-1	0	0	2	-1	-1	-1	-1	-1	-1
98.0938	127.5	80.36	1	-1	1	56.7511	42.7731	0.079794	1.85938		-1	-1	0	0	-1	-1	-1	-1	-1	-1	-1
89.8906	127.266	80.36	1	-1	1	49.0751	43.0631	0.0906418	1.85938		-1	-1	0	0	-1	-1	-1	-1	-1	-1	-1
83.5625	126.914	80.36	1	-1	1	43.1191	43.1848	0.0978251	1.85938		-1	-1	0	0	-1	-1	-1	-1	-1	-1	-1
74.3047	125.977	80.36	1	-1	1	33.8969	42.9996	0.106451	1.85938		-1	-1	0	0	-1	-1	-1	-1	-1	-1	-1
65.0469	48.5938	106.207	1	-1	1	17.1572	43.4925	-2.28016	1.85938		-1	-1	0	0	-1	-1	-1	-1	-1	-1	-1
61.1797	124.453	80.36	1	-1	1	20.7014	42.5505	0.118455	1.85938		-1	-1	0	0	-1	-1	-1	-1	-1	-1	-1
76.4141	136.523	80.36	1	-1	1	36.879	53.3233	0.116112	1.85938		-1	-1	0	0	-1	-1	-1	-1	-1	-1	-1
93.1719	137.578	82.7131	1	-1	1	52.692	53.3106	0.0571493	1.85938		-1	-1	0	0	-1	-1	-1	-1	-1	-1	-1
58.0156	133.477	80.36	1	-1	1	18.3055	51.7938	0.129202	1.85938		-1	-1	0	0	-1	-1	-1	-1	-1	-1	-1
87.5469	135.703	98	1	-1	1	46.7407	55.5809	-0.217102	1.85938		-1	-1	0	0	-1	-1	-1	-1	-1	-1	-1
58.4844	131.484	98	1	-1	1	17.8876	53.4718	-0.208519	1.85938		-1	-1	0	0	-1	-1	-1	-1	-1	-1	-1
34.2266	123.75	101.463	1	-1	1	-7.05276	49.2857	-0.297354	1.85938		-1	-1	0	0	-1	-1	-1	-1	-1	-1	-1
12.6641	115.547	98.98	1	-1	1	-29.1066	42.075	-0.293353	1.85938		-1	-1	0	0	-1	-1	-1	-1	-1	-1	-1
168.875	30	98.98	1	-1	1	123.894	62.3644	-2.52483	1.85938		-1	-1	0	0	-1	-1	-1	-1	-1	-1	-1
151.297	30.7031	98.98	1	-1	1	105.796	61.2763	-2.5425	1.85938		-1	-1	0	0	-1	-1	-1	-1	-1	-1	-1
118.719	30.9375	98.98	1	-1	1	71.205	59.5855	-2.57687	1.85938		-1	-1	0	0	-1	-1	-1	-1	-1	-1	-1
70.4375	36.5625	98.98	1	-1	1	21.8127	50.3519	-2.54837	1.85938		-1	-1	0	0	-1	-1	-1	-1	-1	-1	-1
53.7969	37.7344	98.98	1	-1	1	5.34219	47.7451	-2.53905	1.85938		-1	-1	0	0	-1	-1	-1	-1	-1	-1	-1
14.6563	51.0938	98.98	1	-1	1	-32.5119	32.5363	-2.36673	1.85938		-1	-1	0	0	-1	-1	-1	-1	-1	-1	-1
198.875	31.6406	75.46	1	-1	1	155.158	54.3834	-2.87057	1.85938		-1	-1	0	0	-1	-1	-1	-1	-1	-1	-1
212.234	29.0625	75.46	1	-1	1	168.094	57.0474	-2.86409	1.85938		-1	-1	0	0	-1	-1	-1	-1	-1	-1	-1
222.781	19.6875	75.46	1	-1	1	178.171	66.5137	-2.87428	1.85938		-1	-1	0	0	-1	-1	-1	-1	-1	-1	-1
149.188	132.656	82.32	1	-1	1	104.522	47.3773	-0.0361022	1.85938		-1	-1	0	0	-1	-1	-1	-1	-1	-1	-1
178.719	136.172	82.32	1	-1	1	133.731	51.6388	-0.0666099	1.85938		-1	-1	0	0	-1	-1	-1	-1	-1	-1	-1
115.313	140.859	80.135	1	-1	1	73.244	55.2979	0.0821061	1.85938		-1	-1	0	0	-1	-1	-1	-1	-1	-1	-1
114.969	137.109	91.14	1	-1	1	72.1005	53.6527	-0.128336	1.85938		-1	-1	0	0	-1	-1	-1	-1	-1	-1	-1
33.7578	42.5391	79.38	1	-1	1	-13.4105	36.8349	-2.98059	1.85938		-1	-1	0	0	-1	-1	-1	-1	-1	-1	-1
27.1875	55.5469	87.635	1	-1	1	-19.2008	24.581	-2.6524	1.85938		-1	-1	0	0	-1	-1	-1	-1	-1	-1	-1
38.0156	51.7188	82.8303	1	-1	1	-8.54404	28.2471	-2.85323	1.85938		-1	-1	0	0	-1	-1	-1	-1	-1	-1	-1
39.1484	62.6953	81.34	1	-1	1	-6.43774	17.3138	-2.85865	1.85938		-1	-1	0	0	-1	-1	-1	-1	-1	-1	-1
47.4688	59.0625	81.34	1	-1	1	1.54279	21.6396	-2.86659	1.85938		-1	-1	0	0	-1	-1	-1	-1	-1	-1	-1
19.6875	55.5469	79.5491	1	-1	1	-26.3391	22.7029	-3.00073	1.85938		-1	-1	0	0	-1	-1	-1	-1	-1	-1	-1
19.2266	102.539	65.66	1	-1	1	-22.3037	28.1122	0.7032	1.85938		-1	-1	0	0	-1	-1	-1	-1	-1	-1	-1
10.0469	91.6406	68.0647	1	-1	1	-32.4527	18.7354	0.887357	1.85938		-1	-1	0	0	-1	-1	-1	-1	-1	-1	-1
11.7188	69.9609	63.8459	1	-1	1	-32.429	18.2675	2.16979	1.85938		-1	-1	0	0	-1	-1	-1	-1	-1	-1	-1
12.5469	52.5	64.68	1	-1	1	-33.0983	29.6734	2.74853	1.85938		-1	-1	0	0	-1	-1	-1	-1	-1	-1	-1
26.2969	84.8438	61.9709	1	-1	1	-16.5933	18.7797	1.41433	1.85938		-1	-1	0	0	-1	-1	-1	-1	-1	-1	-1
25.7813	97.0313	56.5803	1	-1	1	-15.8683	29.43	1.0733	1.85938		-1	-1	0	0	-1	-1	-1	-1	-1	-1	-1
36.5625	100.43	55.1741	1	-1	1	-4.7924	31.7434	1.03031	1.85938		-1	-1	0	0	-1	-1	-1	-1	-1	-1	-1
34.8125	106.289	59.0412	1	-1	1	-6.20235	33.4779	0.819363	1.85938		-1	-1	0	0	-1	-1	-1	-1	-1	-1	-1
36.5625	103.945	69.4709	1	-1	1	-5.08046	26.0512	0.554893	1.85938		-1	-1	0	0	-1	-1	-1	-1	-1	-1	-1
26.2969	64.1406	43.12	1	-1	1	-17.5569	39.5464	2.11715	1.85938		-1	-1	0	0	-1	-1	-1	-1	-1	-1	-1
33.7969	56.0156	43.12	1	-1	1	-10.7687	43.3128	2.30811	1.85938		-1	-1	0	0	-1	-1	-1	-1	-1	-1	-1
55.0469	45.3906	43.12	1	-1	1	9.50084	50.481	2.52529	1.85938		-1	-1	0	0	-1	-1	-1	-1	-1	-1	-1
8.48438	73.2031	43.12	1	-1	1	-34.5345	37.6418	1.84719	1.85938		-1	-1	0	0	-1	-1	-1	-1	-1	-1	-1
7.23438	79.7656	43.12	1	-1	1	-35.2304	37.5214	1.67014	1.85938		-1	-1	0	0	-1	-1	-1	-1	-1	-1	-1
37.9688	109.141	46.0725	1	-1	1	-2.29343	44.1586	1.01541	1.85938		-1	-1	0	0	-1	-1	-1	-1	-1	-1	-1
37.9688	117.266	47.01	1	-1	1	-1.65228	49.2451	0.878993	1.85938		-1	-1	0	0	-1	-1	-1	-1	-1	-1	-1
61.2969	121.953	66.64	1	-1	1	21.1676	41.6458	0.450145	1.85938		-1	-1	0	0	-1	-1	-1	-1	-1	-1	-1
53.7969	121.953	66.64	1	-1	1	13.7001	42.3335	0.452913	1.85938		-1	-1	0	0	-1	-1	-1	-1	-1	-1	-1
46.6094	117.578	66.64	1	-1	1	6.17794	38.8367	0.487654	1.85938		-1	-1	0	0	-1	-1	-1	-1	-1	-1	-1
38.4844	113.516	66.64	1	-1	1	-2.25151	35.774	0.526318	1.85938		-1	-1	0	0	-1	-1	-1	-1	-1	-1	-1
29.7344	122.266	66.64	1	-1	1	-10.232	44.8397	0.459188	1.85938		-1	-1	0	0	-1	-1	-1	-1	-1	-1	-1
8.17188	96.9531	78.4	1	-1	1	-34.2962	19.6419	0.274726	1.85938		-1	-1	0	0	-1	-1	-1	-1	-1	-1	-1
7.85938	89.1406	50.96	1	-1	1	-34.1435	31.8068	1.35751	1.85938		-1	-1	0	0	-1	-1	-1	-1	-1	-1	-1
8.79688	80.0781	60.76	1	-1	1	-34.3667	19.928	1.60236	1.85938		-1	-1	0	0	-1	-1	-1	-1	-1	-1	-1
26.25	111.641	71.385	1	-1	1	-14.7828	33.6962	0.417294	1.85938		-1	-1	0	0	-1	-1	-1	-1	-1	-1	-1
26.25	125.391	86.0725	1	-1	1	-14.2311	46.7955	0.030757	1.85938		-1	-1	0	0	-1	-1	-1	-1	-1	-1	-1
27.5469	73.2031	67.62	1	-1	1	-16.552	13.4524	2.17915	1.85938		-1	-1	0	0	-1	-1	-1	-1	-1	-1	-1
32.2344	66.6406	67.62	1	-1	1	-12.4335	17.4582	2.55149	1.85938		-1	-1	0	0	-1	-1	-1	-1	-1	-1	-1
32.3438	72.2656	83.885	1	-1	1	-12.5164	8.28717	-2.43087	1.85938		-1	-1	0	0	-1	-1	-1	-1	-1	-1	-1
32.3438	68.5156	77.9475	1	-1	1	-12.5882	10.9568	-3.12568	1.85938		-1	-1	0	0	-1	-1	-1	-1	-1	-1	-1
38.9063	92.8906	69.1975	1	-1	1	-3.66	16.3631	0.828675	1.85938		-1	-1	0	0	-1	-1	-1	-1	-1	-1	-1
39.375	41.6406	62.9475	1	-1	1	-7.22379	41.5925	2.9026	1.85938		-1	-1	0	0	-1	-1	-1	-1	-1	-1	-1
50.1563	106.641	48.5725	1	-1	1	9.53047	39.6045	1.03212	1.85938		-1	-1	0	0	-1	-1	-1	-1	-1	-1	-1
50.1563	99.4531	44.8225	1	-1	1	9.08219	38.6497	1.23746	1.85938		-1	-1	0	0	-1	-1	-1	-1	-1	-1	-1
50.1563	83.2031	67.9475	1	-1	1	6.78218	11.1231	1.52672	1.85938		-1	-1	0	0	2	-1	-1	-1	-1	-1	-1
52.0313	67.8906	66.6975	1	-1	1	7.41969	17.8365	2.56268	1.85938		-1	-1	0	0	2	-1	-1	-1	-1	-1	-1
53.9063	93.5156	68.885	1	-1	1	11.34	15.6816	0.838415	1.85938		-1	-1	0	0	2	-1	-1	-1	-1	-1	-1
63.7969	101.406	69.58	2	-1	1	21.8192	21.1548	0.587936	2.28125		-1	-1	0	0	2	-1	-1	-1	-1	-1	-1
63.2813	115.391	64.8225	1	-1	1	22.6687	35.8722	0.549278	1.85938		-1	-1	0	0	2	-1	-1	-1	-1	-1	-1
64.1094	100.078	100.94	1	-1	1	20.7427	28.955	-0.734957	1.85938		-1	-1	0	0	2	-1	-1	-1	-1	-1	-1
52.0313	85.7031	95.4475	1	-1	1	7.73861	17.3181	-1.13322	1.85938		-1	-1	0	0	2	-1	-1	-1	-1	-1	-1
310.672	45.7031	89.18	2	-1	1	264.872	48.6139	-2.51852	1.85938		-1	-1	0	0	2	-1	-1	-1	-1	-1	-1
315.047	133.203	86.24	2	-1	1	274.694	47.2704	-0.234829	1.85938		-1	-1	0	0	2	-1	-1	-1	-1	-1	-1
323.484	132.891	86.24	2	-1	1	283.27	46.429	-0.239387	1.85938		-1	-1	0	0	2	-1	-1	-1	-1	-1	-1
295.359	130.078	86.24	2	-1	1	254.39	45.5729	-0.256223	1.85938		-1	-1	0	0	2	-1	-1	-1	-1	-1	-1
282.859	131.016	86.24	2	-1	1	241.625	47.0559	-0.243784	1.85938		-1	-1	0	0	2	-1	-1	-1	-1	-1	-1
225.359	37.5781	99.96	1	-1	1	180.111	57.7162	-2.40066	1.85938		-1	-1	0	0	2	-1	-1	-1	-1	-1	-1
215.359	143.203	92.12	1	-1	1	171.439	62.0553	-0.225901	1.85938		-1	-1	0	0	2	-1	-1	-1	-1	-1	-1
227.859	140.078	92.12	1	-1	1	184.625	59.1971	-0.252975	1.85938		-1	-1	0	0	2	-1	-1	-1	-1	-1	-1
246.922	140.156	92.3225	1	-1	1	204.685	59.112	-0.264483	1.85938		-1	-1	0	0	2	-1	-1	-1	-1	-1	-1
220.359	34.1406	78.4	1	-1	1	175.904	52.5966	-2.79118	1.85938		-1	-1	0	0	2	-1	-1	-1	-1	-1	-1
242.859	21.3281	64.68	1	-1	1	197.753	64.9814	-3.02807	1.85938		-1	-1	0	0	2	-1	-1	-1	-1	-1	-1
296.609	137.891	58.8	2	-1	1	255.93	50.0524	0.340142	1.85938		-1	-1	0	0	2	-1	-1	-1	-1	-1	-1
304.109	138.516	58.8	2	-1	1	263.583	50.2481	0.340961	1.85938		-1	-1	0	0	2	-1	-1	-1	-1	-1	-1
312.547	137.891	58.8	2	-1	1	272.101	49.1415	0.347118	1.85938		-1	-1	0	0	2	-1	-1	-1	-1	-1	-1
319.422	139.141	58.8	2	-1	1	279.146	49.951	0.346264	1.85938		-1	-1	0	0	2	-1	-1	-1	-1	-1	-1
328.797	139.141	58.8	2	-1	1	288.628	49.3595	0.351762	1.85938		-1	-1	0	0	2	-1	-1	-1	-1	-1	-1
337.234	139.766	58.8	2	-1	1	297.087	49.4304	0.354443	1.85938		-1	-1	0	0	2	-1	-1	-1	-1	-1	-1
351.297	138.828	58.8	2	-1	1	311.051	47.6127	0.366766	1.85938		-1	-1	0	0	2	-1	-1	-1	-1	-1	-1
290.984	133.516	58.8	2	-1	1	249.971	46.0566	0.354518	1.85938		-1	-1	0	0	2	-1	-1	-1	-1	-1	-1
284.734	132.891	58.8	2	-1	1	243.59	45.7627	0.355054	1.85938		-1	-1	0	0	2	-1	-1	-1	-1	-1	-1
253.484	40.0781	65.66	2	-1	1	208.526	46.5195	-3.02176	1.85938		-1	-1	0	0	2	-1	-1	-1	-1	-1	-1
246.922	40.0781	65.66	2	-1	1	202.154	46.3212	-3.02462	1.85938		-1	-1	0	0	2	-1	-1	-1	-1	-1	-1
225.984	41.6406	65.66	2	-1	1	181.89	44.3166	-3.03952	1.85938		-1	-1	0	0	2	-1	-1	-1	-1	-1	-1
230.984	40.7031	65.66	2	-1	1	186.717	45.3313	-3.03462	1.85938		-1	-1	0	0	2	-1	-1	-1	-1	-1	-1
295.984	41.9531	65.66	2	-1	1	250.046	46.5088	-3.01576	1.85938		-1	-1	0	0	2	-1	-1	-1	-1	-1	-1
304.422	41.0156	65.66	2	-1	1	258.249	47.9167	-3.01532	1.85938		-1	-1	0	0	2	-1	-1	-1	-1	-1	-1
312.859	41.3281	65.66	2	-1	1	266.526	48.1071	-3.01641	1.85938		-1	-1	0	0	2	-1	-1	-1	-1	-1	-1
321.609	43.2031	65.66	2	-1	1	275.216	46.788	-3.01946	1.85938		-1	-1	0	0	2	-1	-1	-1	-1	-1	-1
268.797	40.7031	65.66	2	-1	1	223.447	46.4569	-3.01755	1.85938		-1	-1	0	0	2	-1	-1	-1	-1	-1	-1
178.484	117.266	67.62	3	-1	1	134.788	31.5757	0.257924	1.85938		-1	-1	0	0	2	-1	-1	-1	-1	-1	-1
174.734	116.328	67.62	3	-1	1	131.041	30.6253	0.269872	1.85938		-1	-1	0	0	2	-1	-1	-1	-1	-1	-1
171.297	115.078	67.62	3	-1	1	127.624	29.3693	0.283424	1.85938		-1	-1	0	0	2	-1	-1	-1	-1	-1	-1
167.547	116.328	67.62	3	-1	1	123.875	30.596	0.288012	1.85938		-1	-1	0	0	2	-1	-1	-1	-1	-1	-1
164.422	114.453	67.62	3	-1	1	120.8	28.7312	0.305092	1.85938		-1	-1	0	0	2	-1	-1	-1	-1	-1	-1
160.047	115.078	67.62	3	-1	1	116.471	29.3476	0.314291	1.85938		-1	-1	0	0	2	-1	-1	-1	-1	-1	-1
293.172	123.203	67.62	3	-1	1	251.664	34.8106	0.16229	1.85938		-1	-1	0	0	2	-1	-1	-1	-1	-1	-1
300.359	124.453	67.62	3	-1	1	259.02	35.6537	0.164007	1.85938		-1	-1	0	0	2	-1	-1	-1	-1	-1	-1
307.547	124.766	67.62	3	-1	1	266.316	35.5393	0.166149	1.85938		-1	-1	0	0	2	-1	-1	-1	-1	-1	-1
313.797	124.766	67.62	3	-1	1	272.638	35.1523	0.168422	1.85938		-1	-1	0	0	2	-1	-1	-1	-1	-1	-1
214.109	55.3906	73.5	3	-1	1	170.188	30.7181	-2.82485	1.85938		-1	-1	0	0	2	-1	-1	-1	-1	-1	-1
208.797	56.0156	73.5	3	-1	1	164.971	30.0328	-2.82914	1.85938		-1	-1	0	0	2	-1	-1	-1	-1	-1	-1
316.297	47.8906	44.1	2	-1	1	270.047	47.9251	2.79498	1.85938		-1	-1	0	0	2	-1	-1	-1	-1	-1	-1
311.609	47.2656	44.1	2	-1	1	265.44	48.1934	2.79917	1.85938		-1	-1	0	0	2	-1	-1	-1	-1	-1	-1
303.797	48.2031	44.1	2	-1	1	257.882	46.9455	2.78563	1.85938		-1	-1	0	0	2	-1	-1	-1	-1	-1	-1
293.797	47.8906	44.1	2	-1	1	248.134	46.7079	2.78371	1.85938		-1	-1	0	0	2	-1	-1	-1	-1	-1	-1
285.672	47.2656	44.1	2	-1	1	240.209	46.877	2.78591	1.85938		-1	-1	0	0	2	-1	-1	-1	-1	-1	-1
276.922	46.6406	44.1	2	-1	1	231.694	47.0623	2.78752	1.85938		-1	-1	0	0	2	-1	-1	-1	-1	-1	-1
269.422	44.4531	44.1	2	-1	1	224.345	48.7009	2.80546	1.85938		-1	-1	0	0	2	-1	-1	-1	-1	-1	-1
264.109	46.0156	44.1	2	-1	1	219.274	47.172	2.78636	1.85938		-1	-1	0	0	2	-1	-1	-1	-1	-1	-1
259.734	45.0781	44.1	2	-1	1	215.017	47.8646	2.79333	1.85938		-1	-1	0	0	2	-1	-1	-1	-1	-1	-1
320.047	129.766	47.04	2	-1	1	278.985	44.8298	0.644656	1.85938		-1	-1	0	0	2	-1	-1	-1	-1	-1	-1
314.109	130.391	47.04	2	-1	1	273.052	45.6878	0.632876	1.85938		-1	-1	0	0	2	-1	-1	-1	-1	-1	-1
303.484	124.766	47.04	2	-1	1	262.016	41.2624	0.684292	1.85938		-1	-1	0	0	2	-1	-1	-1	-1	-1	-1
292.547	124.766	47.04	2	-1	1	251.013	41.7646	0.675134	1.85938		-1	-1	0	0	2	-1	-1	-1	-1	-1	-1
280.047	124.453	47.04	2	-1	1	238.408	42.0406	0.670376	1.85938		-1	-1	0	0	2	-1	-1	-1	-1	-1	-1
275.984	124.766	47.04	2	-1	1	234.328	42.4857	0.664605	1.85938		-1	-1	0	0	2	-1	-1	-1	-1	-1	-1
229.109	125.391	50.96	2	-1	1	186.891	43.0335	0.572765	1.85938		-1	-1	0	0	2	-1	-1	-1	-1	-1	-1
224.734	124.453	50.96	2	-1	1	182.441	42.3013	0.583688	1.85938		-1	-1	0	0	2	-1	-1	-1	-1	-1	-1
222.859	129.141	50.96	2	-1	1	180.613	46.6651	0.543377	1.85938		-1	-1	0	0	2	-1	-1	-1	-1	-1	-1
220.359	123.828	50.96	2	-1	1	178.002	41.8521	0.592309	1.85938		-1	-1	0	0	2	-1	-1	-1	-1	-1	-1
216.922	124.766	50.96	2	-1	1	174.534	42.7948	0.585356	1.85938		-1	-1	0	0	2	-1	-1	-1	-1	-1	-1
212.547	127.266	50.96	2	-1	1	170.126	45.1901	0.565615	1.85938		-1	-1	0	0	2	-1	-1	-1	-1	-1	-1
205.359	125.078	50.96	2	-1	1	162.842	43.3558	0.591838	1.85938		-1	-1	0	0	2	-1	-1	-1	-1	-1	-1
202.547	125.391	50.96	2	-1	1	160.003	43.7018	0.591608	1.85938		-1	-1	0	0	2	-1	-1	-1	-1	-1	-1
198.172	123.516	50.96	2	-1	1	155.594	42.103	0.615103	1.85938		-1	-1	0	0	2	-1	-1	-1	-1	-1	-1
194.109	123.516	50.96	2	-1	1	151.51	42.1911	0.619995	1.85938		-1	-1	0	0	2	-1	-1	-1	-1	-1	-1
190.672	124.141	50.96	2	-1	1	148.056	42.8245	0.6179	1.85938		-1	-1	0	0	2	-1	-1	-1	-1	-1	-1
187.547	124.453	50.96	2	-1	1	144.923	43.1699	0.618901	1.85938		-1	-1	0	0	2	-1	-1	-1	-1	-1	-1
323.484	116.641	26.46	2	-1	1	281.254	49.0793	1.16406	1.85938		-1	-1	0	0	2	-1	-1	-1	-1	-1	-1
315.672	116.016	26.46	2	-1	1	273.441	48.9244	1.16492	1.85938		-1	-1	0	0	2	-1	-1	-1	-1	-1	-1
307.859	115.703	26.46	2	-1	1	265.65	48.9418	1.16101	1.85938		-1	-1	0	0	2	-1	-1	-1	-1	-1	-1
299.422	116.016	26.46	2	-1	1	257.275	49.3222	1.14647	1.85938		-1	-1	0	0	2	-1	-1	-1	-1	-1	-1
333.797	116.641	26.46	2	-1	1	291.522	48.8497	1.17793	1.85938		-1	-1	0	0	2	-1	-1	-1	-1	-1	-1
315.047	66.0156	26.46	2	-1	1	269.728	47.4678	2.25631	1.85938		-1	-1	0	0	2	-1	-1	-1	-1	-1	-1
296.297	64.1406	26.46	2	-1	1	251.342	47.7216	2.27187	1.85938		-1	-1	0	0	2	-1	-1	-1	-1	-1	-1
286.609	64.1406	26.46	2	-1	1	241.922	47.4364	2.26277	1.85938		-1	-1	0	0	2	-1	-1	-1	-1	-1	-1
279.109	64.4531	26.46	2	-1	1	234.655	47.1006	2.25013	1.85938		-1	-1	0	0	2	-1	-1	-1	-1	-1	-1
273.484	64.1406	26.46	2	-1	1	229.187	47.1424	2.25086	1.85938		-1	-1	0	0	2	-1	-1	-1	-1	-1	-1
250.047	75.7031	26.46	2	-1	1	206.896	42.6391	1.99005	1.85938		-1	-1	0	0	2	-1	-1	-1	-1	-1	-1
245.359	73.8281	26.46	2	-1	1	202.299	43.1863	2.02837	1.85938		-1	-1	0	0	2	-1	-1	-1	-1	-1	-1
234.109	75.3906	26.46	2	-1	1	191.463	42.9259	1.98509	1.85938		-1	-1	0	0	2	-1	-1	-1	-1	-1	-1
230.359	76.3281	26.46	2	-1	1	187.862	42.7823	1.96137	1.85938		-1	-1	0	0	2	-1	-1	-1	-1	-1	-1
224.422	76.3281	26.46	2	-1	1	182.136	42.9319	1.95786	1.85938		-1	-1	0	0	2	-1	-1	-1	-1	-1	-1
220.359	76.9531	26.46	2	-1	1	178.231	42.918	1.94147	1.85938		-1	-1	0	0	2	-1	-1	-1	-1	-1	-1
215.359	76.3281	26.46	2	-1	1	173.414	43.2181	1.95326	1.85938		-1	-1	0	0	2	-1	-1	-1	-1	-1	-1
206.297	77.2656	26.46	2	-1	1	164.717	43.3851	1.92848	1.85938		-1	-1	0	0	2	-1	-1	-1	-1	-1	-1
200.984	77.5781	26.46	2	-1	1	159.622	43.5726	1.91981	1.85938		-1	-1	0	0	2	-1	-1	-1	-1	-1	-1
196.609	78.2031	26.46	2	-1	1	155.428	43.6841	1.90467	1.85938		-1	-1	0	0	2	-1	-1	-1	-1	-1	-1
191.609	77.5781	26.46	2	-1	1	150.638	44.0719	1.91772	1.85938		-1	-1	0	0	2	-1	-1	-1	-1	-1	-1
278.797	111.641	30.38	2	-1	1	236.544	44.1852	1.15855	1.85938		-1	-1	0	0	2	-1	-1	-1	-1	-1	-1
271.609	111.953	30.38	2	-1	1	229.412	44.5529	1.14666	1.85938		-1	-1	0	0	2	-1	-1	-1	-1	-1	-1
265.984	112.578	30.38	2	-1	1	223.845	45.0625	1.13105	1.85938		-1	-1	0	0	2	-1	-1	-1	-1	-1	-1
260.672	112.578	30.38	2	-1	1	218.563	45.2185	1.12773	1.85938		-1	-1	0	0	2	-1	-1	-1	-1	-1	-1
237.859	112.578	30.38	2	-1	1	195.905	45.9314	1.1192	1.85938		-1	-1	0	0	2	-1	-1	-1	-1	-1	-1
231.922	113.516	30.38	2	-1	1	190.037	46.6758	1.10215	1.85938		-1	-1	0	0	2	-1	-1	-1	-1	-1	-1
226.297	113.516	30.38	2	-1	1	184.461	46.8696	1.1023	1.85938		-1	-1	0	0	2	-1	-1	-1	-1	-1	-1
217.859	114.766	30.38	2	-1	1	176.124	47.9167	1.08257	1.85938		-1	-1	0	0	2	-1	-1	-1	-1	-1	-1
158.172	86.3281	35.28	2	-1	1	117.59	36.8863	1.72438	1.85938		-1	-1	0	0	2	-1	-1	-1	-1	-1	-1
203.484	60.0781	38.22	2	-1	1	161.439	40.1676	2.4237	1.85938		-1	-1	0	0	2	-1	-1	-1	-1	-1	-1
199.109	59.1406	38.22	2	-1	1	157.25	40.9369	2.4376	1.85938		-1	-1	0	0	2	-1	-1	-1	-1	-1	-1
179.109	58.8281	38.22	1	-1	1	138.076	42.1379	2.42596	1.85938		-1	-1	0	0	2	-1	-1	-1	-1	-1	-1
236.609	61.6406	12.74	1	-1	1	193.878	60.415	2.15141	1.85938		-1	-1	0	0	-1	-1	-1	-1	-1	-1	-1
260.672	61.9531	12.74	1	-1	1	216.847	60.2214	2.16134	1.85938		-1	-1	0	0	-1	-1	-1	-1	-1	-1	-1
281.297	63.5156	12.74	1	-1	1	236.745	59.8436	2.15217	1.85938		-1	-1	0	0	-1	-1	-1	-1	-1	-1	-1
302.859	62.8906	12.74	1	-1	1	257.563	60.6438	2.17862	1.85938		-1	-1	0	0	-1	-1	-1	-1	-1	-1	-1
323.797	63.8281	12.74	1	-1	1	277.947	60.9979	2.18238	1.85938		-1	-1	0	0	-1	-1	-1	-1	-1	-1	-1
334.422	54.4531	12.74	1	-1	1	287.664	66.0941	2.32006	1.85938		-1	-1	0	0	-1	-1	-1	-1	-1	-1	-1
329.422	55.7031	12.74	1	-1	1	282.892	65.1682	2.30025	1.85938		-1	-1	0	0	-1	-1	-1	-1	-1	-1	-1
355.047	55.0781	12.74	1	-1	1	308.263	66.8243	2.3271	1.85938		-1	-1	0	0	-1	-1	-1	-1	-1	-1	-1
300.672	122.891	12.74	1	-1	1	258.807	64.5481	1.17649	1.85938		-1	-1	0	0	-1	-1	-1	-1	-1	-1	-1
308.172	112.578	12.74	1	-1	1	265.634	59.6389	1.33064	1.85938		-1	-1	0	0	-1	-1	-1	-1	-1	-1	-1
322.859	123.203	12.74	1	-1	1	280.86	64.2114	1.19253	1.85938		-1	-1	0	0	-1	-1	-1	-1	-1	-1	-1
283.484	124.453	12.74	1	-1	1	241.823	65.8303	1.1438	1.85938		-1	-1	0	0	-1	-1	-1	-1	-1	-1	-1
329.422	134.766	12.74	1	-1	1	288.167	70.6503	1.05845	1.85938		-1	-1	0	0	-1	-1	-1	-1	-1	-1	-1
348.797	122.578	12.74	1	-1	1	306.657	63.3931	1.22837	1.85938		-1	-1	0	0	-1	-1	-1	-1	-1	-1	-1
340.359	111.328	12.74	1	-1	1	297.469	58.8468	1.38627	1.85938		-1	-1	0	0	-1	-1	-1	-1	-1	-1	-1
334.422	106.016	12.74	1	-1	1	291.182	57.2683	1.46628	1.85938		-1	-1	0	0	-1	-1	-1	-1	-1	-1	-1
298.484	101.641	12.74	1	-1	1	255.444	56.3135	1.50055	1.85938		-1	-1	0	0	-1	-1	-1	-1	-1	-1	-1
281.922	108.516	12.74	1	-1	1	239.491	58.5306	1.37108	1.85938		-1	-1	0	0	-1	-1	-1	-1	-1	-1	-1
267.859	106.641	12.74	1	-1	1	225.563	58.1429	1.39125	1.85938		-1	-1	0	0	-1	-1	-1	-1	-1	-1	-1
275.672	97.5781	12.74	1	-1	1	232.836	55.6684	1.55121	1.85938		-1	-1	0	0	-1	-1	-1	-1	-1	-1	-1
246.609	106.641	12.74	1	-1	1	204.709	58.634	1.38028	1.85938		-1	-1	0	0	-1	-1	-1	-1	-1	-1	-1
233.172	104.766	12.74	1	-1	1	191.529	58.3974	1.40651	1.85938		-1	-1	0	0	-1	-1	-1	-1	-1	-1	-1
279.422	115.703	13.72	1	-1	1	237.369	60.6259	1.25226	1.85938		-1	-1	0	0	-1	-1	-1	-1	-1	-1	-1
265.984	113.828	13.72	1	-1	1	224.007	60.0924	1.2715	1.85938		-1	-1	0	0	-1	-1	-1	-1	-1	-1	-1
255.047	113.828	13.72	1	-1	1	213.22	60.3736	1.26608	1.85938		-1	-1	0	0	-1	-1	-1	-1	-1	-1	-1
222.547	107.578	13.72	1	-1	1	181.197	58.8074	1.35421	1.85938		-1	-1	0	0	-1	-1	-1	-1	-1	-1	-1
214.109	106.641	13.72	1	-1	1	172.978	58.7885	1.36927	1.85938		-1	-1	0	0	-1	-1	-1	-1	-1	-1	-1
225.359	96.0156	13.72	1	-1	1	183.745	55.4895	1.54963	1.85938		-1	-1	0	0	-1	-1	-1	-1	-1	-1	-1
246.297	95.7031	13.72	1	-1	1	204.063	54.8523	1.56251	1.85938		-1	-1	0	0	-1	-1	-1	-1	-1	-1	-1
249.734	82.8906	13.72	1	-1	1	207.011	54.1169	1.80039	1.85938		-1	-1	0	0	-1	-1	-1	-1	-1	-1	-1
256.922	76.0156	13.72	1	-1	1	213.728	54.9506	1.93051	1.85938		-1	-1	0	0	-1	-1	-1	-1	-1	-1	-1
234.109	72.8906	13.72	1	-1	1	191.72	55.89	1.97188	1.85938		-1	-1	0	0	-1	-1	-1	-1	-1	-1	-1
211.922	74.7656	13.72	1	-1	1	170.6	56.125	1.9298	1.85938		-1	-1	0	0	-1	-1	-1	-1	-1	-1	-1
200.984	94.7656	13.72	1	-1	1	160.248	56.2724	1.57049	1.85938		-1	-1	0	0	-1	-1	-1	-1	-1	-1	-1
183.172	96.3281	13.72	1	-1	1	143.18	57.5258	1.54731	1.85938		-1	-1	0	0	-1	-1	-1	-1	-1	-1	-1
183.797	104.766	13.72	1	-1	1	143.71	59.6196	1.40752	1.85938		-1	-1	0	0	-1	-1	-1	-1	-1	-1	-1
179.422	111.641	13.72	1	-1	1	139.44	62.398	1.30488	1.85938		-1	-1	0	0	-1	-1	-1	-1	-1	-1	-1
197.547	111.016	13.72	1	-1	1	156.938	61.1975	1.30549	1.85938		-1	-1	0	0	-1	-1	-1	-1	-1	-1	-1
146.609	92.5781	13.72	1	-1	1	107.954	59.6802	1.62382	1.85938		-1	-1	0	0	-1	-1	-1	-1	-1	-1	-1
154.734	113.203	13.72	1	-1	1	115.657	64.6192	1.29873	1.85938		-1	-1	0	0	-1	-1	-1	-1	-1	-1	-1
192.547	53.2031	17.64	1	-1	1	152.103	61.3767	2.28989	1.85938		-1	-1	1	0	-1	-1	-1	-1	-1	-1	-1
192.859	46.0156	17.64	1	-1	1	152.421	65.452	2.3832	1.85938		-1	-1	0	0	-1	-1	-1	-1	-1	-1	-1
199.422	61.9531	17.64	1	-1	1	158.553	56.8866	2.16279	1.85938		-1	-1	0	0	-1	-1	-1	-1	-1	-1	-1
206.922	58.2031	17.64	1	-1	1	165.61	58.2421	2.22452	1.85938		-1	-1	0	0	-1	-1	-1	-1	-1	-1	-1
215.359	51.0156	17.64	1	-1	1	173.494	61.7045	2.33132	1.85938		-1	-1	0	0	-1	-1	-1	-1	-1	-1	-1
238.797	39.7656	17.64	1	-1	1	195.334	68.4192	2.47961	1.85938		-1	-1	0	0	-1	-1	-1	-1	-1	-1	-1
278.172	38.2031	17.64	1	-1	1	232.597	70.1251	2.51703	1.85938		-1	-1	0	0	-1	-1	-1	-1	-1	-1	-1
299.109	41.0156	17.64	1	-1	1	252.785	68.9326	2.49931	1.85938		-1	-1	0	0	-1	-1	-1	-1	-1	-1	-1
310.047	42.2656	17.64	1	-1	1	263.382	68.5671	2.49222	1.85938		-1	-1	0	0	-1	-1	-1	-1	-1	-1	-1
342.547	42.2656	17.64	1	-1	1	294.999	70.3615	2.51035	1.85938		-1	-1	0	0	-1	-1	-1	-1	-1	-1	-1
329.734	47.2656	17.64	1	-1	1	282.721	66.2479	2.44874	1.85938		-1	-1	0	0	-1	-1	-1	-1	-1	-1	-1
283.797	123.516	17.64	1	-1	1	242.094	61.2577	1.11228	1.85938		-1	-1	0	0	-1	-1	-1	-1	-1	-1	-1
269.734	120.703	17.64	1	-1	1	227.987	60.0534	1.14167	1.85938		-1	-1	0	0	-1	-1	-1	-1	-1	-1	-1
259.109	118.828	17.64	1	-1	1	217.373	59.3293	1.16265	1.85938		-1	-1	0	0	-1	-1	-1	-1	-1	-1	-1
246.609	119.453	17.64	1	-1	1	205.015	60.0449	1.14942	1.85938		-1	-1	0	0	-1	-1	-1	-1	-1	-1	-1
242.234	113.203	17.64	1	-1	1	200.513	56.9774	1.24016	1.85938		-1	-1	0	0	-1	-1	-1	-1	-1	-1	-1
254.734	113.203	17.64	1	-1	1	212.842	56.6141	1.24458	1.85938		-1	-1	0	0	-1	-1	-1	-1	-1	-1	-1
265.672	113.203	17.64	1	-1	1	223.647	56.3251	1.25021	1.85938		-1	-1	0	0	-1	-1	-1	-1	-1	-1	-1
278.172	115.703	17.64	1	-1	1	236.128	57.209	1.21962	1.85938		-1	-1	0	0	-1	-1	-1	-1	-1	-1	-1
298.797	127.578	17.64	1	-1	1	257.247	63.2552	1.07108	1.85938		-1	-1	0	0	-1	-1	-1	-1	-1	-1	-1
320.672	129.453	17.64	1	-1	1	279.165	63.7705	1.06683	1.85938		-1	-1	0	0	-1	-1	-1	-1	-1	-1	-1
193.172	70.3906	17.64	1	-1	1	152.633	54.2376	2.01836	1.85938		-1	-1	0	0	-1	-1	-1	-1	-1	-1	-1
183.172	70.7031	17.64	1	-1	1	143.152	54.7443	2.01043	1.85938		-1	-1	0	0	-1	-1	-1	-1	-1	-1	-1
171.609	70.0781	17.64	1	-1	1	132.152	55.7148	2.01896	1.85938		-1	-1	0	0	-1	-1	-1	-1	-1	-1	-1
165.984	70.3906	17.64	1	-1	1	126.754	56.0514	2.01255	1.85938		-1	-1	0	0	-1	-1	-1	-1	-1	-1	-1
167.234	63.5156	17.64	1	-1	1	128.044	58.2401	2.12627	1.85938		-1	-1	0	0	-1	-1	-1	-1	-1	-1	-1
178.484	63.5156	17.64	1	-1	1	138.771	57.4419	2.12993	1.85938		-1	-1	0	0	-1	-1	-1	-1	-1	-1	-1
191.297	66.0156	17.64	1	-1	1	150.876	55.733	2.09317	1.85938		-1	-1	0	0	-1	-1	-1	-1	-1	-1	-1
189.109	59.1406	17.64	1	-1	1	148.845	58.6351	2.20226	1.85938		-1	-1	0	0	-1	-1	-1	-1	-1	-1	-1
161.297	57.5781	17.64	1	-1	1	122.395	61.2171	2.21392	1.85938		-1	-1	0	0	-1	-1	-1	-1	-1	-1	-1
158.484	63.5156	17.64	1	-1	1	119.585	58.9181	2.12338	1.85938		-1	-1	0	0	-1	-1	-1	-1	-1	-1	-1
249.734	49.1406	17.64	1	-1	1	205.925	62.4564	2.37556	1.85938		-1	-1	0	0	-1	-1	-1	-1	-1	-1	-1
240.984	48.8281	17.64	1	-1	1	197.617	62.6251	2.3744	1.85938		-1	-1	0	0	-1	-1	-1	-1	-1	-1	-1
214.734	62.2656	17.64	1	-1	1	173.011	56.1635	2.16477	1.85938		-1	-1	0	0	-1	-1	-1	-1	-1	-1	-1
226.297	51.3281	17.64	1	-1	1	183.79	61.2995	2.33313	1.85938		-1	-1	0	0	-1	-1	-1	-1	-1	-1	-1
305.672	55.0781	17.64	1	-1	1	259.886	60.3574	2.33379	1.85938		-1	-1	0	0	-1	-1	-1	-1	-1	-1	-1
314.109	53.5156	17.64	1	-1	1	267.968	61.606	2.36105	1.85938		-1	-1	0	0	-1	-1	-1	-1	-1	-1	-1
326.922	55.0781	17.64	1	-1	1	280.496	61.3112	2.34979	1.85938		-1	-1	0	0	-1	-1	-1	-1	-1	-1	-1
334.109	55.3906	17.64	1	-1	1	287.503	61.5026	2.35111	1.85938		-1	-1	0	0	-1	-1	-1	-1	-1	-1	-1
354.734	54.7656	17.64	1	-1	1	308.013	62.9791	2.37451	1.85938		-1	-1	0	0	-1	-1	-1	-1	-1	-1	-1
358.797	46.9531	17.64	1	-1	1	311.529	68.134	2.46984	1.85938		-1	-1	0	0	-1	-1	-1	-1	-1	-1	-1
114.109	101.328	17.64	1	-1	1	75.0616	60.0934	1.47082	1.85938		-1	-1	0	0	-1	-1	-1	-1	-1	-1	-1
117.859	93.2031	17.64	1	-1	1	78.6523	58.2395	1.60665	1.85938		-1	-1	0	0	-1	-1	-1	-1	-1	-1	-1
144.734	100.703	17.64	1	-1	1	105.728	57.4533	1.47602	1.85938		-1	-1	0	0	-1	-1	-1	-1	-1	-1	-1
121.609	68.5156	17.64	1	-1	1	81.9356	60.1073	2.02728	1.85938		-1	-1	0	0	-1	-1	-1	-1	-1	-1	-1
98.7969	66.9531	17.64	1	-1	1	57.166	61.7458	2.02946	1.85938		-1	-1	0	0	-1	-1	-1	-1	-1	-1	-1
142.547	50.3906	17.64	1	-1	1	103.806	66.2758	2.30161	1.85938		-1	-1	0	0	-1	-1	-1	-1	-1	-1	-1
145.047	57.2656	21.0725	1	-1	1	106.02	59.622	2.23728	1.85938		-1	-1	0	0	-1	-1	-1	-1	-1	-1	-1
152.547	56.0156	17.64	1	-1	1	113.842	62.6343	2.23214	1.85938		-1	-1	0	0	-1	-1	-1	-1	-1	-1	-1
164.734	53.5156	17.64	1	-1	1	125.769	62.9516	2.27246	1.85938		-1	-1	0	0	-1	-1	-1	-1	-1	-1	-1
172.234	52.2656	17.64	1	-1	1	132.96	63.0776	2.29293	1.85938		-1	-1	0	0	-1	-1	-1	-1	-1	-1	-1
195.984	76.6406	19.6	1	-1	1	155.185	50.7351	1.91176	1.85938		-1	-1	0	0	-1	-1	-1	-1	-1	-1	-1
183.172	76.0156	19.6	1	-1	1	142.988	51.6059	1.92187	1.85938		-1	-1	0	0	-1	-1	-1	-1	-1	-1	-1
85.7813	70.0781	35.135	1	-1	1	42.5278	44.4429	2.05106	1.85938		-1	-1	0	0	-1	-1	-1	-1	-1	-1	-1
85.7813	62.2656	37.635	1	-1	1	41.7362	45.244	2.23292	1.85938		-1	-1	0	0	-1	-1	-1	-1	-1	-1	-1
85.7813	85.3906	34.8225	1	-1	1	43.8589	42.5497	1.70076	1.85938		-1	-1	0	0	-1	-1	-1	-1	-1	-1	-1
97.5	69.4531	40.135	1	-1	1	54.6307	39.7597	2.13053	1.85938		-1	-1	0	0	-1	-1	-1	-1	-1	-1	-1
97.5	76.0156	32.635	1	-1	1	55.5075	45.0288	1.93108	1.85938		-1	-1	0	0	-1	-1	-1	-1	-1	-1	-1
156.563	65.3906	10.4475	1	-1	1	118.26	65.1328	2.05403	1.85938		-1	-1	0	0	-1	-1	-1	-1	-1	-1	-1
164.109	91.6406	21.56	1	-1	1	124.376	50.4056	1.61911	1.85938		-1	-1	1	0	-1	-1	-1	-1	-1	-1	-1
172.859	76.6406	21.56	1	-1	1	132.997	50.281	1.91612	1.85938		-1	-1	0	0	-1	-1	-1	-1	-1	-1	-1
180.469	87.8906	11.6975	1	-1	1	140.8	58.7777	1.69609	1.85938		-1	-1	0	0	-1	-1	-1	-1	-1	-1	-1
193.594	63.8281	10.76	1	-1	1	153.412	62.8081	2.08782	1.85938		-1	-1	0	0	-1	-1	-1	-1	-1	-1	-1
193.594	57.2656	22.9475	1	-1	1	152.794	54.6825	2.27875	1.85938		-1	-1	0	0	-1	-1	-1	-1	-1	-1	-1
193.594	31.9531	67.9475	1	-1	1	150.447	53.7836	-3.01463	1.85938		-1	-1	0	0	-1	-1	-1	-1	-1	-1	-1
193.594	25.7031	82.635	1	-1	1	149.646	61.3748	-2.76996	1.85938		-1	-1	0	0	-1	-1	-1	-1	-1	-1	-1
226.875	146.641	52.635	1	-1	1	184.963	62.7005	0.412763	1.85938		-1	-1	0	0	-1	-1	-1	-1	-1	-1	-1
226.875	146.641	68.885	1	-1	1	184.454	60.7365	0.151114	1.85938		-1	-1	0	0	-1	-1	-1	-1	-1	-1	-1
107.859	69.4531	39.2	1	-1	1	65.6724	40.2942	2.14106	1.85938		-1	-1	1	0	-1	-1	-1	-1	-1	-1	-1
222.859	41.3281	39.2	1	-1	1	179.727	53.2251	2.72369	1.85938		-1	-1	0	0	-1	-1	-1	-1	-1	-1	-1
220.047	34.4531	39.2	1	-1	1	176.974	59.1106	2.78546	1.85938		-1	-1	0	0	-1	-1	-1	-1	-1	-1	-1
225.984	34.1406	39.2	1	-1	1	182.585	59.3585	2.79204	1.85938		-1	-1	0	0	-1	-1	-1	-1	-1	-1	-1
232.859	30.3906	39.2	1	-1	1	189.023	62.6737	2.82548	1.85938		-1	-1	0	0	-1	-1	-1	-1	-1	-1	-1
240.047	31.9531	39.2	1	-1	1	195.867	61.353	2.81798	1.85938		-1	-1	0	0	-1	-1	-1	-1	-1	-1	-1
254.422	28.8281	39.2	1	-1	1	209.441	64.3904	2.84809	1.85938		-1	-1	0	0	-1	-1	-1	-1	-1	-1	-1
294.109	31.3281	39.2	1	-1	1	247.566	63.6195	2.84738	1.85938		-1	-1	0	0	-1	-1	-1	-1	-1	-1	-1
307.234	31.9531	39.2	1	-1	1	260.265	63.7509	2.84755	1.85938		-1	-1	0	0	-1	-1	-1	-1	-1	-1	-1
325.672	36.6406	39.2	1	-1	1	278.41	60.7027	2.81921	1.85938		-1	-1	0	0	-1	-1	-1	-1	-1	-1	-1
178.125	49.7656	29.51	1	-1	1	137.799	54.6861	2.45074	1.85938		-1	-1	0	0	-1	-1	-1	-1	-1	-1	-1
178.125	56.6406	10.4475	1	-1	1	138.96	66.8387	2.18288	1.85938		-1	-1	0	0	-1	-1	-1	-1	-1	-1	-1
178.125	51.6406	40.135	1	-1	1	137.078	45.8256	2.57271	1.85938		-1	-1	0	0	-1	-1	-1	-1	-1	-1	-1
172.391	42.0313	50.4475	1	-1	1	130.923	48.4818	2.8614	1.85938		-1	-1	0	0	-1	-1	-1	-1	-1	-1	-1
142.031	60.7031	27.3225	1	-1	1	102.389	52.7413	2.23553	1.85938		-1	-1	0	0	-1	-1	-1	-1	-1	-1	-1
142.031	59.7656	39.8225	1	-1	1	101.301	42.8431	2.39589	1.85938		-1	-1	0	0	-1	-1	-1	-1	-1	-1	-1
142.391	68.2813	30.4475	1	-1	1	102.458	46.607	2.12565	1.85938		-1	-1	1	0	-1	-1	-1	-1	-1	-1	-1
143.438	101.016	30.4475	1	-1	1	103.379	45.4229	1.39917	1.85938		-1	-1	0	0	-1	-1	-1	-1	-1	-1	-1
143.438	94.1406	27.9475	1	-1	1	103.618	46.1177	1.55828	1.85938		-1	-1	0	0	-1	-1	-1	-1	-1	-1	-1
143.438	79.1406	26.0725	1	-1	1	103.845	47.8187	1.87925	1.85938		-1	-1	0	0	-1	-1	-1	-1	-1	-1	-1
241.609	55.3906	39.2	2	-1	1	197.939	42.1037	2.5563	1.85938		-1	-1	1	0	-1	-1	-1	-1	-1	-1	-1
272.547	55.0781	39.2	2	-1	1	227.836	42.8826	2.58669	1.85938		-1	-1	1	0	-1	-1	-1	-1	-1	-1	-1
288.797	56.0938	39.2	2	-1	1	243.673	42.6866	2.58391	1.85938		-1	-1	0	0	2	-1	-1	-1	-1	-1	-1
322.859	58.2031	39.2	2	-1	1	277.037	42.7829	2.57816	1.85938		-1	-1	0	0	3	-1	-1	-1	-1	-1	-1
328.797	58.2031	39.2	2	-1	1	282.847	43.132	2.58288	1.85938		-1	-1	0	0	3	-1	-1	-1	-1	-1	-1
333.797	59.4531	39.2	2	-1	1	287.825	42.5121	2.56731	1.85938		-1	-1	0	0	3	-1	-1	-1	-1	-1	-1
341.609	49.4531	39.2	2	-1	1	294.924	50.8291	2.70609	1.85938		-1	-1	0	0	3	-1	-1	-1	-1	-1	-1
253.172	45.3906	47.04	2	-1	1	208.661	46.0453	2.84115	1.85938		-1	-1	0	0	-1	-1	-1	-1	-1	-1	-1
246.922	43.8281	47.04	2	-1	1	202.593	47.3167	2.85177	1.85938		-1	-1	0	0	-1	-1	-1	-1	-1	-1	-1
238.172	44.1406	47.04	2	-1	1	194.19	46.9081	2.84269	1.85938		-1	-1	0	0	-1	-1	-1	-1	-1	-1	-1
231.922	46.6406	47.04	2	-1	1	188.241	44.6379	2.81284	1.85938		-1	-1	0	0	-1	-1	-1	-1	-1	-1	-1
228.172	48.2031	47.04	2	-1	1	184.668	43.2577	2.79264	1.85938		-1	-1	0	0	-1	-1	-1	-1	-1	-1	-1
220.984	48.2031	47.04	2	-1	1	177.769	43.2768	2.78624	1.85938		-1	-1	0	0	-1	-1	-1	-1	-1	-1	-1
197.547	50.7031	47.04	2	-1	1	155.316	41.5634	2.73204	1.85938		-1	-1	0	0	-1	-1	-1	-1	-1	-1	-1
188.172	51.0156	47.04	2	-1	1	146.312	41.6317	2.71722	1.85938		-1	-1	0	0	-1	-1	-1	-1	-1	-1	-1
239.109	138.516	47.04	1	-1	1	197.462	56.3449	0.541098	1.85938		-1	-1	0	0	-1	-1	-1	-1	-1	-1	-1
255.359	138.203	47.04	1	-1	1	214.006	55.4842	0.542449	1.85938		-1	-1	0	0	-1	-1	-1	-1	-1	-1	-1
270.984	138.203	47.04	1	-1	1	229.891	54.8531	0.545068	1.85938		-1	-1	0	0	-1	-1	-1	-1	-1	-1	-1
290.047	141.328	47.04	1	-1	1	249.394	56.8857	0.531458	1.85938		-1	-1	0	0	-1	-1	-1	-1	-1	-1	-1
320.047	144.453	47.04	1	-1	1	279.958	58.2231	0.528824	1.85938		-1	-1	0	0	-1	-1	-1	-1	-1	-1	-1
298.797	30.0781	47.04	1	-1	1	252.06	61.9633	2.97146	1.85938		-1	-1	0	0	-1	-1	-1	-1	-1	-1	-1
283.484	26.0156	47.04	1	-1	1	237.09	65.0438	2.98786	1.85938		-1	-1	0	0	-1	-1	-1	-1	-1	-1	-1
275.047	22.5781	47.04	1	-1	1	228.838	67.9474	3.00119	1.85938		-1	-1	0	0	-1	-1	-1	-1	-1	-1	-1
264.734	22.5781	47.04	1	-1	1	218.971	67.5606	2.99779	1.85938		-1	-1	0	0	-1	-1	-1	-1	-1	-1	-1
255.672	24.7656	47.04	1	-1	1	210.396	65.2002	2.98413	1.85938		-1	-1	0	0	-1	-1	-1	-1	-1	-1	-1
244.109	25.0781	47.04	1	-1	1	199.394	64.6304	2.97738	1.85938		-1	-1	0	0	-1	-1	-1	-1	-1	-1	-1
236.922	29.4531	47.04	1	-1	1	192.664	60.3909	2.95028	1.85938		-1	-1	0	0	-1	-1	-1	-1	-1	-1	-1
228.172	34.4531	47.04	1	-1	1	184.435	55.6548	2.91357	1.85938		-1	-1	0	0	-1	-1	-1	-1	-1	-1	-1
214.734	39.4531	47.04	1	-1	1	171.703	51.1017	2.86583	1.85938		-1	-1	0	0	-1	-1	-1	-1	-1	-1	-1
190.359	45.3906	47.04	1	-1	1	148.447	46.3485	2.78649	1.85938		-1	-1	0	0	-1	-1	-1	-1	-1	-1	-1
325.047	34.7656	47.04	1	-1	1	277.791	59.1365	2.9511	1.85938		-1	-1	0	0	-1	-1	-1	-1	-1	-1	-1
347.234	35.3906	47.04	1	-1	1	299.704	60.0868	2.95099	1.85938		-1	-1	0	0	-1	-1	-1	-1	-1	-1	-1
343.172	32.2656	47.04	1	-1	1	295.437	62.7287	2.96793	1.85938		-1	-1	0	0	-1	-1	-1	-1	-1	-1	-1
318.172	30.7031	47.04	1	-1	1	270.861	62.5054	2.97244	1.85938		-1	-1	0	0	-1	-1	-1	-1	-1	-1	-1
325.672	146.953	50.96	1	-1	1	285.879	58.9963	0.455925	1.85938		-1	-1	0	0	-1	-1	-1	-1	-1	-1	-1
290.984	149.766	50.96	1	-1	1	250.83	63.6418	0.427102	1.85938		-1	-1	0	0	-1	-1	-1	-1	-1	-1	-1
276.922	142.891	53.9	1	-1	1	236.138	56.9481	0.404445	1.85938		-1	-1	0	0	-1	-1	-1	-1	-1	-1	-1
259.734	143.203	53.9	1	-1	1	218.588	57.9945	0.400987	1.85938		-1	-1	0	0	-1	-1	-1	-1	-1	-1	-1
244.109	143.828	53.9	1	-1	1	202.589	59.1695	0.399376	1.85938		-1	-1	0	0	-1	-1	-1	-1	-1	-1	-1
187.547	136.016	52.92	1	-1	1	144.708	53.1179	0.489037	1.85938		-1	-1	0	0	-1	-1	-1	-1	-1	-1	-1
181.297	135.703	52.92	1	-1	1	138.426	52.9014	0.498612	1.85938		-1	-1	0	0	-1	-1	-1	-1	-1	-1	-1
172.547	132.266	52.92	1	-1	1	129.745	49.7984	0.534094	1.85938		-1	-1	0	0	-1	-1	-1	-1	-1	-1	-1
166.609	131.953	52.92	1	-1	1	123.884	49.6033	0.545518	1.85938		-1	-1	0	0	-1	-1	-1	-1	-1	-1	-1
83.4844	58.2031	52.92	1	-1	1	38.4874	35.3691	2.53828	1.85938		-1	-1	0	0	2	-1	-1	-1	-1	-1	-1
85.6719	52.8906	57.82	1	-1	1	40.0218	36.5934	2.74179	1.85938		-1	-1	0	0	2	-1	-1	-1	-1	-1	-1
78.2813	58.8281	59.8225	1	-1	1	33.0781	30.2271	2.67345	1.85938		-1	-1	0	0	2	-1	-1	-1	-1	-1	-1
78.4844	62.2656	47.04	1	-1	1	34.0881	37.143	2.33548	1.85938		-1	-1	1	0	-1	-1	-1	-1	-1	-1	-1
98.1719	50.0781	48.02	1	-1	1	53.524	45.0985	2.61307	1.85938		-1	-1	0	0	-1	-1	-1	-1	-1	-1	-1
61.4063	93.0469	37.2444	1	-1	1	20.0563	42.5627	1.47059	1.85938		-1	-1	0	0	-1	-1	-1	-1	-1	-1	-1
61.4063	85.0781	36.5412	1	-1	1	19.4187	41.9225	1.65891	1.85938		-1	-1	0	0	-1	-1	-1	-1	-1	-1	-1
61.4063	77.5781	36.0725	1	-1	1	18.8107	42.502	1.83609	1.85938		-1	-1	0	0	-1	-1	-1	-1	-1	-1	-1
61.4063	79.9219	45.2131	1	-1	1	18.6346	33.204	1.79347	1.85938		-1	-1	0	0	-1	-1	-1	-1	-1	-1	-1
61.4063	69.6094	51.7756	1	-1	1	17.5052	29.2781	2.16559	1.85938		-1	-1	0	0	-1	-1	-1	-1	-1	-1	-1
115.438	116.719	52.92	1	-1	1	74.379	38.4076	0.795652	1.85938		-1	-1	0	0	-1	-1	-1	-1	-1	-1	-1
143.094	123.984	52.92	1	-1	1	101.107	43.0218	0.659261	1.85938		-1	-1	0	0	-1	-1	-1	-1	-1	-1	-1
152.469	126.328	52.92	1	-1	1	110.148	44.7867	0.618093	1.85938		-1	-1	0	0	-1	-1	-1	-1	-1	-1	-1
61.4063	109.219	52.7131	1	-1	1	20.7787	37.3941	0.919242	1.85938		-1	-1	0	0	-1	-1	-1	-1	-1	-1	-1
68.5625	109.922	52.92	1	-1	1	27.9543	37.1297	0.907579	1.85938		-1	-1	0	0	-1	-1	-1	-1	-1	-1	-1
85.9063	110.859	52.92	1	-1	1	45.2566	36.2736	0.902495	1.85938		-1	-1	0	0	-1	-1	-1	-1	-1	-1	-1
83.5625	113.906	55.86	1	-1	1	43.0791	37.0013	0.786998	1.85938		-1	-1	0	0	-1	-1	-1	-1	-1	-1	-1
77.4688	113.672	55.86	1	-1	1	37.0158	37.3699	0.788175	1.85938		-1	-1	0	0	-1	-1	-1	-1	-1	-1	-1
62.4688	112.734	55.86	1	-1	1	22.0024	37.9881	0.796333	1.85938		-1	-1	0	0	-1	-1	-1	-1	-1	-1	-1
68.7969	104.766	55.86	1	-1	1	27.6369	31.3742	0.949521	1.85938		-1	-1	0	0	-1	-1	-1	-1	-1	-1	-1
75.3594	107.109	55.86	1	-1	1	34.3669	32.4798	0.904845	1.85938		-1	-1	0	0	-1	-1	-1	-1	-1	-1	-1
80.75	107.109	55.86	1	-1	1	39.7342	31.9993	0.909262	1.85938		-1	-1	0	0	-1	-1	-1	-1	-1	-1	-1
54.5	109.219	55.86	1	-1	1	13.7743	35.9446	0.850206	1.85938		-1	-1	0	0	-1	-1	-1	-1	-1	-1	-1
50.625	93.9844	55.9944	1	-1	1	8.63689	26.2267	1.2174	1.85938		-1	-1	1	0	-1	-1	-1	-1	-1	-1	-1
49.2188	76.875	49.4319	1	-1	1	6.07339	29.6982	1.86851	1.85938		-1	-1	0	0	-1	-1	-1	-1	-1	-1	-1
49.8906	77.9688	59.2756	1	-1	1	6.43308	19.7833	1.88243	1.85938		-1	-1	0	0	-1	-1	-1	-1	-1	-1	-1
51.0938	72.4219	59.51	1	-1	1	7.15769	21.0995	2.15178	1.85938		-1	-1	0	0	-1	-1	-1	-1	-1	-1	-1
51.0938	67.7344	61.1506	1	-1	1	6.69899	22.0551	2.37769	1.85938		-1	-1	0	0	-1	-1	-1	-1	-1	-1	-1
51.0938	62.5781	55.5256	1	-1	1	6.49686	29.6555	2.4031	1.85938		-1	-1	0	0	-1	-1	-1	-1	-1	-1	-1
51.0938	58.8281	62.7912	1	-1	1	5.88756	27.2906	2.67894	1.85938		-1	-1	0	0	-1	-1	-1	-1	-1	-1	-1
58.25	97.2656	62.72	1	-1	1	16.2294	22.1874	0.954498	1.85938		-1	-1	0	0	-1	-1	-1	-1	-1	-1	-1
52.625	96.0938	62.72	1	-1	1	10.5308	21.8701	0.984507	1.85938		-1	-1	0	0	-1	-1	-1	-1	-1	-1	-1
60.125	81.4063	64.645	2	-1	1	16.6919	13.7845	1.75878	1.85938		-1	-1	0	0	-1	-1	-1	-1	-1	-1	-1
59.1094	87.6563	62.72	2	-1	1	16.2816	16.8314	1.37187	1.85938		-1	-1	0	0	-1	-1	-1	-1	-1	-1	-1
64.1094	75.7813	62.72	3	-1	1	20.2671	16.7694	2.11854	1.85938		-1	-1	0	0	-1	-1	-1	-1	-1	-1	-1
66.6094	72.6563	62.72	3	-1	1	22.495	18.1926	2.29114	1.85938		-1	-1	0	0	-1	-1	-1	-1	-1	-1	-1
71.1406	63.2813	67.62	2	-1	1	26.0233	21.9284	2.81382	1.85938		-1	-1	0	0	-1	-1	-1	-1	-1	-1	-1
77.4688	59.5313	67.62	2	-1	1	32.0105	25.6642	2.90148	1.85938		-1	-1	0	0	-1	-1	-1	-1	-1	-1	-1
84.5	56.25	67.62	2	-1	1	38.7369	29.1516	2.96274	1.85938		-1	-1	0	0	-1	-1	-1	-1	-1	-1	-1
91.0625	56.0156	67.62	2	-1	1	45.4179	29.7927	2.97997	1.85938		-1	-1	0	0	-1	-1	-1	-1	-1	-1	-1
96.6875	55.5469	67.62	2	-1	1	51.2785	30.5536	2.99716	1.85938		-1	-1	0	0	-1	-1	-1	-1	-1	-1	-1
102.547	54.6094	67.62	2	-1	1	57.3828	31.7271	3.01876	1.85938		-1	-1	0	0	-1	-1	-1	-1	-1	-1	-1
65.5156	66.3281	67.62	2	-1	1	20.6774	19.0375	2.71583	1.85938		-1	-1	1	0	-1	-1	-1	-1	-1	-1	-1
97.3906	49.4531	68.6	1	-1	1	51.5147	36.1936	3.07522	1.85938		-1	-1	0	0	-1	-1	-1	-1	-1	-1	-1
108.875	47.5781	68.6	1	-1	1	63.6191	38.5705	3.10596	1.85938		-1	-1	0	0	-1	-1	-1	-1	-1	-1	-1
90.9375	48.9844	66.7756	1	-1	1	44.7364	36.7266	3.01915	1.85938		-1	-1	0	0	-1	-1	-1	-1	-1	-1	-1
99.7344	42.4219	64.68	1	-1	1	53.7165	44.1057	3.02837	1.85938		-1	-1	0	0	-1	-1	-1	-1	-1	-1	-1
95.9844	30.7031	64.68	1	-1	1	48.7445	55.2265	3.0819	1.85938		-1	-1	0	0	-1	-1	-1	-1	-1	-1	-1
125.047	27.6563	64.68	1	-1	1	80.6969	59.2641	3.12702	1.85938		-1	-1	0	0	-1	-1	-1	-1	-1	-1	-1
67.8594	32.5781	64.68	1	-1	1	20.3089	51.4435	3.04201	1.85938		-1	-1	0	0	-1	-1	-1	-1	-1	-1	-1
110.156	41.0156	62.7912	1	-1	1	65.0343	46.4005	3.01302	1.85938		-1	-1	0	0	-1	-1	-1	-1	-1	-1	-1
122.344	40.5469	64.1975	1	-1	1	78.1525	46.7182	3.06426	1.85938		-1	-1	0	0	-1	-1	-1	-1	-1	-1	-1
136.406	37.2656	63.7287	1	-1	1	93.2662	50.0072	3.09306	1.85938		-1	-1	0	0	-1	-1	-1	-1	-1	-1	-1
145.313	37.0313	66.0725	1	-1	1	102.449	49.7029	-3.12845	1.85938		-1	-1	0	0	-1	-1	-1	-1	-1	-1	-1
150.469	38.9063	62.7912	1	-1	1	108.067	48.3306	3.09085	1.85938		-1	-1	0	0	-1	-1	-1	-1	-1	-1	-1
163.953	37.7344	64.68	1	-1	1	121.575	48.8059	-3.12789	1.85938		-1	-1	0	0	-1	-1	-1	-1	-1	-1	-1
164.063	38.2031	71.9319	1	-1	1	121.096	47.8223	-2.97889	1.85938		-1	-1	0	0	-1	-1	-1	-1	-1	-1	-1
164.063	38.4375	78.26	1	-1	1	120.582	48.027	-2.847	1.85938		-1	-1	0	0	-1	-1	-1	-1	-1	-1	-1
173.906	36.7969	60.4475	1	-1	1	131.75	50.212	3.08945	1.85938		-1	-1	0	0	-1	-1	-1	-1	-1	-1	-1
173.906	34.6875	67.2444	1	-1	1	131.285	51.3429	-3.05547	1.85938		-1	-1	0	0	-1	-1	-1	-1	-1	-1	-1
183.875	36.0938	64.68	1	-1	1	141.193	50.0024	-3.09481	1.85938		-1	-1	0	0	-1	-1	-1	-1	-1	-1	-1
206.25	31.6406	68.1819	1	-1	1	162.647	54.0602	-2.99749	1.85938		-1	-1	0	0	-1	-1	-1	-1	-1	-1	-1
208.328	35.1563	83.885	1	-1	1	163.96	52.6925	-2.69448	1.85938		-1	-1	0	0	-1	-1	-1	-1	-1	-1	-1
215.156	34.4531	63.4944	1	-1	1	171.431	51.5539	-3.08132	1.85938		-1	-1	0	0	-1	-1	-1	-1	-1	-1	-1
215.156	35.625	91.385	1	-1	1	170.337	55.0095	-2.55584	1.85938		-1	-1	0	0	-1	-1	-1	-1	-1	-1	-1
215.156	23.9063	85.76	1	-1	1	170.47	64.1451	-2.71167	1.85938		-1	-1	0	0	-1	-1	-1	-1	-1	-1	-1
218.438	26.9531	70.9944	1	-1	1	174.235	58.8727	-2.93924	1.85938		-1	-1	0	0	-1	-1	-1	-1	-1	-1	-1
221.719	30.2344	61.8537	1	-1	1	177.745	55.9711	-3.09805	1.85938		-1	-1	0	0	-1	-1	-1	-1	-1	-1	-1
221.719	24.8438	94.9006	1	-1	1	176.533	66.4517	-2.57145	1.85938		-1	-1	0	0	-1	-1	-1	-1	-1	-1	-1
229.219	22.2656	67.01	1	-1	1	184.649	63.6756	-2.99865	1.85938		-1	-1	0	0	-1	-1	-1	-1	-1	-1	-1
234.375	20.8594	61.1506	1	-1	1	189.711	65.5374	-3.08503	1.85938		-1	-1	0	0	-1	-1	-1	-1	-1	-1	-1
234.375	19.2188	70.2912	1	-1	1	189.444	66.8468	-2.94639	1.85938		-1	-1	0	0	-1	-1	-1	-1	-1	-1	-1
243.281	23.2031	56.2287	1	-1	1	198.376	64.1057	3.12218	1.85938		-1	-1	0	0	-1	-1	-1	-1	-1	-1	-1
243.281	26.9531	82.4787	1	-1	1	197.937	61.062	-2.73793	1.85938		-1	-1	0	0	-1	-1	-1	-1	-1	-1	-1
254.063	29.2969	92.3225	1	-1	1	208.356	62.3427	-2.57313	1.85938		-1	-1	0	0	-1	-1	-1	-1	-1	-1	-1
254.063	23.6719	59.0412	1	-1	1	208.657	63.4833	-3.11446	1.85938		-1	-1	0	0	-1	-1	-1	-1	-1	-1	-1
258.281	28.5938	79.4319	1	-1	1	212.626	59.3024	-2.77834	1.85938		-1	-1	0	0	-1	-1	-1	-1	-1	-1	-1
260.156	146.719	58.8069	1	-1	1	219.114	60.4945	0.308654	1.85938		-1	-1	0	0	-1	-1	-1	-1	-1	-1	-1
260.156	145.781	65.6037	1	-1	1	219.013	58.9532	0.197039	1.85938		-1	-1	0	0	-1	-1	-1	-1	-1	-1	-1
234.844	146.016	71.4631	1	-1	1	192.674	60.0453	0.104861	1.85938		-1	-1	0	0	-1	-1	-1	-1	-1	-1	-1
216.563	145.547	68.6506	1	-1	1	173.698	59.784	0.160352	1.85938		-1	-1	0	0	-1	-1	-1	-1	-1	-1	-1
172.5	137.578	69.1194	1	-1	1	128.413	51.6986	0.199258	1.85938		-1	-1	0	0	-1	-1	-1	-1	-1	-1	-1
223.953	60	73.5	4	-1	1	179.927	26.3533	-2.78425	1.85938		-1	-1	0	0	-1	-1	-1	-1	-1	-1	-1
216.453	60.9375	73.5	4	-1	1	172.543	25.2918	-2.78713	1.85938		-1	-1	0	0	-1	-1	-1	-1	-1	-1	-1
177.781	63.2813	73.5	4	-1	1	134.315	22.7338	-2.86098	1.85938		-1	-1	0	0	-1	-1	-1	-1	-1	-1	-1
182.703	62.8125	73.5	4	-1	1	139.203	23.1871	-2.84849	1.85938		-1	-1	0	0	-1	-1	-1	-1	-1	-1	-1
168.406	63.5156	73.5	4	-1	1	124.979	22.5475	-2.89123	1.85938		-1	-1	0	0	-1	-1	-1	-1	-1	-1	-1
163.719	62.8125	73.5	4	-1	1	120.302	23.2802	-2.91007	1.85938		-1	-1	0	0	-1	-1	-1	-1	-1	-1	-1
159.734	63.0469	73.5	4	-1	1	116.302	23.0751	-2.92353	1.85938		-1	-1	0	0	-1	-1	-1	-1	-1	-1	-1
136.766	64.9219	73.5	4	-1	1	92.9869	21.2705	-3.00946	1.85938		-1	-1	0	0	-1	-1	-1	-1	-1	-1	-1
131.609	65.3906	73.5	4	-1	1	87.7032	20.7651	-3.03042	1.85938		-1	-1	0	0	-1	-1	-1	-1	-1	-1	-1
104.891	68.2031	73.5	4	-1	1	60.3109	17.2427	3.13344	1.85938		-1	-1	0	0	-1	-1	-1	-1	-1	-1	-1
99.2656	68.4375	73.5	4	-1	1	54.5541	16.7314	3.10939	1.85938		-1	-1	0	0	-1	-1	-1	-1	-1	-1	-1
94.3438	68.6719	73.5	4	-1	1	49.5306	16.2197	3.08774	1.85938		-1	-1	0	0	-1	-1	-1	-1	-1	-1	-1
209.422	62.5781	73.5	4	-1	1	165.616	23.5753	-2.78581	1.85938		-1	-1	0	0	2	-1	-1	-1	-1	-1	-1
217.859	63.9844	73.5	4	-1	1	173.961	22.3356	-2.75856	1.85938		-1	-1	0	0	2	-1	-1	-1	-1	-1	-1
223.953	63.9844	73.5	4	-1	1	179.984	22.4595	-2.74965	1.85938		-1	-1	0	0	2	-1	-1	-1	-1	-1	-1
230.281	62.3438	73.5	4	-1	1	186.209	24.2057	-2.75801	1.85938		-1	-1	0	0	2	-1	-1	-1	-1	-1	-1
235.672	61.6406	73.5	4	-1	1	191.518	25.032	-2.75929	1.85938		-1	-1	0	0	2	-1	-1	-1	-1	-1	-1
241.297	61.4063	73.5	4	-1	1	197.067	25.4221	-2.7572	1.85938		-1	-1	0	0	2	-1	-1	-1	-1	-1	-1
246.453	61.4063	73.5	4	-1	1	202.159	25.5834	-2.75429	1.85938		-1	-1	0	0	2	-1	-1	-1	-1	-1	-1
204.734	61.875	73.5	4	-1	1	160.987	24.2099	-2.80032	1.85938		-1	-1	0	0	2	-1	-1	-1	-1	-1	-1
200.75	63.0469	73.5	4	-1	1	157.053	23.0191	-2.79981	1.85938		-1	-1	0	0	2	-1	-1	-1	-1	-1	-1
195.594	62.5781	73.5	4	-1	1	151.96	23.4444	-2.81535	1.85938		-1	-1	0	0	2	-1	-1	-1	-1	-1	-1
152	62.5781	73.5	4	-1	1	108.507	23.5946	-2.95222	1.85938		-1	-1	0	0	2	-1	-1	-1	-1	-1	-1
144.969	63.5156	73.5	4	-1	1	101.363	22.6854	-2.97734	1.85938		-1	-1	0	0	2	-1	-1	-1	-1	-1	-1
87.7813	69.6094	73.5	4	-1	1	42.9046	14.8854	3.04778	1.85938		-1	-1	0	0	2	-1	-1	-1	-1	-1	-1
78.4063	71.9531	73.5	4	-1	1	33.7431	12.0255	2.9505	1.85938		-1	-1	0	0	2	-1	-1	-1	-1	-1	-1
174.266	67.2656	71.54	5	-1	1	130.913	18.6343	-2.95353	1.85938		-1	-1	0	0	2	-1	-1	-1	-1	-1	-1
166.766	67.9688	71.54	5	-1	1	123.435	18.0231	-2.98438	1.85938		-1	-1	0	0	2	-1	-1	-1	-1	-1	-1
158.563	68.2031	71.54	5	-1	1	115.227	17.9069	-3.02147	1.85938		-1	-1	0	0	2	-1	-1	-1	-1	-1	-1
148.016	68.9063	71.54	5	-1	1	104.602	17.3566	-3.07395	1.85938		-1	-1	0	0	2	-1	-1	-1	-1	-1	-1
137	68.9063	72.4006	5	-1	1	93.3473	17.3611	-3.07797	1.85938		-1	-1	0	0	2	-1	-1	-1	-1	-1	-1
127.156	69.8438	71.54	5	-1	1	83.3749	16.5528	3.09956	1.85938		-1	-1	0	0	2	-1	-1	-1	-1	-1	-1
104.422	70.7813	71.54	5	-1	1	60.099	15.2126	2.97533	1.85938		-1	-1	0	0	2	-1	-1	-1	-1	-1	-1
158.094	104.297	66.7756	5	-1	1	114.739	19.0118	0.454153	1.85938		-1	-1	0	0	2	-1	-1	-1	-1	-1	-1
149.891	103.828	69.58	5	-1	1	106.428	17.9751	0.350565	1.85938		-1	-1	0	0	2	-1	-1	-1	-1	-1	-1
140.75	102.656	69.58	5	-1	1	97.4629	16.9747	0.408808	1.85938		-1	-1	0	0	2	-1	-1	-1	-1	-1	-1
112.156	100.547	69.58	5	-1	1	69.4556	16.2432	0.564763	1.85938		-1	-1	0	0	2	-1	-1	-1	-1	-1	-1
100.906	98.2031	69.58	5	-1	1	58.3007	14.9515	0.654488	1.85938		-1	-1	0	0	2	-1	-1	-1	-1	-1	-1
80.2813	94.4531	69.58	5	-1	1	37.6508	13.5985	0.794972	1.85938		-1	-1	0	0	2	-1	-1	-1	-1	-1	-1
212.469	104.766	69.58	5	-1	1	169.087	19.0569	0.119101	1.85938		-1	-1	0	0	-1	-1	-1	-1	-1	-1	-1
197.938	105.703	69.58	5	-1	1	154.381	20.0112	0.155647	1.85938		-1	-1	0	0	-1	-1	-1	-1	-1	-1	-1
188.563	104.766	69.58	5	-1	1	144.925	19.0302	0.184072	1.85938		-1	-1	0	0	-1	-1	-1	-1	-1	-1	-1
219.969	105.469	69.58	5	-1	1	176.694	19.7001	0.105873	1.85938		-1	-1	1	0	-1	-1	-1	-1	-1	-1	-1
244.578	105.469	69.58	5	-1	1	201.632	19.2411	0.0708652	1.85938		-1	-1	1	0	-1	-1	-1	-1	-1	-1	-1
269.891	106.641	69.58	5	-1	1	227.276	19.5236	0.0582256	1.85938		-1	-1	1	0	-1	-1	-1	-1	-1	-1	-1
280.438	105.938	69.58	5	-1	1	237.888	18.3471	0.050385	1.85938		-1	-1	1	0	-1	-1	-1	-1	-1	-1	-1
292.859	108.281	69.58	5	-1	1	250.535	20.0354	0.0620984	1.85938		-1	-1	0	0	-1	-1	-1	-1	-1	-1	-1
303.641	107.813	69.58	5	-1	1	261.368	18.9558	0.0605418	1.85938		-1	-1	0	0	-1	-1	-1	-1	-1	-1	-1
291.922	68.2031	69.58	5	-1	1	247.448	20.1508	-2.87313	1.85938		-1	-1	1	0	-1	-1	-1	-1	-1	-1	-1
283.25	66.3281	69.58	5	-1	1	238.767	21.5759	-2.87955	1.85938		-1	-1	0	0	-1	-1	-1	-1	-1	-1	-1
275.281	66.3281	69.58	5	-1	1	230.882	21.2016	-2.87876	1.85938		-1	-1	0	0	-1	-1	-1	-1	-1	-1	-1
265.672	65.625	69.58	5	-1	1	221.347	21.4877	-2.88301	1.85938		-1	-1	0	0	-1	-1	-1	-1	-1	-1	-1
256.063	65.8594	69.58	5	-1	1	211.856	20.8861	-2.88548	1.85938		-1	-1	0	0	-1	-1	-1	-1	-1	-1	-1
246.922	65.8594	69.58	5	-1	1	202.822	20.5803	-2.8914	1.85938		-1	-1	0	0	-1	-1	-1	-1	-1	-1	-1
235.203	66.0938	69.58	5	-1	1	191.252	20.0238	-2.90224	1.85938		-1	-1	0	0	-1	-1	-1	-1	-1	-1	-1
225.594	66.7969	69.58	5	-1	1	181.775	19.1203	-2.91349	1.85938		-1	-1	0	0	-1	-1	-1	-1	-1	-1	-1
215.75	67.2656	69.58	5	-1	1	172.061	18.5085	-2.93077	1.85938		-1	-1	0	0	-1	-1	-1	-1	-1	-1	-1
204.266	67.5	69.58	5	-1	1	160.723	18.194	-2.95825	1.85938		-1	-1	0	0	-1	-1	-1	-1	-1	-1	-1
194.891	67.7344	69.58	5	-1	1	151.464	17.9679	-2.98583	1.85938		-1	-1	0	0	-1	-1	-1	-1	-1	-1	-1
184.813	67.7344	69.58	5	-1	1	141.502	18.0509	-3.0202	1.85938		-1	-1	0	0	-1	-1	-1	-1	-1	-1	-1
300.828	69.1406	69.58	5	-1	1	256.323	19.7007	-2.87283	1.85938		-1	-1	0	0	-1	-1	-1	-1	-1	-1	-1
308.328	70.0781	69.58	5	-1	1	263.812	19.198	-2.8731	1.85938		-1	-1	0	0	-1	-1	-1	-1	-1	-1	-1
348.875	72.4219	69.58	5	-1	1	304.264	19.4814	-2.90463	1.85938		-1	-1	0	0	-1	-1	-1	-1	-1	-1	-1
355.438	71.7188	69.58	5	-1	1	310.762	20.6232	-2.91388	1.85938		-1	-1	0	0	-1	-1	-1	-1	-1	-1	-1
304.813	65.1563	72.52	4	-1	1	260.066	24.3112	-2.77187	1.85938		-1	-1	0	0	-1	-1	-1	-1	-1	-1	-1
311.141	65.625	72.52	4	-1	1	266.362	24.2098	-2.77329	1.85938		-1	-1	0	0	-1	-1	-1	-1	-1	-1	-1
317.703	66.3281	72.52	4	-1	1	272.907	23.9056	-2.77368	1.85938		-1	-1	0	0	-1	-1	-1	-1	-1	-1	-1
323.563	66.7969	72.52	4	-1	1	278.743	23.8005	-2.77596	1.85938		-1	-1	0	0	-1	-1	-1	-1	-1	-1	-1
330.359	67.5	72.52	4	-1	1	285.525	23.5353	-2.77797	1.85938		-1	-1	0	0	-1	-1	-1	-1	-1	-1	-1
357.078	65.625	72.52	4	-1	1	312.031	27.1012	-2.82084	1.85938		-1	-1	0	0	-1	-1	-1	-1	-1	-1	-1
225.359	105.703	82.32	4	-1	1	181.745	24.2804	-0.4524	1.85938		-1	-1	0	0	-1	-1	-1	-1	-1	-1	-1
218.563	106.641	82.32	4	-1	1	174.796	24.9963	-0.421354	1.85938		-1	-1	0	0	-1	-1	-1	-1	-1	-1	-1
213.172	107.109	82.32	4	-1	1	169.275	25.3151	-0.403363	1.85938		-1	-1	0	0	-1	-1	-1	-1	-1	-1	-1
202.625	106.875	82.32	4	-1	1	158.465	24.8896	-0.391578	1.85938		-1	-1	0	0	-1	-1	-1	-1	-1	-1	-1
183.875	105.703	82.32	4	-1	1	139.336	23.224	-0.380604	1.85938		-1	-1	0	0	-1	-1	-1	-1	-1	-1	-1
180.594	105.703	82.32	4	-1	1	136.007	23.0781	-0.373153	1.85938		-1	-1	0	0	-1	-1	-1	-1	-1	-1	-1
174.969	106.406	82.32	4	-1	1	130.31	23.4277	-0.344639	1.85938		-1	-1	0	0	-1	-1	-1	-1	-1	-1	-1
259.813	106.641	82.32	4	-1	1	216.956	24.7	-0.473958	1.85938		-1	-1	0	0	-1	-1	-1	-1	-1	-1	-1
263.797	107.109	82.32	4	-1	1	221.031	24.9741	-0.467454	1.85938		-1	-1	0	0	-1	-1	-1	-1	-1	-1	-1
230.047	106.875	82.32	4	-1	1	186.565	25.2587	-0.431898	1.85938		-1	-1	0	0	2	-1	-1	-1	-1	-1	-1
234.734	106.875	82.32	4	-1	1	191.363	25.2505	-0.43794	1.85938		-1	-1	0	0	2	-1	-1	-1	-1	-1	-1
239.656	106.875	82.32	4	-1	1	196.397	25.2208	-0.444122	1.85938		-1	-1	0	0	2	-1	-1	-1	-1	-1	-1
245.75	106.406	82.32	4	-1	1	202.609	24.7739	-0.462499	1.85938		-1	-1	0	0	2	-1	-1	-1	-1	-1	-1
248.563	106.641	82.32	4	-1	1	205.487	24.9237	-0.460435	1.85938		-1	-1	0	0	2	-1	-1	-1	-1	-1	-1
253.016	106.641	82.32	4	-1	1	210.03	24.8469	-0.465819	1.85938		-1	-1	0	0	2	-1	-1	-1	-1	-1	-1
275.047	107.813	82.32	4	-1	1	232.503	25.1864	-0.463712	1.85938		-1	-1	0	0	2	-1	-1	-1	-1	-1	-1
270.594	107.109	82.32	4	-1	1	227.945	24.7717	-0.475334	1.85938		-1	-1	0	0	2	-1	-1	-1	-1	-1	-1
279.5	107.813	82.32	4	-1	1	237.025	25.0219	-0.468679	1.85938		-1	-1	0	0	2	-1	-1	-1	-1	-1	-1
198.641	105.938	82.32	4	-1	1	154.389	23.9794	-0.404938	1.85938		-1	-1	0	0	2	-1	-1	-1	-1	-1	-1
189.266	106.172	82.32	4	-1	1	144.816	23.8482	-0.381809	1.85938		-1	-1	0	0	2	-1	-1	-1	-1	-1	-1
169.813	105.938	82.32	4	-1	1	125.127	22.7686	-0.341052	1.85938		-1	-1	0	0	2	-1	-1	-1	-1	-1	-1
208.25	107.578	82.32	4	-1	1	164.231	25.6222	-0.386167	1.85938		-1	-1	0	0	2	-1	-1	-1	-1	-1	-1
149.188	106.406	81.34	4	-1	1	104.738	21.8412	-0.227824	1.85938		-1	-1	0	0	2	-1	-1	-1	-1	-1	-1
269.063	146.719	72.1662	1	-1	1	228.199	59.6719	0.0863795	1.85938		-1	-1	0	0	-1	-1	-1	-1	-1	-1	-1
257.234	146.016	71.54	1	-1	1	215.94	59.3971	0.0974858	1.85938		-1	-1	0	0	-1	-1	-1	-1	-1	-1	-1
246.922	147.188	71.54	1	-1	1	205.28	60.9078	0.100923	1.85938		-1	-1	0	0	-1	-1	-1	-1	-1	-1	-1
283.125	145.781	74.2756	1	-1	1	242.647	58.2849	0.0486367	1.85938		-1	-1	0	0	-1	-1	-1	-1	-1	-1	-1
283.125	143.906	66.0725	1	-1	1	242.535	56.0325	0.190016	1.85938		-1	-1	0	0	-1	-1	-1	-1	-1	-1	-1
205.781	146.484	71.4631	1	-1	1	162.337	60.8383	0.121424	1.85938		-1	-1	0	0	-1	-1	-1	-1	-1	-1	-1
54.7344	57.1875	93.1	1	-1	1	8.14144	27.9558	-2.43527	2		-1	-1	0	0	2	-1	-1	-1	-1	-1	-1
55.4375	107.344	80.36	1	-1	1	13.5536	25.993	0.0980259	2		-1	-1	0	0	2	-1	-1	-1	-1	-1	-1
37.5	57.6563	100.76	1	-1	1	-9.29089	30.6851	-2.20736	2		-1	-1	0	0	2	-1	-1	-1	-1	-1	-1
36.2188	96.3281	109.76	1	-1	1	-7.69966	34.5984	-0.905496	2		-1	-1	0	0	2	-1	-1	-1	-1	-1	-1
69.7344	58.5938	86.24	1	-1	1	23.4733	25.1869	-2.64608	2		-1	-1	0	0	2	-1	-1	-1	-1	-1	-1
66.5625	118.594	105.213	1	-1	1	24.5593	45.2519	-0.475985	2		-1	-1	0	0	2	-1	-1	-1	-1	-1	-1
95.0469	96.7969	43.12	1	-1	1	53.8081	35.8901	1.38994	2		-1	-1	0	0	2	-1	-1	-1	-1	-1	-1
136.875	71.0156	67.01	5	-1	1	93.6919	16.7342	2.86642	2		-1	-1	0	0	2	-1	-1	-1	-1	-1	-1
146.844	70.5469	66.64	5	-1	1	103.832	16.975	2.90321	2		-1	-1	0	0	2	-1	-1	-1	-1	-1	-1
90.8281	93.75	103.88	2	-1	1	46.5202	28.337	-1.06526	2		-1	-1	0	0	2	-1	-1	-1	-1	-1	-1
87.5469	93.5156	103.88	2	-1	1	43.3553	28.2111	-1.06276	2		-1	-1	0	0	2	-1	-1	-1	-1	-1	-1
91.2969	85.3125	103.88	2	-1	1	46.3396	26.7271	-1.36808	2		-1	-1	0	0	2	-1	-1	-1	-1	-1	-1
86.6094	76.875	107.088	2	-1	1	40.9549	30.5094	-1.63806	2		-1	-1	0	0	2	-1	-1	-1	-1	-1	-1
101.844	76.6406	103.88	2	-1	1	56.0342	28.4648	-1.70459	2		-1	-1	0	0	2	-1	-1	-1	-1	-1	-1
97.625	85.7813	106.82	2	-1	1	52.3631	29.9654	-1.3718	2		-1	-1	0	0	2	-1	-1	-1	-1	-1	-1
104.422	84.6094	106.82	2	-1	1	58.8675	30.3155	-1.42498	2		-1	-1	0	0	2	-1	-1	-1	-1	-1	-1
89.5313	61.875	105.682	1	-1	1	42.6696	36.0267	-2.06946	2		-1	-1	0	0	2	-1	-1	-1	-1	-1	-1
87.1875	113.438	83.6506	2	-1	1	45.3819	30.0477	-0.0475985	2		-1	-1	0	0	2	-1	-1	-1	-1	-1	-1
91.4063	71.9531	110.604	1	-1	1	45.1282	35.5892	-1.75902	2		-1	-1	0	0	2	-1	-1	-1	-1	-1	-1
90.8281	76.6406	112.7	1	-1	1	44.8389	36.2773	-1.61676	2		-1	-1	0	0	2	-1	-1	-1	-1	-1	-1
84.375	55.7813	115.057	1	-1	1	36.6422	46.7131	-2.04384	2		-1	-1	0	0	2	-1	-1	-1	-1	-1	-1
50.625	133.828	75.4475	1	-1	1	11.1763	52.8201	0.22856	2		-1	-1	0	0	-1	-1	-1	-1	-1	-1	-1
48.6406	78.75	90.16	1	-1	1	3.99658	11.4137	-1.58095	2		-1	-1	0	0	-1	-1	-1	-1	-1	-1	-1
54.7344	86.7188	90.16	1	-1	1	10.7302	12.7309	-0.963621	2		-1	-1	0	0	-1	-1	-1	-1	-1	-1	-1
58.25	85.7813	92.145	2	-1	1	14.0714	14.2693	-1.10572	2		-1	-1	0	0	-1	-1	-1	-1	-1	-1	-1
63.7969	92.0313	90.16	3	-1	1	20.1976	15.5236	-0.706621	2		-1	-1	0	0	-1	-1	-1	-1	-1	-1	-1
56.8438	78.0469	90.16	1	-1	1	12.1054	12.0527	-1.68958	2		-1	-1	0	0	-1	-1	-1	-1	-1	-1	-1
49.5781	71.9531	90.16	1	-1	1	4.36174	14.3141	-2.07065	2		-1	-1	0	0	-1	-1	-1	-1	-1	-1	-1
56.6094	66.7969	90.16	1	-1	1	10.9314	18.5771	-2.30566	2		-1	-1	0	0	-1	-1	-1	-1	-1	-1	-1
32	97.0313	67.62	1	-1	1	-10.1259	21.255	0.761194	2		-1	-1	0	0	-1	-1	-1	-1	-1	-1	-1
32.2344	60.9375	120.54	1	-1	1	-15.0646	44.8066	-1.82741	2		-1	-1	0	0	-1	-1	-1	-1	-1	-1	-1
32	69.1406	120.54	1	-1	1	-14.6121	42.133	-1.64916	2		-1	-1	0	0	-1	-1	-1	-1	-1	-1	-1
19.6875	90	121.854	1	-1	1	-25.1807	43.3602	-1.13331	2		-1	-1	0	0	-1	-1	-1	-1	-1	-1	-1
19.6875	91.875	103.338	1	-1	1	-24.2702	26.9103	-0.878756	2		-1	-1	0	0	-1	-1	-1	-1	-1	-1	-1
19.1094	75	103.88	1	-1	1	-26.2787	23.9589	-1.54179	2		-1	-1	0	0	-1	-1	-1	-1	-1	-1	-1
23.3281	83.4375	103.88	1	-1	1	-21.3728	24.411	-1.20748	2		-1	-1	0	0	-1	-1	-1	-1	-1	-1	-1
24.9688	60.9375	103.88	1	-1	1	-21.6205	29.7997	-2.04313	2		-1	-1	0	0	-1	-1	-1	-1	-1	-1	-1
57.0781	49.2188	105.27	1	-1	1	9.31337	41.6968	-2.28354	2		-1	-1	0	0	-1	-1	-1	-1	-1	-1	-1
31.5313	43.8281	103.88	1	-1	1	-16.5169	42.8134	-2.37557	2		-1	-1	0	0	-1	-1	-1	-1	-1	-1	-1
28.9531	36.5625	103.88	1	-1	1	-19.6914	48.7125	-2.45895	2		-1	-1	0	0	-1	-1	-1	-1	-1	-1	-1
15	110.391	105.447	1	-1	1	-27.4752	41.0406	-0.495682	2		-1	-1	0	0	-1	-1	-1	-1	-1	-1	-1
49.7344	56.4063	75.46	1	-1	1	3.81587	24.6	-3.11555	2		-1	-1	0	0	-1	-1	-1	-1	-1	-1	-1
57.2344	53.5938	68.6	1	-1	1	11.3275	29.5415	2.96261	2		-1	-1	0	0	-1	-1	-1	-1	-1	-1	-1
66.6094	51.0938	70.56	1	-1	1	20.373	32.0012	3.0662	1.90625		-1	-1	0	0	-1	-1	-1	-1	-1	-1	-1
63.1719	43.5938	67.62	1	-1	1	16.4431	39.7437	3.03396	1.85938		-1	-1	0	0	2	-1	-1	-1	-1	-1	-1
38.1719	74.2188	67.62	1	-1	1	-5.8881	13.0073	2.18491	2		-1	-1	0	0	-1	-1	-1	-1	-1	-1	-1
34.7344	81.7188	65.66	1	-1	1	-8.60386	13.9587	1.58341	2		-1	-1	0	0	-1	-1	-1	-1	-1	-1	-1
31.9219	77.9688	59.78	1	-1	1	-11.4783	19.8454	1.80569	2		-1	-1	0	0	-1	-1	-1	-1	-1	-1	-1
32.5469	88.5938	57.82	1	-1	1	-9.88792	23.5493	1.33711	2		-1	-1	0	0	-1	-1	-1	-1	-1	-1	-1
37.8594	87.3438	54.88	1	-1	1	-4.58327	25.5379	1.43963	2		-1	-1	0	0	-1	-1	-1	-1	-1	-1	-1
9.10938	100.156	53.9	1	-1	1	-32.0976	34.8738	1.03064	2		-1	-1	0	0	-1	-1	-1	-1	-1	-1	-1
21.2969	113.281	52.92	1	-1	1	-18.8256	43.9462	0.827558	2		-1	-1	0	0	-1	-1	-1	-1	-1	-1	-1
45.3594	116.094	60.76	1	-1	1	5.04861	39.8606	0.640038	2		-1	-1	0	0	-1	-1	-1	-1	-1	-1	-1
108.484	122.031	57.82	1	-1	1	67.5708	40.881	0.626942	2		-1	-1	0	0	-1	-1	-1	-1	-1	-1	-1
100.984	122.031	57.82	1	-1	1	60.3893	41.4318	0.633097	2		-1	-1	0	0	-1	-1	-1	-1	-1	-1	-1
106.609	121.719	49.98	1	-1	1	66.2454	44.8093	0.788542	2		-1	-1	0	0	-1	-1	-1	-1	-1	-1	-1
85.9844	111.406	42.14	1	-1	1	45.8481	44.5549	1.07391	2		-1	-1	0	0	-1	-1	-1	-1	-1	-1	-1
106.609	119.219	47.04	1	-1	1	66.3137	44.6678	0.87472	1.85938		-1	-1	0	0	-1	-1	-1	-1	-1	-1	-1
117.547	116.094	40.18	1	-1	1	77.3123	46.4804	1.0243	1.85938		-1	-1	0	0	-1	-1	-1	-1	-1	-1	-1
127.234	117.031	40.18	1	-1	1	86.775	46.3927	1.002	1.71875		-1	-1	0	0	-1	-1	-1	-1	-1	-1	-1
156.297	118.594	36.26	1	-1	1	115.299	48.5481	0.998224	2		-1	-1	0	0	-1	-1	-1	-1	-1	-1	-1
137.859	111.719	34.3	1	-1	1	97.5695	47.0842	1.15881	1.90625		-1	-1	0	0	-1	-1	-1	-1	-1	-1	-1
176.922	126.406	35.28	1	-1	1	135.403	53.8805	0.879045	1.85938		-1	-1	0	0	-1	-1	-1	-1	-1	-1	-1
127.859	64.2188	37.24	1	-1	1	86.8287	43.3979	2.26036	1.76563		-1	-1	0	0	-1	-1	-1	-1	-1	-1	-1
122.547	64.2188	37.24	1	-1	1	81.2191	43.7073	2.25368	1.85938		-1	-1	0	0	-1	-1	-1	-1	-1	-1	-1
125.047	68.9063	37.24	1	-1	1	83.9611	41.4147	2.15885	1.85938		-1	-1	1	0	-1	-1	-1	-1	-1	-1	-1
84.4219	83.9063	42.14	1	-1	1	42.0125	35.2735	1.73211	2		-1	-1	1	0	-1	-1	-1	-1	-1	-1	-1
57.8594	67.3438	49	1	-1	1	13.8973	32.7584	2.18295	2		-1	-1	0	0	-1	-1	-1	-1	-1	-1	-1
46.6094	88.2813	62.72	1	-1	1	3.88805	17.9514	1.29511	2		-1	-1	0	0	-1	-1	-1	-1	-1	-1	-1
75.0469	116.406	64.68	1	-1	1	34.474	35.7732	0.54023	1.76563		-1	-1	1	0	-1	-1	-1	-1	-1	-1	-1
89.1094	116.406	61.74	1	-1	1	48.4029	35.6541	0.612815	1.85938		-1	-1	1	0	-1	-1	-1	-1	-1	-1	-1
80.0469	73.9063	65.66	4	-1	1	35.8591	15.262	2.40511	2		-1	-1	1	0	-1	-1	-1	-1	-1	-1	-1
73.7969	76.4063	74.48	5	-1	1	29.4862	7.28664	2.82115	2		-1	-1	1	0	-1	-1	-1	-1	-1	-1	-1
63.4844	77.3438	75.46	3	-1	1	19.2568	5.44572	2.75773	2		-1	-1	1	0	-1	-1	-1	-1	-1	-1	-1
62.8125	96.4063	64.02	2	-1	1	20.6474	20.2649	0.94627	2		-1	-1	0	0	-1	-1	-1	-1	-1	-1	-1
130.359	112.969	71.54	3	-1	1	87.2953	27.0246	0.274604	2		-1	-1	1	0	-1	-1	-1	-1	-1	-1	-1
112.547	53.9063	70.56	2	-1	1	67.7131	32.1243	3.13505	2		-1	-1	1	0	-1	-1	-1	-1	-1	-1	-1
62.8594	83.2813	71.52	7	-1	1	19.2914	6.92336	1.54306	2		-1	-1	0	0	-1	-1	-1	-1	-1	-1	-1
53.7969	87.3438	70.56	1	-1	1	10.6469	10.168	1.08924	2		-1	-1	0	0	-1	-1	-1	-1	-1	-1	-1
45.3594	87.9688	71.54	1	-1	1	2.2583	10.5598	0.95229	2		-1	-1	0	0	-1	-1	-1	-1	-1	-1	-1
57.8594	104.844	62.72	1	-1	1	16.4741	28.0516	0.761898	2		-1	-1	1	0	-1	-1	-1	-1	-1	-1	-1
47.8594	107.344	62.72	1	-1	1	6.72642	31.0687	0.712569	2		-1	-1	0	0	-1	-1	-1	-1	-1	-1	-1
50.3594	104.531	62.72	1	-1	1	8.98044	28.4846	0.764551	2		-1	-1	0	0	-1	-1	-1	-1	-1	-1	-1
45.9844	106.406	70.56	1	-1	1	4.46201	27.1072	0.481264	2		-1	-1	0	0	-1	-1	-1	-1	-1	-1	-1
36.6094	80.4688	73.5	1	-1	1	-7.16064	5.93477	1.61404	2		-1	-1	0	0	-1	-1	-1	-1	-1	-1	-1
55.9844	75.7813	80.36	2	-1	1	11.4592	5.83199	-2.67194	2		-1	-1	0	0	-1	-1	-1	-1	-1	-1	-1
50.6719	74.8438	80.36	1	-1	1	6.09137	6.24457	-2.72863	2		-1	-1	0	0	-1	-1	-1	-1	-1	-1	-1
68.7969	65.1563	91.14	2	-1	1	22.8891	21.5757	-2.32853	2		-1	-1	0	0	2	-1	-1	-1	-1	-1	-1
79.7344	58.9063	80.36	2	-1	1	33.6954	24.514	-2.86568	2		-1	-1	1	0	-1	-1	-1	-1	-1	-1	-1
60	82.0313	79.645	7	-1	1	16.0091	1.24641	-1.14228	2		-1	-1	0	0	-1	-1	-1	-1	-1	-1	-1
58.5938	87.3438	86.52	7	-1	1	14.7733	9.8711	-0.784343	2		-1	-1	0	0	-1	-1	-1	-1	-1	-1	-1
58.5938	92.0313	92.145	2	-1	1	14.9362	17.1805	-0.753592	2		-1	-1	0	0	-1	-1	-1	-1	-1	-1	-1
89.7344	105.469	95.06	2	-1	1	46.725	27.7541	-0.534088	2		-1	-1	0	0	-1	-1	-1	-1	-1	-1	-1
82.2344	104.531	95.06	2	-1	1	39.4008	27.3014	-0.53272	2		-1	-1	0	0	-1	-1	-1	-1	-1	-1	-1
75.0469	101.406	93.1	2	-1	1	32.063	23.9236	-0.528073	2		-1	-1	1	0	-1	-1	-1	-1	-1	-1	-1
69.4219	101.094	91.2075	2	-1	1	26.5133	22.7538	-0.451777	2		-1	-1	0	0	-1	-1	-1	-1	-1	-1	-1
63.7969	97.0313	88.2	2	-1	1	20.6954	17.965	-0.420058	2		-1	-1	0	0	-1	-1	-1	-1	-1	-1	-1
83.4844	116.406	79.38	2	-1	1	42.2601	32.675	0.106535	2		-1	-1	0	0	-1	-1	-1	-1	-1	-1	-1
75.0469	114.219	79.38	2	-1	1	33.6927	31.1834	0.114851	2		-1	-1	0	0	-1	-1	-1	-1	-1	-1	-1
67.2344	103.906	79.645	2	-1	1	25.0411	21.574	0.0951584	2		-1	-1	0	0	-1	-1	-1	-1	-1	-1	-1
60.6719	106.719	79.38	2	-1	1	18.753	24.8906	0.125868	2		-1	-1	0	0	-1	-1	-1	-1	-1	-1	-1
55.6719	101.094	82.4575	2	-1	1	13.179	20.0649	-0.0277657	2		-1	-1	0	0	-1	-1	-1	-1	-1	-1	-1
95.6719	69.8438	49.98	2	-1	1	52.1954	30.7448	2.23707	2		-1	-1	1	0	-1	-1	-1	-1	-1	-1	-1
84.1094	71.4063	50.96	2	-1	1	40.2934	29.2219	2.1706	2		-1	-1	0	0	2	-1	-1	-1	-1	-1	-1
113.484	64.8438	52.92	2	-1	1	70.444	30.9679	2.47019	2		-1	-1	1	0	-1	-1	-1	-1	-1	-1	-1
154.734	38.9063	72.52	1	-1	1	111.594	47.23	-2.98264	2		-1	-1	0	0	-1	-1	-1	-1	-1	-1	-1
138.172	41.7188	72.52	1	-1	1	94.3861	44.4977	-3.01407	2		-1	-1	0	0	-1	-1	-1	-1	-1	-1	-1
127.859	41.4063	72.52	1	-1	1	83.4264	44.7176	-3.03244	2		-1	-1	0	0	-1	-1	-1	-1	-1	-1	-1
85.9844	41.4063	89.18	1	-1	1	38.0962	43.9059	-2.70528	2		-1	-1	0	0	-1	-1	-1	-1	-1	-1	-1
95.3594	42.6563	89.18	1	-1	1	47.8064	43.5487	-2.69386	2		-1	-1	0	0	-1	-1	-1	-1	-1	-1	-1
102.547	41.0938	89.18	1	-1	1	55.2361	45.6296	-2.6994	2		-1	-1	0	0	-1	-1	-1	-1	-1	-1	-1
109.422	42.0313	89.18	1	-1	1	62.5482	45.2309	-2.68817	2		-1	-1	0	0	-1	-1	-1	-1	-1	-1	-1
117.234	41.7188	89.18	1	-1	1	70.7987	46.0245	-2.68222	2		-1	-1	0	0	-1	-1	-1	-1	-1	-1	-1
124.109	42.6563	89.18	1	-1	1	78.1111	45.5023	-2.66755	2		-1	-1	0	0	-1	-1	-1	-1	-1	-1	-1
132.547	41.0938	89.18	1	-1	1	86.9939	47.3625	-2.66588	2		-1	-1	0	0	-1	-1	-1	-1	-1	-1	-1
138.484	40.4688	89.18	1	-1	1	93.2417	48.1681	-2.66074	2		-1	-1	0	0	-1	-1	-1	-1	-1	-1	-1
186.609	37.0313	79.38	1	-1	1	142.922	49.5895	-2.79482	2		-1	-1	0	0	-1	-1	-1	-1	-1	-1	-1
201.609	36.0938	79.38	1	-1	1	157.613	50.6061	-2.78094	2		-1	-1	0	0	-1	-1	-1	-1	-1	-1	-1
175.359	49.2188	78.4	2	-1	1	131.728	37.4128	-2.78104	2		-1	-1	1	0	-1	-1	-1	-1	-1	-1	-1
218.172	46.7188	77.42	2	-1	1	173.942	40.0434	-2.75795	2		-1	-1	1	0	-1	-1	-1	-1	-1	-1	-1
64.1094	87.3438	78.4	6	-1	1	20.5955	5.27575	0.140689	1.76563		-1	-1	1	0	-1	-1	-1	-1	-1	-1	-1
143.906	118.594	82.145	2	-1	1	99.5013	33.5161	-0.09977	2		-1	-1	1	0	-1	-1	-1	-1	-1	-1	-1
133.484	72.3438	80.36	5	-1	1	89.1391	15.0387	-2.57308	2		-1	-1	1	0	-1	-1	-1	-1	-1	-1	-1
106.406	81.0938	79.9575	6	-1	1	62.1817	5.52827	-2.26777	2		-1	-1	1	0	-1	-1	-1	-1	-1	-1	-1
98.4375	91.0938	80.27	6	-1	1	54.8544	7.16858	-0.342927	2		-1	-1	1	0	-1	-1	-1	-1	-1	-1	-1
80.6719	89.5313	80.36	6	-1	1	37.1894	6.67511	-0.262215	2		-1	-1	1	0	-1	-1	-1	-1	-1	-1	-1
4.42188	82.3438	69.58	1	-1	1	-38.8923	12.3002	1.29252	2		-1	-1	0	0	-1	-1	-1	-1	-1	-1	-1
6.6875	73.5938	69.58	1	-1	1	-37.3681	11.6235	2.05361	2		-1	-1	0	0	-1	-1	-1	-1	-1	-1	-1
14.1875	101.094	87.22	1	-1	1	-28.3194	24.1819	-0.124855	2		-1	-1	0	0	-1	-1	-1	-1	-1	-1	-1
39.1875	118.281	85.26	1	-1	1	-1.91096	38.6712	0.00981252	2		-1	-1	0	0	-1	-1	-1	-1	-1	-1	-1
47	114.219	101.92	1	-1	1	4.84983	40.6483	-0.435368	2		-1	-1	0	0	-1	-1	-1	-1	-1	-1	-1
38.875	109.531	101.92	1	-1	1	-3.63188	37.217	-0.488662	2		-1	-1	0	0	-1	-1	-1	-1	-1	-1	-1
28.5625	107.969	101.92	1	-1	1	-14.0303	36.4087	-0.491072	2		-1	-1	0	0	-1	-1	-1	-1	-1	-1	-1
26.6875	101.094	107.8	1	-1	1	-16.7114	35.7135	-0.736728	2		-1	-1	0	0	-1	-1	-1	-1	-1	-1	-1
26.6875	94.2188	108.78	1	-1	1	-17.3261	32.7722	-0.920424	2		-1	-1	0	0	-1	-1	-1	-1	-1	-1	-1
36.375	62.0313	108.78	1	-1	1	-10.3717	34.1844	-1.94651	2		-1	-1	0	0	-1	-1	-1	-1	-1	-1	-1
20.75	70.7813	108.78	1	-1	1	-25.1974	29.6744	-1.66423	2		-1	-1	0	0	-1	-1	-1	-1	-1	-1	-1
51.0625	57.0313	112.7	1	-1	1	3.67454	41.3486	-2.01904	2		-1	-1	0	0	-1	-1	-1	-1	-1	-1	-1
77	55.4688	114.66	1	-1	1	29.2892	45.9718	-2.04754	2		-1	-1	0	0	-1	-1	-1	-1	-1	-1	-1
67	57.3438	114.66	1	-1	1	19.4893	44.0722	-2.00394	2		-1	-1	0	0	-1	-1	-1	-1	-1	-1	-1
60.75	57.9688	114.66	1	-1	1	13.3187	43.2257	-1.98537	2		-1	-1	0	0	-1	-1	-1	-1	-1	-1	-1
52.9375	66.0938	114.66	1	-1	1	6.21933	38.8477	-1.80046	2		-1	-1	0	0	-1	-1	-1	-1	-1	-1	-1
47.3125	67.0313	114.66	1	-1	1	0.697087	38.118	-1.76877	2		-1	-1	0	0	-1	-1	-1	-1	-1	-1	-1
47.3125	83.5938	114.66	1	-1	1	2.08185	35.8014	-1.32296	2		-1	-1	0	0	-1	-1	-1	-1	-1	-1	-1
47	76.7188	114.66	1	-1	1	1.1959	35.855	-1.51375	2		-1	-1	0	0	-1	-1	-1	-1	-1	-1	-1
73.25	87.0313	115.64	1	-1	1	28.1545	37.9561	-1.2944	2		-1	-1	1	0	-1	-1	-1	-1	-1	-1	-1
73.25	105.469	118.58	1	-1	1	29.5763	46.56	-0.898509	2		-1	-1	0	0	-1	-1	-1	-1	-1	-1	-1
54.1875	95.1563	116.62	1	-1	1	9.814	40.4182	-1.05413	2		-1	-1	0	0	-1	-1	-1	-1	-1	-1	-1
46.6875	94.5313	116.62	1	-1	1	2.29424	40.1323	-1.05139	2		-1	-1	0	0	-1	-1	-1	-1	-1	-1	-1
55.4375	110.156	112.7	1	-1	1	12.4723	44.6228	-0.704561	2		-1	-1	0	0	-1	-1	-1	-1	-1	-1	-1
74.1875	114.531	112.7	1	-1	1	31.5068	47.0415	-0.66969	2		-1	-1	0	0	-1	-1	-1	-1	-1	-1	-1
84.5	113.281	112.7	1	-1	1	41.6701	45.9729	-0.709882	2		-1	-1	0	0	-1	-1	-1	-1	-1	-1	-1
92.9375	112.656	112.7	1	-1	1	49.4662	45.4499	-0.736865	2		-1	-1	0	0	-1	-1	-1	-1	-1	-1	-1
67.9375	128.906	105.84	1	-1	1	26.765	54.0952	-0.37352	2		-1	-1	0	0	-1	-1	-1	-1	-1	-1	-1
97	132.344	105.84	1	-1	1	54.7609	55.7154	-0.383256	2		-1	-1	0	0	-1	-1	-1	-1	-1	-1	-1
101.688	127.969	115.64	1	-1	1	58.2625	58.0245	-0.573981	2		-1	-1	0	0	-1	-1	-1	-1	-1	-1	-1
47.9375	120.781	111.72	1	-1	1	5.93302	51.7479	-0.521747	2		-1	-1	0	0	-1	-1	-1	-1	-1	-1	-1
70.75	79.8438	121.52	1	-1	1	24.825	43.5598	-1.46857	2		-1	-1	0	0	-1	-1	-1	-1	-1	-1	-1
75.75	78.9063	121.52	1	-1	1	29.725	43.865	-1.49906	2		-1	-1	0	0	-1	-1	-1	-1	-1	-1	-1
86.375	82.9688	121.52	1	-1	1	40.6436	44.1272	-1.42678	2		-1	-1	0	0	-1	-1	-1	-1	-1	-1	-1
97.625	82.9688	121.52	1	-1	1	51.4601	44.656	-1.44577	2		-1	-1	0	0	-1	-1	-1	-1	-1	-1	-1
111.375	82.9688	122.5	1	-1	1	64.5736	46.4445	-1.46183	2		-1	-1	0	0	-1	-1	-1	-1	-1	-1	-1
121.375	81.4063	122.5	1	-1	1	74.1286	47.2573	-1.50296	2		-1	-1	0	0	-1	-1	-1	-1	-1	-1	-1
132.938	76.4063	119.56	1	-1	1	85.4915	46.0268	-1.62213	2		-1	-1	0	0	-1	-1	-1	-1	-1	-1	-1
144.5	73.5938	119.56	1	-1	1	96.9363	47.644	-1.67791	2		-1	-1	0	0	2	-1	-1	-1	-1	-1	-1
157.938	73.2813	120.54	1	-1	1	110.392	49.7523	-1.67154	2		-1	-1	0	0	-1	-1	-1	-1	-1	-1	-1
169.5	77.3438	120.54	1	-1	1	122.142	49.7706	-1.58485	2		-1	-1	0	0	-1	-1	-1	-1	-1	-1	-1
137	84.5313	121.52	1	-1	1	89.4337	47.304	-1.44434	2		-1	-1	0	0	-1	-1	-1	-1	-1	-1	-1
141.688	82.6563	121.52	1	-1	1	94.0161	47.7938	-1.48415	2		-1	-1	0	0	-1	-1	-1	-1	-1	-1	-1
147	80.7813	121.52	1	-1	1	99.2705	48.4142	-1.52239	2		-1	-1	0	0	-1	-1	-1	-1	-1	-1	-1
153.875	81.4063	121.52	1	-1	1	106.14	48.9265	-1.50786	2		-1	-1	0	0	-1	-1	-1	-1	-1	-1	-1
159.813	84.8438	121.52	1	-1	1	112.093	49.2111	-1.43628	2		-1	-1	0	0	-1	-1	-1	-1	-1	-1	-1
167	87.0313	121.52	1	-1	1	119.372	49.7967	-1.39027	2		-1	-1	0	0	-1	-1	-1	-1	-1	-1	-1
117.313	97.3438	119.56	1	-1	1	71.0164	45.362	-1.14945	2		-1	-1	0	0	2	-1	-1	-1	-1	-1	-1
126.063	96.4063	119.56	1	-1	1	79.2654	45.6752	-1.179	2		-1	-1	0	0	-1	-1	-1	-1	-1	-1	-1
132.313	94.5313	119.56	1	-1	1	85.191	45.732	-1.22435	2		-1	-1	0	0	-1	-1	-1	-1	-1	-1	-1
139.188	92.6563	119.56	1	-1	1	91.7999	45.9617	-1.26869	2		-1	-1	0	0	-1	-1	-1	-1	-1	-1	-1
146.688	91.4063	119.56	1	-1	1	99.1238	46.4227	-1.29798	2		-1	-1	0	0	-1	-1	-1	-1	-1	-1	-1
157	92.3438	119.56	1	-1	1	109.356	47.4104	-1.27941	2		-1	-1	0	0	-1	-1	-1	-1	-1	-1	-1
167.313	94.8438	119.56	1	-1	1	119.75	48.6619	-1.22833	2		-1	-1	0	0	-1	-1	-1	-1	-1	-1	-1
131.688	67.9688	118.58	1	-1	1	84.179	47.5048	-1.80104	2		-1	-1	0	0	-1	-1	-1	-1	-1	-1	-1
140.438	65.7813	118.58	1	-1	1	92.9093	49.0715	-1.83886	2		-1	-1	0	0	-1	-1	-1	-1	-1	-1	-1
150.438	64.2188	118.58	1	-1	1	103.014	50.5042	-1.86021	2		-1	-1	0	0	-1	-1	-1	-1	-1	-1	-1
162.938	66.7188	118.58	1	-1	1	115.726	50.3961	-1.80438	2		-1	-1	0	0	-1	-1	-1	-1	-1	-1	-1
168.25	67.6563	118.58	1	-1	1	121.153	50.4209	-1.7826	2		-1	-1	0	0	-1	-1	-1	-1	-1	-1	-1
183.25	73.9063	123.48	1	-1	1	136.151	54.2984	-1.63094	2		-1	-1	0	0	-1	-1	-1	-1	-1	-1	-1
176.063	64.8438	123.48	1	-1	1	128.835	56.5268	-1.79174	2		-1	-1	0	0	-1	-1	-1	-1	-1	-1	-1
183.25	66.4063	123.48	1	-1	1	136.24	56.4213	-1.76097	2		-1	-1	0	0	-1	-1	-1	-1	-1	-1	-1
192.313	68.2813	123.48	1	-1	1	145.604	56.3442	-1.72441	2		-1	-1	0	0	-1	-1	-1	-1	-1	-1	-1
197.938	69.8438	123.48	1	-1	1	151.425	56.1915	-1.69544	2		-1	-1	0	0	-1	-1	-1	-1	-1	-1	-1
198.875	74.5313	123.48	1	-1	1	152.379	55.1038	-1.61334	2		-1	-1	0	0	-1	-1	-1	-1	-1	-1	-1
159.5	36.4063	116.62	1	-1	1	112.711	66.582	-2.25306	2		-1	-1	0	0	-1	-1	-1	-1	-1	-1	-1
149.813	32.0313	116.62	1	-1	1	102.667	69.4495	-2.30463	2		-1	-1	0	0	-1	-1	-1	-1	-1	-1	-1
142	31.4063	116.62	1	-1	1	94.4699	69.5267	-2.31771	2		-1	-1	0	0	-1	-1	-1	-1	-1	-1	-1
202.313	37.0313	118.58	1	-1	1	156.273	69.236	-2.18919	2		-1	-1	0	0	2	-1	-1	-1	-1	-1	-1
190.75	36.7188	118.58	1	-1	1	144.566	69.0221	-2.19981	2		-1	-1	0	0	2	-1	-1	-1	-1	-1	-1
88.5625	105.469	117.6	1	-1	1	44.6765	45.6416	-0.919171	2		-1	-1	0	0	-1	-1	-1	-1	-1	-1	-1
94.5	106.094	117.6	1	-1	1	50.2524	45.9646	-0.918536	2		-1	-1	0	0	-1	-1	-1	-1	-1	-1	-1
99.8125	107.031	117.6	1	-1	1	55.2493	46.4759	-0.910334	2		-1	-1	0	0	-1	-1	-1	-1	-1	-1	-1
104.5	107.031	117.6	1	-1	1	59.5998	46.5701	-0.918397	2		-1	-1	0	0	-1	-1	-1	-1	-1	-1	-1
112.313	104.844	117.6	1	-1	1	66.757	45.8399	-0.973242	2		-1	-1	0	0	-1	-1	-1	-1	-1	-1	-1
122	103.906	117.6	1	-1	1	75.776	45.9106	-1.00545	2		-1	-1	0	0	-1	-1	-1	-1	-1	-1	-1
132.938	102.656	117.6	1	-1	1	86.0688	46.1154	-1.04293	2		-1	-1	0	0	2	-1	-1	-1	-1	-1	-1
67.625	54.8438	123.48	1	-1	1	19.5435	52.876	-1.94955	2		-1	-1	0	0	-1	-1	-1	-1	-1	-1	-1
50.4375	57.3438	123.48	1	-1	1	2.63955	50.34	-1.88997	2		-1	-1	0	0	-1	-1	-1	-1	-1	-1	-1
32.9375	61.4063	124.46	1	-1	1	-14.4849	48.28	-1.78624	2		-1	-1	0	0	-1	-1	-1	-1	-1	-1	-1
31.0625	69.5313	124.46	1	-1	1	-15.6724	45.8063	-1.61881	2		-1	-1	0	0	-1	-1	-1	-1	-1	-1	-1
36.375	80.7813	124.46	1	-1	1	-9.44234	45.0312	-1.38183	2		-1	-1	0	0	-1	-1	-1	-1	-1	-1	-1
36.0625	94.8438	124.46	1	-1	1	-8.57774	47.5154	-1.08168	2		-1	-1	0	0	-1	-1	-1	-1	-1	-1	-1
30.75	103.906	124.46	1	-1	1	-13.1095	51.156	-0.903623	2		-1	-1	0	0	-1	-1	-1	-1	-1	-1	-1
59.8125	117.031	127.4	1	-1	1	16.8047	60.3674	-0.781442	2		-1	-1	0	0	-1	-1	-1	-1	-1	-1	-1
52.9375	107.031	127.4	1	-1	1	9.12344	55.1403	-0.917171	2		-1	-1	0	0	-1	-1	-1	-1	-1	-1	-1
61.0625	99.8438	127.4	1	-1	1	16.6123	52.2177	-1.05329	2		-1	-1	0	0	-1	-1	-1	-1	-1	-1	-1
55.4375	92.9688	127.4	1	-1	1	10.4369	50.1328	-1.1715	2		-1	-1	0	0	-1	-1	-1	-1	-1	-1	-1
46.0625	83.5938	127.4	1	-1	1	0.318652	48.4549	-1.34232	2		-1	-1	0	0	-1	-1	-1	-1	-1	-1	-1
46.6875	76.0938	127.4	1	-1	1	0.31388	48.5658	-1.49762	2		-1	-1	0	0	-1	-1	-1	-1	-1	-1	-1
51.0625	65.4688	127.4	1	-1	1	3.78158	50.8962	-1.71316	2		-1	-1	0	0	-1	-1	-1	-1	-1	-1	-1
88.875	51.4063	128.38	1	-1	1	40.2146	60.5051	-1.97382	2		-1	-1	0	0	-1	-1	-1	-1	-1	-1	-1
78.5625	62.0313	128.38	1	-1	1	30.8351	54.8304	-1.80115	2		-1	-1	0	0	-1	-1	-1	-1	-1	-1	-1
92.3125	69.2188	128.38	1	-1	1	45.0386	53.3632	-1.6927	2		-1	-1	0	0	-1	-1	-1	-1	-1	-1	-1
92	93.2813	128.38	1	-1	1	46.5448	52.0078	-1.23354	2		-1	-1	0	0	-1	-1	-1	-1	-1	-1	-1
92	102.344	128.38	1	-1	1	47.1967	54.3167	-1.06877	2		-1	-1	0	0	-1	-1	-1	-1	-1	-1	-1
88.25	111.406	128.38	1	-1	1	44.3964	57.9472	-0.915254	2		-1	-1	0	0	-1	-1	-1	-1	-1	-1	-1
72.625	84.8438	130.34	1	-1	1	26.7509	52.4192	-1.36576	2		-1	-1	0	0	-1	-1	-1	-1	-1	-1	-1
70.4375	72.6563	130.34	1	-1	1	23.5539	53.1762	-1.59232	2		-1	-1	0	0	-1	-1	-1	-1	-1	-1	-1
106.688	83.5938	133.28	1	-1	1	59.5203	56.8789	-1.43623	2		-1	-1	0	0	-1	-1	-1	-1	-1	-1	-1
24.8125	110.156	116.62	1	-1	1	-18.1796	48.3197	-0.699609	2		-1	-1	0	0	-1	-1	-1	-1	-1	-1	-1
15.75	99.8438	116.62	1	-1	1	-28.065	42.4284	-0.865548	2		-1	-1	0	0	-1	-1	-1	-1	-1	-1	-1
9.5	89.8438	116.62	1	-1	1	-35.124	38.1737	-1.07593	2		-1	-1	0	0	-1	-1	-1	-1	-1	-1	-1
10.125	81.4063	116.62	1	-1	1	-35.2072	36.3299	-1.29837	2		-1	-1	0	0	-1	-1	-1	-1	-1	-1	-1
13.25	69.8438	116.62	1	-1	1	-33.0625	37.0637	-1.62024	2		-1	-1	0	0	-1	-1	-1	-1	-1	-1	-1
16.0625	57.6563	116.62	1	-1	1	-31.2811	41.5702	-1.91462	2		-1	-1	0	0	-1	-1	-1	-1	-1	-1	-1
1.375	96.7188	111.72	1	-1	1	-42.4396	36.7549	-0.833434	2		-1	-1	0	0	-1	-1	-1	-1	-1	-1	-1
1.45313	72.0313	111.72	1	-1	1	-44.4258	31.2054	-1.55779	2		-1	-1	0	0	-1	-1	-1	-1	-1	-1	-1
4.89063	60.7812	111.72	1	-1	1	-41.9438	34.9469	-1.88811	2		-1	-1	0	0	-1	-1	-1	-1	-1	-1	-1
9.89063	54.5313	108.082	1	-1	1	-37.34	35.7711	-2.09857	2		-1	-1	0	0	-1	-1	-1	-1	-1	-1	-1
53.3281	49.8438	103.88	1	-1	1	5.68845	39.9986	-2.29822	2		-1	-1	0	0	-1	-1	-1	-1	-1	-1	-1
48.3281	53.9063	103.88	1	-1	1	1.04978	36.4933	-2.22577	2		-1	-1	0	0	-1	-1	-1	-1	-1	-1	-1
90.8281	56.7188	104.86	1	-1	1	43.5791	38.92	-2.18797	2		-1	-1	1	0	-1	-1	-1	-1	-1	-1	-1
102.391	56.4063	104.86	1	-1	1	55.23	40.1303	-2.19894	2		-1	-1	1	0	-1	-1	-1	-1	-1	-1	-1
135.203	63.9063	103.88	2	-1	1	88.8321	36.9822	-2.05528	2		-1	-1	1	0	-1	-1	-1	-1	-1	-1	-1
142.703	68.9063	103.88	2	-1	1	96.4493	34.7751	-1.93056	2		-1	-1	1	0	-1	-1	-1	-1	-1	-1	-1
165	73.5938	110.895	2	-1	1	118.389	40.976	-1.7189	2		-1	-1	1	0	-1	-1	-1	-1	-1	-1	-1
190.828	101.719	106.82	2	-1	1	144.878	40.1665	-1.00072	2		-1	-1	1	0	-1	-1	-1	-1	-1	-1	-1
206.141	99.5313	106.82	2	-1	1	160.824	40.1659	-1.05718	2		-1	-1	1	0	-1	-1	-1	-1	-1	-1	-1
275.203	101.719	108.78	2	-1	1	232.303	43.6873	-1.0734	2		-1	-1	1	0	-1	-1	-1	-1	-1	-1	-1
85.2031	115.469	98	1	-1	1	43.0787	37.7121	-0.413063	2		-1	-1	1	0	-1	-1	-1	-1	-1	-1	-1
92.7031	115.781	97.02	1	-1	1	50.1676	37.1395	-0.40279	2		-1	-1	1	0	-1	-1	-1	-1	-1	-1	-1
88.6406	111.406	101.92	1	-1	1	45.837	36.769	-0.570709	2		-1	-1	1	0	-1	-1	-1	-1	-1	-1	-1
113.953	112.656	106.82	1	-1	1	69.2721	41.0773	-0.689976	2		-1	-1	1	0	-1	-1	-1	-1	-1	-1	-1
113.953	107.969	106.82	1	-1	1	69.0849	38.1544	-0.782458	2		-1	-1	1	0	-1	-1	-1	-1	-1	-1	-1
127.703	111.406	104.86	2	-1	1	82.2267	39.244	-0.706678	2		-1	-1	1	0	-1	-1	-1	-1	-1	-1	-1
129.578	106.719	101.92	2	-1	1	84.1275	34.1088	-0.759696	2		-1	-1	1	0	-1	-1	-1	-1	-1	-1	-1
83.3281	120.156	88.2	1	-1	1	42.0655	37.9409	-0.121503	2		-1	-1	0	0	2	-1	-1	-1	-1	-1	-1
82.7031	127.031	90.16	1	-1	1	41.9448	45.1154	-0.119388	2		-1	-1	0	0	-1	-1	-1	-1	-1	-1	-1
96.1406	127.344	93.1	1	-1	1	54.2919	45.599	-0.199449	2		-1	-1	0	0	-1	-1	-1	-1	-1	-1	-1
57.0781	116.094	106.82	1	-1	1	14.8416	44.6649	-0.520623	2		-1	-1	0	0	-1	-1	-1	-1	-1	-1	-1
85.8281	106.406	105.84	1	-1	1	42.6539	36.288	-0.737075	2		-1	-1	0	0	-1	-1	-1	-1	-1	-1	-1
94.2656	108.281	105.84	1	-1	1	50.7199	37.3534	-0.717789	2		-1	-1	0	0	-1	-1	-1	-1	-1	-1	-1
99.8906	109.531	105.84	1	-1	1	56.065	38.1348	-0.705098	2		-1	-1	0	0	-1	-1	-1	-1	-1	-1	-1
78.0156	106.719	107.457	1	-1	1	34.8786	37.9062	-0.738311	2		-1	-1	0	0	-1	-1	-1	-1	-1	-1	-1
71.1406	104.219	105.84	1	-1	1	27.8902	35.2273	-0.747721	2		-1	-1	0	0	-1	-1	-1	-1	-1	-1	-1
64.5781	104.219	105.84	1	-1	1	21.3561	35.3566	-0.730779	2		-1	-1	0	0	-1	-1	-1	-1	-1	-1	-1
59.2656	107.031	100.94	1	-1	1	16.5013	33.88	-0.560701	2		-1	-1	0	0	-1	-1	-1	-1	-1	-1	-1
51.4531	105.469	100.94	1	-1	1	8.59198	32.9931	-0.571647	2		-1	-1	0	0	-1	-1	-1	-1	-1	-1	-1
51.4531	99.8438	100.94	1	-1	1	8.12168	29.0799	-0.701633	2		-1	-1	0	0	-1	-1	-1	-1	-1	-1	-1
53.3281	92.9688	94.08	1	-1	1	9.693	19.3843	-0.75099	2		-1	-1	0	0	2	-1	-1	-1	-1	-1	-1
78.9531	112.656	102.9	1	-1	1	36.494	38.6859	-0.546194	2		-1	-1	0	0	2	-1	-1	-1	-1	-1	-1
176.141	92.6563	20.58	1	-1	1	136.03	50.6343	1.59671	2		-1	-1	0	0	2	-1	-1	-1	-1	-1	-1
131.453	80.4688	28.42	1	-1	1	91.5053	46.3176	1.85486	2		-1	-1	0	0	-1	-1	-1	-1	-1	-1	-1
121.766	80.7813	28.42	1	-1	1	81.5183	47.0317	1.84318	2		-1	-1	0	0	-1	-1	-1	-1	-1	-1	-1
113.016	77.0313	28.42	1	-1	1	72.2369	48.1768	1.91369	2		-1	-1	0	0	-1	-1	-1	-1	-1	-1	-1
124.891	75.4688	28.42	1	-1	1	84.6557	47.6915	1.95595	2		-1	-1	0	0	-1	-1	-1	-1	-1	-1	-1
122.078	72.3438	28.42	1	-1	1	81.6416	48.6765	2.01646	2		-1	-1	0	0	-1	-1	-1	-1	-1	-1	-1
115.828	72.0313	28.42	1	-1	1	75.0246	49.1622	2.01657	2		-1	-1	0	0	-1	-1	-1	-1	-1	-1	-1
126.453	67.6563	29.4	1	-1	1	86.0683	49.0008	2.11752	2		-1	-1	0	0	-1	-1	-1	-1	-1	-1	-1
116.766	69.2188	29.4	1	-1	1	75.848	49.0495	2.07815	2		-1	-1	0	0	-1	-1	-1	-1	-1	-1	-1
107.391	69.5313	29.4	1	-1	1	65.8443	49.4271	2.06073	2		-1	-1	0	0	-1	-1	-1	-1	-1	-1	-1
105.203	75.7813	31.36	1	-1	1	63.7162	45.977	1.94226	2		-1	-1	0	0	-1	-1	-1	-1	-1	-1	-1
100.516	71.0938	33.32	1	-1	1	58.3396	45.4945	2.045	2		-1	-1	0	0	-1	-1	-1	-1	-1	-1	-1
92.0781	70.1563	33.32	1	-1	1	49.2959	46.0295	2.04955	2		-1	-1	0	0	-1	-1	-1	-1	-1	-1	-1
90.8281	76.7188	33.32	1	-1	1	48.4893	44.4717	1.90665	2		-1	-1	0	0	-1	-1	-1	-1	-1	-1	-1
80.8281	78.5938	35.28	1	-1	1	38.2656	42.568	1.85043	2		-1	-1	0	0	-1	-1	-1	-1	-1	-1	-1
75.2031	77.3438	35.28	1	-1	1	32.5605	42.8935	1.86778	2		-1	-1	0	0	-1	-1	-1	-1	-1	-1	-1
4.57813	68.9063	56.84	1	-1	1	-39.3416	25.2176	2.06438	2		-1	-1	0	0	-1	-1	-1	-1	-1	-1	-1
115.203	62.3438	34.3	1	-1	1	73.5504	47.5495	2.24775	2		-1	-1	0	0	-1	-1	-1	-1	-1	-1	-1
106.453	62.6562	34.3	1	-1	1	64.1377	47.7246	2.22924	2		-1	-1	0	0	-1	-1	-1	-1	-1	-1	-1
94.8906	62.9688	38.22	1	-1	1	51.4872	44.3707	2.24389	2		-1	-1	0	0	-1	-1	-1	-1	-1	-1	-1
107.391	48.9063	48.02	1	-1	1	63.4642	46.1134	2.64537	2		-1	-1	0	0	-1	-1	-1	-1	-1	-1	-1
117.703	46.7188	48.02	1	-1	1	74.6069	47.8196	2.69003	2		-1	-1	0	0	-1	-1	-1	-1	-1	-1	-1
118.953	42.3438	39.2	1	-1	1	76.5254	56.6385	2.60915	2		-1	-1	0	0	-1	-1	-1	-1	-1	-1	-1
93.3281	41.7188	39.2	1	-1	1	48.0518	57.0799	2.58062	2		-1	-1	0	0	-1	-1	-1	-1	-1	-1	-1
78.0156	85.1563	35.28	1	-1	1	36.014	42.4271	1.69081	2		-1	-1	0	0	-1	-1	-1	-1	-1	-1	-1
149.891	89.2188	26.46	1	-1	1	110.148	46.4648	1.6653	2		-1	-1	0	0	-1	-1	-1	-1	-1	-1	-1
149.578	84.5313	26.46	1	-1	1	109.882	46.4178	1.76624	2		-1	-1	0	0	-1	-1	-1	-1	-1	-1	-1
152.078	95.7813	26.46	1	-1	1	112.232	47.1779	1.52549	2		-1	-1	1	0	-1	-1	-1	-1	-1	-1	-1
166.141	103.281	23.52	1	-1	1	126.042	51.0081	1.38528	2		-1	-1	0	0	-1	-1	-1	-1	-1	-1	-1
167.078	96.7188	23.52	1	-1	1	127.034	49.1004	1.51054	2		-1	-1	1	0	-1	-1	-1	-1	-1	-1	-1
227.703	86.7188	23.52	2	-1	1	185.567	44.7006	1.71577	2		-1	-1	1	0	-1	-1	-1	-1	-1	-1	-1
266.141	88.2813	21.56	2	-1	1	223.07	45.9883	1.70758	2		-1	-1	1	0	-1	-1	-1	-1	-1	-1	-1
162.391	77.6563	22.54	1	-1	1	122.818	49.9463	1.8992	2		-1	-1	0	0	-1	-1	-1	-1	-1	-1	-1
153.328	79.2188	23.52	1	-1	1	113.874	49.4872	1.87099	2		-1	-1	0	0	-1	-1	-1	-1	-1	-1	-1
163.016	108.906	24.5	1	-1	1	122.869	52.5037	1.28031	2		-1	-1	0	0	-1	-1	-1	-1	-1	-1	-1
153.641	107.969	24.5	1	-1	1	113.788	52.7452	1.30441	2		-1	-1	0	0	-1	-1	-1	-1	-1	-1	-1
145.516	107.344	28.42	1	-1	1	105.554	49.5286	1.29017	2		-1	-1	0	0	-1	-1	-1	-1	-1	-1	-1
139.266	106.719	30.38	1	-1	1	99.2698	47.9665	1.2896	2		-1	-1	0	0	-1	-1	-1	-1	-1	-1	-1
131.766	106.719	30.38	1	-1	1	91.8836	48.5473	1.29456	2		-1	-1	0	0	-1	-1	-1	-1	-1	-1	-1
125.828	106.719	34.3	1	-1	1	85.694	45.5024	1.26112	2		-1	-1	0	0	-1	-1	-1	-1	-1	-1	-1
117.078	105.156	34.3	1	-1	1	76.9541	45.51	1.29441	2		-1	-1	0	0	-1	-1	-1	-1	-1	-1	-1
133.641	101.094	31.36	1	-1	1	93.6193	45.3725	1.39676	2		-1	-1	0	0	-1	-1	-1	-1	-1	-1	-1
125.203	100.156	31.36	1	-1	1	85.1917	45.757	1.41901	2		-1	-1	0	0	-1	-1	-1	-1	-1	-1	-1
114.266	99.5313	35.28	1	-1	1	73.8748	42.7246	1.40419	2		-1	-1	0	0	-1	-1	-1	-1	-1	-1	-1
104.578	99.5313	35.28	1	-1	1	64.0782	43.4704	1.39987	2		-1	-1	0	0	-1	-1	-1	-1	-1	-1	-1
93.0156	98.5938	36.26	1	-1	1	52.2323	43.0853	1.40247	2		-1	-1	0	0	-1	-1	-1	-1	-1	-1	-1
71.4531	96.0938	39.2	1	-1	1	30.2348	40.9428	1.40366	2		-1	-1	0	0	-1	-1	-1	-1	-1	-1	-1
64.8906	95.1563	39.2	1	-1	1	23.6223	41.0741	1.41465	2		-1	-1	0	0	-1	-1	-1	-1	-1	-1	-1
54.5781	92.9688	41.16	1	-1	1	13.0918	39.2111	1.43412	2		-1	-1	0	0	-1	-1	-1	-1	-1	-1	-1
42.0781	84.2188	44.1	1	-1	1	-0.205248	35.2595	1.62255	2		-1	-1	0	0	-1	-1	-1	-1	-1	-1	-1
132.391	95.1563	30.38	1	-1	1	92.413	44.8421	1.52993	2		-1	-1	0	0	-1	-1	-1	-1	-1	-1	-1
123.641	94.5313	30.38	1	-1	1	83.5889	45.4372	1.54399	2		-1	-1	0	0	-1	-1	-1	-1	-1	-1	-1
113.328	94.5313	33.32	1	-1	1	72.8822	43.3715	1.52798	2		-1	-1	0	0	-1	-1	-1	-1	-1	-1	-1
104.266	94.5313	33.32	1	-1	1	63.6223	44.0393	1.52178	2		-1	-1	0	0	-1	-1	-1	-1	-1	-1	-1
138.016	89.5313	28.42	1	-1	1	98.1905	45.5384	1.65827	2		-1	-1	0	0	-1	-1	-1	-1	-1	-1	-1
127.391	84.8438	30.38	1	-1	1	87.2359	44.361	1.76034	2		-1	-1	0	0	-1	-1	-1	-1	-1	-1	-1
118.641	84.8438	30.38	1	-1	1	78.2334	45.035	1.75587	2		-1	-1	0	0	-1	-1	-1	-1	-1	-1	-1
110.516	85.4688	31.36	1	-1	1	69.7606	44.6222	1.73569	2		-1	-1	0	0	-1	-1	-1	-1	-1	-1	-1
102.078	84.2188	31.36	1	-1	1	60.9096	45.1675	1.75408	2		-1	-1	0	0	-1	-1	-1	-1	-1	-1	-1
153.953	113.281	30.38	1	-1	1	113.557	50.1199	1.15883	2		-1	-1	0	0	-1	-1	-1	-1	-1	-1	-1
147.703	114.531	30.38	1	-1	1	107.475	51.2127	1.14473	2		-1	-1	0	0	-1	-1	-1	-1	-1	-1	-1
68.3281	99.5313	47.04	1	-1	1	27.0916	35.3667	1.2333	2		-1	-1	1	0	-1	-1	-1	-1	-1	-1	-1
55.5156	100.469	43.12	1	-1	1	14.5726	40.2196	1.24277	2		-1	-1	0	0	-1	-1	-1	-1	-1	-1	-1
43.9531	53.5938	58.8	1	-1	1	-1.49729	33.5614	2.65653	2		-1	-1	0	0	-1	-1	-1	-1	-1	-1	-1
109.266	78.5938	61.74	5	-1	1	66.0919	15.9525	2.17852	2		-1	-1	1	0	-1	-1	-1	-1	-1	-1	-1
89.0625	96.4063	65.895	5	-1	1	46.6789	16.6501	0.912338	2		-1	-1	1	0	-1	-1	-1	-1	-1	-1	-1
93.75	84.2188	59.645	4	-1	1	50.7611	17.3686	1.7521	2		-1	-1	1	0	-1	-1	-1	-1	-1	-1	-1
93.75	92.0313	69.3325	6	-1	1	50.8411	10.7333	0.961096	2		-1	-1	1	0	-1	-1	-1	-1	-1	-1	-1
157.078	60.1563	60.76	3	-1	1	114.73	28.4134	2.88161	2		-1	-1	1	0	-1	-1	-1	-1	-1	-1	-1
266.453	52.9688	57.82	3	-1	1	221.706	35.4282	3.02859	2		-1	-1	1	0	-1	-1	-1	-1	-1	-1	-1
267.391	41.7188	51.94	2	-1	1	222.218	47.9545	2.97544	2		-1	-1	1	0	-1	-1	-1	-1	-1	-1	-1
154.891	78.9063	60.76	6	-1	1	112.337	13.8035	2.28133	2		-1	-1	1	0	-1	-1	-1	-1	-1	-1	-1
186.766	77.3438	59.78	6	-1	1	143.971	13.3337	2.41345	2		-1	-1	1	0	-1	-1	-1	-1	-1	-1	-1
200.828	75.1563	59.78	6	-1	1	157.826	14.2111	2.56648	2		-1	-1	1	0	-1	-1	-1	-1	-1	-1	-1
232.703	79.2188	59.78	6	-1	1	189.315	10.731	2.41952	2		-1	-1	1	0	-1	-1	-1	-1	-1	-1	-1
268.641	87.6563	59.78	6	-1	1	225.262	7.75256	1.66968	2		-1	-1	1	0	-1	-1	-1	-1	-1	-1	-1
306.453	91.0938	59.78	6	-1	1	263.103	8.06668	1.48327	2		-1	-1	1	0	-1	-1	-1	-1	-1	-1	-1
181.141	85.7813	54.88	5	-1	1	138.667	15.609	1.73312	2		-1	-1	1	0	-1	-1	-1	-1	-1	-1	-1
123.016	90.7813	54.88	4	-1	1	80.9576	20.8181	1.49989	2		-1	-1	1	0	-1	-1	-1	-1	-1	-1	-1
188.641	89.8438	57.4575	6	-1	1	145.869	13.2067	1.41574	2		-1	-1	1	0	-1	-1	-1	-1	-1	-1	-1
204.578	89.8438	54.88	6	-1	1	161.781	14.8419	1.44884	2		-1	-1	1	0	-1	-1	-1	-1	-1	-1	-1
210.938	77.9688	57.4575	6	-1	1	167.893	13.7713	2.3304	2		-1	-1	1	0	-1	-1	-1	-1	-1	-1	-1
210.938	76.7188	81.2075	6	-1	1	166.857	15.2717	-2.0393	2		-1	-1	1	0	-1	-1	-1	-1	-1	-1	-1
210.938	69.5313	77.77	5	-1	1	166.967	18.4715	-2.47772	2		-1	-1	1	0	-1	-1	-1	-1	-1	-1	-1
238.641	97.3438	59.78	5	-1	1	195.639	13.8502	0.791091	2		-1	-1	1	0	-1	-1	-1	-1	-1	-1	-1
251.766	97.6563	59.78	5	-1	1	208.791	13.651	0.779692	2		-1	-1	1	0	-1	-1	-1	-1	-1	-1	-1
264.891	97.9688	59.78	5	-1	1	221.944	13.427	0.778324	2		-1	-1	1	0	-1	-1	-1	-1	-1	-1	-1
243.016	108.906	56.84	4	-1	1	200.402	25.1668	0.613939	2		-1	-1	1	0	-1	-1	-1	-1	-1	-1	-1
278.641	108.281	56.84	4	-1	1	236.202	23.2324	0.638423	2		-1	-1	1	0	-1	-1	-1	-1	-1	-1	-1
308.016	114.219	56.84	4	-1	1	266.029	27.2121	0.571219	2		-1	-1	1	0	-1	-1	-1	-1	-1	-1	-1
315.516	88.2813	56.84	6	-1	1	271.919	10.9379	1.86007	2		-1	-1	1	0	-1	-1	-1	-1	-1	-1	-1
331.453	87.9688	56.84	6	-1	1	287.737	11.4146	1.97653	2		-1	-1	1	0	-1	-1	-1	-1	-1	-1	-1
323.328	96.4063	55.86	6	-1	1	280.202	13.4747	1.25118	2		-1	-1	1	0	-1	-1	-1	-1	-1	-1	-1
323.016	91.7188	55.86	6	-1	1	279.584	12.0394	1.60162	2		-1	-1	1	0	-1	-1	-1	-1	-1	-1	-1
293.328	100.781	53.9	5	-1	1	250.52	18.4181	0.993232	2		-1	-1	1	0	-1	-1	-1	-1	-1	-1	-1
87.0781	123.281	61.74	1	-1	1	46.9515	42.1118	0.542642	2		-1	-1	0	0	-1	-1	-1	-1	-1	-1	-1
75.5156	118.594	60.76	1	-1	1	35.2832	39.2861	0.612548	2		-1	-1	0	0	-1	-1	-1	-1	-1	-1	-1
231.453	131.094	59.78	2	-1	1	189.145	45.8614	0.344209	2		-1	-1	1	0	-1	-1	-1	-1	-1	-1	-1
64.2188	81.0938	79.9575	6	-1	1	20.1185	1.93997	-1.92444	2		-1	-1	0	0	-1	-1	-1	-1	-1	-1	-1
64.2656	87.9688	61.74	3	-1	1	21.4816	17.5112	1.3939	2		-1	-1	0	0	-1	-1	-1	-1	-1	-1	-1
37.0781	81.0938	86.24	1	-1	1	-7.16028	6.98365	-1.2168	2		-1	-1	0	0	-1	-1	-1	-1	-1	-1	-1
67.7031	106.719	88.2	1	-1	1	25.3947	26.3155	-0.228134	2		-1	-1	0	0	-1	-1	-1	-1	-1	-1	-1
62.3906	104.531	88.2	1	-1	1	19.9223	24.6329	-0.246983	2		-1	-1	0	0	-1	-1	-1	-1	-1	-1	-1
78.9531	113.594	88.2	1	-1	1	37.1708	32.0057	-0.170641	2		-1	-1	0	0	-1	-1	-1	-1	-1	-1	-1
61.7656	110.781	89.18	1	-1	1	19.7827	30.8173	-0.193717	2		-1	-1	0	0	-1	-1	-1	-1	-1	-1	-1
63.0156	113.594	84.28	1	-1	1	21.4619	32.1013	-0.0220499	2		-1	-1	0	0	-1	-1	-1	-1	-1	-1	-1
61.4531	118.594	85.26	1	-1	1	20.2843	37.2987	-0.0207095	2		-1	-1	0	0	-1	-1	-1	-1	-1	-1	-1
52.0781	111.094	92.12	1	-1	1	10.0436	32.8273	-0.254299	2		-1	-1	1	0	-1	-1	-1	-1	-1	-1	-1
60.5156	116.719	75.46	1	-1	1	19.593	34.9619	0.249325	2		-1	-1	1	0	-1	-1	-1	-1	-1	-1	-1
50.5156	113.906	74.48	1	-1	1	9.44112	33.152	0.296046	2		-1	-1	0	0	-1	-1	-1	-1	-1	-1	-1
45.5156	110.469	83.3	1	-1	1	3.81634	30.1908	0.0229574	2		-1	-1	0	0	-1	-1	-1	-1	-1	-1	-1
38.3281	107.344	83.3	1	-1	1	-3.6013	27.6609	0.0206339	2		-1	-1	0	0	-1	-1	-1	-1	-1	-1	-1
72.3906	110.156	94.08	1	-1	1	30.1099	31.769	-0.368535	2		-1	-1	0	0	-1	-1	-1	-1	-1	-1	-1
64.5781	107.656	94.08	1	-1	1	22.1223	30.0303	-0.390517	2		-1	-1	0	0	-1	-1	-1	-1	-1	-1	-1
58.6406	106.406	94.08	1	-1	1	16.106	29.2659	-0.396973	2		-1	-1	0	0	-1	-1	-1	-1	-1	-1	-1
67.3906	115.469	95.06	1	-1	1	25.5359	37.1531	-0.308236	2		-1	-1	0	0	-1	-1	-1	-1	-1	-1	-1
61.1406	113.594	95.06	1	-1	1	19.1562	35.8401	-0.319008	2		-1	-1	0	0	-1	-1	-1	-1	-1	-1	-1
57.3906	98.2813	104.86	1	-1	1	13.7432	31.2128	-0.838572	2		-1	-1	0	0	-1	-1	-1	-1	-1	-1	-1
46.1406	98.5938	104.86	1	-1	1	2.56812	31.5271	-0.797176	2		-1	-1	0	0	-1	-1	-1	-1	-1	-1	-1
58.6406	94.5313	100.94	1	-1	1	14.8339	25.9051	-0.883585	2		-1	-1	1	0	-1	-1	-1	-1	-1	-1	-1
64.2188	89.5313	103.707	2	-1	1	19.8571	26.5096	-1.12037	2		-1	-1	0	0	-1	-1	-1	-1	-1	-1	-1
64.2188	83.5938	103.395	2	-1	1	19.3734	25.1568	-1.34448	2		-1	-1	0	0	-1	-1	-1	-1	-1	-1	-1
64.2188	72.9688	110.582	1	-1	1	18.1925	33.504	-1.67895	2		-1	-1	0	0	-1	-1	-1	-1	-1	-1	-1
64.2188	97.3438	112.145	1	-1	1	20.1668	37.1638	-0.982545	2		-1	-1	0	0	-1	-1	-1	-1	-1	-1	-1
67.7031	80.7813	111.72	1	-1	1	22.2687	33.5968	-1.45191	2		-1	-1	0	0	-1	-1	-1	-1	-1	-1	-1
59.5781	80.4688	110.74	1	-1	1	14.1926	32.2727	-1.4424	2		-1	-1	0	0	-1	-1	-1	-1	-1	-1	-1
59.5781	89.2188	110.74	1	-1	1	14.9242	33.1449	-1.17618	2		-1	-1	0	0	-1	-1	-1	-1	-1	-1	-1
69.5781	74.8438	108.78	1	-1	1	23.7588	31.6155	-1.64923	2		-1	-1	1	0	-1	-1	-1	-1	-1	-1	-1
82.3906	72.3438	109.76	1	-1	1	36.2669	34.064	-1.74018	2		-1	-1	0	0	-1	-1	-1	-1	-1	-1	-1
74.2656	72.3438	109.76	1	-1	1	28.1771	33.5334	-1.72429	2		-1	-1	0	0	-1	-1	-1	-1	-1	-1	-1
67.7031	69.5313	109.76	1	-1	1	21.4078	34.0516	-1.78961	2		-1	-1	0	0	-1	-1	-1	-1	-1	-1	-1
61.4531	67.3438	109.76	1	-1	1	15.002	34.4701	-1.83694	2		-1	-1	0	0	-1	-1	-1	-1	-1	-1	-1
58.3281	72.9688	109.76	1	-1	1	12.3609	32.35	-1.67316	2		-1	-1	0	0	-1	-1	-1	-1	-1	-1	-1
56.4531	67.9688	96.04	1	-1	1	10.6345	21.9519	-2.06058	2		-1	-1	0	0	-1	-1	-1	-1	-1	-1	-1
45.2031	68.2813	96.04	1	-1	1	-0.540659	20.8392	-2.02636	2		-1	-1	0	0	-1	-1	-1	-1	-1	-1	-1
51.4531	74.8438	96.04	1	-1	1	6.23094	18.2705	-1.7468	2		-1	-1	0	0	-1	-1	-1	-1	-1	-1	-1
59.5781	73.9063	103.88	1	-1	1	13.9232	26.5273	-1.70109	2		-1	-1	1	0	-1	-1	-1	-1	-1	-1	-1
60.5156	76.4063	96.04	1	-1	1	15.3848	18.3752	-1.6991	2		-1	-1	0	0	-1	-1	-1	-1	-1	-1	-1
61.1406	84.8438	98.0825	1	-1	1	16.6294	19.9137	-1.25239	2		-1	-1	0	0	-1	-1	-1	-1	-1	-1	-1
56.7656	82.9688	98	1	-1	1	12.12	19.4755	-1.32667	2		-1	-1	0	0	-1	-1	-1	-1	-1	-1	-1
67.7031	78.2813	98	2	-1	1	22.6181	20.2537	-1.60691	2		-1	-1	1	0	-1	-1	-1	-1	-1	-1	-1
84.5781	79.5313	99.9575	3	-1	1	39.4448	22.8811	-1.59089	2		-1	-1	1	0	-1	-1	-1	-1	-1	-1	-1
66.7656	87.3438	99.96	2	-1	1	22.3626	22.3721	-1.17734	2		-1	-1	1	0	-1	-1	-1	-1	-1	-1	-1
88.3281	70.4688	99.96	2	-1	1	42.4191	26.3702	-1.94514	2		-1	-1	1	0	-1	-1	-1	-1	-1	-1	-1
63.3281	60.4688	88.2	1	-1	1	17.1718	23.5805	-2.54482	2		-1	-1	0	0	-1	-1	-1	-1	-1	-1	-1
77.7031	56.0938	88.2	1	-1	1	31.1187	28.9309	-2.6069	2		-1	-1	0	0	-1	-1	-1	-1	-1	-1	-1
86.1406	55.4688	89.18	1	-1	1	39.4275	30.6539	-2.58232	2		-1	-1	0	0	-1	-1	-1	-1	-1	-1	-1
81.4531	49.8438	88.2	1	-1	1	34.3299	35.1545	-2.67013	2		-1	-1	0	0	-1	-1	-1	-1	-1	-1	-1
74.2656	50.4688	88.2	1	-1	1	27.2258	33.8998	-2.66748	2		-1	-1	0	0	-1	-1	-1	-1	-1	-1	-1
64.5781	50.7813	88.2	1	-1	1	17.6064	32.7119	-2.66856	2		-1	-1	0	0	-1	-1	-1	-1	-1	-1	-1
47.0781	49.5313	82.32	1	-1	1	0.317068	31.1501	-2.86932	2		-1	-1	0	0	-1	-1	-1	-1	-1	-1	-1
91.4531	45.7813	80.36	1	-1	1	44.3877	38.5498	-2.89392	2		-1	-1	0	0	-1	-1	-1	-1	-1	-1	-1
84.2656	44.2188	80.36	1	-1	1	36.979	39.4841	-2.90325	2		-1	-1	0	0	-1	-1	-1	-1	-1	-1	-1
75.8281	43.5938	84.28	1	-1	1	28.3663	39.8124	-2.81354	2		-1	-1	0	0	-1	-1	-1	-1	-1	-1	-1
71.4531	45.4688	84.28	1	-1	1	24.167	37.5796	-2.80856	2		-1	-1	0	0	-1	-1	-1	-1	-1	-1	-1
79.8906	55.1563	77.42	1	-1	1	33.6572	28.123	-2.98434	2		-1	-1	0	0	-1	-1	-1	-1	-1	-1	-1
73.9531	56.7188	77.42	1	-1	1	27.876	26.0731	-2.99422	2		-1	-1	0	0	-1	-1	-1	-1	-1	-1	-1
53.9531	82.9688	75.46	1	-1	1	10.2372	3.67151	1.23567	2		-1	-1	0	0	-1	-1	-1	-1	-1	-1	-1
47.0781	97.9688	83.3	1	-1	1	4.32696	17.8343	-0.0805021	2		-1	-1	0	0	-1	-1	-1	-1	-1	-1	-1
54.8906	99.5313	89.18	1	-1	1	11.9969	21.0446	-0.359429	2		-1	-1	0	0	-1	-1	-1	-1	-1	-1	-1
50.2031	96.0938	89.18	1	-1	1	7.04229	18.3711	-0.433192	2		-1	-1	0	0	-1	-1	-1	-1	-1	-1	-1
54.2656	102.031	93.1	1	-1	1	11.424	25.291	-0.442417	2		-1	-1	0	0	-1	-1	-1	-1	-1	-1	-1
47.7031	104.219	92.12	1	-1	1	5.11276	26.9428	-0.346389	2		-1	-1	0	0	-1	-1	-1	-1	-1	-1	-1
46.1406	93.2813	98.98	1	-1	1	2.36331	23.6873	-0.838882	2		-1	-1	0	0	-1	-1	-1	-1	-1	-1	-1
36.1406	87.0313	97.02	1	-1	1	-8.03612	19.0673	-1.01179	2		-1	-1	0	0	-1	-1	-1	-1	-1	-1	-1
43.9531	76.7188	101.92	1	-1	1	-1.31916	23.078	-1.56307	2		-1	-1	0	0	-1	-1	-1	-1	-1	-1	-1
38.0156	84.8438	101.92	1	-1	1	-6.55161	23.1176	-1.18861	2		-1	-1	0	0	-1	-1	-1	-1	-1	-1	-1
45.2031	83.5938	99.96	1	-1	1	0.580021	21.1382	-1.2571	2		-1	-1	0	0	-1	-1	-1	-1	-1	-1	-1
47.0781	79.8438	105.84	1	-1	1	1.894	26.8565	-1.43413	2		-1	-1	0	0	-1	-1	-1	-1	-1	-1	-1
50.5156	73.9063	106.82	1	-1	1	4.78029	28.802	-1.64991	2		-1	-1	0	0	-1	-1	-1	-1	-1	-1	-1
55.8281	68.2813	103.88	1	-1	1	9.71915	28.3711	-1.88194	2		-1	-1	0	0	-1	-1	-1	-1	-1	-1	-1
47.0781	68.5938	103.88	1	-1	1	1.0332	27.5881	-1.85428	2		-1	-1	0	0	-1	-1	-1	-1	-1	-1	-1
31.1406	72.0313	105.84	1	-1	1	-14.6276	27.1515	-1.67453	2		-1	-1	0	0	-1	-1	-1	-1	-1	-1	-1
67.3906	59.2188	93.1	1	-1	1	20.9127	27.4108	-2.40098	2		-1	-1	0	0	-1	-1	-1	-1	-1	-1	-1
59.2656	60.4688	100.94	1	-1	1	12.6082	30.7578	-2.16022	2		-1	-1	0	0	-1	-1	-1	-1	-1	-1	-1
51.7656	61.4063	100.94	1	-1	1	5.21913	29.482	-2.12876	2		-1	-1	0	0	-1	-1	-1	-1	-1	-1	-1
27.0781	68.2813	98	1	-1	1	-18.6669	21.0399	-1.93397	2		-1	-1	0	0	-1	-1	-1	-1	-1	-1	-1
13.9531	69.2188	97.02	1	-1	1	-31.6168	18.738	-1.88108	2		-1	-1	0	0	-1	-1	-1	-1	-1	-1	-1
60.8281	64.2188	98.98	1	-1	1	14.5573	26.9474	-2.11088	2		-1	-1	0	0	-1	-1	-1	-1	-1	-1	-1
70.5156	63.2813	98.98	1	-1	1	24.1244	28.397	-2.14862	2		-1	-1	0	0	-1	-1	-1	-1	-1	-1	-1
77.0781	62.0313	98.98	1	-1	1	30.554	29.8276	-2.18684	2		-1	-1	0	0	-1	-1	-1	-1	-1	-1	-1
74.5781	66.0938	102.9	1	-1	1	28.2449	30.0884	-1.99607	2		-1	-1	0	0	-1	-1	-1	-1	-1	-1	-1
86.7656	57.6563	96.04	1	-1	1	39.9534	32.1283	-2.35751	2		-1	-1	0	0	-1	-1	-1	-1	-1	-1	-1
77.7031	58.2813	96.04	1	-1	1	30.9824	30.7944	-2.34129	2		-1	-1	0	0	-1	-1	-1	-1	-1	-1	-1
65.5156	55.1563	99.96	1	-1	1	18.4269	34.5346	-2.29763	2		-1	-1	0	0	-1	-1	-1	-1	-1	-1	-1
70.5156	54.5313	99.96	1	-1	1	23.353	35.4753	-2.31157	2		-1	-1	0	0	-1	-1	-1	-1	-1	-1	-1
76.4531	54.5313	99.96	1	-1	1	29.2647	36.0153	-2.31478	2		-1	-1	0	0	-1	-1	-1	-1	-1	-1	-1
82.7031	53.2813	99.96	1	-1	1	35.3831	37.576	-2.33833	2		-1	-1	0	0	-1	-1	-1	-1	-1	-1	-1
89.2656	51.7188	99.96	1	-1	1	41.7866	39.4389	-2.36468	2		-1	-1	0	0	-1	-1	-1	-1	-1	-1	-1
95.2031	52.9688	99.96	1	-1	1	47.9329	38.9608	-2.34806	2		-1	-1	0	0	-1	-1	-1	-1	-1	-1	-1
99.8906	52.3438	99.96	1	-1	1	52.672	39.8732	-2.35777	2		-1	-1	0	0	-1	-1	-1	-1	-1	-1	-1
107.391	51.7188	99.96	1	-1	1	60.3185	41.0028	-2.36537	2		-1	-1	0	0	-1	-1	-1	-1	-1	-1	-1
113.641	51.4063	99.96	1	-1	1	66.7325	41.7436	-2.36677	2		-1	-1	0	0	-1	-1	-1	-1	-1	-1	-1
122.078	49.5313	99.96	1	-1	1	75.3752	43.8883	-2.38511	2		-1	-1	0	0	-1	-1	-1	-1	-1	-1	-1
128.641	49.5313	99.96	1	-1	1	82.1772	44.3131	-2.37827	2		-1	-1	0	0	-1	-1	-1	-1	-1	-1	-1
135.516	49.8438	99.96	1	-1	1	89.305	44.4641	-2.36563	2		-1	-1	0	0	-1	-1	-1	-1	-1	-1	-1
136.453	53.9063	103.88	1	-1	1	89.9882	43.8107	-2.23756	2		-1	-1	0	0	-1	-1	-1	-1	-1	-1	-1
128.016	54.2188	103.88	1	-1	1	81.3304	43.0225	-2.24188	2		-1	-1	0	0	-1	-1	-1	-1	-1	-1	-1
119.891	55.4688	103.88	1	-1	1	73.0477	41.521	-2.22828	2		-1	-1	0	0	-1	-1	-1	-1	-1	-1	-1
111.766	56.4063	103.88	1	-1	1	64.8034	40.2151	-2.21616	2		-1	-1	0	0	-1	-1	-1	-1	-1	-1	-1
79.8906	57.3438	104.86	1	-1	1	32.723	37.5298	-2.16733	2		-1	-1	0	0	-1	-1	-1	-1	-1	-1	-1
67.7031	60.7813	104.86	1	-1	1	20.8757	34.2296	-2.08334	2		-1	-1	1	0	-1	-1	-1	-1	-1	-1	-1
101.766	47.9688	87.22	1	-1	1	54.9959	38.4417	-2.69981	2		-1	-1	0	0	-1	-1	-1	-1	-1	-1	-1
112.391	47.6563	87.22	1	-1	1	66.1032	39.4904	-2.6915	2		-1	-1	0	0	-1	-1	-1	-1	-1	-1	-1
123.641	47.6563	87.22	1	-1	1	77.9217	40.1273	-2.67626	2		-1	-1	0	0	-1	-1	-1	-1	-1	-1	-1
111.766	48.5938	93.1	1	-1	1	65.1052	40.6307	-2.54662	2		-1	-1	0	0	-1	-1	-1	-1	-1	-1	-1
100.203	49.5313	93.1	1	-1	1	53.1588	38.8886	-2.54421	2		-1	-1	0	0	-1	-1	-1	-1	-1	-1	-1
90.8281	50.1563	92.12	1	-1	1	43.5842	37.1019	-2.56343	2		-1	-1	0	0	-1	-1	-1	-1	-1	-1	-1
81.4531	51.7188	92.12	1	-1	1	34.3271	34.8116	-2.54645	2		-1	-1	0	0	-1	-1	-1	-1	-1	-1	-1
99.2656	49.8438	74.48	1	-1	1	53.208	35.0361	-3.04327	2		-1	-1	0	0	-1	-1	-1	-1	-1	-1	-1
110.203	48.2813	74.48	1	-1	1	64.6811	37.202	-3.02329	2		-1	-1	0	0	-1	-1	-1	-1	-1	-1	-1
83.0156	50.7813	76.44	1	-1	1	36.4427	32.7635	-3.00928	2		-1	-1	0	0	-1	-1	-1	-1	-1	-1	-1
199.266	35.1563	84.28	1	-1	1	155.068	52.6688	-2.69563	2		-1	-1	0	0	-1	-1	-1	-1	-1	-1	-1
226.453	34.5313	89.18	1	-1	1	181.494	55.4323	-2.59423	2		-1	-1	0	0	-1	-1	-1	-1	-1	-1	-1
200.516	38.9063	98	1	-1	1	155.567	54.8376	-2.43218	2		-1	-1	0	0	-1	-1	-1	-1	-1	-1	-1
142.391	38.5938	60.76	1	-1	1	99.8621	49.306	3.03866	2		-1	-1	0	0	-1	-1	-1	-1	-1	-1	-1
42.0781	98.5938	67.62	1	-1	1	0.0391779	21.6274	0.726931	2		-1	-1	0	0	-1	-1	-1	-1	-1	-1	-1
63.9531	80.7813	51.94	1	-1	1	20.9684	26.3521	1.78389	2		-1	-1	0	0	-1	-1	-1	-1	-1	-1	-1
59.5781	81.4063	53.9	1	-1	1	16.5848	24.5407	1.74707	2		-1	-1	0	0	-1	-1	-1	-1	-1	-1	-1
56.1406	80.7813	59.78	1	-1	1	12.8706	18.8153	1.76817	2		-1	-1	0	0	-1	-1	-1	-1	-1	-1	-1
72.7031	74.8438	56.2075	2	-1	1	29.0103	23.116	2.08553	2		-1	-1	0	0	-1	-1	-1	-1	-1	-1	-1
71.4531	79.5313	55.27	2	-1	1	28.1958	22.9093	1.87327	2		-1	-1	0	0	-1	-1	-1	-1	-1	-1	-1
65.8281	81.0938	57.82	1	-1	1	22.6221	20.3996	1.7902	2		-1	-1	0	0	-1	-1	-1	-1	-1	-1	-1
79.2188	120.156	84.02	1	-1	1	38.1541	37.2752	-0.00682659	2		-1	-1	0	0	-1	-1	-1	-1	-1	-1	-1
76.4063	120.469	78.7075	1	-1	1	35.5961	37.2688	0.139537	2		-1	-1	0	0	-1	-1	-1	-1	-1	-1	-1
76.4063	126.094	72.145	1	-1	1	36.3336	43.2071	0.295052	2		-1	-1	0	0	-1	-1	-1	-1	-1	-1	-1
75	82.6563	117.145	1	-1	1	29.4698	39.2844	-1.41313	2		-1	-1	0	0	-1	-1	-1	-1	-1	-1	-1
77.3438	85.7813	109.332	2	-1	1	32.3827	31.6904	-1.32281	2		-1	-1	0	0	-1	-1	-1	-1	-1	-1	-1
78.75	93.2813	114.957	1	-1	1	34.181	38.5945	-1.14389	2		-1	-1	0	0	-1	-1	-1	-1	-1	-1	-1
77.8125	103.281	109.957	1	-1	1	34.2872	37.9833	-0.849678	2		-1	-1	0	0	-1	-1	-1	-1	-1	-1	-1
72.1875	107.969	101.207	1	-1	1	29.4346	34.3057	-0.580901	2		-1	-1	0	0	-1	-1	-1	-1	-1	-1	-1
71.7188	112.969	103.395	1	-1	1	29.2969	39.514	-0.534855	2		-1	-1	0	0	-1	-1	-1	-1	-1	-1	-1
68.9063	111.094	66.2075	1	-1	1	27.8537	30.868	0.558574	2		-1	-1	0	0	-1	-1	-1	-1	-1	-1	-1
66.5625	52.6563	94.3325	1	-1	1	19.4893	33.5788	-2.47599	2		-1	-1	0	0	-1	-1	-1	-1	-1	-1	-1
67.0313	103.594	94.9575	1	-1	1	24.1894	27.1056	-0.504231	2		-1	-1	0	0	-1	-1	-1	-1	-1	-1	-1
67.9688	110.469	81.52	1	-1	1	26.2446	28.2123	0.0437744	2		-1	-1	0	0	-1	-1	-1	-1	-1	-1	-1
72.6563	107.344	75.5825	2	-1	1	30.8922	24.5921	0.259892	2		-1	-1	0	0	-1	-1	-1	-1	-1	-1	-1
78.75	86.0938	50.5825	2	-1	1	36.2006	27.2051	1.63311	2		-1	-1	0	0	-1	-1	-1	-1	-1	-1	-1
74.5313	63.2813	54.9575	1	-1	1	29.9147	30.1559	2.44398	2		-1	-1	0	0	-1	-1	-1	-1	-1	-1	-1
85.3125	102.344	110.27	1	-1	1	41.6636	37.718	-0.893555	2		-1	-1	0	0	-1	-1	-1	-1	-1	-1	-1
85.3125	97.9688	114.332	1	-1	1	41.1324	39.5382	-1.04059	2		-1	-1	0	0	-1	-1	-1	-1	-1	-1	-1
85.3125	92.0313	114.02	1	-1	1	40.6487	37.5117	-1.18554	2		-1	-1	0	0	-1	-1	-1	-1	-1	-1	-1
85.3125	87.3438	114.957	1	-1	1	40.2186	37.6946	-1.31226	2		-1	-1	0	0	-1	-1	-1	-1	-1	-1	-1
84.2656	81.7188	115.895	1	-1	1	38.6678	38.4598	-1.45777	2		-1	-1	0	0	-1	-1	-1	-1	-1	-1	-1
83.4375	76.4063	122.77	1	-1	1	37.1192	45.8008	-1.56404	2		-1	-1	0	0	-1	-1	-1	-1	-1	-1	-1
78.2813	118.906	73.0825	1	-1	1	37.5614	35.8217	0.293575	2		-1	-1	0	0	-1	-1	-1	-1	-1	-1	-1
82.9688	63.5937	107.77	1	-1	1	36.1919	36.1846	-1.98924	2		-1	-1	0	0	-1	-1	-1	-1	-1	-1	-1
65.5156	92.9688	47.04	1	-1	1	23.7426	32.9218	1.40354	2		-1	-1	0	0	-1	-1	-1	-1	-1	-1	-1
58.3281	92.3438	47.04	1	-1	1	16.534	33.1926	1.40704	2		-1	-1	0	0	-1	-1	-1	-1	-1	-1	-1
65.8281	88.9063	50.96	1	-1	1	23.5545	28.0077	1.49534	2		-1	-1	0	0	-1	-1	-1	-1	-1	-1	-1
59.8906	85.4688	48.02	1	-1	1	17.475	30.6194	1.61328	2		-1	-1	0	0	-1	-1	-1	-1	-1	-1	-1
154.688	136.719	72.145	1	-1	1	110.63	50.5797	0.168849	2		-1	-1	0	0	-1	-1	-1	-1	-1	-1	-1
210.516	103.594	31.36	2	-1	1	168.744	41.5189	1.28728	1.90625		-1	-1	1	0	-1	-1	-1	-1	-1	-1	-1
214.891	90.7813	34.3	3	-1	1	172.804	34.7251	1.58757	1.90625		-1	-1	1	0	-1	-1	-1	-1	-1	-1	-1
169.891	58.9063	35.28	1	-1	1	129.379	44.9751	2.37504	1.90625		-1	-1	1	0	-1	-1	-1	-1	-1	-1	-1
202.078	73.5938	41.8325	3	-1	1	159.933	29.9536	2.14813	1.90625		-1	-1	1	0	-1	-1	-1	-1	-1	-1	-1
221.141	70.1563	40.18	3	-1	1	178.434	32.3066	2.23978	1.90625		-1	-1	1	0	-1	-1	-1	-1	-1	-1	-1
224.578	110.156	44.1	2	-1	1	182.27	34.2945	0.945175	1.90625		-1	-1	1	0	-1	-1	-1	-1	-1	-1	-1
176.141	107.344	44.1	2	-1	1	134.243	34.2856	1.05422	1.90625		-1	-1	1	0	-1	-1	-1	-1	-1	-1	-1
146.25	80.7813	46.2075	3	-1	1	104.933	27.5306	1.92883	1.90625		-1	-1	1	0	-1	-1	-1	-1	-1	-1	-1
205.203	98.5938	45.08	4	-1	1	162.885	27.2542	1.23909	1.90625		-1	-1	1	0	-1	-1	-1	-1	-1	-1	-1
218.016	99.2188	45.08	4	-1	1	175.561	27.0409	1.21228	1.90625		-1	-1	1	0	-1	-1	-1	-1	-1	-1	-1
296.766	97.9688	45.08	4	-1	1	253.743	24.3393	1.33561	1.90625		-1	-1	1	0	-1	-1	-1	-1	-1	-1	-1
333.953	99.5313	45.08	4	-1	1	290.821	24.4727	1.37174	1.90625		-1	-1	1	0	-1	-1	-1	-1	-1	-1	-1
285.828	81.7188	45.08	4	-1	1	242.053	23.2497	2.0068	1.90625		-1	-1	1	0	-1	-1	-1	-1	-1	-1	-1
269.266	89.5313	48.7075	5	-1	1	226.027	18.9504	1.60979	1.90625		-1	-1	1	0	-1	-1	-1	-1	-1	-1	-1
258.953	80.4688	44.1	4	-1	1	215.525	24.3301	1.99711	1.90625		-1	-1	1	0	-1	-1	-1	-1	-1	-1	-1
252.391	80.4688	44.1	4	-1	1	209.074	24.3526	1.98697	1.90625		-1	-1	1	0	-1	-1	-1	-1	-1	-1	-1
252.188	91.7188	47.4575	4	-1	1	209.194	20.8771	1.48282	1.90625		-1	-1	1	0	-1	-1	-1	-1	-1	-1	-1
235.313	82.3438	44.02	4	-1	1	192.356	24.2831	1.88817	1.90625		-1	-1	1	0	-1	-1	-1	-1	-1	-1	-1
145.203	91.0938	49	4	-1	1	103.602	24.7905	1.5325	1.90625		-1	-1	1	0	-1	-1	-1	-1	-1	-1	-1
214.266	85.4688	49	5	-1	1	171.571	19.698	1.747	1.90625		-1	-1	1	0	-1	-1	-1	-1	-1	-1	-1
223.328	84.2188	49	5	-1	1	180.472	19.4325	1.81744	1.90625		-1	-1	1	0	-1	-1	-1	-1	-1	-1	-1
208.125	76.7188	51.2075	5	-1	1	165.396	19.8966	2.20128	1.90625		-1	-1	1	0	-1	-1	-1	-1	-1	-1	-1
220.516	76.0938	52.4575	5	-1	1	177.481	18.7238	2.27902	1.90625		-1	-1	1	0	-1	-1	-1	-1	-1	-1	-1
149.891	81.4063	50.96	4	-1	1	108.158	22.4606	1.94466	1.90625		-1	-1	1	0	-1	-1	-1	-1	-1	-1	-1
224.891	67.6563	50.96	4	-1	1	181.69	25.1593	2.54307	1.90625		-1	-1	1	0	-1	-1	-1	-1	-1	-1	-1
239.578	75.4688	50.96	5	-1	1	196.22	20.0523	2.2976	1.90625		-1	-1	1	0	-1	-1	-1	-1	-1	-1	-1
244.266	75.7813	50.96	5	-1	1	200.833	19.87	2.29247	1.90625		-1	-1	1	0	-1	-1	-1	-1	-1	-1	-1
290.828	77.6563	50.96	5	-1	1	246.796	19.6079	2.30461	1.90625		-1	-1	1	0	-1	-1	-1	-1	-1	-1	-1
299.266	78.2813	50.96	5	-1	1	255.164	19.5556	2.29649	1.90625		-1	-1	1	0	-1	-1	-1	-1	-1	-1	-1
347.391	68.2813	53.0825	4	-1	1	302.218	27.8949	2.73816	1.90625		-1	-1	1	0	-1	-1	-1	-1	-1	-1	-1
351.141	90.1563	50.96	5	-1	1	307.423	17.4038	1.84353	1.90625		-1	-1	1	0	-1	-1	-1	-1	-1	-1	-1
355.516	67.6563	54.88	4	-1	1	310.311	28.0641	2.81077	1.90625		-1	-1	1	0	-1	-1	-1	-1	-1	-1	-1
348.016	116.406	63.7	4	-1	1	306.323	24.9239	0.348723	1.90625		-1	-1	1	0	-1	-1	-1	-1	-1	-1	-1
347.344	110.469	65.27	5	-1	1	305.273	18.8619	0.322853	1.90625		-1	-1	1	0	-1	-1	-1	-1	-1	-1	-1
359.266	109.844	63.7	5	-1	1	317.095	17.8255	0.43318	1.90625		-1	-1	1	0	-1	-1	-1	-1	-1	-1	-1
[truncated: 122 more rows]

## Sheet: 48h
x (micron)	y (micron)	z (micron)	label	predicted label	manual	distance from QC (z) (micron)	radial distance (r) (micron)	phi (radians)	radius (micron)	coefficients	subtype	predicted subtype	mitotic	predicted mitotic	cellfile	predicted cellfile	value	confidence	sphase	distance from border (micron)	volume (cube microns)
296	75	22	2	3	1	166.383	36.9765	1.71144	2		-1	-1	0	0	-1	-1	7.91785	-1	-1	-1	-1
205	113	65	2	2	0	74.5244	35.8176	-0.0712725	2		-1	-1	0	0	-1	-1	7.84489	-1	-1	-1	-1
333	107	61	3	3	0	203.072	28.5529	-0.0353532	2		-1	-1	0	0	-1	-1	7.83466	-1	-1	-1	-1
305	86	24	2	2	0	175.41	35.5556	1.40677	2		-1	-1	0	0	-1	-1	7.74628	-1	-1	-1	-1
306	104	31	2	2	0	176.532	37.8164	0.877481	2		-1	-1	0	0	-1	-1	7.71979	-1	-1	-1	-1
150	116	62	1	1	0	19.0686	37.8482	0.00322295	2		-1	-1	0	0	-1	-1	7.70755	-1	-1	-1	-1
399	67	32	3	3	0	268.355	29.24	2.05373	2		-1	-1	0	0	-1	-1	7.70588	-1	-1	-1	-1
360	38	58	2	2	0	229.412	40.8387	-3.09238	2		-1	-1	0	0	-1	-1	7.68381	-1	-1	-1	-1
313	37	69	2	2	0	182.072	42.6061	-2.83811	2		-1	-1	0	0	-1	-1	7.64795	-1	-1	-1	-1
204	57	39	2	2	0	73.9347	29.6336	2.39096	2		-1	-1	0	0	-1	-1	7.64459	-1	-1	-1	-1
481	109	30	2	2	0	349.752	42.7197	0.851979	2		-1	-1	0	0	-1	-1	7.6025	-1	-1	-1	-1
220	64	30	2	2	0	90.0763	33.1419	2.04503	2		-1	-1	0	0	-1	-1	7.59183	-1	-1	-1	-1
188	78	27	1	2	1	57.6041	33.4171	1.61616	2		-1	-1	0	0	-1	-1	7.53539	-1	-1	-1	-1
357	117	50	2	2	0	227.092	39.0789	0.270995	2		-1	-1	0	0	-1	-1	7.49657	-1	-1	-1	-1
312	104	44	3	3	0	182.298	29.5454	0.572928	2		-1	-1	0	0	-1	-1	7.46535	-1	-1	-1	-1
305	117	66	2	2	0	175.166	39.468	-0.129416	2		-1	-1	0	0	-1	-1	7.45613	-1	-1	-1	-1
355	73	19	2	2	0	224.691	39.7298	1.77404	2		-1	-1	0	0	-1	-1	7.45549	-1	-1	-1	-1
348	43	38	2	2	0	217.446	41.0956	2.68158	2		-1	-1	0	0	-1	-1	7.44345	-1	-1	-1	-1
297	85	41	4	5	1	167.171	19.1173	1.2584	2		-1	-1	0	0	-1	-1	7.36337	-1	-1	-1	-1
193	46	67	2	2	0	63.032	32.2398	-2.87917	2		-1	-1	0	0	-1	-1	7.31681	-1	-1	-1	-1
457	86	20	2	2	0	325.718	40.3925	1.45733	2		-1	-1	0	0	-1	-1	7.31434	-1	-1	-1	-1
261	111	48	2	2	0	131.348	35.3004	0.390603	2		-1	-1	0	0	-1	-1	7.31193	-1	-1	-1	-1
297	117	66	2	2	0	167.158	39.55	-0.125538	2		-1	-1	0	0	-1	-1	7.29392	-1	-1	-1	-1
259	45	40	2	2	0	128.841	38.0777	2.65716	2		-1	-1	0	0	-1	-1	7.28982	-1	-1	-1	-1
332	52	33	2	2	1	201.638	36.7338	2.43572	2		-1	-1	0	0	2	-1	7.28807	-1	-1	-1	-1
342	68	84	3	3	0	211.55	27.8004	-1.90779	2		-1	-1	0	0	-1	-1	7.23732	-1	-1	-1	-1
269	55	48	3	3	0	138.732	25.4402	2.73352	2		-1	-1	0	0	-1	-1	7.23079	-1	-1	-1	-1
160	112	57	1	1	0	29.0669	34.1205	0.149024	2		-1	-1	0	0	-1	-1	7.22467	-1	-1	-1	-1
201	88	32	2	2	0	70.7319	30.3022	1.2738	2		-1	-1	0	0	-1	-1	7.21588	-1	-1	-1	-1
220.525	113.167	39	1	1	1	90.4847	41.5992	0.594103	2		-1	-1	0	0	2	-1	7.20565	-1	-1	-1	-1
238	59	29	2	2	0	108.191	36.1203	2.16467	2		-1	-1	0	0	-1	-1	7.19416	-1	-1	-1	-1
340	90	34	3	4	1	209.994	26.8526	1.19094	2		-1	-1	0	0	-1	-1	7.19235	-1	-1	-1	-1
214	110	57	2	2	1	83.6815	32.7318	0.159777	2		-1	-1	0	0	-1	-1	7.18757	-1	-1	-1	-1
248	67	26	2	2	0	118.339	35.4527	1.92949	2		-1	-1	0	0	-1	-1	7.18365	-1	-1	-1	-1
144	60.241	39.5622	1	1	0	13.7164	27.1773	2.35517	2		-1	-1	0	0	-1	-1	7.17917	-1	-1	-1	-1
286	107	78	2	2	0	155.756	34.6834	-0.521109	2		-1	-1	0	0	-1	-1	7.17228	-1	-1	-1	-1
366	112	76	2	2	0	236.098	37.5297	-0.43327	2		-1	-1	0	0	-1	-1	7.14959	-1	-1	-1	-1
332	106	91	2	2	0	201.846	42.6285	-0.814352	2		-1	-1	0	0	-1	-1	7.14354	-1	-1	-1	-1
380	94	33	3	3	0	249.646	29.521	1.09413	2		-1	-1	0	0	-1	-1	7.13997	-1	-1	-1	-1
309	106	63	3	3	0	179.065	28.0745	-0.0993995	2		-1	-1	0	0	-1	-1	7.13279	-1	-1	-1	-1
311	116	49	2	2	0	181.393	38.908	0.305917	2		-1	-1	0	0	-1	-1	7.12372	-1	-1	-1	-1
326	40	58	2	2	1	195.295	38.4828	-3.09616	1.56971		-1	-1	0	0	2	-1	7.12245	-1	-1	-1	-1
302	105	64	3	3	0	172.034	27.3374	-0.136685	2		-1	-1	0	0	-1	-1	7.11954	-1	-1	-1	-1
401	113	77	2	2	0	271.158	38.5497	-0.438855	2		-1	-1	0	0	-1	-1	7.11399	-1	-1	-1	-1
280	91	80	3	3	0	149.479	24.6178	-0.951214	2		-1	-1	0	0	-1	-1	7.10871	-1	-1	-1	-1
280	71	35	3	3	0	150.174	25.1264	1.90507	2		-1	-1	0	0	-1	-1	7.10423	-1	-1	-1	-1
278	94	40	3	3	0	148.369	25.0931	0.928051	2		-1	-1	0	0	-1	-1	7.08456	-1	-1	-1	-1
372	80	42	5	5	0	241.675	16.3955	1.56253	2		-1	-1	0	0	-1	-1	7.07604	-1	-1	-1	-1
328	53	48	3	3	0	197.546	27.5503	2.81081	2		-1	-1	0	0	-1	-1	7.05998	-1	-1	-1	-1
379	108	61	3	3	0	248.969	29.1342	-0.0320697	2		-1	-1	0	0	-1	-1	7.05403	-1	-1	-1	-1
212	62	31	2	2	0	82.0043	33.1854	2.11192	2		-1	-1	0	0	-1	-1	7.0498	-1	-1	-1	-1
223	104	72	3	3	0	92.6056	29.0449	-0.358708	2		-1	-1	0	0	-1	-1	7.04676	-1	-1	-1	-1
338	109	81	2	2	0	207.982	37.8947	-0.583913	2		-1	-1	0	0	-1	-1	7.02033	-1	-1	-1	-1
241	102	63	3	3	0	110.826	24.6983	-0.0652436	2		-1	-1	0	0	-1	-1	7.01654	-1	-1	-1	-1
200	72	29	2	2	0	69.8341	31.9062	1.80115	2		-1	-1	0	0	-1	-1	7.01578	-1	-1	-1	-1
240	48	42	2	2	0	109.903	34.5451	2.65039	2		-1	-1	0	0	-1	-1	6.99596	-1	-1	-1	-1
201	91	43	3	3	0	70.6865	22.0422	0.968567	2		-1	-1	0	0	-1	-1	6.98564	-1	-1	-1	-1
197	49	73	2	2	0	66.9558	31.1756	-2.66952	2		-1	-1	0	0	-1	-1	6.98534	-1	-1	-1	-1
294	119	57	2	2	1	164.349	40.9777	0.102562	2		-1	-1	0	0	-1	-1	6.97109	-1	-1	-1	-1
367	109	31	2	2	0	236.875	40.6625	0.794042	2		-1	-1	0	0	-1	-1	6.95935	-1	-1	-1	-1
337	104	31	2	2	0	207.193	37.3146	0.879234	2		-1	-1	0	0	-1	-1	6.94671	-1	-1	-1	-1
207	72	30	2	2	0	76.9196	30.8904	1.80554	2		-1	-1	0	0	-1	-1	6.94077	-1	-1	-1	-1
329	85	24	2	3	1	199.12	35.0082	1.44143	2		-1	-1	0	0	-1	-1	6.91672	-1	-1	-1	-1
445	51	90	2	2	0	315.54	41.4924	-2.25965	2		-1	-1	0	0	-1	-1	6.914	-1	-1	-1	-1
342	118	50	2	2	0	212.21	40.203	0.265307	2		-1	-1	0	0	-1	-1	6.89212	-1	-1	-1	-1
195	96	35	2	2	0	64.5636	31.4198	1.00002	2		-1	-1	0	0	-1	-1	6.89017	-1	-1	-1	-1
244	74	27	2	3	1	114.348	33.1156	1.73371	2		-1	-1	0	0	-1	-1	6.88299	-1	-1	-1	-1
261	71	93	2	2	0	129.954	34.0608	-1.71053	2		-1	-1	0	0	-1	-1	6.86752	-1	-1	-1	-1
117	57	78	1	1	0	-12.5637	28.6516	-2.3782	2		-1	-1	0	0	-1	-1	6.85701	-1	-1	-1	-1
461	121	46	2	2	1	330.318	44.1174	0.378084	2		-1	-1	0	0	-1	-1	6.85216	-1	-1	-1	-1
292	66	23	2	2	0	162.278	37.886	1.95118	2		-1	-1	0	0	-1	-1	6.85009	-1	-1	-1	-1
249	48	42	2	2	0	118.871	34.5072	2.65552	2		-1	-1	0	0	-1	-1	6.84923	-1	-1	-1	-1
179	75	33	2	2	0	48.5534	27.4966	1.7269	2		-1	-1	0	0	-1	-1	6.84759	-1	-1	-1	-1
265	104	61	3	3	0	135.007	26.3492	-0.000445519	2		-1	-1	0	0	-1	-1	6.83977	-1	-1	-1	-1
226	85	32	2	3	1	96.1255	29.2225	1.36551	2		-1	-1	0	0	-1	-1	6.83784	-1	-1	-1	-1
194	105	48	2	2	0	63.4794	30.1271	0.482379	2		-1	-1	0	0	-1	-1	6.83729	-1	-1	-1	-1
342	51	70	3	3	0	211.423	30.0263	-2.68563	2		-1	-1	0	0	-1	-1	6.83315	-1	-1	-1	-1
188	85	34	2	3	1	57.556	27.4278	1.3551	2		-1	-1	0	0	-1	-1	6.83259	-1	-1	-1	-1
461	84	98	2	2	0	331.817	38.3671	-1.38658	2		-1	-1	0	0	-1	-1	6.83188	-1	-1	-1	-1
372	117	48	2	2	0	241.973	39.451	0.322616	2		-1	-1	0	0	-1	-1	6.83166	-1	-1	-1	-1
322	85	25	2	3	1	192.195	34.1064	1.43389	2		-1	-1	0	0	-1	-1	6.8265	-1	-1	-1	-1
164	45	68	1	1	0	34.3993	33.8528	-2.85177	2		-1	-1	0	0	-1	-1	6.81877	-1	-1	-1	-1
319	53	48	3	3	0	188.559	27.4818	2.8062	2		-1	-1	0	0	-1	-1	6.81601	-1	-1	-1	-1
332	68	84	3	3	0	201.451	27.7057	-1.90487	2		-1	-1	0	0	-1	-1	6.80119	-1	-1	-1	-1
171	99	42	2	2	0	40.1956	27.9647	0.769758	2		-1	-1	0	0	-1	-1	6.79589	-1	-1	-1	-1
173	94	37	2	2	1	42.2429	28.3771	1.02073	1.56971		-1	-1	0	0	2	-1	6.78768	-1	-1	-1	-1
152	100	36	1	1	1	20.9216	32.4352	0.889886	2		-1	-1	0	0	2	-1	6.78659	-1	-1	-1	-1
513	85	21	2	2	0	381.383	40.9909	1.47936	2		-1	-1	0	0	-1	-1	6.78571	-1	-1	-1	-1
341	37	70	2	2	0	210.264	43.2564	-2.81176	2		-1	-1	0	0	-1	-1	6.78466	-1	-1	-1	-1
374	86	22	2	3	1	243.576	37.0505	1.43612	2		-1	-1	0	0	2	-1	6.782	-1	-1	-1	-1
395	67	47	5	5	0	264.566	16.7209	2.43389	2		-1	-1	0	0	-1	-1	6.77978	-1	-1	-1	-1
284	67	24	2	2	0	154.33	36.745	1.92989	2		-1	-1	0	0	-1	-1	6.77925	-1	-1	-1	-1
350	105	30	2	2	1	220.047	38.6052	0.879765	2		-1	-1	0	0	2	-1	6.77574	-1	-1	-1	-1
343	104	30	2	2	0	213.124	37.9909	0.89795	2		-1	-1	0	0	-1	-1	6.77162	-1	-1	-1	-1
316	79	44	6	6	0	185.951	14.5539	1.58351	2		-1	-1	0	0	-1	-1	6.75619	-1	-1	-1	-1
401	52	86	2	2	0	271.056	38.49	-2.2947	2		-1	-1	0	0	-1	-1	6.75495	-1	-1	-1	-1
203	96	35	2	2	0	72.7064	31.446	0.998211	2		-1	-1	0	0	-1	-1	6.75378	-1	-1	-1	-1
292	97	40	3	3	0	162.374	26.7875	0.84069	2		-1	-1	0	0	-1	-1	6.75164	-1	-1	-1	-1
279	39	67	2	2	0	148.087	39.6324	-2.88704	2		-1	-1	0	0	-1	-1	6.75044	-1	-1	-1	-1
288	114	50	2	2	0	158.419	37.1226	0.30129	2		-1	-1	0	0	-1	-1	6.74997	-1	-1	-1	-1
327	116	50	2	2	0	197.289	38.4351	0.277481	2		-1	-1	0	0	-1	-1	6.73944	-1	-1	-1	-1
217	70	92	2	2	0	86.4546	32.5291	-1.74469	2		-1	-1	0	0	-1	-1	6.73015	-1	-1	-1	-1
232	84	31	2	3	1	102.214	29.8667	1.40621	2		-1	-1	0	0	-1	-1	6.7275	-1	-1	-1	-1
284	85	27	2	3	1	154.507	32.8492	1.41058	2		-1	-1	0	0	-1	-1	6.72533	-1	-1	-1	-1
263	94	41	3	3	0	133.329	24.7003	0.90498	2		-1	-1	0	0	-1	-1	6.72354	-1	-1	-1	-1
151	54	57	2	2	1	21.1248	24.3622	3.07598	2		-1	-1	0	0	-1	-1	6.71261	-1	-1	-1	-1
294	104	63	3	3	0	164.032	26.2606	-0.100546	2		-1	-1	0	0	-1	-1	6.70576	-1	-1	-1	-1
212.134	105.996	49	2	3	0	81.8659	30.7308	0.435977	2		-1	-1	0	0	-1	-1	6.70443	-1	-1	-1	-1
348	50	48	3	3	0	217.497	30.5205	2.8539	2		-1	-1	0	0	-1	-1	6.70429	-1	-1	-1	-1
194	106	85	1	1	0	63.5123	37.5866	-0.6554	2		-1	-1	0	0	-1	-1	6.69465	-1	-1	-1	-1
392	113	78	2	2	0	262.16	39.1273	-0.463528	2		-1	-1	0	0	-1	-1	6.69386	-1	-1	-1	-1
343	106	62	3	3	0	213.037	27.5683	-0.0770001	2		-1	-1	0	0	-1	-1	6.69088	-1	-1	-1	-1
283	109	35	2	2	0	153.663	39.3287	0.715829	2		-1	-1	0	0	-1	-1	6.68707	-1	-1	-1	-1
351	108	61	3	3	0	221.042	29.3654	-0.0350669	2		-1	-1	0	0	-1	-1	6.68648	-1	-1	-1	-1
277	118	57	2	2	0	147.31	40.2224	0.112019	2		-1	-1	0	0	-1	-1	6.66883	-1	-1	-1	-1
501	50	89	2	3	1	371.892	40.1838	-2.3195	1.91394		-1	-1	0	0	-1	-1	6.66873	-1	-1	-1	-1
439	115	78	2	2	0	309.201	40.3889	-0.422197	2		-1	-1	0	0	-1	-1	6.66604	-1	-1	-1	-1
363	110	82	2	2	0	233.096	39.1163	-0.593302	2		-1	-1	0	0	-1	-1	6.66282	-1	-1	-1	-1
136	92.7281	37.4108	1	1	1	5.08438	26.4799	1.05926	2		-1	-1	0	0	2	-1	6.65176	-1	-1	-1	-1
158	110	67	1	1	0	27.2613	32.6799	-0.155739	2		-1	-1	0	0	-1	-1	6.65136	-1	-1	-1	-1
286	111	41	2	2	0	156.561	37.6444	0.556029	2		-1	-1	0	0	-1	-1	6.65005	-1	-1	-1	-1
140	52	56	1	1	0	10.1481	26.653	3.0558	2		-1	-1	0	0	-1	-1	6.64854	-1	-1	-1	-1
326	58	25	2	2	0	195.822	39.2073	2.1775	2		-1	-1	0	0	-1	-1	6.62943	-1	-1	-1	-1
228	56	38	2	3	1	98.0092	30.8597	2.39585	2		-1	-1	0	0	-1	-1	6.62595	-1	-1	-1	-1
223	104	30	1	1	0	93.1174	40.272	0.906925	2		-1	-1	0	0	-1	-1	6.6222	-1	-1	-1	-1
368	69	31	3	3	0	237.561	29.0774	1.97523	2		-1	-1	0	0	-1	-1	6.62067	-1	-1	-1	-1
281	74	22	2	2	0	151.481	37.3459	1.73212	2		-1	-1	0	0	-1	-1	6.61914	-1	-1	-1	-1
375	105	41	3	3	1	244.821	31.3123	0.645292	2		-1	-1	0	0	2	-1	6.61718	-1	-1	-1	-1
266	112	48	2	2	0	136.389	36.1598	0.379142	2		-1	-1	0	0	-1	-1	6.6161	-1	-1	-1	-1
296	111	42	2	2	0	166.51	36.9674	0.529509	2		-1	-1	0	0	-1	-1	6.60744	-1	-1	-1	-1
231	101	60	3	3	0	100.808	23.5575	0.0635938	2		-1	-1	0	0	-1	-1	6.60548	-1	-1	-1	-1
314	94	93	2	2	0	183.507	37.8299	-1.08668	2		-1	-1	0	0	-1	-1	6.6045	-1	-1	-1	-1
235	83	45	4	5	1	105.011	16.0783	1.27538	2		-1	-1	0	0	-1	-1	6.60316	-1	-1	-1	-1
224	74	28	2	2	0	94.1412	32.4334	1.7336	2		-1	-1	0	0	-1	-1	6.59897	-1	-1	-1	-1
332	86	40	4	5	1	201.981	19.831	1.24269	2		-1	-1	0	0	-1	-1	6.59533	-1	-1	-1	-1
223	46	49	2	2	0	92.864	33.3884	2.85456	2		-1	-1	0	0	-1	-1	6.59449	-1	-1	-1	-1
295	71	36	3	3	0	165.082	23.9382	1.92796	2		-1	-1	0	0	-1	-1	6.585	-1	-1	-1	-1
226	35.7143	54.4074	1	1	0	95.7639	42.1227	3.06	2		-1	-1	0	0	-1	-1	6.58477	-1	-1	-1	-1
306	113	42	2	2	0	176.484	38.5629	0.503639	2		-1	-1	0	0	-1	-1	6.57849	-1	-1	-1	-1
334	117	50	2	2	0	204.254	39.3197	0.27108	2		-1	-1	0	0	-1	-1	6.57515	-1	-1	-1	-1
359	70	32	3	3	0	228.64	27.7519	1.9515	2		-1	-1	0	0	-1	-1	6.57474	-1	-1	-1	-1
270	65	44	4	4	0	139.935	19.9829	2.31999	2		-1	-1	0	0	-1	-1	6.56792	-1	-1	-1	-1
339	52	47	3	3	0	208.527	28.9462	2.79593	2		-1	-1	0	0	-1	-1	6.56153	-1	-1	-1	-1
350	69	31	3	3	0	219.7	28.994	1.97057	2		-1	-1	0	0	-1	-1	6.55733	-1	-1	-1	-1
315	86	26	2	3	1	185.275	33.4378	1.3966	2		-1	-1	0	0	-1	-1	6.55659	-1	-1	-1	-1
252	75	27	2	3	1	122.401	32.87	1.70582	2		-1	-1	0	0	-1	-1	6.5562	-1	-1	-1	-1
345	39	48	2	2	0	214.384	41.0143	2.94417	2		-1	-1	0	0	-1	-1	6.55214	-1	-1	-1	-1
399	94	49	5	5	0	268.695	17.7544	0.630163	2		-1	-1	0	0	-1	-1	6.54903	-1	-1	-1	-1
286	94	40	3	4	1	156.354	24.8978	0.926981	2		-1	-1	0	0	-1	-1	6.54788	-1	-1	-1	-1
317	52	85	2	2	0	186.089	37.3587	-2.29778	2		-1	-1	0	0	-1	-1	6.54595	-1	-1	-1	-1
318	115	74	2	2	0	188.046	39.7551	-0.343235	2		-1	-1	0	0	-1	-1	6.53908	-1	-1	-1	-1
431	50	89	2	2	0	301.395	41.6908	-2.28833	2		-1	-1	0	0	-1	-1	6.53503	-1	-1	-1	-1
272	75	21	2	2	0	142.552	38.436	1.70004	2		-1	-1	0	0	-1	-1	6.53277	-1	-1	-1	-1
290	75	41	4	5	1	160.065	18.2138	1.79374	1.91394		-1	-1	0	0	-1	-1	6.53054	-1	-1	-1	-1
233	44	49	2	2	0	102.801	35.2512	2.87755	2		-1	-1	0	0	-1	-1	6.5262	-1	-1	-1	-1
212	112	66	2	2	0	81.5851	35.0084	-0.104306	2		-1	-1	0	0	-1	-1	6.52391	-1	-1	-1	-1
210	95	35	2	2	0	79.8348	30.8598	1.02276	2		-1	-1	0	0	-1	-1	6.51628	-1	-1	-1	-1
221	106	48	2	2	1	90.8683	31.1002	0.463008	1.56971		-1	-1	0	0	2	-1	6.51076	-1	-1	-1	-1
270	85	28	2	3	1	140.523	32.2052	1.40049	2		-1	-1	0	0	-1	-1	6.50465	-1	-1	-1	-1
318	74	21	2	2	0	188.148	37.7695	1.74406	2		-1	-1	0	0	-1	-1	6.50376	-1	-1	-1	-1
397	50	71	3	3	0	266.806	31.6081	-2.68162	2		-1	-1	0	0	-1	-1	6.50093	-1	-1	-1	-1
330	89	34	3	4	1	200.077	26.5462	1.22218	2		-1	-1	0	0	-1	-1	6.50025	-1	-1	-1	-1
145	76	37	1	1	0	14.3825	22.9908	1.72793	2		-1	-1	0	0	-1	-1	6.4995	-1	-1	-1	-1
368	37	58	2	2	1	237.442	41.9039	-3.09281	2		-1	-1	0	0	2	-1	6.49879	-1	-1	-1	-1
387	71	50	6	6	0	256.634	11.6793	2.38546	2		-1	-1	0	0	-1	-1	6.49872	-1	-1	-1	-1
149	46	62	1	1	0	19.3574	32.2785	-3.02086	2		-1	-1	0	0	-1	-1	6.4972	-1	-1	-1	-1
249	55	37	2	3	1	119.026	32.0859	2.4069	2		-1	-1	0	0	-1	-1	6.49485	-1	-1	-1	-1
178	94	36	2	2	0	47.3078	29.2836	1.03911	2		-1	-1	0	0	-1	-1	6.49464	-1	-1	-1	-1
420	68	47	5	5	0	289.524	16.3554	2.37741	2		-1	-1	0	0	-1	-1	6.49306	-1	-1	-1	-1
241	67	26	2	2	0	111.303	35.5671	1.92708	2		-1	-1	0	0	-1	-1	6.49019	-1	-1	-1	-1
167	49	59	2	2	1	37.1853	28.9202	-3.1272	2		-1	-1	0	0	2	-1	6.47849	-1	-1	-1	-1
409	51	87	2	2	0	279.148	39.8358	-2.29749	2		-1	-1	0	0	-1	-1	6.47732	-1	-1	-1	-1
197	98	29	1	2	1	66.5849	37.5083	1.05044	2		-1	-1	0	0	-1	-1	6.47269	-1	-1	-1	-1
364	116	40	2	2	0	233.999	41.4023	0.515266	2		-1	-1	0	0	-1	-1	6.47159	-1	-1	-1	-1
311	83	93	2	2	0	180.331	34.7103	-1.37773	2		-1	-1	0	0	-1	-1	6.46671	-1	-1	-1	-1
253	58	29	2	2	0	123.212	36.4524	2.19482	2		-1	-1	0	0	-1	-1	6.45556	-1	-1	-1	-1
186	45	67	2	2	1	56.1286	33.2925	-2.88506	2		-1	-1	0	0	2	-1	6.45547	-1	-1	-1	-1
302	119	58	2	2	0	172.324	40.8324	0.0747887	2		-1	-1	0	0	-1	-1	6.44535	-1	-1	-1	-1
221	83	32	2	3	1	91.0572	28.8305	1.43308	2		-1	-1	0	0	-1	-1	6.44407	-1	-1	-1	-1
246	61	90	2	2	0	115.049	34.3299	-2.01622	2		-1	-1	0	0	-1	-1	6.44158	-1	-1	-1	-1
325	106	64	3	3	1	195.046	28.0833	-0.142535	1.56971		-1	-1	0	0	2	-1	6.43371	-1	-1	-1	-1
311	96	26	2	3	1	181.449	37.0996	1.12989	2		-1	-1	0	0	-1	-1	6.43148	-1	-1	-1	-1
358	104	29	2	2	1	227.939	38.6379	0.917824	2		-1	-1	0	0	2	-1	6.43102	-1	-1	-1	-1
369	69	85	3	3	0	238.826	28.4385	-1.86996	2		-1	-1	0	0	-1	-1	6.42585	-1	-1	-1	-1
333	69	33	3	3	0	202.827	27.1179	1.98828	2		-1	-1	0	0	-1	-1	6.42284	-1	-1	-1	-1
217	116	46	1	1	0	86.8138	41.142	0.412647	2		-1	-1	0	0	-1	-1	6.41676	-1	-1	-1	-1
146.443	54.0735	63	2	1	0	16.6696	24.3851	-2.95717	2		-1	-1	0	0	-1	-1	6.40996	-1	-1	-1	-1
209	44	66	2	2	0	78.8429	33.9241	-2.91848	2		-1	-1	0	0	-1	-1	6.40913	-1	-1	-1	-1
459	37	60	2	2	1	328.863	42.1405	-3.08162	2		-1	-1	0	0	-1	-1	6.4055	-1	-1	-1	-1
317	107	61	3	3	0	187.099	28.7344	-0.0294832	2		-1	-1	0	0	-1	-1	6.40494	-1	-1	-1	-1
266	107	78	2	2	0	135.671	34.6615	-0.506708	2		-1	-1	0	0	-1	-1	6.40482	-1	-1	-1	-1
162	99	72	2	3	1	31.5475	24.1211	-0.455893	1.74182		-1	-1	0	0	-1	-1	6.40251	-1	-1	-1	-1
187	94	36	2	2	0	56.4502	29.3936	1.03697	2		-1	-1	0	0	-1	-1	6.40093	-1	-1	-1	-1
306	52	34	2	2	0	175.792	36.0133	2.44353	2		-1	-1	0	0	-1	-1	6.39844	-1	-1	-1	-1
233	103	39	2	2	0	103.165	33.1515	0.747368	2		-1	-1	0	0	-1	-1	6.39537	-1	-1	-1	-1
371	98	24	2	2	0	240.709	39.2949	1.12079	2		-1	-1	0	0	-1	-1	6.39477	-1	-1	-1	-1
359	91	34	3	4	1	228.824	27.1857	1.16346	2		-1	-1	0	0	-1	-1	6.39322	-1	-1	-1	-1
126	91	66	1	1	0	-4.39585	13.9359	-0.423681	2		-1	-1	0	0	-1	-1	6.39314	-1	-1	-1	-1
92.513	78.1699	65.8101	1	1	1	-37.6394	6.90681	-1.67182	1.91394		-1	-1	0	0	2	-1	6.38991	-1	-1	-1	-1
288	116	66	2	2	0	158.127	38.6559	-0.125282	2		-1	-1	0	0	-1	-1	6.3892	-1	-1	-1	-1
143	58	52	2	2	0	12.9688	21.7894	2.83029	2		-1	-1	0	0	-1	-1	6.38466	-1	-1	-1	-1
429	82	99	2	2	0	299.616	39.9396	-1.44255	2		-1	-1	0	0	-1	-1	6.37907	-1	-1	-1	-1
164	61	33	1	1	0	33.6277	32.042	2.18514	2		-1	-1	0	0	-1	-1	6.3779	-1	-1	-1	-1
353	79	42	5	5	0	222.768	16.3061	1.61392	2		-1	-1	0	0	-1	-1	6.37719	-1	-1	-1	-1
321	38	69	2	2	0	190.132	41.7624	-2.83052	2		-1	-1	0	0	-1	-1	6.3767	-1	-1	-1	-1
232	99	85	3	3	0	101.425	32.8995	-0.799257	2		-1	-1	0	0	-1	-1	6.37447	-1	-1	-1	-1
226	102	38	2	2	0	96.0677	33.1291	0.792017	2		-1	-1	0	0	-1	-1	6.36906	-1	-1	-1	-1
130	69	29	1	1	0	-0.61961	32.0827	1.93082	2		-1	-1	0	0	-1	-1	6.3685	-1	-1	-1	-1
217	112.952	36.5502	1	1	0	86.9106	42.743	0.646743	2		-1	-1	0	0	-1	-1	6.36407	-1	-1	-1	-1
356	98	25	2	2	0	225.907	38.4414	1.10472	2		-1	-1	0	0	-1	-1	6.36016	-1	-1	-1	-1
165	94	38	2	2	0	34.1453	27.4058	1.00172	2		-1	-1	0	0	-1	-1	6.35562	-1	-1	-1	-1
271	39	68	2	2	0	140.098	39.7063	-2.86613	2		-1	-1	0	0	-1	-1	6.3552	-1	-1	-1	-1
159	52	71	2	2	0	29.3789	28.2112	-2.6884	2		-1	-1	0	0	-1	-1	6.35285	-1	-1	-1	-1
186	112	75	1	1	0	55.4213	37.3335	-0.344484	2		-1	-1	0	0	-1	-1	6.34932	-1	-1	-1	-1
284	54	48	3	3	0	153.666	26.3708	2.76457	2		-1	-1	0	0	-1	-1	6.34904	-1	-1	-1	-1
371	81	95	2	2	0	240.99	36.7028	-1.4574	2		-1	-1	0	0	-1	-1	6.34744	-1	-1	-1	-1
216	57	38	2	3	1	85.981	30.2762	2.36883	2		-1	-1	0	0	-1	-1	6.34389	-1	-1	-1	-1
312	92	81	3	3	0	181.63	26.2598	-0.965079	2		-1	-1	0	0	-1	-1	6.34124	-1	-1	-1	-1
310	121	57	2	2	0	180.35	42.7484	0.0944723	2		-1	-1	0	0	-1	-1	6.3412	-1	-1	-1	-1
287	71	35	3	3	0	157.144	25.0129	1.9102	2		-1	-1	0	0	-1	-1	6.33941	-1	-1	-1	-1
272	110	35	2	2	0	142.675	40.3771	0.703115	2		-1	-1	0	0	-1	-1	6.33627	-1	-1	-1	-1
412.938	47.4757	47	3	2	0	282.422	33.7963	2.84053	2		-1	-1	0	0	-1	-1	6.33502	-1	-1	-1	-1
310	43	76	2	2	0	179.034	39.3195	-2.62752	2		-1	-1	0	0	-1	-1	6.33404	-1	-1	-1	-1
374	98	45	4	4	0	243.808	23.2778	0.668865	2		-1	-1	0	0	-1	-1	6.32732	-1	-1	-1	-1
278	97	29	2	3	1	148.642	35.7613	1.06223	2		-1	-1	0	0	-1	-1	6.32722	-1	-1	-1	-1
305	39	57	2	2	1	174.256	39.2447	-3.12833	1.56971		-1	-1	0	0	2	-1	6.32615	-1	-1	-1	-1
308	111	34	2	2	0	178.562	40.9819	0.701645	2		-1	-1	0	0	-1	-1	6.32399	-1	-1	-1	-1
267	46	40	2	2	0	136.812	37.206	2.64848	2		-1	-1	0	0	-1	-1	6.32333	-1	-1	-1	-1
279	116	65	2	2	0	149.12	38.5764	-0.0944831	2		-1	-1	0	0	-1	-1	6.32224	-1	-1	-1	-1
368.761	91.9393	32	3	4	0	238.493	29.3895	1.16828	2		-1	-1	0	0	-1	-1	6.32191	-1	-1	-1	-1
139	104	49	1	1	0	8.07249	27.7652	0.455729	2		-1	-1	0	0	-1	-1	6.31973	-1	-1	-1	-1
264	110	41	2	2	0	134.51	37.241	0.57653	2		-1	-1	0	0	-1	-1	6.30927	-1	-1	-1	-1
350	51	32	2	2	0	219.525	38.2348	2.43976	2		-1	-1	0	0	-1	-1	6.3019	-1	-1	-1	-1
277	66	23	2	2	0	147.378	38.1145	1.94372	2		-1	-1	0	0	-1	-1	6.29874	-1	-1	-1	-1
350	41	77	2	2	0	219.372	42.1209	-2.62504	2		-1	-1	0	0	-1	-1	6.29416	-1	-1	-1	-1
261	97	62	4	4	0	130.895	19.5002	-0.0674532	2		-1	-1	0	0	-1	-1	6.29412	-1	-1	-1	-1
135.255	96.5291	54.1675	2	1	0	4.55424	18.8845	0.355178	2		-1	-1	0	0	2	-1	6.29335	-1	-1	-1	-1
334	74	18	2	2	0	203.973	40.626	1.74063	2		-1	-1	0	0	-1	-1	6.29182	-1	-1	-1	-1
334	93	82	3	3	0	203.773	27.6853	-0.965889	2		-1	-1	0	0	-1	-1	6.28677	-1	-1	-1	-1
201	98	81	3	3	0	70.5552	29.043	-0.73019	2		-1	-1	0	0	-1	-1	6.28621	-1	-1	-1	-1
143	60	49	2	2	0	12.8811	21.2971	2.6643	2		-1	-1	0	0	-1	-1	6.28385	-1	-1	-1	-1
235	110	50	2	2	1	105.039	34.072	0.357406	1.56971		-1	-1	0	0	2	-1	6.28158	-1	-1	-1	-1
418	50	89	2	2	0	288.271	41.8661	-2.2837	2		-1	-1	0	0	-1	-1	6.28153	-1	-1	-1	-1
368	74	18	2	2	0	237.539	40.6359	1.74863	2		-1	-1	0	0	-1	-1	6.27772	-1	-1	-1	-1
393	96	87	3	2	1	263.192	33.1082	-0.9767	1.91394		-1	-1	0	0	-1	-1	6.27727	-1	-1	-1	-1
117	65	50	1	1	0	-13.1858	16.7061	2.60069	2		-1	-1	0	0	-1	-1	6.27271	-1	-1	-1	-1
344	93	82	3	3	0	213.838	27.67	-0.970211	2		-1	-1	0	0	-1	-1	6.27271	-1	-1	-1	-1
213	121	63	1	1	0	82.5903	43.6359	-0.00331652	2		-1	-1	0	0	-1	-1	6.27181	-1	-1	-1	-1
140	85	70	3	3	0	9.77804	12.1622	-0.938659	2		-1	-1	0	0	-1	-1	6.27016	-1	-1	-1	-1
201	44	66	2	2	0	70.9467	33.961	-2.91958	2		-1	-1	0	0	-1	-1	6.26888	-1	-1	-1	-1
181	59	41	2	2	0	50.8366	26.9252	2.39527	2		-1	-1	0	0	-1	-1	6.26475	-1	-1	-1	-1
312	96	47	4	4	0	182.152	21.1514	0.636424	2		-1	-1	0	0	-1	-1	6.26416	-1	-1	-1	-1
324	104	31	2	2	0	194.345	37.4907	0.877979	2		-1	-1	0	0	-1	-1	6.26279	-1	-1	-1	-1
322	61	70	4	4	0	191.419	20.8981	-2.50082	2		-1	-1	0	0	-1	-1	6.26193	-1	-1	-1	-1
98.5371	62.3925	46	1	1	1	-31.6627	21.263	2.53536	2		-1	-1	0	0	2	-1	6.25781	-1	-1	-1	-1
155	60	84	1	1	0	25.4709	30.0176	-2.16078	2		-1	-1	0	0	-1	-1	6.2577	-1	-1	-1	-1
242	97	32	2	2	0	112.382	34.0977	1.01818	2		-1	-1	0	0	-1	-1	6.25669	-1	-1	-1	-1
176	51	73	2	2	0	46.2209	29.6023	-2.64239	2		-1	-1	0	0	-1	-1	6.24873	-1	-1	-1	-1
398	75	48	6	6	0	267.607	11.3718	1.99463	2		-1	-1	0	0	-1	-1	6.24702	-1	-1	-1	-1
347	71	72	4	4	0	216.656	15.7141	-2.02743	2		-1	-1	0	0	-1	-1	6.24091	-1	-1	-1	-1
175	44	69	1	1	0	45.2935	34.8666	-2.83304	2		-1	-1	0	0	-1	-1	6.23436	-1	-1	-1	-1
290	59	54	4	4	0	159.595	19.6448	2.94272	2		-1	-1	0	0	-1	-1	6.23216	-1	-1	-1	-1
225	91	89	3	3	0	94.3864	31.7968	-1.07293	2		-1	-1	0	0	-1	-1	6.23079	-1	-1	-1	-1
306	60	93	2	2	0	174.968	38.8486	-2.00241	2		-1	-1	0	0	-1	-1	6.23048	-1	-1	-1	-1
357	50	33	2	2	0	226.478	38.3474	2.4778	2		-1	-1	0	0	-1	-1	6.22979	-1	-1	-1	-1
479	84	21	2	2	0	347.582	39.7343	1.50399	2		-1	-1	0	0	-1	-1	6.22857	-1	-1	-1	-1
392	37	48	2	2	0	261.438	43.3523	2.95299	2		-1	-1	0	0	-1	-1	6.22407	-1	-1	-1	-1
124	66	51	1	1	0	-6.18943	15.2773	2.60677	2		-1	-1	0	0	-1	-1	6.22392	-1	-1	-1	-1
262	66	45	4	4	0	131.94	18.6549	2.30322	2		-1	-1	0	0	-1	-1	6.22284	-1	-1	-1	-1
302	71	34	3	3	0	172.073	25.7633	1.90993	2		-1	-1	0	0	-1	-1	6.22278	-1	-1	-1	-1
249	47	30	1	1	1	119.104	42.6944	2.42509	2		-1	-1	0	0	2	-1	6.22165	-1	-1	-1	-1
284	118	57	2	2	0	154.328	40.1234	0.108458	2		-1	-1	0	0	-1	-1	6.22068	-1	-1	-1	-1
208	85	33	2	3	1	77.8566	28.416	1.35905	2		-1	-1	0	0	-1	-1	6.22017	-1	-1	-1	-1
215	98	83	3	3	0	84.4977	30.591	-0.776614	2		-1	-1	0	0	-1	-1	6.21602	-1	-1	-1	-1
262	92	90	2	2	0	131.235	33.6417	-1.07323	2		-1	-1	0	0	-1	-1	6.20913	-1	-1	-1	-1
264	71	71	5	5	0	133.423	13.279	-2.0415	2		-1	-1	0	0	-1	-1	6.20631	-1	-1	-1	-1
319	104	32	2	2	0	189.389	36.8466	0.859198	2		-1	-1	0	0	-1	-1	6.19813	-1	-1	-1	-1
224	54	81	2	2	0	93.4718	31.2944	-2.36029	2		-1	-1	0	0	-1	-1	6.19571	-1	-1	-1	-1
260	106	78	2	2	0	129.637	33.803	-0.518191	2		-1	-1	0	0	-1	-1	6.19366	-1	-1	-1	-1
216	81	89	3	3	0	85.4751	28.8797	-1.39026	2		-1	-1	0	0	-1	-1	6.19264	-1	-1	-1	-1
210	57	38	2	2	0	79.9609	30.3223	2.36819	2		-1	-1	0	0	-1	-1	6.19064	-1	-1	-1	-1
479	50	32	2	2	0	348.029	40.6781	2.42458	2		-1	-1	0	0	-1	-1	6.18912	-1	-1	-1	-1
139	93	75	2	2	0	8.71588	21.0903	-0.749395	2		-1	-1	0	0	-1	-1	6.1865	-1	-1	-1	-1
353	85	23	2	3	1	222.826	35.8489	1.45312	2		-1	-1	0	0	-1	-1	6.18645	-1	-1	-1	-1
214	57	51	3	3	0	83.8672	22.4803	2.76947	2		-1	-1	0	0	-1	-1	6.17395	-1	-1	-1	-1
397	86	23	2	2	0	266.331	36.2672	1.43558	2		-1	-1	0	0	-1	-1	6.17343	-1	-1	-1	-1
199	57	52	3	3	0	68.8986	22.1785	2.8089	2		-1	-1	0	0	-1	-1	6.1705	-1	-1	-1	-1
141	53	77	1	1	1	11.4855	30.6325	-2.48874	2		-1	-1	0	0	2	-1	6.16939	-1	-1	-1	-1
325	67	33	3	3	0	194.865	27.9071	2.05139	2		-1	-1	0	0	-1	-1	6.16623	-1	-1	-1	-1
349	118	50	2	2	1	219.159	40.1296	0.265275	2		-1	-1	0	0	2	-1	6.16496	-1	-1	-1	-1
313	104	31	2	2	0	183.464	37.6793	0.877501	2		-1	-1	0	0	-1	-1	6.1642	-1	-1	-1	-1
97	89	64	1	1	1	-33.3839	10.9931	-0.408618	1.91394		1	-1	0	0	-1	-1	6.1632	-1	-1	-1	-1
331	37	70	2	2	0	200.182	43.1312	-2.81246	2		-1	-1	0	0	-1	-1	6.16045	-1	-1	-1	-1
369	105	91	2	2	0	239.128	41.7956	-0.839809	2		-1	-1	0	0	-1	-1	6.15921	-1	-1	-1	-1
319	97	26	2	3	1	189.369	37.4472	1.10758	2		-1	-1	0	0	-1	-1	6.15465	-1	-1	-1	-1
216	73	28	2	2	0	86.0437	32.6413	1.76395	2		-1	-1	0	0	-1	-1	6.1541	-1	-1	-1	-1
406	118	47	2	2	1	275.713	40.6218	0.34993	2		-1	-1	0	0	-1	-1	6.14788	-1	-1	-1	-1
188	47	59	2	2	1	58.0541	30.6447	-3.13061	2		-1	-1	0	0	-1	-1	6.14749	-1	-1	-1	-1
217	110	32	1	1	0	86.9598	43.1635	0.772669	2		-1	-1	0	0	-1	-1	6.14685	-1	-1	-1	-1
287	58	26	2	2	0	157.15	38.5908	2.17181	2		-1	-1	0	0	-1	-1	6.14291	-1	-1	-1	-1
400	80	64	6	6	0	269.845	5.43317	-1.34518	2		-1	-1	0	0	-1	-1	6.12561	-1	-1	-1	-1
405	81	43	5	5	0	274.535	15.8286	1.50776	2		-1	-1	0	0	-1	-1	6.12521	-1	-1	-1	-1
233	111	56	2	2	1	102.92	33.8033	0.179176	2		-1	-1	0	0	2	-1	6.12138	-1	-1	-1	-1
214	78	52	6	6	0	83.8056	8.37551	1.56072	2		-1	-1	0	0	-1	-1	6.12122	-1	-1	-1	-1
262	38	68	2	2	0	131.148	40.5428	-2.87563	2		-1	-1	0	0	-1	-1	6.11518	-1	-1	-1	-1
204	62	32	2	2	0	73.9324	32.3598	2.12663	2		-1	-1	0	0	-1	-1	6.11318	-1	-1	-1	-1
243	55	37	2	2	0	113.031	32.1394	2.4034	2		-1	-1	0	0	-1	-1	6.10944	-1	-1	-1	-1
238	42	67	2	2	0	107.452	36.1441	-2.89128	2		-1	-1	0	0	-1	-1	6.10899	-1	-1	-1	-1
232	113	65	2	2	0	101.775	35.8844	-0.0787921	2		-1	-1	0	0	-1	-1	6.10719	-1	-1	-1	-1
333	66	22	2	2	1	202.868	38.4839	1.96039	2		-1	-1	0	0	2	-1	6.10716	-1	-1	-1	-1
173	67	32	2	2	0	42.5936	30.2981	1.99243	2		-1	-1	0	0	-1	-1	6.10362	-1	-1	-1	-1
204	91	27	1	2	1	73.7833	36.0469	1.24318	2		-1	-1	0	0	-1	-1	6.10076	-1	-1	-1	-1
100	90	48	1	1	1	-30.6746	15.5481	0.853523	1.91394		1	-1	0	0	-1	-1	6.09831	-1	-1	-1	-1
354	103	43	3	3	0	223.983	28.6448	0.620404	2		-1	-1	0	0	-1	-1	6.09632	-1	-1	-1	-1
240	104	37	2	2	0	110.304	35.1058	0.770993	2		-1	-1	0	0	-1	-1	6.09599	-1	-1	-1	-1
108	58	40	1	1	0	-22.2237	28.4696	2.45599	2		-1	-1	0	0	-1	-1	6.08968	-1	-1	-1	-1
413	37.4355	58.1836	2	2	1	282.652	41.699	-3.1005	2		-1	-1	0	0	2	-1	6.08924	-1	-1	-1	-1
373	50	85	2	2	0	242.729	39.33	-2.34086	2		-1	-1	0	0	-1	-1	6.08675	-1	-1	-1	-1
390	39	60	2	2	1	259.58	40.0699	-3.04762	2		-1	-1	0	0	-1	-1	6.08348	-1	-1	-1	-1
283	52	35	2	2	1	152.912	35.3935	2.44944	2		-1	-1	0	0	2	-1	6.0834	-1	-1	-1	-1
232	107	46	2	2	0	102.053	32.7622	0.502903	2		-1	-1	0	0	-1	-1	6.07938	-1	-1	-1	-1
451	49	31	2	2	0	320.086	41.5975	2.43867	2		-1	-1	0	0	-1	-1	6.07889	-1	-1	-1	-1
358	71	72	4	4	0	227.716	15.7684	-2.03303	2		-1	-1	0	0	-1	-1	6.07839	-1	-1	-1	-1
408	68	46	5	5	0	277.53	16.9235	2.3443	2		-1	-1	0	0	-1	-1	6.07638	-1	-1	-1	-1
323	103	45	3	3	0	193.203	27.998	0.557979	2		-1	-1	0	0	-1	-1	6.0757	-1	-1	-1	-1
341	39	58	2	2	1	210.338	39.6546	-3.09318	2		-1	-1	0	0	2	-1	6.07164	-1	-1	-1	-1
162	94	32	1	1	0	31.0116	32.3925	1.11102	2		-1	-1	0	0	-1	-1	6.06927	-1	-1	-1	-1
379	63	20	2	2	0	248.357	41.6	2.02196	2		-1	-1	0	0	-1	-1	6.06687	-1	-1	-1	-1
388	88	44	5	5	0	257.658	17.0444	1.07363	2		-1	-1	0	0	-1	-1	6.0658	-1	-1	-1	-1
138	104	74	1	1	0	7.49676	29.2741	-0.451023	2		-1	-1	0	0	-1	-1	6.06466	-1	-1	-1	-1
331	39	48	2	2	1	200.377	40.8832	2.94144	2		-1	-1	0	0	2	-1	6.06368	-1	-1	-1	-1
223	72	39	3	3	0	92.994	21.947	1.87773	2		-1	-1	0	0	-1	-1	6.06353	-1	-1	-1	-1
419	112	62	3	3	0	288.888	32.998	-0.0354075	2		-1	-1	0	0	-1	-1	6.06094	-1	-1	-1	-1
283	58	54	4	4	0	152.597	20.5578	2.94721	2		-1	-1	0	0	-1	-1	6.05941	-1	-1	-1	-1
336	41	38	2	2	0	205.461	42.7557	2.70227	2		-1	-1	0	0	-1	-1	6.05812	-1	-1	-1	-1
286	104	30	2	2	0	156.689	39.0031	0.896083	2		-1	-1	0	0	-1	-1	6.05732	-1	-1	-1	-1
427	80	43	5	5	0	296.443	16.1303	1.57533	2		-1	-1	0	0	-1	-1	6.04788	-1	-1	-1	-1
238	60	89	2	2	0	107.162	33.8125	-2.05721	2		-1	-1	0	0	-1	-1	6.04267	-1	-1	-1	-1
397	109	30	2	2	0	266.519	41.3948	0.8197	2		-1	-1	0	0	-1	-1	6.04146	-1	-1	-1	-1
231.498	38.7264	44	1	1	0	101.369	41.9511	2.80355	2		-1	-1	0	0	-1	-1	6.04079	-1	-1	-1	-1
289	95	48	4	4	0	159.201	20.2413	0.629774	2		-1	-1	0	0	-1	-1	6.0395	-1	-1	-1	-1
363	79	42	5	5	0	232.714	16.3203	1.61932	2		-1	-1	0	0	-1	-1	6.03741	-1	-1	-1	-1
150	49	39	1	1	0	19.9119	35.9461	2.57592	2		-1	-1	0	0	-1	-1	6.03738	-1	-1	-1	-1
394	123	69	2	2	0	264.096	45.1589	-0.176206	2		-1	-1	0	0	-1	-1	6.03251	-1	-1	-1	-1
305	83	93	2	2	0	174.272	34.631	-1.37505	2		-1	-1	0	0	-1	-1	6.03136	-1	-1	-1	-1
174	52	82	2	2	0	44.3202	33.6885	-2.38525	2		-1	-1	0	0	-1	-1	6.02962	-1	-1	-1	-1
245	110	51	2	2	0	115.137	33.6885	0.324333	2		-1	-1	0	0	-1	-1	6.02938	-1	-1	-1	-1
382	79	42	5	5	0	251.618	16.4353	1.62759	2		-1	-1	0	0	-1	-1	6.02924	-1	-1	-1	-1
380	118	48	2	2	0	249.919	40.3803	0.317865	2		-1	-1	0	0	-1	-1	6.02924	-1	-1	-1	-1
288	53	35	2	2	0	157.897	34.6452	2.43323	2		-1	-1	0	0	-1	-1	6.02867	-1	-1	-1	-1
230	43	67	2	2	0	99.5565	35.11	-2.88911	2		-1	-1	0	0	-1	-1	6.02445	-1	-1	-1	-1
296	90	81	3	3	0	165.512	25.146	-1.02017	2		-1	-1	0	0	-1	-1	6.02247	-1	-1	-1	-1
165	101	34	1	1	0	33.9669	34.9067	0.906315	2		-1	-1	0	0	-1	-1	6.02143	-1	-1	-1	-1
311	122	68	2	2	0	181.206	44.7039	-0.154979	2		-1	-1	0	0	-1	-1	6.02124	-1	-1	-1	-1
388	119	49	2	2	0	257.874	41.0797	0.290174	2		-1	-1	0	0	-1	-1	6.02024	-1	-1	-1	-1
223	90	25	1	1	0	93.1733	37.4366	1.28502	2		-1	-1	0	0	-1	-1	6.00809	-1	-1	-1	-1
265	106	35	2	2	0	135.603	37.4264	0.76955	2		-1	-1	0	0	-1	-1	6.00799	-1	-1	-1	-1
361	43	39	2	2	0	230.414	40.718	2.7043	2		-1	-1	0	0	-1	-1	6.00465	-1	-1	-1	-1
296	62	60	5	5	0	165.516	16.1279	-3.01398	2		-1	-1	0	0	-1	-1	6.00168	-1	-1	-1	-1
334	57	25	2	2	0	203.735	39.7368	2.20179	2		-1	-1	0	0	-1	-1	6.00149	-1	-1	-1	-1
402	82	97	2	2	1	272.339	38.4338	-1.43824	2		-1	-1	0	0	2	-1	5.99899	-1	-1	-1	-1
299	65	44	4	4	0	168.838	19.7835	2.35363	2		-1	-1	0	0	-1	-1	5.99497	-1	-1	-1	-1
238	114	66	2	2	0	107.815	37.0126	-0.104661	2		-1	-1	0	0	-1	-1	5.9873	-1	-1	-1	-1
304	37	68	2	2	0	173.048	42.2252	-2.86353	2		-1	-1	0	0	-1	-1	5.98518	-1	-1	-1	-1
297	58	55	4	4	0	166.552	20.4639	3.00975	2		-1	-1	0	0	-1	-1	5.98113	-1	-1	-1	-1
179	49	65	2	2	0	49.1468	29.0898	-2.92431	2		-1	-1	0	0	-1	-1	5.98108	-1	-1	-1	-1
153	98	44	2	2	0	22.0938	25.5001	0.736075	2		-1	-1	0	0	-1	-1	5.98005	-1	-1	-1	-1
219	112	64	2	2	0	88.6662	34.7644	-0.0492411	2		-1	-1	0	0	-1	-1	5.97469	-1	-1	-1	-1
141	101	55	2	1	1	10.2288	23.1338	0.266586	2		-1	-1	0	0	-1	-1	5.97409	-1	-1	-1	-1
263	53	35	2	2	0	133.016	34.7973	2.41608	2		-1	-1	0	0	-1	-1	5.97026	-1	-1	-1	-1
258	54	35	2	2	0	128.041	34.1378	2.39212	2		-1	-1	0	0	-1	-1	5.96793	-1	-1	-1	-1
175	59	40	2	2	0	44.8058	27.6712	2.37352	2		-1	-1	0	0	-1	-1	5.96694	-1	-1	-1	-1
217	95	35	2	3	1	86.9541	30.8243	1.02112	2		-1	-1	0	0	-1	-1	5.96657	-1	-1	-1	-1
375	113	76	2	2	0	245.118	38.3334	-0.420635	2		-1	-1	0	0	-1	-1	5.96213	-1	-1	-1	-1
363	64	20	2	2	0	232.524	41.101	1.99772	2		-1	-1	0	0	-1	-1	5.96192	-1	-1	-1	-1
191	89	55	5	5	0	60.6129	12.6394	0.500693	2		-1	-1	0	0	-1	-1	5.96106	-1	-1	-1	-1
262	70	52	6	6	0	131.83	10.7643	2.4198	2		-1	-1	0	0	-1	-1	5.96045	-1	-1	-1	-1
406	72	74	4	4	0	275.982	16.8407	-1.94968	2		-1	-1	0	0	-1	-1	5.95431	-1	-1	-1	-1
302	95	47	4	4	0	172.182	20.5195	0.665711	2		-1	-1	0	0	-1	-1	5.95076	-1	-1	-1	-1
289	63	61	5	5	0	158.512	15.1264	-2.95173	2		-1	-1	0	0	-1	-1	5.94947	-1	-1	-1	-1
317	61	61	5	4	1	186.506	17.5432	-2.94374	1.91394		-1	-1	0	0	-1	-1	5.94723	-1	-1	-1	-1
161	61	52	3	3	0	30.906	18.8505	2.7516	2		-1	-1	0	0	-1	-1	5.94703	-1	-1	-1	-1
289	75	22	2	3	1	159.442	37.1008	1.7086	2		-1	-1	0	0	-1	-1	5.94571	-1	-1	-1	-1
143	100	36	1	1	0	11.9244	32.2108	0.890501	2		-1	-1	0	0	-1	-1	5.94405	-1	-1	-1	-1
260	89	81	3	3	0	129.399	24.2202	-1.02534	2		-1	-1	0	0	-1	-1	5.94221	-1	-1	-1	-1
354	116	75	2	2	0	224.113	40.7864	-0.36483	2		-1	-1	0	0	-1	-1	5.94059	-1	-1	-1	-1
344	84	23	2	3	1	213.928	35.7162	1.47832	2		-1	-1	0	0	-1	-1	5.93762	-1	-1	-1	-1
323	106	91	2	2	0	192.77	42.6382	-0.811173	2		-1	-1	0	0	-1	-1	5.93565	-1	-1	-1	-1
203	106	48	2	2	0	72.6029	31.0991	0.467848	2		-1	-1	0	0	-1	-1	5.93363	-1	-1	-1	-1
268	59	28	2	2	0	138.22	36.5845	2.1654	2		-1	-1	0	0	-1	-1	5.93321	-1	-1	-1	-1
197	116	40	1	1	0	66.4349	43.5573	0.545274	2		-1	-1	0	0	-1	-1	5.92827	-1	-1	-1	-1
319	112	35	2	2	0	189.456	41.0027	0.666837	2		-1	-1	0	0	-1	-1	5.92737	-1	-1	-1	-1
325	93	82	3	3	0	194.713	27.679	-0.961177	2		-1	-1	0	0	-1	-1	5.92705	-1	-1	-1	-1
293	109	35	2	2	0	163.626	39.101	0.713962	2		-1	-1	0	0	-1	-1	5.92305	-1	-1	-1	-1
355	51	48	3	3	0	224.504	29.6424	2.84342	2		-1	-1	0	0	-1	-1	5.92261	-1	-1	-1	-1
319	116	50	2	2	0	189.337	38.5496	0.278929	2		-1	-1	0	0	-1	-1	5.92261	-1	-1	-1	-1
200	44	80	1	1	0	69.9335	38.805	-2.55591	2		-1	-1	0	0	-1	-1	5.92181	-1	-1	-1	-1
420	96	49	5	5	0	289.612	19.5846	0.591211	2		-1	-1	0	0	-1	-1	5.91982	-1	-1	-1	-1
275	54	49	3	3	0	144.676	25.9345	2.791	2		-1	-1	0	0	-1	-1	5.91958	-1	-1	-1	-1
243	85	31	2	3	1	113.336	29.9045	1.37385	2		-1	-1	0	0	-1	-1	5.91957	-1	-1	-1	-1
198	57	40	2	2	0	67.9123	28.9573	2.4155	2		-1	-1	0	0	-1	-1	5.91863	-1	-1	-1	-1
182	109	65	2	2	0	51.3794	31.6539	-0.0891951	2		-1	-1	0	0	-1	-1	5.91726	-1	-1	-1	-1
290	40	47	2	2	0	159.476	39.8456	2.89333	2		-1	-1	0	0	-1	-1	5.91657	-1	-1	-1	-1
291	78	44	5	5	0	161.044	14.9442	1.62916	2		-1	-1	0	0	-1	-1	5.91614	-1	-1	-1	-1
303	89	35	3	4	1	173.293	26.0738	1.19976	2		-1	-1	0	0	-1	-1	5.91555	-1	-1	-1	-1
160	83	55	6	6	0	29.5603	7.15126	0.857525	2		-1	-1	0	0	-1	-1	5.91543	-1	-1	-1	-1
344	56	24	2	2	1	213.637	41.14	2.21184	2		-1	-1	0	0	2	-1	5.9131	-1	-1	-1	-1
289	65	66	5	5	0	158.44	14.7625	-2.59043	2		-1	-1	0	0	-1	-1	5.91192	-1	-1	-1	-1
269	91	91	2	2	0	138.209	34.2566	-1.11607	2		-1	-1	0	0	-1	-1	5.91172	-1	-1	-1	-1
271	51	82	2	2	0	139.935	35.0403	-2.3834	2		-1	-1	0	0	-1	-1	5.91132	-1	-1	-1	-1
182	68	33	2	2	0	51.6758	29.0453	1.96761	2		-1	-1	0	0	-1	-1	5.91109	-1	-1	-1	-1
193	59	40	2	2	0	62.8776	27.6031	2.36544	2		-1	-1	0	0	-1	-1	5.91007	-1	-1	-1	-1
182	116	52	1	1	0	51.2025	39.2205	0.272605	2		-1	-1	0	0	-1	-1	5.90334	-1	-1	-1	-1
249	103	62	3	3	1	118.898	25.5516	-0.027963	1.56971		-1	-1	0	0	2	-1	5.90143	-1	-1	-1	-1
154	87	73	4	4	0	23.7877	15.7133	-0.913712	2		-1	-1	0	0	-1	-1	5.90023	-1	-1	-1	-1
217	83	32	2	3	1	87.002	28.8709	1.43351	2		-1	-1	0	0	-1	-1	5.8948	-1	-1	-1	-1
508	85	100	3	3	0	379.095	39.0575	-1.35807	2		-1	-1	0	0	-1	-1	5.89474	-1	-1	-1	-1
286	97	29	2	3	1	156.616	35.5643	1.06223	2		-1	-1	0	0	-1	-1	5.89328	-1	-1	-1	-1
175	43	64	1	1	0	45.2605	34.9648	-2.97919	2		-1	-1	0	0	-1	-1	5.88906	-1	-1	-1	-1
425	67	31	3	3	0	294.195	30.5829	2.03639	2		-1	-1	0	0	-1	-1	5.88761	-1	-1	-1	-1
295	114	50	2	2	0	165.409	36.9981	0.298406	2		-1	-1	0	0	-1	-1	5.88098	-1	-1	-1	-1
372	67	47	5	5	0	241.612	16.4758	2.43768	2		-1	-1	0	0	-1	-1	5.87814	-1	-1	-1	-1
168	60	52	3	3	0	37.9157	19.691	2.76642	2		-1	-1	0	0	-1	-1	5.87807	-1	-1	-1	-1
376	70	32	3	3	0	245.517	27.8663	1.95506	2		-1	-1	0	0	-1	-1	5.87682	-1	-1	-1	-1
339	87	45	5	5	0	208.919	15.745	1.06734	2		-1	-1	0	0	-1	-1	5.87289	-1	-1	-1	-1
179	98	30	1	1	0	48.2196	36.5083	1.03909	2		-1	-1	0	0	-1	-1	5.87048	-1	-1	-1	-1
378	116	38	2	2	0	247.843	42.275	0.560503	2		-1	-1	0	0	-1	-1	5.87045	-1	-1	-1	-1
379	66	42	4	4	0	248.551	20.9223	2.29694	2		-1	-1	0	0	-1	-1	5.87012	-1	-1	-1	-1
302	114	49	2	2	0	172.406	37.126	0.321971	2		-1	-1	0	0	-1	-1	5.87003	-1	-1	-1	-1
246	112	74	2	2	0	115.71	37.2552	-0.331162	2		-1	-1	0	0	-1	-1	5.86963	-1	-1	-1	-1
111	66	58	1	1	0	-19.0666	12.9825	3.09818	2		-1	-1	0	0	-1	-1	5.8646	-1	-1	-1	-1
245	114	66	2	2	0	114.873	36.993	-0.108321	2		-1	-1	0	0	-1	-1	5.86131	-1	-1	-1	-1
317	69	35	3	3	0	186.928	25.3251	2.00683	2		-1	-1	0	0	-1	-1	5.85594	-1	-1	-1	-1
207	106	48	2	2	0	76.6625	31.1126	0.467036	2		-1	-1	0	0	-1	-1	5.85569	-1	-1	-1	-1
149	69	39	2	2	0	18.544	22.885	2.04253	2		-1	-1	0	0	-1	-1	5.85538	-1	-1	-1	-1
342	105	43	3	3	1	212.099	30.4672	0.583752	2		-1	-1	0	0	2	-1	5.85415	-1	-1	-1	-1
237	35	55	1	1	0	106.634	42.7654	3.07989	2		-1	-1	0	0	-1	-1	5.85267	-1	-1	-1	-1
137	90	82	1	1	0	6.89044	25.0793	-1.03467	2		-1	-1	0	0	-1	-1	5.8497	-1	-1	-1	-1
159	111	63	1	1	0	28.1779	33.0861	-0.0302238	2		-1	-1	0	0	-1	-1	5.84674	-1	-1	-1	-1
221	88	77	3	3	0	90.5492	19.7719	-0.949755	2		-1	-1	0	0	-1	-1	5.84631	-1	-1	-1	-1
[truncated: 775 more rows]
